# Supplementary material for: A palladium-catalyzed cross-electrophile coupling reaction involving sulfur dioxide for the direct synthesis of diversely functionalized sulfones
Source: Royal Society of Chemistry journal article supplement (doi:10.1039/d3qo00690e), 2023-01-01

## Supporting Information

### Palladium-Catalyzed Cross-Electrophile Coupling Reaction involving Sulfur Dioxide for the Direct Synthesis of Diverse Functionalized Sulfones

Baojian Xiong,<sup>[a]‡</sup> Jinyu Zhang,<sup>[a]‡</sup> Ting Wang,<sup>[b]‡</sup> Xuemei Zhang,<sup>[a]</sup> Guijuan Cheng,<sup>[b]\*</sup> and Zhong Lian<sup>[a]\*</sup>

‡ These authors contributed equally to this work

<sup>[a]</sup> Department of Dermatology, State Key Laboratory of Biotherapy and Cancer Center, West China Hospital, Sichuan University, Chengdu 610041, P.R. China

<sup>[b]</sup> Warshel Institute for Computational Biology, School of Life and Health Sciences, School of Medicine, The Chinese University of Hong Kong (Shenzhen), Shenzhen 518172, China

\*Guijuan Cheng –chengguijuan@cuhk.edu.cn

\*Zhong Lian – lianzhong@scu.edu.cn

#### Table of Content

|                                                  |     |
|--------------------------------------------------|-----|
| General information and Materials: .....         | S2  |
| Optimization Table.....                          | S3  |
| General Procedures .....                         | S4  |
| The procedure for the gram scale reactions:..... | S6  |
| Mechanistic Experiments.....                     | S8  |
| Computational Details .....                      | S11 |
| X-Ray Crystal Structures .....                   | S35 |
| Characterization data of products.....           | S36 |

## General information and Materials

Unless otherwise noted, all reactions or reagents were obtained from commercial suppliers and used as received. Unless otherwise noted, all strict water-free and oxygen-free conditions were carried in an argon atmosphere glovebox (Vigor, SGI800-750TS-F). The substrates and reagents for catalytic reactions were degassed and stored in the glovebox, unless otherwise noted. All work-up and purification procedures were carried out with reagent-grade solvents in air.

Thin Layer Chromatography analyses were performed on silica gel coated glass plates (0.25 mm) with fluorescence indicator UV254. For detection of spots, irradiation of UV light at 254 nm or staining reagent using phosphomolybdic acid solution was used. Flash column chromatography was conducted with silica gel 60 (particle size 230–400 mesh, Huanghai) at room temperature and under elevated pressure.

Gas Chromatography (GC) analysis was conducted on a Shimadzu GC-2030 instrument equipped with a Rtx-5 column (30 m × 0.25 mm) with dodecane as an internal standard. GC-MS analysis was conducted on Agilent 5977B GC/MSD instrument equipped with a HP-5MS UI column (30 m × 0.25 mm). <sup>1</sup>H NMR, <sup>13</sup>C NMR and <sup>19</sup>F NMR spectra were recorded at 400 MHz, 101 MHz and 376 MHz, respectively in CDCl<sub>3</sub> (or DMSO-*d*<sub>6</sub>) at room temperature. <sup>1</sup>H NMR was reported as follows: chemical shift, multiplicity (s = singlet, d = doublet, t = triplet, q = quadruplet, m = multiplet), coupling constant (*J* values) in Hz and integration.

## Optimization Table

**Table S1: Optimization of the Pd-Catalyzed Cross-Electrophile Coupling Reaction**

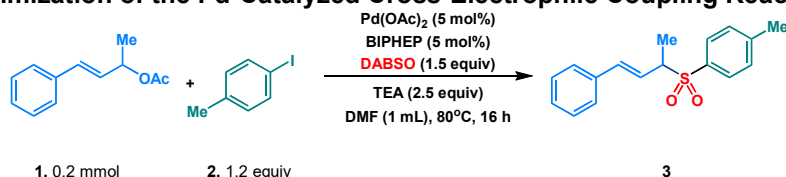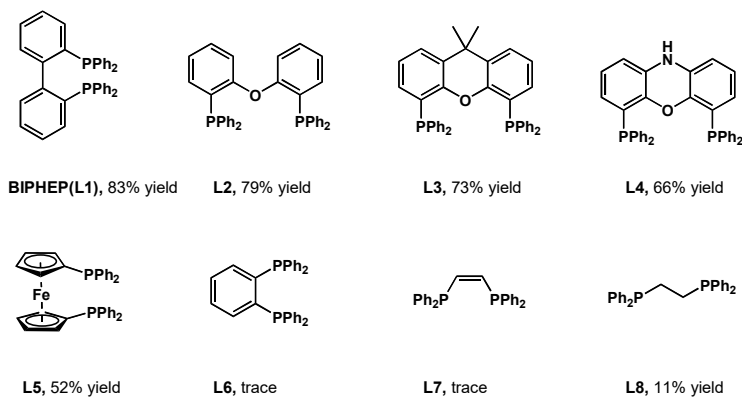

| Entry | Deviation from std. conditions                                     | Yield of <b>3a</b> <sup>a</sup> |
|-------|--------------------------------------------------------------------|---------------------------------|
| 1     | none                                                               | 83% (81%) <sup>b</sup>          |
| 2     | Pd(TFA) <sub>2</sub> instead of Pd(OAc) <sub>2</sub>               | 77%                             |
| 3     | Pd(acac) <sub>2</sub> instead of Pd(OAc) <sub>2</sub>              | 70%                             |
| 4     | Pd <sub>2</sub> (dba) <sub>3</sub> instead of Pd(OAc) <sub>2</sub> | 65%                             |
| 5     | <b>L2</b> instead of <b>L1</b>                                     | 79%                             |
| 6     | <b>L3</b> instead of <b>L1</b>                                     | 73%                             |
| 7     | <b>L4</b> instead of <b>L1</b>                                     | 66%                             |
| 8     | <b>L5</b> instead of <b>L1</b>                                     | 52%                             |
| 9     | <b>L6</b> instead of <b>L1</b>                                     | trace                           |
| 10    | <b>L7</b> instead of <b>L1</b>                                     | trace                           |
| 11    | <b>L8</b> instead of <b>L1</b>                                     | 11%                             |
| 12    | DIPEA instead of TEA                                               | 45%                             |
| 13    | DBU instead of TEA                                                 | nd                              |
| 14    | DMAP instead of TEA                                                | nd                              |
| 15    | Na <sub>2</sub> S <sub>2</sub> O <sub>5</sub> instead of DABSO     | nd                              |
| 16    | K <sub>2</sub> S <sub>2</sub> O <sub>5</sub> instead of DABSO      | nd                              |
| 17    | Na <sub>2</sub> S <sub>2</sub> O <sub>8</sub> instead of DABSO     | nd                              |
| 18    | K <sub>2</sub> S <sub>2</sub> O <sub>8</sub> instead of DABSO      | nd                              |
| 19    | SOgen instead of DABSO                                             | trace                           |
| 20    | Without Pd(OAc) <sub>2</sub> / <b>L1</b>                           | nd                              |

<sup>a</sup>Yields determined by GC analysis using n-dodecane as the internal standard; <sup>b</sup>Isolated yield in the parenthesis.

The initial study started with the attempts on the introduction of SO<sub>2</sub> into allylic acetate and aryl iodide (Table S1). (E)-4-phenylbut-3-en-2-yl **1**, 1-iodo-4-methylbenzene **2** and DABSO were employed as the substrates to evaluate this Pd-catalyzed multicomponent cross-electrophile coupling reaction. After evaluation of a range of reaction parameters, we found that a combination of Pd(OAc)<sub>2</sub> (5 mol%), BIPHEP (5 mol%), and TEA (2.5 equiv) in DMF (1 mL) at 80 °C provided the best results, giving rise to **3** in 81% isolated yield (Table S1, entry 1). When Pd(OAc)<sub>2</sub> was replaced by other palladium sources such as Pd(TFA)<sub>2</sub>, Pd(acac)<sub>2</sub> and Pd<sub>2</sub>(dba)<sub>3</sub>, the efficiency of the reaction decreased slightly (entries 2-4). A comparison of entries 5–11 reveals that the characteristic of the ligand played an important role, with bidentate phosphine ligand (**L1**) providing the best interplay between electronic and steric effects. It was found that the type of the base has a significant impact on the reaction (entries 12-14). Switching the TEA to DIPEA caused a precipitous decrease in the yield, moreover, no desired product was detected when other bases such as DBU and DMAP were used. Various inorganic SO<sub>2</sub> surrogates such as Na<sub>2</sub>S<sub>2</sub>O<sub>5</sub>, K<sub>2</sub>S<sub>2</sub>O<sub>5</sub>, Na<sub>2</sub>S<sub>2</sub>O<sub>8</sub> or K<sub>2</sub>S<sub>2</sub>O<sub>8</sub> were tested, however, no reaction was observed (entries 15-18). Finally, a control experiment demonstrated that the catalyst and ligand were essential to this transformation (entry 19).

## General Procedures

### General procedure 1: Synthesis of allylic-aryl sulfones (compounds 3-51)

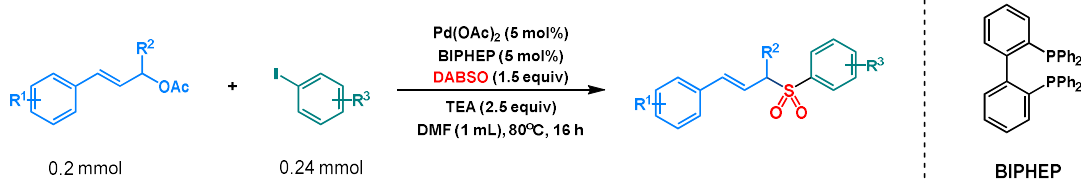

In an argon fulfilled glovebox, allylic acetate (0.2 mmol, 1 equiv), aryl iodide (0.24 mmol, 1.2 equiv), Pd(OAc)<sub>2</sub> (2.2 mg, 0.01 mmol, 0.05 equiv), BIPHEP (5.2 mg, 0.01 mmol, 0.05 equiv), DABSO (72.1 mg, 1.5 equiv), and TEA (0.5 mmol, 2.5 equiv) were added as this order into an oven-dried 4 mL vial with a magnetic stirring bar, followed by addition of DMF (1.0 mL). The vial was sealed and removed out of the glovebox, then heated to 80 °C using heating mantle with 600-700 rpm stirring speed. After 16 h, the vial was cooled to room temperature. The mixture was passed through a short silica gel pad with EtOAc. The filtrate was washed by H<sub>2</sub>O (3×5 mL), dried over anhydrous Na<sub>2</sub>SO<sub>4</sub>, then concentrated and the residue was purified by flash column chromatography to give the desired products **3-51**.



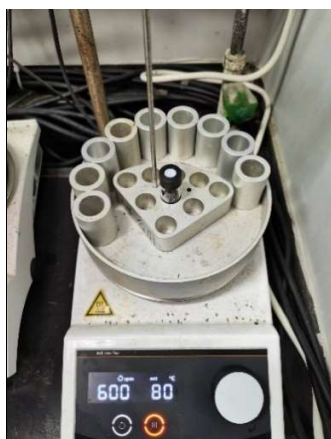

**Figure S1** | The heat source used in this study.

**General procedure 2: Synthesis of sulfone-containing heterocycles (compounds 52-67, 73-84)**

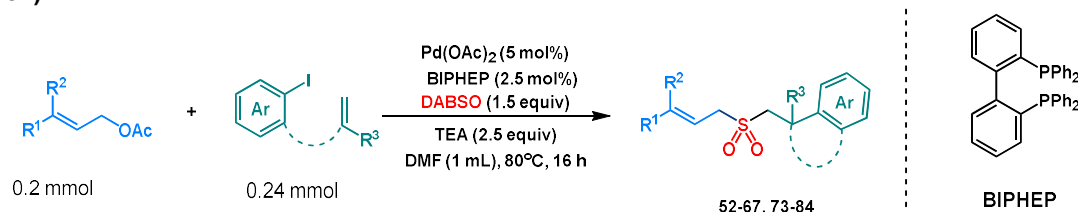

In an argon fulfilled glovebox, allylic acetate (0.2 mmol, 1 equiv), alkene-tethered aryl halide (0.24 mmol, 1.2 equiv), Pd(OAc)<sub>2</sub> (2.2 mg, 0.01 mmol, 0.05 equiv), BIPHEP (2.6 mg, 0.005 mmol, 0.025 equiv), DABSO (72.1 mg, 1.5 equiv), and TEA (0.5 mmol, 2.5 equiv) were added as this order into an oven-dried 4 mL vial with a magnetic stirring bar, followed by addition of DMF (1.0 mL). The vial was sealed and removed out of the glovebox, then heated to 80 °C using heating mantle with 600-700 rpm stirring speed. After 16 h, the vial was cooled to room temperature. The mixture was passed through a short silica gel pad with EtOAc. The filtrate was washed by H<sub>2</sub>O (3×5 mL), dried over anhydrous Na<sub>2</sub>SO<sub>4</sub>, then concentrated and the residue was purified by flash column chromatography to give the desired products **52-67, 73-84**.

**General procedure 3: Synthesis of sulfone-containing hetero- and carbocyclic scaffolds (compounds 68-72)**

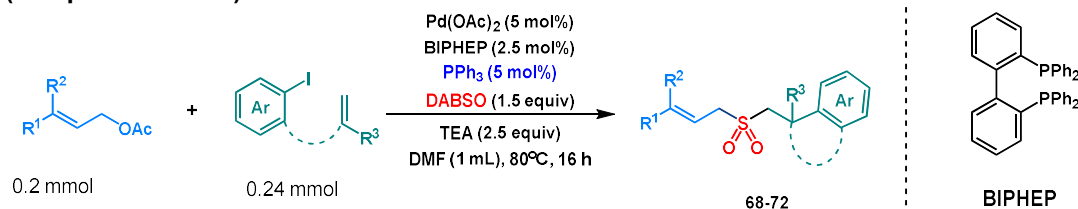

In an argon fulfilled glovebox, allylic acetate (0.2 mmol, 1 equiv), alkene-tethered aryl halide (0.24 mmol, 1.2 equiv), Pd(OAc)<sub>2</sub> (2.2 mg, 0.01 mmol, 0.05 equiv), BIPHEP (2.6 mg, 0.005 mmol, 0.025 equiv), PPh<sub>3</sub> (2.6 mg, 0.01 mmol, 0.05 equiv) DABSO (72.1 mg, 1.5 equiv), and TEA (0.5 mmol, 2.5 equiv) were added as this order into an oven-dried 4 mL vial with a magnetic stirring bar,

followed by addition of DMF (1.0 mL). The vial was sealed and removed out of the glovebox, then heated to 80 °C using heating mantle with 600-700 rpm stirring speed. After 16 h, the vial was cooled to room temperature. The mixture was passed through a short silica gel pad with EtOAc. The filtrate was washed by H<sub>2</sub>O (3×5 mL), dried over anhydrous Na<sub>2</sub>SO<sub>4</sub>, then concentrated and the residue was purified by flash column chromatography to give the desired products **68-72**.

**General procedure 4: Synthesis of propargyl-aryl sulfones (compounds 85-89)**

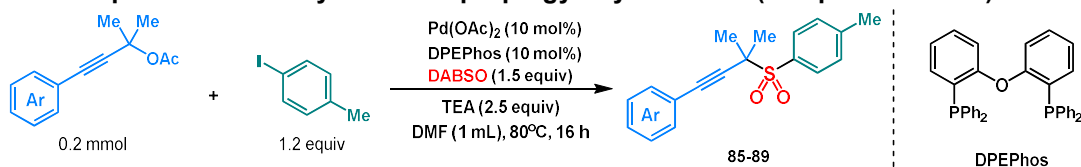

In an argon fulfilled glovebox, propargyl acetate (0.2 mmol, 1 equiv), 4-iodotoluene (0.24 mmol, 1.2 equiv), Pd(OAc)<sub>2</sub> (4.5 mg, 0.02 mmol, 0.1 equiv), DPEPhos (10.8 mg, 0.02 mmol, 0.1 equiv), DABSO (72.1 mg, 1.5 equiv), and TEA (0.5 mmol, 2.5 equiv) were added as this order into an oven-dried 4 mL vial with a magnetic stirring bar, followed by addition of DMF (1.0 mL). The vial was sealed and removed out of the glovebox, then heated to 80 °C using heating mantle with 600-700 rpm stirring speed. After 16 h, the vial was cooled to room temperature. The mixture was passed through a short silica gel pad with EtOAc. The filtrate was washed by H<sub>2</sub>O (3×5 mL), dried over anhydrous Na<sub>2</sub>SO<sub>4</sub>, then concentrated and the residue was purified by flash column chromatography to give the desired products **85-89**.

**General procedure 5: Synthesis of propargyl-alkyl sulfones (compounds 90-94)**

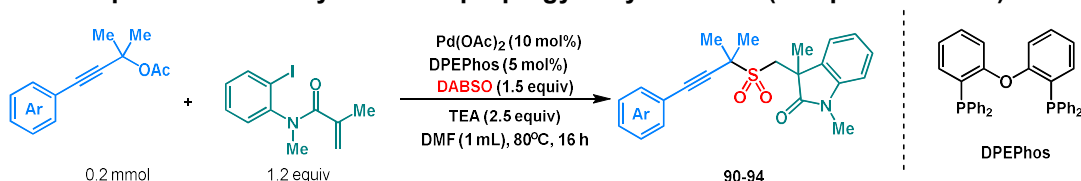

In an argon fulfilled glovebox, propargyl acetate (0.2 mmol, 1 equiv), *N*-(2-iodophenyl)-*N*-methylmethacrylamide (0.24 mmol, 1.2 equiv), Pd(OAc)<sub>2</sub> (4.5 mg, 0.02 mmol, 0.1 equiv), DPEPhos (5.4 mg, 0.01 mmol, 0.05 equiv), DABSO (72.1 mg, 1.5 equiv), and TEA (0.5 mmol, 2.5 equiv) were added as this order into an oven-dried 4 mL vial with a magnetic stirring bar, followed by addition of DMF (1.0 mL). The vial was sealed and removed out of the glovebox, then heated to 80 °C using heating mantle with 600-700 rpm stirring speed. After 16 h, the vial was cooled to room temperature. The mixture was passed through a short silica gel pad with EtOAc. The filtrate was washed by H<sub>2</sub>O (3×5 mL), dried over anhydrous Na<sub>2</sub>SO<sub>4</sub>, then concentrated and the residue was purified by flash column chromatography to give the desired products **90-94**.

**The procedure for the gram scale reactions:**

**1) Synthesis of compound 43**

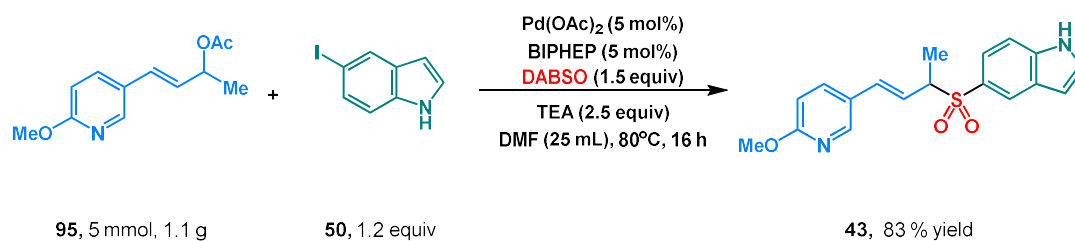

In an argon fulfilled glovebox, (E)-4-(6-methoxypyridin-3-yl)but-3-en-2-yl acetate **95** (1.1 g, 5.0 mmol), 5-iodo-1H-indole **50** (6.0 mmol, 1.2 equiv), Pd(OAc)<sub>2</sub> (56.0 mg, 0.25 mmol, 0.05 equiv), BIPHEP (130.6 mg, 0.25 mmol, 0.05 equiv), DABSO (7.5 mmol, 1.5 equiv) and TEA (12.5 mmol, 2.5 equiv) were added as this order into an oven-dried 100 mL seal-tube with a magnetic stirring bar, followed by addition of DMF (25 mL). The tube was sealed and removed out of the glovebox, then heated to 80 °C using oil bath with 600 rpm stirring speed. After 16 h, the seal-tube was cooled to room temperature. The mixture was passed through a short silica gel pad with EtOAc. The filtrate was washed by H<sub>2</sub>O (3×50 mL), dried over anhydrous Na<sub>2</sub>SO<sub>4</sub>, then concentrated and the residue was purified by flash column chromatography using petroleum/ethyl acetate (1:1) as eluent to give the desired product **43** as a white solid (1.421 g, 83% yield).

## 2) Synthesis of compound 97

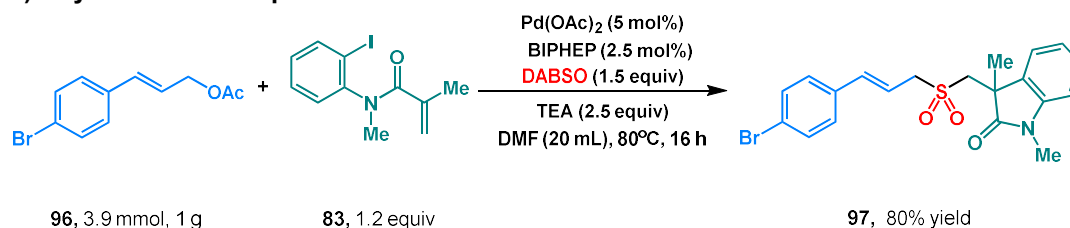

In an argon fulfilled glovebox, (E)-3-(4-bromophenyl)allyl acetate **96** (1.0 g, 3.9 mmol), N-(2-iodophenyl)-N-methylmethacrylamide **83** (4.7 mmol, 1.2 equiv), Pd(OAc)<sub>2</sub> (43.8 mg, 0.195 mmol, 0.05 equiv), BIPHEP (50.9 mg, 0.025 equiv), DABSO (5.85 mmol, 1.5 equiv) and TEA (9.75 mmol, 2.5 equiv) were added as this order into an oven-dried 100 mL seal-tube with a magnetic stirring bar, followed by addition of DMF (20 mL). The tube was sealed and removed out of the glovebox, then heated to 80 °C using oil bath with 600 rpm stirring speed. After 16 h, the seal-tube was cooled to room temperature. The mixture was passed through a short silica gel pad with EtOAc. The filtrate was washed by H<sub>2</sub>O (3×50 mL), dried over anhydrous Na<sub>2</sub>SO<sub>4</sub>, then concentrated and the residue was purified by flash column chromatography using petroleum/ethyl acetate (2:1) as eluent to give the desired product **97** as a white solid (1.355 g, 80% yield).

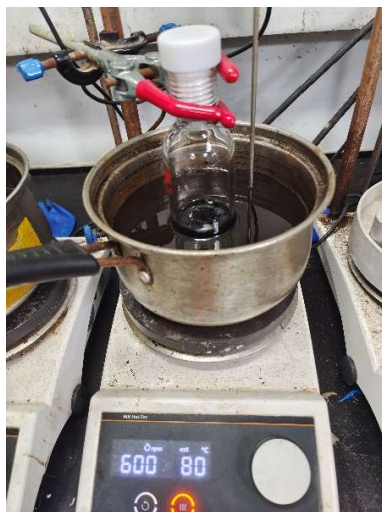

**Figure S2** | The heat source used in the gram scale reaction.

### Mechanistic Experiments

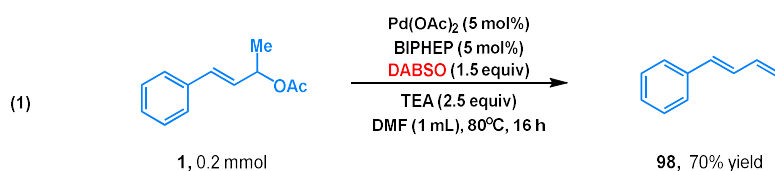

In an argon fulfilled glovebox, (*E*)-4-phenylbut-3-en-2-yl acetate **1** (0.2 mmol, 1 equiv), Pd(OAc)<sub>2</sub> (2.2 mg, 0.01 mmol, 0.05 equiv), BIPHEP (5.2 mg, 0.01 mmol, 0.05 equiv), DABSO (72.1 mg, 1.5 equiv), and TEA (0.5 mmol, 2.5 equiv) were added as this order into an oven-dried 4 mL vial with a magnetic stirring bar, followed by addition of DMF (1.0 mL). The vial was sealed and removed out of the glovebox, then heated to 80 °C using heating mantle with 600 rpm stirring speed. After 16 h, the vial was cooled to room temperature. The mixture was passed through a short silica gel pad with EtOAc. The filtrate was washed by H<sub>2</sub>O (3×5 mL), dried over anhydrous Na<sub>2</sub>SO<sub>4</sub>, then concentrated and the residue was purified by flash column chromatography using petroleum/ethyl acetate (100:1) as eluent to give the compound **98** as a colorless oil (18.2 mg, 70% yield).

<sup>1</sup>H NMR (400 MHz, CDCl<sub>3</sub>) δ 7.33 (d, *J* = 7.6 Hz, 2H), 7.24 (t, *J* = 7.6 Hz, 2H), 7.16 (d, *J* = 7.2 Hz, 1H), 6.71 (dd, *J* = 15.6, 10.4 Hz, 1H), 6.51 – 6.38 (m, 2H), 5.25 (d, *J* = 16.8 Hz, 1H), 5.09 (d, *J* = 10.0 Hz, 1H).



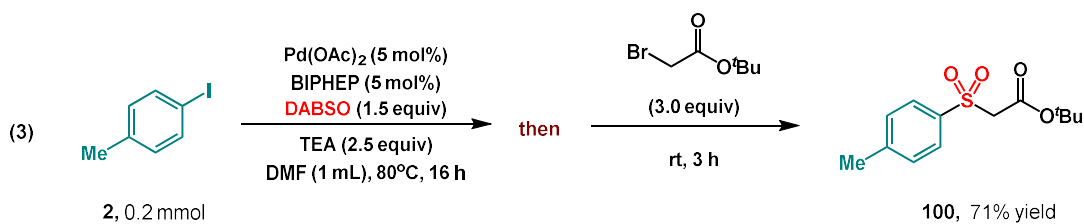

In an argon fulfilled glovebox, 1-iodo-4-methylbenzene **2** (0.2 mmol, 1 equiv),  $\text{Pd(OAc)}_2$  (2.2 mg, 0.01 mmol, 0.05 equiv), BIPHEP (5.2 mg, 0.01 mmol, 0.05 equiv), DABSO (72.1 mg, 1.5 equiv), and TEA (0.5 mmol, 2.5 equiv) were added as this order into an oven-dried 4 mL vial with a magnetic stirring bar, followed by addition of DMF (1.0 mL). The vial was sealed and removed out of the glovebox, then heated to 80 °C using heating mantle with 600 rpm stirring speed. After 16 h, the resulting mixture was cooled to room temperature before adding *t*-butylbromoacetate (0.6 mmol, 3 equiv). The reaction was left to stir at room temperature for an additional 3 hours. The mixture was passed through a short silica gel pad with EtOAc. The filtrate was washed by  $\text{H}_2\text{O}$  (3×5 mL), dried over anhydrous  $\text{Na}_2\text{SO}_4$ , then concentrated and the residue was purified by flash column chromatography using petroleum/ethyl acetate (3:1) as eluent to give the compound **100** as a colorless oil (38.4 mg, 71% yield).

$^1\text{H NMR}$  (400 MHz,  $\text{CDCl}_3$ )  $\delta$  7.75 (d,  $J = 8.0$  Hz, 2H), 7.29 (d,  $J = 7.2$  Hz, 2H), 3.94 (d,  $J = 2.0$  Hz, 2H), 2.38 (s, 3H), 1.30 (d,  $J = 2.0$  Hz, 9H).

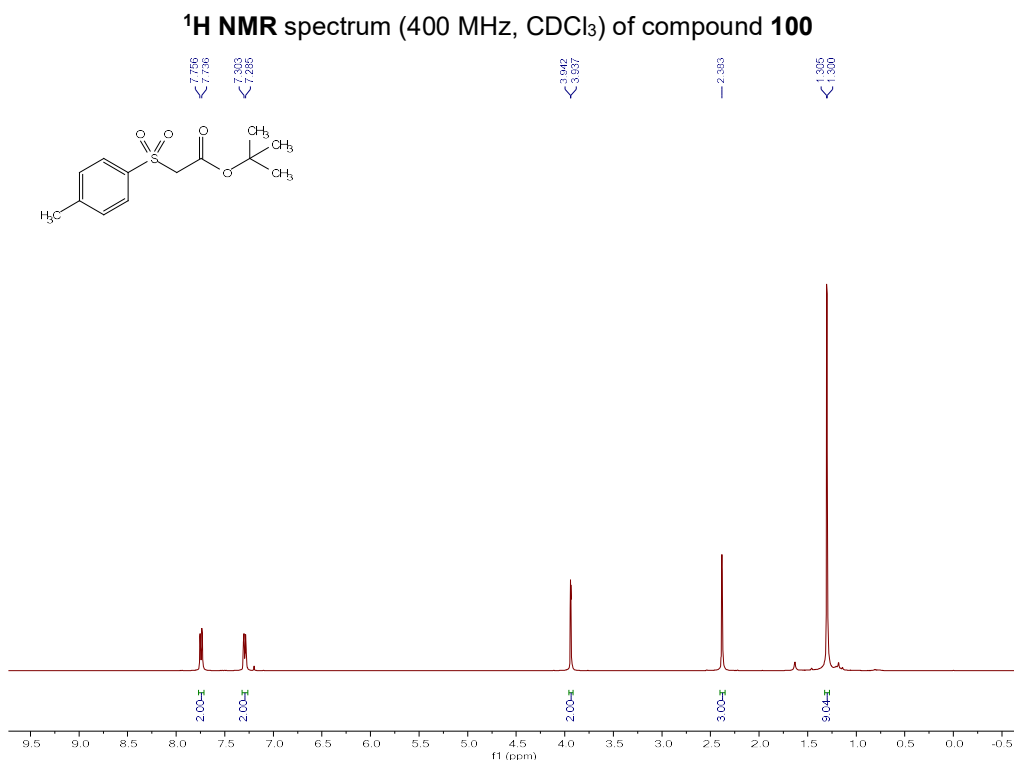

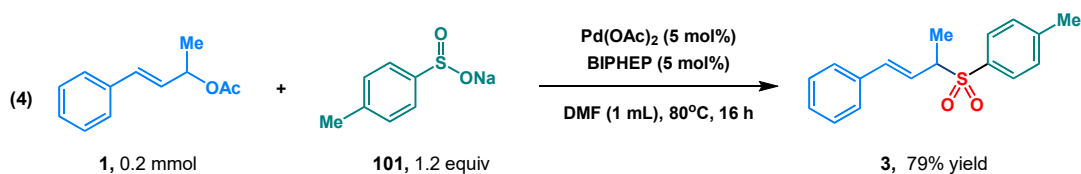

In an argon fulfilled glovebox, (*E*)-4-phenylbut-3-en-2-yl acetate **1** (0.2 mmol, 1 equiv), sodium 4-methylbenzenesulfinate **101** (0.24 mmol, 1.2 equiv), Pd(OAc)<sub>2</sub> (2.2 mg, 0.01 mmol, 0.05 equiv) and BIPHEP (5.2 mg, 0.01 mmol, 0.05 equiv) were added as this order into an oven-dried 4 mL vial with a magnetic stirring bar, followed by addition of DMF (1.0 mL). The vial was sealed and removed out of the glovebox, then heated to 80 °C using heating mantle with 600 rpm stirring speed. After 16 h, the vial was cooled to room temperature. The mixture was passed through a short silica gel pad with EtOAc. The filtrate was washed by H<sub>2</sub>O (3×5 mL), dried over anhydrous Na<sub>2</sub>SO<sub>4</sub>, then concentrated and the residue was purified by flash column chromatography using petroleum/ethyl acetate (10:1) as eluent to give the compound **3** as a white solid (45.2 mg, 79% yield).

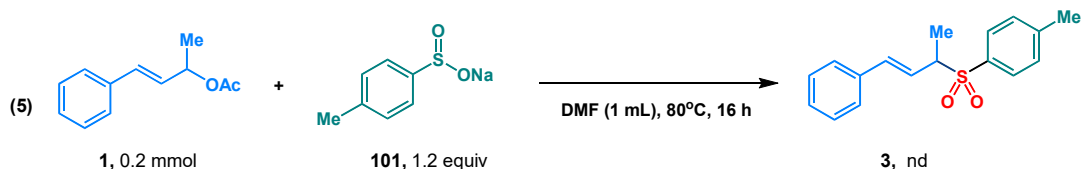

In an argon fulfilled glovebox, (*E*)-4-phenylbut-3-en-2-yl acetate **1** (0.2 mmol, 1 equiv), sodium 4-methylbenzenesulfinate **101** (0.24 mmol, 1.2 equiv) were added as this order into an oven-dried 4 mL vial with a magnetic stirring bar, followed by addition of DMF (1.0 mL). The vial was sealed and removed out of the glovebox, then heated to 80 °C using heating mantle with 600 rpm stirring speed. After 16 h, the vial was cooled to room temperature. The mixture was passed through a short silica gel pad with EtOAc. The filtrate was analyzed by GC-MS and GC, *no desired product 3 was found in this reaction.*

## Computational Details

### Computational Methods

All the calculations were performed with Gaussian 16 package.<sup>[1]</sup> Geometries were optimized in gas phase by using unrestricted MN15<sup>[2]</sup> and a mixed basis set of SDD<sup>[3]</sup> for Pd, P, and I, and 6-31G(d,p)<sup>[4]</sup> basis set for all other atoms at temperature of 353K. Optimized geometries were verified by frequency computations as minima (zero imaginary frequencies) or transition state (a single imaginary frequency) at the same level of theory. The transition states (TSs) were also confirmed by viewing normal mode vibrational vector. Solvent effect was included by single-point energy calculation using SMD model with toluene as the solvent and MN15 method with def2-TZVP basis set for Pd, P, and I, and 6-311++G(d,p) basis set for other atoms.<sup>[5]</sup> All relative Gibbs free energies

and electronic energies were reported in kcal/mol.

## References

- [1] Gaussian 16, Frisch, M. J.; Trucks, G. W.; Schlegel, H. B.; Scuseria, G. E.; Robb, M. A.; Cheeseman, J. R.; Scalmani, G.; Barone, V.; Petersson, G. A.; Nakatsuji, H.; Li, X.; Caricato, M.; Marenich, A. V.; Bloino, J.; Janesko, B. G.; Gomperts, R.; Mennucci, B.; Hratchian, H. P.; Ortiz, J. V.; Izmaylov, A. F.; Sonnenberg, J. L.; Williams-Young, D.; Ding, F.; Lipparini, F.; Egidi, F.; Goings, J.; Peng, B.; Petrone, A.; Henderson, T.; Ranasinghe, D.; Zakrzewski, V. G.; Gao, J.; Rega, N.; Zheng, G.; Liang, W.; Hada, M.; Ehara, M.; Toyota, K.; Fukuda, R.; Hasegawa, J.; Ishida, M.; Nakajima, T.; Honda, Y.; Kitao, O.; Nakai, H.; Vreven, T.; Throssell, K.; Montgomery, J. A. Jr., Peralta, J. E.; Ogliaro, F.; Bearpark, M. J.; Heyd, J. J.; Brothers, E. N.; Kudin, K. N.; Staroverov, V. N.; Keith, T. A.; Kobayashi, R.; Normand, J.; Raghavachari, K.; Rendell, A. P.; Burant, J. C.; Iyengar, S. S.; Tomasi, J.; Cossi, M.; Millam, J. M.; Klene, M.; Adamo, C.; Cammi, R.; Ochterski, J. W.; Martin, R. L.; Morokuma, K.; Farkas, O.; Foresman, J. B.; and Fox, D. J. Gaussian, Inc., Wallingford CT, 2016.
- [2] Yu, H. S.; He, X.; Li, S. L.; Truhlar, D. G. MN15: A Kohn-Sham Global-Hybrid Exchange-Correlation Density Functional with Broad Accuracy for Multi-Reference and Single-Reference Systems and Noncovalent Interactions. *Chem. Sci.* **2016**, *7*, 5032-5051.
- [3] (a) Schaefer, H. F. *Methods of Electronic Structure Theory*; Plenum Press: New York, USA, **1977**. (b) Andrae, D., Häußermann, U., Dolg, M., Stoll, H., Preuß, H. Energy-Adjusted ab initio Pseudopotentials for the Second and Third Row Transition Elements. *Theoret. Chim. Acta.* **1990**, *77*, 123-141; (c) Igel-Mann, G., Stoll, H., Preuss, H. Pseudopotentials for main group elements (IIIA through VIIA). *Mol. Phys.* **1988**, *65*, 1321-28. (d) Szentpály, L. v., Fuentealba, P., Preuss, H., Stoll, H. Pseudopotential calculations on Rb<sup>+</sup>, Cs<sup>+</sup>, RbH<sup>+</sup>, CsH<sup>+</sup> and the mixed alkali dimer ions. *Chem. Phys. Lett.* **1982**, *93*, 555-59.
- [4] (a) Ditchfield, R., Hehre, W. J., Pople, J. A. Self-Consistent Molecular-Orbital Methods. IX. An Extended Gaussian-Type Basis for Molecular-Orbital Studies of Organic Molecules. *J. Chem. Phys.* **1971**, *54*, 724-728; (b) Hehre, W. J., Ditchfield, R., Pople, J. A. Self-Consistent Molecular Orbital Methods. XII. Further Extensions of Gaussian-Type Basis Sets for Use in Molecular Orbital Studies of Organic Molecules. *J. Chem. Phys.* **1972**, *56*, 2257-2261; (c) Hariharan, P. C., Pople, J. A. The Influence of Polarization Functions on Molecular Orbital Hydrogenation Energies. *Theor. Chim. Acta.* **1973**, *28*, 213-222; (d) Gordon, M. S., Binkley, J. S., Pople, J. A., Pietro, W. J., Hehre, W. J. Self-consistent molecular-orbital methods. 22. Small split-valence basis sets for second-row elements. *J. Am. Chem. Soc.* **1982**, *104*, 2797-2803; (e) Francl, M. M., Pietro, W. J., Hehre, W. J., Binkley, J. S., Gordon, M. S., DeFrees, D. J., Pople, J. A. Self-consistent molecular orbital methods. XXIII. A polarization-type basis set for second-row elements. *J. Chem. Phys.* **1982**, *77*, 3654-3665.
- [5] (a) Marenich, A. V., Cramer, C. J., Truhlar, D. G. Universal Solvation Model Based on Solute Electron Density and on a Continuum Model of the Solvent Defined by the Bulk Dielectric Constant and Atomic Surface Tensions. *J. Phys. Chem. B.* **2009**, *113*, 6378-6396; (b) Weigend, F., Ahlrichs,



R. Balanced Basis Sets of Split Valence, Triple Zeta Valence and Quadruple Zeta Valence Quality for H to Rn: Design and Assessment of Accuracy. *Phys. Chem. Chem. Phys.* **2005**, *7*, 3297-3305; (c) Andrae, D., Häußermann, U., Dolg, M., Stoll, H., Preuß, H. Energy-adjusted ab initio pseudopotentials for the second and third row transition elements. *Theor. Chim. Acta.* **1990**, *77*, 123-141; (d) Leininger, T., Nicklass, A., Küchle, W., Stoll, H., Dolg, M., Bergner, A. The accuracy of the pseudopotential approximation: non-frozen-core effects for spectroscopic constants of alkali fluorides XF (X = K, Rb, Cs). *Chem. Phys. Lett.* **1996**, *255*, 274-280; (e) Krishnan, R., Binkley, J. S., Seeger, R., Pople, J. A. Self-Consistent Molecular Orbital Methods. XX. A Basis Set for Correlated Wave Functions. *J. Chem. Phys.* **1980**, *72*, 650-654; (f) Clark, T., Chandrasekhar, J., Spitznagel, G. W., Schleyer, P. V. R. Efficient Diffuse Function-Augmented Basis Sets for Anion Calculations. III. The 3-21+G Basis Set for First-Row Elements, Li–F. *J. Comp. Chem.* **1983**, *4*, 294-301; (g) McLean, A. D., Chandler, G. S. Contracted Gaussian basis sets for molecular calculations. I. Second row atoms, Z=11-18. *J. Chem. Phys.* **1980**, *72*, 5639-5648; (h) Francl, M. M., Pietro, W. J., Hehre, W. J., Binkley, J. S., Gordon, M. S., DeFrees, D. J., Pople, J. A. Self-consistent molecular orbital methods. XXIII. A polarization-type basis set for second-row elements. *J. Chem. Phys.* **1982**, *77*, 3654-3665; (i) Spitznagel, G. W., Clark, T., von Ragué Schleyer, P., Hehre, W. J. An evaluation of the performance of diffuse function-augmented basis sets for second row elements, Na-Cl. *J. Comput. Chem.* **1987**, *8*, 1109-1116; (j) The basis sets were obtained from the Basis Set Exchange library at <https://www.basissetexchange.org>.

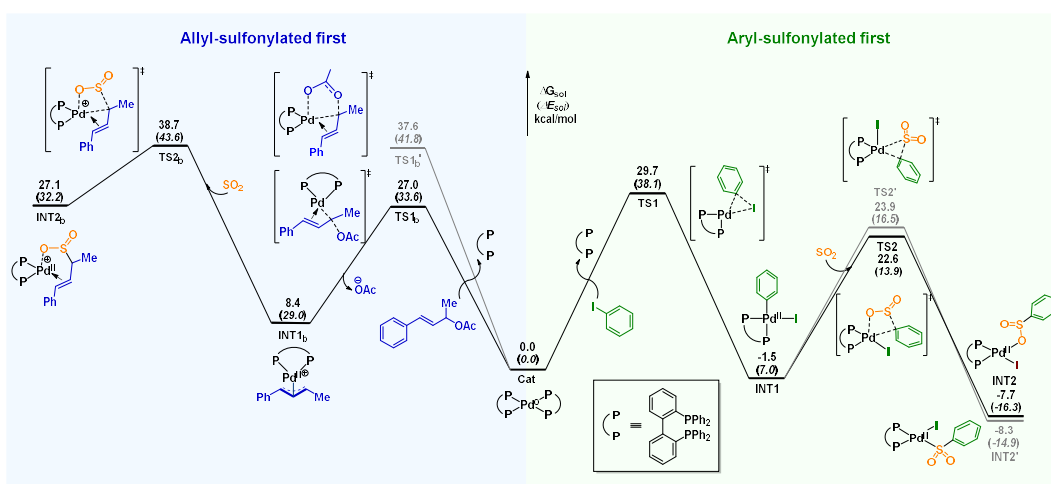

**Figure S3.** The DFT studies of allyl-sulfonylated first (left) and aryl-sulfonylated first (right) by Pd Catalyst. Relative free energies (electronic energies) are in kcal/mol at 353 K and 1 atm.

**Table S2.** Listed are the zero-point vibrational energy correction (cZPE), enthalpy correction (cH), Gibbs free energy correction (cG) and imaginary frequencies (IF) determined in the gas-phase

geometries at 353 K and 1 atm. Single-point solvent (n,n-dimethylformamide) corrected SCF Done energies (E) are also presented. All energies values are given in Hartree.

| Geometry         | cZPE <sub>353, gas</sub> | cH <sub>353, gas</sub> | cG <sub>353, gas</sub> | E <sub>0, sol</sub> | IF       |
|------------------|--------------------------|------------------------|------------------------|---------------------|----------|
| OAc              | 0.048552                 | 0.055367               | 0.014662               | -228.438375         | -        |
| P_ligand         | 0.529418                 | 0.575252               | 0.440302               | -2069.826232        | -        |
| cinnamyl_acetate | 0.233719                 | 0.253874               | 0.178953               | -615.592189         | -        |
| Phi              | 0.090533                 | 0.099638               | 0.051465               | -528.398678         | -        |
| Cat              | 1.063503                 | 1.156625               | 0.927562               | -4267.483608        | -        |
| TS1              | 0.621046                 | 0.678283               | 0.521788               | -2725.991718        | -74.097  |
| INT1             | 0.623492                 | 0.680962               | 0.524061               | -2726.043839        | -        |
| TS1b'            | 0.763845                 | 0.831466               | 0.655557               | -2813.179026        | -261.574 |
| TS1b             | 0.763502                 | 0.831650               | 0.651337               | -2813.191669        | -186.482 |
| INT1b            | 0.713894                 | 0.774965               | 0.613442               | -2584.759652        | -        |
| TS2              | 0.632852                 | 0.694305               | 0.531265               | -3274.448915        | -151.888 |
| TS2'             | 0.632966                 | 0.694646               | 0.529537               | -3274.44501         | -189.083 |
| INT2             | 0.634734                 | 0.696091               | 0.533014               | -3274.498901        | -        |
| INT2'            | 0.634528                 | 0.696424               | 0.529761               | -3274.496594        | -        |
| TS2b             | 0.722756                 | 0.788044               | 0.617842               | -3133.152113        | -192.048 |
| INT2b            | 0.724559                 | 0.790054               | 0.619237               | -3133.17199         | -        |
| INT3             | 0.585692                 | 0.642227               | 0.488362               | -2722.974221        | -        |
| INT4             | 0.098213                 | 0.109668               | 0.057060               | -779.962497         | -        |
| INT5             | 0.813791                 | 0.887141               | 0.698512               | -3364.73786         | -        |
| TS3              | 0.812869                 | 0.885969               | 0.693672               | -3364.713385        | -133.088 |
| TS3'             | 0.812745                 | 0.885504               | 0.698118               | -3364.705912        | -87.564  |
| INT6             | 0.815686                 | 0.888194               | 0.699510               | -3364.743961        | -        |
| Prd              | 0.283005                 | 0.308014               | 0.221082               | -1167.110803        | -        |

**Table S3.** Cartesian coordinates (in Å) of related structures which were calculated at the M N15/6-31G(d,p)+SDD(Pd) level of theory

|                  |           |           |           |   |           |           |           |
|------------------|-----------|-----------|-----------|---|-----------|-----------|-----------|
| <b>OAc anion</b> |           |           |           | C | 1.762668  | -2.375651 | -0.499014 |
| O                | 0.688921  | 1.166683  | -0.000133 | C | 1.280965  | -3.306710 | -1.422746 |
| C                | 0.218674  | 0.002120  | 0.000264  | C | 0.306305  | -2.936394 | -2.346755 |
| O                | 0.805885  | -1.106535 | -0.000130 | C | -0.186946 | -1.631594 | -2.341587 |
| C                | -1.346311 | -0.057585 | 0.000058  | C | -0.278669 | 0.692487  | -1.414238 |
| H                | -1.737640 | 0.469460  | 0.880274  | C | -1.268492 | 1.067340  | -0.483552 |
| H                | -1.737522 | 0.470828  | -0.879385 | C | -1.762336 | 2.374502  | -0.502795 |
| H                | -1.717465 | -1.088682 | -0.000717 | C | -1.280685 | 3.303904  | -1.428219 |
|                  |           |           |           | C | -0.306305 | 2.931842  | -2.351826 |
| <b>P_ligand</b>  |           |           |           | C | 0.186777  | 1.626989  | -2.344500 |
| C                | 0.278575  | -0.695422 | -1.413044 | H | 2.530167  | -2.671414 | 0.211851  |
| C                | 1.268597  | -1.068543 | -0.481871 | H | 1.674789  | -4.320021 | -1.419712 |

|   |           |           |           |                         |           |           |           |
|---|-----------|-----------|-----------|-------------------------|-----------|-----------|-----------|
| H | -0.076162 | -3.658158 | -3.063507 | H                       | -2.226366 | -3.090607 | 0.456215  |
| H | -0.969590 | -1.334981 | -3.037298 | C                       | -4.309948 | -1.490517 | -2.395930 |
| H | -2.529619 | 2.671592  | 0.207754  | H                       | -3.659180 | 0.402590  | -1.584543 |
| H | -1.674320 | 4.317291  | -1.426812 | C                       | -4.247483 | -2.881275 | -2.276075 |
| H | 0.076098  | 3.652315  | -3.069909 | H                       | -3.456672 | -4.541614 | -1.150451 |
| H | 0.969242  | 1.329067  | -3.039850 | H                       | -4.883707 | -1.038279 | -3.200921 |
| P | 1.852576  | 0.240562  | 0.715382  | H                       | -4.770708 | -3.511746 | -2.990500 |
| P | -1.852564 | -0.239664 | 0.715946  |                         |           |           |           |
| C | 2.883469  | 1.255575  | -0.450928 |                         |           |           |           |
| C | 2.831380  | 2.647745  | -0.336543 | <b>cinnamyl_acetate</b> |           |           |           |
| C | 3.628926  | 0.679463  | -1.487744 | C                       | -0.303325 | 0.504088  | 0.062352  |
| C | 3.510317  | 3.458090  | -1.248104 | C                       | 0.708076  | -0.034850 | -0.629436 |
| H | 2.225946  | 3.091158  | 0.451216  | H                       | -0.142755 | 0.970346  | 1.035199  |
| C | 4.308902  | 1.486957  | -2.399079 | H                       | 0.477100  | -0.511274 | -1.584852 |
| H | 3.658523  | -0.404983 | -1.584652 | C                       | -1.710413 | 0.545341  | -0.449430 |
| C | 4.246350  | 2.877890  | -2.281298 | H                       | -1.805158 | -0.046146 | -1.367480 |
| H | 3.455687  | 4.539855  | -1.157973 | C                       | 2.128350  | -0.075879 | -0.242005 |
| H | 4.882470  | 1.033559  | -3.203555 | C                       | 3.010247  | -0.867730 | -0.992162 |
| H | 4.769322  | 3.507330  | -2.996816 | C                       | 2.643304  | 0.644530  | 0.848219  |
| C | 3.100022  | -0.703539 | 1.709160  | C                       | 4.360848  | -0.953708 | -0.659307 |
| C | 4.484859  | -0.573665 | 1.570775  | H                       | 2.623423  | -1.424429 | -1.843745 |
| C | 2.589682  | -1.573487 | 2.684851  | C                       | 3.991021  | 0.559528  | 1.182776  |
| C | 5.345819  | -1.303898 | 2.394091  | H                       | 1.985809  | 1.285056  | 1.430783  |
| H | 4.893436  | 0.100437  | 0.822112  | C                       | 4.856087  | -0.241148 | 0.432091  |
| C | 3.448603  | -2.314140 | 3.493320  | H                       | 5.025510  | -1.575743 | -1.252889 |
| H | 1.509967  | -1.664773 | 2.800809  | H                       | 4.371833  | 1.125156  | 2.029154  |
| C | 4.831844  | -2.177570 | 3.350994  | H                       | 5.908787  | -0.302766 | 0.694261  |
| H | 6.421261  | -1.191476 | 2.281755  | C                       | -2.198243 | 1.968589  | -0.696699 |
| H | 3.040765  | -2.989981 | 4.240567  | H                       | -1.572898 | 2.453776  | -1.451479 |
| H | 5.504235  | -2.747102 | 3.987209  | H                       | -3.232093 | 1.950857  | -1.051390 |
| C | -3.099619 | 0.706418  | 1.708331  | H                       | -2.142057 | 2.550503  | 0.229161  |
| C | -2.588899 | 1.578266  | 2.682124  | O                       | -2.540588 | -0.063580 | 0.565462  |
| C | -4.484510 | 0.576426  | 1.570594  | C                       | -3.723935 | -0.552799 | 0.152257  |
| C | -3.447509 | 2.320581  | 3.489398  | O                       | -4.106996 | -0.499039 | -0.997333 |
| H | -1.509140 | 1.669701  | 2.797547  | C                       | -4.484426 | -1.167638 | 1.297458  |
| C | -5.345154 | 1.308348  | 2.392738  | H                       | -3.895519 | -1.975904 | 1.739527  |
| H | -4.893373 | -0.099082 | 0.823354  | H                       | -4.648887 | -0.418076 | 2.076367  |
| C | -4.830805 | 2.183839  | 3.347777  | H                       | -5.437975 | -1.550343 | 0.935678  |
| H | -3.039386 | 2.997863  | 4.235182  |                         |           |           |           |
| H | -6.420641 | 1.195815  | 2.280941  | <b>Phi</b>              |           |           |           |
| H | -5.502950 | 2.754674  | 3.983084  | I                       | -1.560493 | 0.000000  | -0.000001 |
| C | -2.883925 | -1.256322 | -0.448541 | C                       | 0.575986  | 0.000005  | 0.000000  |
| C | -2.831958 | -2.648326 | -0.332058 | C                       | 1.256302  | -1.215557 | 0.000001  |
| C | -3.629639 | -0.681709 | -1.486004 | C                       | 1.256305  | 1.215559  | 0.000001  |
| C | -3.511221 | -3.459982 | -1.242205 | C                       | 2.652347  | -1.207040 | 0.000002  |
|   |           |           |           | H                       | 0.709643  | -2.153520 | 0.000000  |

|            |           |           |           |    |           |           |           |
|------------|-----------|-----------|-----------|----|-----------|-----------|-----------|
| C          | 2.652356  | 1.207035  | 0.000002  | H  | 3.025405  | 3.415214  | -2.931348 |
| H          | 0.709660  | 2.153529  | 0.000001  | C  | -0.666751 | 4.446445  | -2.338784 |
| C          | 3.351312  | -0.000002 | 0.000003  | H  | -0.810175 | 2.610515  | -1.190908 |
| H          | 3.190789  | -2.150939 | 0.000003  | C  | 0.170852  | 5.256952  | -3.103119 |
| H          | 3.190795  | 2.150936  | 0.000003  | H  | 2.159121  | 5.514982  | -3.901020 |
| H          | 4.437610  | -0.000009 | 0.000003  | H  | -1.707786 | 4.718477  | -2.179811 |
| <b>Cat</b> |           |           |           | H  | -0.208392 | 6.177113  | -3.540471 |
| C          | 4.063637  | 0.718457  | 0.217253  | C  | 1.153373  | -2.874755 | 1.995943  |
| C          | 3.139429  | 1.693049  | -0.219039 | C  | -0.170327 | -3.265965 | 1.781563  |
| C          | 3.272773  | 3.009264  | 0.246424  | C  | 1.989717  | -3.697252 | 2.761898  |
| C          | 4.283051  | 3.369336  | 1.136002  | C  | -0.666550 | -4.446485 | 2.339030  |
| C          | 5.211310  | 2.415794  | 1.548453  | H  | -0.810011 | -2.610867 | 1.190649  |
| C          | 5.105096  | 1.113130  | 1.069654  | C  | 1.502179  | -4.882944 | 3.309167  |
| C          | 4.063547  | -0.718623 | -0.217471 | H  | 3.025328  | -3.414531 | 2.932098  |
| C          | 3.139356  | -1.693136 | 0.219018  | C  | 0.171014  | -5.256658 | 3.103769  |
| C          | 3.272593  | -3.009409 | -0.246323 | H  | -1.707512 | -4.718713 | 2.179908  |
| C          | 4.282693  | -3.369593 | -1.136050 | H  | 2.159157  | -5.514178 | 3.902165  |
| C          | 5.210916  | -2.416111 | -1.548740 | H  | -0.208195 | -6.176752 | 3.541293  |
| C          | 5.104852  | -1.113410 | -1.070011 | C  | 2.514996  | -0.420234 | 2.723034  |
| H          | 2.566479  | 3.764851  | -0.091287 | C  | 1.880606  | 0.682117  | 3.298191  |
| H          | 4.351245  | 4.395753  | 1.489123  | C  | 3.757960  | -0.830508 | 3.220604  |
| H          | 6.011066  | 2.679916  | 2.234897  | C  | 2.479143  | 1.378144  | 4.350428  |
| H          | 5.820110  | 0.356679  | 1.386500  | H  | 0.920884  | 1.000454  | 2.896696  |
| H          | 2.566352  | -3.764938 | 0.091627  | C  | 4.348646  | -0.151440 | 4.284744  |
| H          | 4.350789  | -4.396037 | -1.489110 | H  | 4.290092  | -1.650884 | 2.740444  |
| H          | 6.010533  | -2.680316 | -2.235313 | C  | 3.712283  | 0.958042  | 4.847727  |
| H          | 5.819869  | -0.357026 | -1.387010 | H  | 1.980642  | 2.249372  | 4.768750  |
| P          | 1.678882  | 1.236298  | -1.274339 | H  | 5.315553  | -0.474659 | 4.662995  |
| P          | 1.678888  | -1.236241 | 1.274351  | H  | 4.182964  | 1.496428  | 5.666548  |
| C          | 2.514981  | 0.420344  | -2.723053 | Pd | -0.000081 | 0.000028  | 0.000047  |
| C          | 1.880790  | -0.682225 | -3.298029 | P  | -1.678830 | -1.237201 | -1.273633 |
| C          | 3.757819  | 0.830833  | -3.220747 | P  | -1.678884 | 1.237159  | 1.273566  |
| C          | 2.479417  | -1.378246 | -4.350211 | C  | -3.139322 | -1.693321 | -0.217995 |
| H          | 0.921168  | -1.000700 | -2.896403 | C  | -2.514949 | -0.422166 | -2.722849 |
| C          | 4.348577  | 0.151786  | -4.284864 | C  | -1.153275 | -2.876197 | -1.994033 |
| H          | 4.289816  | 1.651359  | -2.740699 | C  | -3.139367 | 1.693197  | 0.217881  |
| C          | 3.712422  | -0.957902 | -4.847663 | C  | -1.153368 | 2.876207  | 1.993890  |
| H          | 1.981098  | -2.249644 | -4.768393 | C  | -2.515082 | 0.422176  | 2.722771  |
| H          | 5.315384  | 0.475171  | -4.663228 | C  | -4.063498 | -0.718471 | 0.217807  |
| H          | 4.183163  | -1.496271 | -5.666460 | C  | -3.272593 | -3.009260 | 0.248260  |
| C          | 1.153335  | 2.874885  | -1.995717 | C  | -1.880788 | 0.680035  | -3.298559 |
| C          | 1.989717  | 3.697719  | -2.761284 | C  | -3.757762 | -0.833044 | -3.220280 |
| C          | -0.170469 | 3.265850  | -1.781532 | C  | -1.989578 | -3.699405 | -2.759281 |
| C          | 1.502115  | 4.883484  | -3.308334 | C  | 0.170469  | -3.267129 | -1.779402 |
|            |           |           |           | C  | -4.063518 | 0.718322  | -0.217886 |

|   |           |           |           |     |           |           |           |
|---|-----------|-----------|-----------|-----|-----------|-----------|-----------|
| C | -3.272665 | 3.009126  | -0.248406 | H   | -6.010572 | -2.678721 | 2.236962  |
| C | 0.170475  | 3.266964  | 1.779554  | H   | -4.183186 | 1.492434  | -5.667525 |
| C | -1.989786 | 3.699599  | 2.758812  | H   | 0.208495  | -6.179394 | -3.536683 |
| C | -1.881066 | -0.680144 | 3.298411  | H   | -6.010672 | 2.678491  | -2.237048 |
| C | -3.757865 | 0.833146  | 3.220199  | H   | 0.208413  | 6.179337  | 3.536653  |
| C | -5.104811 | -1.112640 | 1.070611  | H   | -4.183604 | -1.492448 | 5.667285  |
| C | -4.282727 | -3.368805 | 1.138216  |     |           |           |           |
| H | -2.566343 | -3.765043 | -0.089106 | TS1 |           |           |           |
| C | -2.479438 | 1.375335  | -4.351204 | C   | 1.574976  | 2.465946  | -0.514520 |
| H | -0.921177 | 0.998795  | -2.897139 | C   | 2.047247  | 1.260866  | -1.072460 |
| C | -4.348548 | -0.154718 | -4.284841 | C   | 2.379693  | 1.224486  | -2.435070 |
| H | -4.289719 | -1.653280 | -2.739688 | C   | 2.293806  | 2.362180  | -3.232732 |
| C | -1.501960 | -4.885513 | -3.305576 | C   | 1.875433  | 3.569117  | -2.672785 |
| H | -3.025215 | -3.416924 | -2.929709 | C   | 1.526725  | 3.610131  | -1.326842 |
| C | 0.666765  | -4.448075 | -2.335897 | C   | 1.097702  | 2.641668  | 0.897811  |
| H | 0.810131  | -2.611517 | -1.189040 | C   | -0.173262 | 2.217187  | 1.343014  |
| C | -5.104869 | 1.112461  | -1.070669 | C   | -0.572553 | 2.511049  | 2.652035  |
| C | -4.282801 | 3.368631  | -1.138364 | C   | 0.271036  | 3.195845  | 3.525347  |
| H | -2.566429 | 3.764923  | 0.088953  | C   | 1.528174  | 3.612218  | 3.091386  |
| C | 0.666775  | 4.447880  | 2.336110  | C   | 1.922012  | 3.349405  | 1.781381  |
| H | 0.810187  | 2.611226  | 1.189377  | H   | 2.702770  | 0.284150  | -2.875894 |
| C | -1.502167 | 4.885686  | 3.305151  | H   | 2.553700  | 2.303524  | -4.286378 |
| H | -3.025532 | 3.417304  | 2.928900  | H   | 1.802731  | 4.466386  | -3.281199 |
| C | -2.479813 | -1.375445 | 4.351009  | H   | 1.164734  | 4.535617  | -0.884229 |
| H | -0.921499 | -0.999025 | 2.896978  | H   | -1.555801 | 2.198188  | 2.993419  |
| C | -4.348744 | 0.154821  | 4.284706  | H   | -0.058675 | 3.406700  | 4.539334  |
| H | -4.289747 | 1.653454  | 2.739654  | H   | 2.198001  | 4.140539  | 3.764369  |
| C | -5.210926 | -2.415017 | 1.550231  | H   | 2.899174  | 3.671337  | 1.427846  |
| H | -5.819797 | -0.356018 | 1.387108  | P   | 2.001400  | -0.339198 | -0.138779 |
| H | -4.350863 | -4.395009 | 1.491965  | P   | -1.218829 | 1.148720  | 0.244926  |
| C | -3.712432 | 0.954622  | -4.848369 | C   | 2.678132  | 0.061319  | 1.538947  |
| H | -1.981155 | 2.246477  | -4.769965 | C   | 1.869725  | -0.188913 | 2.650790  |
| H | -5.315342 | -0.478390 | -4.662994 | C   | 3.948293  | 0.620137  | 1.713362  |
| C | -0.170762 | -5.258961 | -3.099915 | C   | 2.324335  | 0.132405  | 3.931247  |
| H | -2.158911 | -5.517285 | -3.898031 | H   | 0.880297  | -0.622583 | 2.495790  |
| H | 1.707754  | -4.720085 | -2.176590 | C   | 4.403562  | 0.935273  | 2.992125  |
| C | -5.211007 | 2.414816  | -1.550327 | H   | 4.578638  | 0.818412  | 0.849037  |
| H | -5.819861 | 0.355823  | -1.387114 | C   | 3.589469  | 0.694184  | 4.101605  |
| H | -4.350957 | 4.394821  | -1.492148 | H   | 1.689184  | -0.054856 | 4.793089  |
| C | -0.170854 | 5.258926  | 3.099847  | H   | 5.390991  | 1.370183  | 3.124497  |
| H | 1.707840  | 4.719747  | 2.177059  | H   | 3.943623  | 0.943691  | 5.098608  |
| H | -2.159207 | 5.517609  | 3.897344  | C   | 3.332752  | -1.390223 | -0.882121 |
| C | -3.712765 | -0.954626 | 4.848184  | C   | 4.558930  | -0.896135 | -1.345578 |
| H | -1.981638 | -2.246680 | 4.769704  | C   | 3.086752  | -2.767067 | -0.922402 |
| H | -5.315507 | 0.478583  | 4.662860  | C   | 5.526374  | -1.770991 | -1.838329 |

|      |           |           |           |   |           |           |           |
|------|-----------|-----------|-----------|---|-----------|-----------|-----------|
| H    | 4.747980  | 0.175797  | -1.345450 | C | 1.847621  | 1.774617  | -0.750672 |
| C    | 4.060058  | -3.643064 | -1.405729 | C | 2.530542  | 2.036788  | -1.943715 |
| H    | 2.123552  | -3.137915 | -0.569318 | C | 2.485772  | 3.298017  | -2.536357 |
| C    | 5.279402  | -3.145283 | -1.864638 | C | 1.769360  | 4.324891  | -1.926367 |
| H    | 6.473007  | -1.380229 | -2.202467 | C | 1.109291  | 4.078265  | -0.725035 |
| H    | 3.862110  | -4.711319 | -1.429377 | C | 0.407029  | 2.662468  | 1.177634  |
| H    | 6.035513  | -3.825161 | -2.248441 | C | -0.789142 | 1.943183  | 1.375153  |
| C    | -2.857125 | 1.016534  | 1.081105  | C | -1.370464 | 1.921005  | 2.648895  |
| C    | -2.938897 | 0.139391  | 2.173755  | C | -0.777467 | 2.574936  | 3.726458  |
| C    | -4.027272 | 1.586646  | 0.571376  | C | 0.405468  | 3.286167  | 3.537630  |
| C    | -4.169705 | -0.150137 | 2.758044  | C | 0.972406  | 3.339763  | 2.268301  |
| H    | -2.031832 | -0.346181 | 2.534537  | H | 3.103983  | 1.245948  | -2.418070 |
| C    | -5.262986 | 1.282005  | 1.148307  | H | 3.017732  | 3.474893  | -3.467264 |
| H    | -3.978576 | 2.251363  | -0.287218 | H | 1.725741  | 5.312502  | -2.377393 |
| C    | -5.337450 | 0.417363  | 2.239907  | H | 0.545625  | 4.870161  | -0.236170 |
| H    | -4.219965 | -0.835815 | 3.599629  | H | -2.304449 | 1.390226  | 2.803175  |
| H    | -6.169467 | 1.720873  | 0.739310  | H | -1.246066 | 2.531804  | 4.705741  |
| H    | -6.301252 | 0.178321  | 2.681379  | H | 0.882426  | 3.798914  | 4.368234  |
| C    | -1.511335 | 2.219133  | -1.227580 | H | 1.896586  | 3.889088  | 2.103846  |
| C    | -1.350972 | 1.655014  | -2.495612 | P | 1.829832  | 0.061404  | -0.029896 |
| C    | -1.830073 | 3.576853  | -1.097462 | P | -1.540495 | 0.908502  | 0.023796  |
| C    | -1.507211 | 2.450381  | -3.633504 | C | 2.468141  | 0.346454  | 1.674184  |
| H    | -1.086393 | 0.599668  | -2.575486 | C | 1.810225  | -0.258359 | 2.748435  |
| C    | -1.985959 | 4.367598  | -2.234432 | C | 3.535539  | 1.222910  | 1.906424  |
| H    | -1.938303 | 4.009053  | -0.102901 | C | 2.219134  | 0.017959  | 4.054773  |
| C    | -1.821205 | 3.802994  | -3.502927 | H | 0.979763  | -0.935616 | 2.550591  |
| H    | -1.375019 | 2.012740  | -4.619602 | C | 3.948338  | 1.486862  | 3.211045  |
| H    | -2.230461 | 5.422088  | -2.134390 | H | 4.023827  | 1.711575  | 1.063765  |
| H    | -1.937257 | 4.421644  | -4.389325 | C | 3.285395  | 0.887451  | 4.285192  |
| Pd   | -0.269059 | -1.061294 | -0.255292 | H | 1.703294  | -0.446999 | 4.890417  |
| I    | -1.412499 | -3.346234 | 1.052401  | H | 4.778551  | 2.164867  | 3.391150  |
| C    | -1.908446 | -2.194221 | -0.869027 | H | 3.601870  | 1.099964  | 5.303123  |
| C    | -1.158497 | -2.573098 | -2.005627 | C | 3.159590  | -0.794753 | -0.978582 |
| C    | -3.193191 | -1.618054 | -1.000531 | C | 4.457384  | -0.963145 | -0.496819 |
| C    | -1.652235 | -2.220995 | -3.280313 | C | 2.813441  | -1.299149 | -2.239375 |
| H    | -0.275394 | -3.198255 | -1.907057 | C | 5.408787  | -1.623756 | -1.278383 |
| C    | -3.649189 | -1.296350 | -2.266735 | H | 4.725354  | -0.601928 | 0.492068  |
| H    | -3.780655 | -1.389557 | -0.114342 | C | 3.767597  | -1.939988 | -3.024107 |
| C    | -2.875940 | -1.583234 | -3.411318 | H | 1.783487  | -1.209567 | -2.585961 |
| H    | -1.079101 | -2.496656 | -4.162496 | C | 5.068570  | -2.104925 | -2.541101 |
| H    | -4.614484 | -0.807037 | -2.373640 | H | 6.415437  | -1.764674 | -0.894131 |
| H    | -3.259315 | -1.335033 | -4.397306 | H | 3.491183  | -2.333183 | -3.998391 |
|      |           |           |           | H | 5.810835  | -2.619653 | -3.145289 |
| INT1 |           |           |           | C | -3.326996 | 0.713526  | 0.462887  |
| C    | 1.120050  | 2.809337  | -0.131800 | C | -3.650098 | -0.186687 | 1.487619  |

|       |           |           |           |   |           |           |           |
|-------|-----------|-----------|-----------|---|-----------|-----------|-----------|
| C     | -4.354133 | 1.329174  | -0.256545 | C | -1.116927 | 4.634310  | -1.228102 |
| C     | -4.980015 | -0.449807 | 1.802512  | C | -1.166227 | 4.007111  | 0.014520  |
| H     | -2.852823 | -0.716428 | 2.005466  | H | -1.875552 | -0.184249 | 3.580760  |
| C     | -5.687742 | 1.060937  | 0.059101  | H | -0.840295 | 1.138555  | 5.381292  |
| H     | -4.126129 | 1.998768  | -1.079763 | H | 0.400950  | 3.235036  | 4.829283  |
| C     | -6.003070 | 0.175055  | 1.086781  | H | 0.554070  | 3.970821  | 2.462040  |
| H     | -5.214808 | -1.164977 | 2.585851  | H | 1.181184  | 2.629819  | -2.723451 |
| H     | -6.479174 | 1.539935  | -0.511077 | H | -0.224759 | 4.609723  | -3.193615 |
| H     | -7.041909 | -0.040863 | 1.321300  | H | -1.739488 | 5.503668  | -1.421515 |
| C     | -1.534041 | 2.008706  | -1.452725 | H | -1.833526 | 4.377737  | 0.789714  |
| C     | -0.994019 | 1.545964  | -2.654090 | P | -1.828748 | 0.024343  | 0.604576  |
| C     | -2.039845 | 3.312347  | -1.367038 | P | 1.445297  | 0.831362  | -0.415211 |
| C     | -0.964908 | 2.383701  | -3.771473 | C | -2.978010 | 1.167669  | -0.268859 |
| H     | -0.581659 | 0.536827  | -2.697975 | C | -2.752032 | 1.442301  | -1.618597 |
| C     | -2.023263 | 4.140841  | -2.486405 | C | -3.988571 | 1.843232  | 0.426381  |
| H     | -2.434699 | 3.674016  | -0.418103 | C | -3.551642 | 2.375550  | -2.281047 |
| C     | -1.484006 | 3.675280  | -3.688785 | H | -1.925718 | 0.952177  | -2.131158 |
| H     | -0.534987 | 2.026363  | -4.703090 | C | -4.781931 | 2.778697  | -0.235720 |
| H     | -2.420002 | 5.150410  | -2.420408 | H | -4.139976 | 1.640764  | 1.486323  |
| H     | -1.463595 | 4.324248  | -4.560292 | C | -4.564223 | 3.042040  | -1.591342 |
| Pd    | -0.316903 | -1.111774 | -0.140409 | H | -3.369617 | 2.588640  | -3.331476 |
| I     | 0.935269  | -3.438719 | 0.114146  | H | -5.566697 | 3.303743  | 0.302811  |
| C     | -2.054281 | -2.122408 | -0.359719 | H | -5.182740 | 3.773001  | -2.106056 |
| C     | -2.873460 | -1.805738 | -1.452708 | C | -2.873386 | -1.281363 | 1.384701  |
| C     | -2.521164 | -3.061900 | 0.570818  | C | -4.224374 | -1.452736 | 1.075744  |
| C     | -4.138232 | -2.384490 | -1.596472 | C | -2.230047 | -2.227520 | 2.198700  |
| H     | -2.543134 | -1.070941 | -2.188967 | C | -4.929337 | -2.541175 | 1.596638  |
| C     | -3.786451 | -3.636970 | 0.430184  | H | -4.722211 | -0.749331 | 0.413846  |
| H     | -1.893588 | -3.347351 | 1.411768  | C | -2.940174 | -3.298103 | 2.737154  |
| C     | -4.603424 | -3.296066 | -0.649033 | H | -1.160530 | -2.123854 | 2.388468  |
| H     | -4.761137 | -2.112004 | -2.445880 | C | -4.295782 | -3.457177 | 2.434818  |
| H     | -4.130815 | -4.360032 | 1.166922  | H | -5.977935 | -2.671217 | 1.342425  |
| H     | -5.589307 | -3.741947 | -0.754932 | H | -2.433796 | -4.017606 | 3.375415  |
|       |           |           |           | H | -4.849582 | -4.299282 | 2.841134  |
| TS1b' |           |           |           | C | 2.714638  | 0.743816  | -1.751815 |
| C     | -0.520020 | 2.294632  | 1.674027  | C | 2.299175  | 0.189592  | -2.972468 |
| C     | -1.207198 | 1.101906  | 1.988120  | C | 4.060827  | 1.060980  | -1.550497 |
| C     | -1.322252 | 0.715371  | 3.327873  | C | 3.231543  | -0.026500 | -3.987151 |
| C     | -0.743724 | 1.467494  | 4.349898  | H | 1.257279  | -0.107270 | -3.105375 |
| C     | -0.057785 | 2.640478  | 4.043998  | C | 4.991258  | 0.824622  | -2.565021 |
| C     | 0.027444  | 3.053834  | 2.717080  | H | 4.393381  | 1.456883  | -0.594917 |
| C     | -0.398222 | 2.867229  | 0.290776  | C | 4.578917  | 0.282958  | -3.782599 |
| C     | 0.468728  | 2.377778  | -0.709516 | H | 2.906711  | -0.458266 | -4.930056 |
| C     | 0.516669  | 3.014958  | -1.953990 | H | 6.039738  | 1.058656  | -2.398901 |
| C     | -0.274655 | 4.132244  | -2.218628 | H | 5.306408  | 0.094521  | -4.567990 |

|      |           |           |           |   |           |           |           |
|------|-----------|-----------|-----------|---|-----------|-----------|-----------|
| C    | 2.367163  | 1.228158  | 1.128068  | C | 2.522771  | -3.417949 | 2.280369  |
| C    | 2.378684  | 0.291734  | 2.162422  | C | 2.159390  | -4.333834 | 1.295089  |
| C    | 2.995416  | 2.468816  | 1.296635  | C | 1.842427  | -3.877458 | 0.017746  |
| C    | 3.024861  | 0.590129  | 3.363683  | C | 1.476959  | -2.119397 | -1.693955 |
| H    | 1.868088  | -0.659085 | 2.019026  | C | 0.229841  | -1.568549 | -2.054399 |
| C    | 3.639550  | 2.764843  | 2.496355  | C | -0.021078 | -1.244535 | -3.392208 |
| H    | 2.958832  | 3.204106  | 0.493099  | C | 0.947209  | -1.455648 | -4.372964 |
| C    | 3.652025  | 1.824501  | 3.530871  | C | 2.175031  | -2.016746 | -4.026064 |
| H    | 3.033825  | -0.143196 | 4.165968  | C | 2.424206  | -2.356967 | -2.698238 |
| H    | 4.125609  | 3.728099  | 2.628703  | H | 2.859646  | -1.347134 | 2.748993  |
| H    | 4.151215  | 2.058168  | 4.467877  | H | 2.782817  | -3.758013 | 3.279130  |
| Pd   | 0.043377  | -1.060022 | -0.414493 | H | 2.123513  | -5.397035 | 1.515803  |
| O    | -0.681162 | -1.075633 | -3.112602 | H | 1.552858  | -4.581224 | -0.759328 |
| C    | -1.890518 | -1.353359 | -2.955944 | H | -0.982180 | -0.816043 | -3.665151 |
| O    | -2.372215 | -2.058127 | -2.002134 | H | 0.736344  | -1.187833 | -5.404740 |
| C    | -2.906016 | -0.859801 | -3.982262 | H | 2.937262  | -2.186676 | -4.781565 |
| H    | -3.846193 | -0.594465 | -3.492416 | H | 3.382056  | -2.786393 | -2.412673 |
| H    | -2.507008 | -0.004834 | -4.534223 | P | 2.077016  | 0.228646  | 0.384910  |
| H    | -3.110968 | -1.670001 | -4.690660 | P | -1.006797 | -1.126260 | -0.748745 |
| C    | -0.999407 | -3.515718 | -1.409571 | C | 3.086565  | 0.528519  | -1.119464 |
| C    | 0.012444  | -3.236063 | -0.466979 | C | 2.516537  | 1.268427  | -2.159495 |
| C    | 1.283346  | -2.678390 | -0.852519 | C | 4.365331  | -0.023219 | -1.265659 |
| H    | -0.164310 | -3.577302 | 0.553174  | C | 3.228583  | 1.459796  | -3.345478 |
| H    | 1.480695  | -2.612937 | -1.926645 | H | 1.508612  | 1.668372  | -2.040346 |
| C    | 2.488688  | -2.718063 | 0.004621  | C | 5.075544  | 0.174768  | -2.448138 |
| C    | 3.702933  | -2.224276 | -0.505388 | H | 4.788642  | -0.621901 | -0.459555 |
| C    | 2.470265  | -3.174859 | 1.334861  | C | 4.504741  | 0.914684  | -3.487719 |
| C    | 4.835418  | -2.131069 | 0.299472  | H | 2.782006  | 2.026941  | -4.157351 |
| H    | 3.742408  | -1.886954 | -1.540356 | H | 6.068182  | -0.252417 | -2.563866 |
| C    | 3.610348  | -3.101670 | 2.132815  | H | 5.056736  | 1.062302  | -4.412256 |
| H    | 1.550664  | -3.576497 | 1.755231  | C | 2.935008  | 1.078409  | 1.780561  |
| C    | 4.796165  | -2.565080 | 1.626296  | C | 4.183631  | 1.692233  | 1.662050  |
| H    | 5.751984  | -1.718871 | -0.116457 | C | 2.215415  | 1.200177  | 2.979715  |
| H    | 3.570897  | -3.460391 | 3.158915  | C | 4.709240  | 2.418152  | 2.734316  |
| H    | 5.680315  | -2.496281 | 2.254271  | H | 4.738624  | 1.624544  | 0.730117  |
| C    | -2.150982 | -4.386572 | -1.013345 | C | 2.750780  | 1.906415  | 4.053970  |
| H    | -2.604058 | -4.003613 | -0.091855 | H | 1.220283  | 0.756212  | 3.048138  |
| H    | -2.913159 | -4.422642 | -1.790191 | C | 3.999100  | 2.522709  | 3.928983  |
| H    | -1.776191 | -5.399310 | -0.813650 | H | 5.675118  | 2.905170  | 2.630756  |
| H    | -0.704833 | -3.476091 | -2.455750 | H | 2.188306  | 1.993958  | 4.979611  |
|      |           |           |           | H | 4.410410  | 3.090724  | 4.758921  |
| TS1b |           |           |           | C | -2.574068 | -0.720292 | -1.626121 |
| C    | 1.840887  | -2.511468 | -0.291980 | C | -2.690273 | 0.590090  | -2.108424 |
| C    | 2.219359  | -1.590684 | 0.707297  | C | -3.668176 | -1.587967 | -1.693945 |
| C    | 2.562796  | -2.056655 | 1.980987  | C | -3.896065 | 1.041944  | -2.641455 |



|    |           |           |           |       |           |           |           |
|----|-----------|-----------|-----------|-------|-----------|-----------|-----------|
| H  | -1.868542 | 1.299967  | -2.009893 | H     | -4.057732 | 5.645320  | -1.155545 |
| C  | -4.873299 | -1.136242 | -2.236640 | H     | -0.449885 | 3.070862  | -0.650950 |
| H  | -3.593551 | -2.597899 | -1.298643 |       |           |           |           |
| C  | -4.990187 | 0.175117  | -2.704000 | INT1b |           |           |           |
| H  | -3.959315 | 2.081311  | -2.950120 | C     | 1.281307  | -1.792422 | 1.709180  |
| H  | -5.727362 | -1.807401 | -2.279796 | C     | 1.798401  | -0.483166 | 1.683375  |
| H  | -5.939362 | 0.523917  | -3.102901 | C     | 2.088938  | 0.174478  | 2.883474  |
| C  | -1.304660 | -2.693993 | 0.160322  | C     | 1.852567  | -0.446774 | 4.109329  |
| C  | -1.365753 | -2.649562 | 1.554910  | C     | 1.339859  | -1.742228 | 4.142805  |
| C  | -1.430630 | -3.915753 | -0.512229 | C     | 1.074868  | -2.409970 | 2.948877  |
| C  | -1.548751 | -3.829338 | 2.278872  | C     | 1.001062  | -2.595682 | 0.476184  |
| H  | -1.267111 | -1.691273 | 2.063969  | C     | -0.114552 | -2.397047 | -0.362945 |
| C  | -1.612240 | -5.091616 | 0.213399  | C     | -0.308161 | -3.241301 | -1.461885 |
| H  | -1.365588 | -3.940697 | -1.599721 | C     | 0.600247  | -4.258605 | -1.753195 |
| C  | -1.666952 | -5.047550 | 1.609736  | C     | 1.707867  | -4.456049 | -0.931514 |
| H  | -1.599440 | -3.791340 | 3.363903  | C     | 1.888926  | -3.639172 | 0.182177  |
| H  | -1.707354 | -6.041535 | -0.306282 | H     | 2.507014  | 1.176735  | 2.864881  |
| H  | -1.805223 | -5.966068 | 2.174347  | H     | 2.080207  | 0.078708  | 5.032309  |
| Pd | -0.222446 | 0.798172  | 0.412300  | H     | 1.153622  | -2.235747 | 5.092309  |
| C  | -0.161720 | 3.228246  | 0.388114  | H     | 0.679034  | -3.422762 | 2.962364  |
| C  | -0.944689 | 2.607858  | 1.383260  | H     | -1.181402 | -3.114949 | -2.094453 |
| C  | -2.025987 | 1.772576  | 0.973597  | H     | 0.431331  | -4.899955 | -2.613431 |
| H  | -0.670162 | 2.747966  | 2.429079  | H     | 2.420850  | -5.246561 | -1.146849 |
| H  | -2.509475 | 2.048044  | 0.033172  | H     | 2.744816  | -3.786221 | 0.836923  |
| C  | -2.785352 | 0.891443  | 1.882964  | P     | 2.003508  | 0.380055  | 0.061611  |
| C  | -2.348973 | 0.591219  | 3.186735  | P     | -1.242502 | -0.946675 | -0.088121 |
| C  | -3.936092 | 0.243855  | 1.399102  | C     | 3.134222  | -0.677238 | -0.916492 |
| C  | -3.030654 | -0.337276 | 3.971061  | C     | 2.772298  | -1.019333 | -2.222370 |
| H  | -1.457511 | 1.076995  | 3.580168  | C     | 4.292969  | -1.211416 | -0.339308 |
| C  | -4.604477 | -0.697990 | 2.177895  | C     | 3.572035  | -1.897264 | -2.955879 |
| H  | -4.287555 | 0.476349  | 0.394612  | H     | 1.850682  | -0.616783 | -2.644306 |
| C  | -4.154659 | -0.996192 | 3.466365  | C     | 5.092001  | -2.082577 | -1.077181 |
| H  | -2.679688 | -0.553173 | 4.977464  | H     | 4.553044  | -0.957904 | 0.687789  |
| H  | -5.482634 | -1.198289 | 1.777375  | C     | 4.728610  | -2.426815 | -2.382579 |
| H  | -4.679138 | -1.728429 | 4.074442  | H     | 3.289199  | -2.172770 | -3.967789 |
| C  | 1.113197  | 3.951577  | 0.693499  | H     | 5.992749  | -2.498617 | -0.634908 |
| H  | 1.938593  | 3.558147  | 0.086672  | H     | 5.349449  | -3.112498 | -2.952305 |
| H  | 0.968248  | 5.003780  | 0.434928  | C     | 2.864093  | 1.960790  | 0.442689  |
| H  | 1.388576  | 3.866710  | 1.750551  | C     | 4.183334  | 2.217928  | 0.066888  |
| O  | -1.362948 | 5.029691  | -0.170228 | C     | 2.098608  | 2.972256  | 1.045037  |
| C  | -2.123071 | 4.712762  | -1.135742 | C     | 4.732385  | 3.484860  | 0.285412  |
| O  | -2.185973 | 3.591022  | -1.707045 | H     | 4.776394  | 1.442467  | -0.411589 |
| C  | -3.079636 | 5.802789  | -1.623609 | C     | 2.655707  | 4.226989  | 1.280536  |
| H  | -2.718056 | 6.794106  | -1.343443 | H     | 1.060254  | 2.769063  | 1.318055  |
| H  | -3.212002 | 5.730371  | -2.706081 | C     | 3.973928  | 4.485696  | 0.890982  |

|    |           |           |           |     |           |           |           |
|----|-----------|-----------|-----------|-----|-----------|-----------|-----------|
| H  | 5.755522  | 3.686527  | -0.018440 | H   | 1.968552  | 3.879419  | -1.580185 |
| H  | 2.063744  | 5.004904  | 1.754566  | H   | 0.368031  | 1.758351  | -3.202763 |
| H  | 4.406150  | 5.467681  | 1.060022  |     |           |           |           |
| C  | -2.750826 | -1.255937 | -1.102615 | TS2 |           |           |           |
| C  | -2.636151 | -1.132002 | -2.496098 | C   | -0.594409 | 2.861181  | 1.017699  |
| C  | -4.000381 | -1.514434 | -0.535471 | C   | -1.366210 | 1.732918  | 1.362038  |
| C  | -3.751855 | -1.293279 | -3.314403 | C   | -1.769444 | 1.551054  | 2.689308  |
| H  | -1.663651 | -0.903620 | -2.935602 | C   | -1.431306 | 2.480522  | 3.671651  |
| C  | -5.121862 | -1.660366 | -1.357086 | C   | -0.697078 | 3.614753  | 3.331102  |
| H  | -4.109146 | -1.582603 | 0.543145  | C   | -0.291284 | 3.800418  | 2.011849  |
| C  | -5.000490 | -1.555949 | -2.741752 | C   | -0.071625 | 3.122620  | -0.357749 |
| H  | -3.651609 | -1.206542 | -4.392649 | C   | 0.903580  | 2.310882  | -0.968153 |
| H  | -6.091914 | -1.855401 | -0.908649 | C   | 1.362949  | 2.633414  | -2.249280 |
| H  | -5.874372 | -1.674196 | -3.375925 | C   | 0.857708  | 3.739531  | -2.932320 |
| C  | -1.743056 | -1.050713 | 1.672108  | C   | -0.100331 | 4.550525  | -2.328612 |
| C  | -1.585656 | 0.064344  | 2.498022  | C   | -0.546344 | 4.245915  | -1.044507 |
| C  | -2.215050 | -2.260885 | 2.196453  | H   | -2.353041 | 0.676714  | 2.959262  |
| C  | -1.905179 | -0.029539 | 3.853721  | H   | -1.747405 | 2.315467  | 4.697687  |
| H  | -1.198198 | 0.992160  | 2.077820  | H   | -0.430061 | 4.346747  | 4.088325  |
| C  | -2.541123 | -2.347470 | 3.548140  | H   | 0.306842  | 4.666184  | 1.736420  |
| H  | -2.311297 | -3.131216 | 1.548168  | H   | 2.121538  | 2.017630  | -2.722728 |
| C  | -2.383370 | -1.231801 | 4.375464  | H   | 1.221154  | 3.967022  | -3.930669 |
| H  | -1.775933 | 0.832864  | 4.501519  | H   | -0.500143 | 5.414958  | -2.851434 |
| H  | -2.910629 | -3.283052 | 3.958293  | H   | -1.301520 | 4.863544  | -0.563200 |
| H  | -2.632090 | -1.302748 | 5.430676  | P   | -1.789773 | 0.433191  | 0.107201  |
| Pd | -0.093062 | 0.979252  | -0.878630 | P   | 1.563362  | 0.823770  | -0.068221 |
| C  | 0.529422  | 2.487535  | -2.400218 | C   | -2.339620 | 1.369827  | -1.373412 |
| C  | -0.608297 | 2.929715  | -1.712708 | C   | -1.824201 | 1.068431  | -2.634420 |
| C  | -1.764955 | 2.094803  | -1.673870 | C   | -3.264877 | 2.410434  | -1.216508 |
| H  | -0.513748 | 3.776295  | -1.030824 | C   | -2.242716 | 1.807095  | -3.743294 |
| H  | -2.001868 | 1.527569  | -2.576926 | H   | -1.102682 | 0.258956  | -2.737481 |
| C  | -2.895994 | 2.320053  | -0.751679 | C   | -3.691247 | 3.133053  | -2.328121 |
| C  | -2.726560 | 2.980453  | 0.478301  | H   | -3.639193 | 2.655833  | -0.223147 |
| C  | -4.166591 | 1.829318  | -1.083914 | C   | -3.177657 | 2.830801  | -3.591968 |
| C  | -3.802361 | 3.154976  | 1.342617  | H   | -1.838508 | 1.577255  | -4.725141 |
| H  | -1.738229 | 3.339411  | 0.767103  | H   | -4.415617 | 3.934182  | -2.208605 |
| C  | -5.243073 | 1.999890  | -0.214676 | H   | -3.505545 | 3.397986  | -4.459138 |
| H  | -4.303923 | 1.299069  | -2.025106 | C   | -3.282285 | -0.437420 | 0.764291  |
| C  | -5.066115 | 2.665700  | 0.997856  | C   | -4.552312 | -0.224806 | 0.224135  |
| H  | -3.658195 | 3.668807  | 2.289088  | C   | -3.101178 | -1.377482 | 1.787693  |
| H  | -6.219802 | 1.609524  | -0.487479 | C   | -5.645379 | -0.933564 | 0.726566  |
| H  | -5.904853 | 2.801002  | 1.674592  | H   | -4.696096 | 0.464980  | -0.601248 |
| C  | 1.834729  | 3.224145  | -2.446159 | C   | -4.199229 | -2.072515 | 2.288920  |
| H  | 2.677081  | 2.524854  | -2.482719 | H   | -2.099977 | -1.574147 | 2.170615  |
| H  | 1.878535  | 3.835489  | -3.355862 | C   | -5.472762 | -1.851813 | 1.760479  |

|      |           |           |           |   |           |           |           |
|------|-----------|-----------|-----------|---|-----------|-----------|-----------|
| H    | -6.630418 | -0.771694 | 0.297407  | C | 2.335921  | 1.677470  | -2.475742 |
| H    | -4.052844 | -2.802213 | 3.080285  | C | 2.256967  | 2.840117  | -3.241957 |
| H    | -6.325594 | -2.404720 | 2.145123  | C | 1.679256  | 3.986081  | -2.701747 |
| C    | 2.991218  | 0.330176  | -1.125128 | C | 1.196386  | 3.958052  | -1.395666 |
| C    | 2.702799  | -0.461728 | -2.243654 | C | 0.728272  | 2.910008  | 0.786413  |
| C    | 4.305344  | 0.736399  | -0.877264 | C | -0.423970 | 2.260647  | 1.273829  |
| C    | 3.723713  | -0.823940 | -3.122731 | C | -0.836063 | 2.468421  | 2.593751  |
| H    | 1.680134  | -0.806548 | -2.409307 | C | -0.120355 | 3.314578  | 3.439642  |
| C    | 5.325696  | 0.354590  | -1.748937 | C | 1.012115  | 3.971504  | 2.962628  |
| H    | 4.536952  | 1.329990  | 0.002921  | C | 1.421203  | 3.773471  | 1.645948  |
| C    | 5.035751  | -0.417736 | -2.874974 | H | 2.814915  | 0.799470  | -2.896581 |
| H    | 3.494686  | -1.441071 | -3.987253 | H | 2.655565  | 2.846084  | -4.252658 |
| H    | 6.348226  | 0.662899  | -1.547879 | H | 1.608347  | 4.898595  | -3.287149 |
| H    | 5.832616  | -0.709089 | -3.554095 | H | 0.743864  | 4.846165  | -0.960088 |
| C    | 2.198477  | 1.587783  | 1.482758  | H | -1.724757 | 1.963178  | 2.962697  |
| C    | 1.825569  | 1.040148  | 2.713477  | H | -0.452145 | 3.460230  | 4.463880  |
| C    | 2.934790  | 2.779471  | 1.428245  | H | 1.580828  | 4.631198  | 3.612102  |
| C    | 2.221848  | 1.676943  | 3.892641  | H | 2.313986  | 4.267383  | 1.269112  |
| H    | 1.210123  | 0.139071  | 2.744980  | P | 1.846690  | 0.047901  | -0.198985 |
| C    | 3.329993  | 3.404489  | 2.608967  | P | -1.361134 | 1.097529  | 0.184041  |
| H    | 3.173675  | 3.225363  | 0.463264  | C | 2.635953  | 0.633970  | 1.364233  |
| C    | 2.973379  | 2.850489  | 3.841899  | C | 2.049686  | 0.459514  | 2.616730  |
| H    | 1.928494  | 1.255650  | 4.850273  | C | 3.834959  | 1.349452  | 1.237504  |
| H    | 3.905250  | 4.325733  | 2.568835  | C | 2.669577  | 0.998683  | 3.746389  |
| H    | 3.276382  | 3.342076  | 4.762857  | H | 1.120064  | -0.096945 | 2.704171  |
| Pd   | 0.019121  | -1.015434 | -0.009614 | C | 4.453835  | 1.875905  | 2.368685  |
| I    | -1.590276 | -2.632859 | -1.463803 | H | 4.277179  | 1.493891  | 0.252234  |
| C    | 1.596139  | -2.587255 | 0.485307  | C | 3.867878  | 1.700838  | 3.625243  |
| C    | 2.720997  | -2.010979 | 1.118194  | H | 2.208022  | 0.867157  | 4.721131  |
| C    | 1.811066  | -3.428909 | -0.625720 | H | 5.388209  | 2.421977  | 2.270192  |
| C    | 4.004382  | -2.220334 | 0.634515  | H | 4.347472  | 2.114304  | 4.508761  |
| H    | 2.554742  | -1.448487 | 2.035898  | C | 3.081604  | -1.083382 | -0.980639 |
| C    | 3.099608  | -3.639219 | -1.115851 | C | 2.847463  | -1.575006 | -2.272754 |
| H    | 0.962993  | -3.921425 | -1.094594 | C | 4.181757  | -1.546946 | -0.255085 |
| C    | 4.191146  | -3.030432 | -0.492738 | C | 3.729232  | -2.486433 | -2.847500 |
| H    | 4.860290  | -1.767931 | 1.129170  | H | 1.965506  | -1.260697 | -2.829325 |
| H    | 3.254446  | -4.280937 | -1.979694 | C | 5.056297  | -2.470690 | -0.831266 |
| H    | 5.194802  | -3.195159 | -0.877903 | H | 4.345284  | -1.210836 | 0.764381  |
| O    | 1.075675  | -3.878784 | 2.830837  | C | 4.837935  | -2.934847 | -2.126301 |
| S    | 0.244434  | -3.067158 | 1.923505  | H | 3.537138  | -2.860108 | -3.849155 |
| O    | 0.041529  | -1.655920 | 2.459770  | H | 5.901946  | -2.835725 | -0.255315 |
|      |           |           |           | H | 5.517785  | -3.657857 | -2.568401 |
| TS2' |           |           |           | C | -2.961779 | 0.788138  | 1.043525  |
| C    | 1.246037  | 2.793692  | -0.616959 | C | -2.963378 | -0.228225 | 2.008619  |
| C    | 1.827322  | 1.633009  | -1.173783 | C | -4.139929 | 1.483857  | 0.756303  |

|      |           |           |           |   |           |           |           |
|------|-----------|-----------|-----------|---|-----------|-----------|-----------|
| C    | -4.137524 | -0.525292 | 2.700612  | C | 3.053855  | -1.620117 | 1.646057  |
| H    | -2.051063 | -0.799322 | 2.195872  | C | 3.385204  | -2.936489 | 1.966566  |
| C    | -5.313789 | 1.171432  | 1.442758  | C | 3.070857  | -3.966994 | 1.084171  |
| H    | -4.151274 | 2.250385  | -0.013335 | C | 2.423141  | -3.666197 | -0.111067 |
| C    | -5.312547 | 0.172677  | 2.417379  | H | -1.654256 | -1.311796 | -3.128629 |
| H    | -4.133779 | -1.316557 | 3.445168  | H | -0.380458 | -1.737348 | -5.198851 |
| H    | -6.230311 | 1.708195  | 1.212612  | H | 2.004732  | -2.457558 | -5.064825 |
| H    | -6.229116 | -0.067087 | 2.949977  | H | 3.081493  | -2.719989 | -2.840250 |
| C    | -1.686716 | 2.159387  | -1.291051 | H | 3.326977  | -0.824953 | 2.332307  |
| C    | -1.321509 | 1.709636  | -2.563362 | H | 3.897410  | -3.148346 | 2.901131  |
| C    | -2.180405 | 3.459602  | -1.122619 | H | 3.325397  | -4.996326 | 1.321052  |
| C    | -1.476809 | 2.550503  | -3.667029 | H | 2.158897  | -4.458923 | -0.807572 |
| H    | -0.891353 | 0.714445  | -2.685790 | P | -0.967092 | -1.395195 | -0.264154 |
| C    | -2.342464 | 4.292879  | -2.228298 | P | 1.881963  | 0.452520  | 0.087678  |
| H    | -2.411016 | 3.824264  | -0.122281 | C | -0.774185 | -2.941957 | 0.708038  |
| C    | -1.991318 | 3.836695  | -3.501128 | C | -0.431276 | -2.874418 | 2.059972  |
| H    | -1.183660 | 2.200249  | -4.652801 | C | -0.886754 | -4.182221 | 0.066746  |
| H    | -2.730120 | 5.299500  | -2.095987 | C | -0.203471 | -4.053893 | 2.771556  |
| H    | -2.109488 | 4.489522  | -4.361992 | H | -0.344256 | -1.902233 | 2.542422  |
| Pd   | -0.279293 | -0.958264 | -0.302085 | C | -0.670960 | -5.356304 | 0.785109  |
| I    | 0.579311  | -2.787976 | 1.829844  | H | -1.121885 | -4.222069 | -0.996377 |
| C    | -2.146106 | -1.976740 | -0.868091 | C | -0.325015 | -5.290275 | 2.137231  |
| C    | -3.080102 | -1.216324 | -1.585859 | H | 0.070309  | -4.002882 | 3.821627  |
| C    | -2.573751 | -2.988959 | 0.003837  | H | -0.762648 | -6.319445 | 0.290241  |
| C    | -4.442255 | -1.394433 | -1.352330 | H | -0.147933 | -6.205858 | 2.695485  |
| H    | -2.739029 | -0.499159 | -2.328012 | C | -2.709771 | -1.280213 | -0.846174 |
| C    | -3.937376 | -3.171459 | 0.220469  | C | -3.603759 | -2.345616 | -0.740513 |
| H    | -1.836830 | -3.606848 | 0.511186  | C | -3.125092 | -0.061034 | -1.398981 |
| C    | -4.867167 | -2.359768 | -0.436562 | C | -4.914310 | -2.197794 | -1.199546 |
| H    | -5.168458 | -0.787296 | -1.886218 | H | -3.292162 | -3.279266 | -0.281085 |
| H    | -4.274539 | -3.943557 | 0.906883  | C | -4.428758 | 0.073560  | -1.869720 |
| H    | -5.929770 | -2.496244 | -0.251628 | H | -2.437710 | 0.787393  | -1.438015 |
| O    | -0.269577 | -3.884707 | -1.966867 | C | -5.324525 | -0.993908 | -1.769015 |
| S    | -0.393662 | -2.436982 | -2.016382 | H | -5.613547 | -3.023963 | -1.104283 |
| O    | -0.616201 | -1.819681 | -3.328856 | H | -4.746523 | 1.021208  | -2.294096 |
|      |           |           |           | H | -6.345291 | -0.880910 | -2.124349 |
| INT2 |           |           |           | C | 2.914154  | 1.445669  | 1.243582  |
| C    | 1.341877  | -2.147473 | -1.729967 | C | 2.529442  | 1.481703  | 2.589479  |
| C    | -0.006279 | -1.750188 | -1.811265 | C | 4.027373  | 2.169846  | 0.814938  |
| C    | -0.612271 | -1.611113 | -3.064244 | C | 3.287104  | 2.202204  | 3.510709  |
| C    | 0.105541  | -1.856892 | -4.234490 | H | 1.620964  | 0.969004  | 2.904932  |
| C    | 1.435990  | -2.263347 | -4.159644 | C | 4.777760  | 2.896671  | 1.739626  |
| C    | 2.039774  | -2.416248 | -2.913690 | H | 4.290532  | 2.192069  | -0.238397 |
| C    | 2.055292  | -2.353074 | -0.432135 | C | 4.414891  | 2.907153  | 3.086355  |
| C    | 2.383850  | -1.309560 | 0.457100  | H | 2.983002  | 2.229089  | 4.553255  |

|       |           |           |           |   |           |           |           |
|-------|-----------|-----------|-----------|---|-----------|-----------|-----------|
| H     | 5.640836  | 3.464377  | 1.402632  | H | -3.417261 | -1.828692 | 4.637861  |
| H     | 5.000107  | 3.477654  | 3.802724  | H | -4.292535 | -1.370900 | 2.357010  |
| C     | 2.512812  | 0.668478  | -1.623789 | H | -3.152836 | 1.005701  | -2.468279 |
| C     | 1.667526  | 1.149073  | -2.624649 | H | -4.594562 | -0.737517 | -3.453151 |
| C     | 3.815968  | 0.263755  | -1.931836 | H | -5.054413 | -2.835901 | -2.182423 |
| C     | 2.130514  | 1.228006  | -3.937411 | H | -4.024876 | -3.159328 | 0.056363  |
| H     | 0.656870  | 1.452901  | -2.360039 | P | 0.138156  | -1.803014 | 0.123438  |
| C     | 4.282032  | 0.363278  | -3.242709 | P | -1.591869 | 1.196783  | 0.012510  |
| H     | 4.457298  | -0.138111 | -1.148173 | C | -0.610100 | -2.944877 | -1.104271 |
| C     | 3.436766  | 0.842240  | -4.245138 | C | -0.711069 | -2.539704 | -2.437326 |
| H     | 1.470509  | 1.590962  | -4.720855 | C | -1.144030 | -4.173745 | -0.695686 |
| H     | 5.298162  | 0.060666  | -3.481383 | C | -1.344241 | -3.370828 | -3.363639 |
| H     | 3.795882  | 0.911915  | -5.268733 | H | -0.296160 | -1.578488 | -2.737548 |
| Pd    | -0.375236 | 0.602115  | 0.760893  | C | -1.765897 | -5.003675 | -1.626293 |
| I     | -2.536688 | 0.420162  | 2.317342  | H | -1.091938 | -4.463392 | 0.353396  |
| O     | 1.306851  | 3.178791  | -0.503231 | C | -1.867834 | -4.599169 | -2.959910 |
| S     | 0.250429  | 3.605133  | 0.477227  | H | -1.428441 | -3.054946 | -4.399703 |
| O     | -0.048694 | 2.481305  | 1.527151  | H | -2.177987 | -5.958805 | -1.311678 |
| C     | -1.255926 | 3.533286  | -0.513360 | H | -2.359205 | -5.243475 | -3.684310 |
| C     | -1.153837 | 3.620105  | -1.901787 | C | 1.689800  | -2.568493 | 0.760297  |
| C     | -2.498136 | 3.465946  | 0.119816  | C | 1.999593  | -3.917895 | 0.587740  |
| C     | -2.319075 | 3.625872  | -2.672501 | C | 2.583981  | -1.727106 | 1.435922  |
| H     | -0.165204 | 3.685340  | -2.349825 | C | 3.197874  | -4.424156 | 1.097282  |
| C     | -3.657108 | 3.470105  | -0.655865 | H | 1.324978  | -4.570221 | 0.040115  |
| H     | -2.545606 | 3.378321  | 1.202302  | C | 3.771645  | -2.237031 | 1.952366  |
| C     | -3.566989 | 3.559437  | -2.048531 | H | 2.365759  | -0.662735 | 1.529017  |
| H     | -2.254924 | 3.696867  | -3.755459 | C | 4.080163  | -3.588872 | 1.781335  |
| H     | -4.628492 | 3.397304  | -0.173804 | H | 3.442756  | -5.472627 | 0.950759  |
| H     | -4.473715 | 3.579864  | -2.649319 | H | 4.461957  | -1.568351 | 2.460113  |
|       |           |           |           | H | 5.013553  | -3.987270 | 2.169962  |
| INT2' |           |           |           | C | -1.902212 | 2.686230  | -1.023887 |
| C     | -2.391553 | -1.577266 | 1.391333  | C | -1.268980 | 2.745423  | -2.271909 |
| C     | -1.024710 | -1.867277 | 1.568546  | C | -2.717206 | 3.737791  | -0.599885 |
| C     | -0.537352 | -2.134064 | 2.852731  | C | -1.473781 | 3.845292  | -3.102818 |
| C     | -1.388549 | -2.112479 | 3.957384  | H | -0.589771 | 1.947799  | -2.577650 |
| C     | -2.745314 | -1.845767 | 3.784251  | C | -2.914308 | 4.837551  | -1.434010 |
| C     | -3.238595 | -1.594600 | 2.505903  | H | -3.176370 | 3.713065  | 0.384108  |
| C     | -2.990303 | -1.284042 | 0.052199  | C | -2.298945 | 4.889609  | -2.685268 |
| C     | -2.746001 | -0.093729 | -0.661386 | H | -0.966771 | 3.893872  | -4.061794 |
| C     | -3.335498 | 0.087561  | -1.917552 | H | -3.540993 | 5.659848  | -1.099672 |
| C     | -4.155104 | -0.894959 | -2.472065 | H | -2.448736 | 5.752906  | -3.328046 |
| C     | -4.415283 | -2.064741 | -1.761382 | C | -2.231099 | 1.514552  | 1.701889  |
| C     | -3.844465 | -2.244459 | -0.503595 | C | -1.346720 | 1.532008  | 2.780856  |
| H     | 0.516167  | -2.361329 | 2.990812  | C | -3.607662 | 1.658183  | 1.913245  |
| H     | -0.989881 | -2.314114 | 4.947868  | C | -1.840148 | 1.692913  | 4.075751  |

|      |           |           |           |   |           |           |           |
|------|-----------|-----------|-----------|---|-----------|-----------|-----------|
| H    | -0.282051 | 1.417469  | 2.589769  | P | -1.553825 | 0.963512  | 0.476487  |
| C    | -4.095712 | 1.833067  | 3.207080  | P | 1.616757  | 0.380317  | -0.572414 |
| H    | -4.292230 | 1.613859  | 1.066839  | C | -2.442780 | 2.028887  | -0.709992 |
| C    | -3.210942 | 1.845688  | 4.287854  | C | -2.424757 | 1.706045  | -2.069030 |
| H    | -1.153809 | 1.700119  | 4.917980  | C | -3.075666 | 3.192060  | -0.254285 |
| H    | -5.163293 | 1.950401  | 3.372862  | C | -3.039969 | 2.563539  | -2.982207 |
| H    | -3.592042 | 1.974025  | 5.297593  | H | -1.931788 | 0.793473  | -2.398752 |
| Pd   | 0.614972  | 0.478292  | -0.398190 | C | -3.693933 | 4.038304  | -1.172025 |
| I    | 2.601866  | -0.285637 | -2.013073 | H | -3.069764 | 3.436599  | 0.807050  |
| S    | 1.355831  | 2.645787  | -0.199308 | C | -3.669495 | 3.725509  | -2.534401 |
| O    | 1.694922  | 3.389409  | -1.422165 | H | -3.027801 | 2.323254  | -4.041302 |
| O    | 0.477493  | 3.298441  | 0.804247  | H | -4.190588 | 4.940931  | -0.827953 |
| C    | 2.894258  | 2.336663  | 0.671120  | H | -4.147365 | 4.390497  | -3.248331 |
| C    | 4.098987  | 2.373344  | -0.027887 | C | -2.752654 | 0.047136  | 1.512907  |
| C    | 2.840393  | 2.006002  | 2.025184  | C | -4.126185 | 0.105883  | 1.265862  |
| C    | 5.275140  | 2.048644  | 0.646768  | C | -2.241404 | -0.861319 | 2.453797  |
| H    | 4.091071  | 2.643164  | -1.079821 | C | -4.989874 | -0.730747 | 1.978272  |
| C    | 4.021940  | 1.673566  | 2.689342  | H | -4.516448 | 0.787272  | 0.513847  |
| H    | 1.884017  | 2.031959  | 2.541904  | C | -3.110300 | -1.681359 | 3.171426  |
| C    | 5.235190  | 1.688004  | 1.996409  | H | -1.163775 | -0.921365 | 2.616342  |
| H    | 6.224222  | 2.071230  | 0.118517  | C | -4.485731 | -1.616076 | 2.931577  |
| H    | 3.998976  | 1.418058  | 3.745851  | H | -6.057186 | -0.691006 | 1.782588  |
| H    | 6.156063  | 1.431056  | 2.513931  | H | -2.716004 | -2.375635 | 3.908244  |
|      |           |           |           | H | -5.162872 | -2.262918 | 3.481560  |
| TS2b |           |           |           | C | 2.749232  | -0.375000 | -1.814659 |
| C    | 0.374631  | 2.924350  | 0.986671  | C | 2.179410  | -0.942189 | -2.963938 |
| C    | -0.586276 | 2.077566  | 1.570012  | C | 4.131862  | -0.442206 | -1.621645 |
| C    | -0.770026 | 2.070188  | 2.956545  | C | 2.985420  | -1.566756 | -3.913814 |
| C    | 0.014902  | 2.882995  | 3.773681  | H | 1.097971  | -0.901443 | -3.104103 |
| C    | 0.972874  | 3.720752  | 3.204536  | C | 4.936151  | -1.073077 | -2.573120 |
| C    | 1.135110  | 3.751122  | 1.820214  | H | 4.580327  | -0.035868 | -0.719789 |
| C    | 0.554873  | 3.028469  | -0.494891 | C | 4.366759  | -1.635645 | -3.715409 |
| C    | 1.109627  | 2.015484  | -1.303781 | H | 2.537270  | -2.003669 | -4.801491 |
| C    | 1.219380  | 2.221039  | -2.683304 | H | 6.009272  | -1.130009 | -2.415323 |
| C    | 0.769237  | 3.403200  | -3.270701 | H | 4.996102  | -2.129830 | -4.449793 |
| C    | 0.220927  | 4.407706  | -2.476609 | C | 2.624843  | 0.836684  | 0.887188  |
| C    | 0.131899  | 4.219741  | -1.099369 | C | 2.341262  | 0.278734  | 2.132683  |
| H    | -1.532378 | 1.437156  | 3.400917  | C | 3.634837  | 1.799349  | 0.751671  |
| H    | -0.132841 | 2.868640  | 4.849528  | C | 3.081044  | 0.671293  | 3.249598  |
| H    | 1.586392  | 4.358405  | 3.834442  | H | 1.544170  | -0.456601 | 2.222713  |
| H    | 1.875245  | 4.406299  | 1.367120  | C | 4.375345  | 2.181994  | 1.867443  |
| H    | 1.668492  | 1.458303  | -3.311439 | H | 3.826677  | 2.254175  | -0.219564 |
| H    | 0.859545  | 3.537442  | -4.344661 | C | 4.096550  | 1.617890  | 3.116253  |
| H    | -0.130362 | 5.333640  | -2.922265 | H | 2.862692  | 0.233808  | 4.219910  |
| H    | -0.298038 | 4.992894  | -0.466780 | H | 5.163103  | 2.923158  | 1.766621  |

|       |           |           |           |   |           |           |           |
|-------|-----------|-----------|-----------|---|-----------|-----------|-----------|
| H     | 4.672937  | 1.920923  | 3.985925  | H | 0.129532  | 3.535902  | -4.367825 |
| Pd    | -0.368495 | -0.857098 | -0.408242 | H | -1.194338 | 5.134356  | -2.983456 |
| C     | -1.512572 | -4.041005 | -1.513147 | H | -1.318708 | 4.807324  | -0.522469 |
| C     | -0.495272 | -3.819934 | -0.581099 | P | -1.767518 | 0.588750  | 0.475937  |
| C     | 0.581522  | -2.894865 | -0.635670 | P | 1.450693  | 0.654978  | -0.526280 |
| H     | -0.591099 | -4.390054 | 0.348297  | C | -2.825010 | 1.456089  | -0.730250 |
| H     | 1.019215  | -2.728139 | -1.621919 | C | -2.747614 | 1.143526  | -2.089009 |
| C     | 1.531577  | -2.929955 | 0.511492  | C | -3.659108 | 2.482357  | -0.269262 |
| C     | 2.918999  | -2.912800 | 0.304421  | C | -3.508912 | 1.879193  | -2.997830 |
| C     | 1.051624  | -3.025200 | 1.831408  | H | -2.108808 | 0.327565  | -2.418928 |
| C     | 3.798747  | -2.960715 | 1.386007  | C | -4.423450 | 3.203246  | -1.184061 |
| H     | 3.303596  | -2.888282 | -0.712983 | H | -3.698502 | 2.720906  | 0.792823  |
| C     | 1.932023  | -3.100035 | 2.909172  | C | -4.340998 | 2.904935  | -2.547016 |
| H     | -0.025304 | -3.035042 | 2.005692  | H | -3.455641 | 1.646161  | -4.057199 |
| C     | 3.311247  | -3.054721 | 2.690949  | H | -5.078266 | 3.996980  | -0.836448 |
| H     | 4.870441  | -2.947545 | 1.206046  | H | -4.933555 | 3.472168  | -3.259306 |
| H     | 1.542845  | -3.186370 | 3.920512  | C | -2.754744 | -0.522142 | 1.541775  |
| H     | 3.999841  | -3.105073 | 3.529432  | C | -4.123125 | -0.694255 | 1.330985  |
| C     | -2.305924 | -5.320699 | -1.533483 | C | -2.070813 | -1.317515 | 2.473782  |
| H     | -2.355799 | -5.771107 | -0.536048 | C | -4.813992 | -1.654354 | 2.074324  |
| H     | -3.324872 | -5.137057 | -1.889968 | H | -4.639370 | -0.101871 | 0.579858  |
| H     | -1.839200 | -6.046554 | -2.207686 | C | -2.769273 | -2.263960 | 3.219435  |
| H     | -1.458886 | -3.482205 | -2.451418 | H | -0.993832 | -1.192308 | 2.606582  |
| S     | -2.959890 | -2.632183 | -0.514047 | C | -4.142061 | -2.431958 | 3.017122  |
| O     | -4.209039 | -2.890595 | -1.226252 | H | -5.877256 | -1.798010 | 1.907854  |
| O     | -2.220126 | -1.431507 | -1.113209 | H | -2.245670 | -2.875500 | 3.948794  |
| INT2b |           |           |           | H | -4.685258 | -3.178573 | 3.588867  |
| C     | -0.270285 | 2.914734  | 0.965627  | C | 2.675788  | 0.097624  | -1.783738 |
| C     | -1.026394 | 1.882277  | 1.551811  | C | 2.190954  | -0.627621 | -2.882002 |
| C     | -1.207791 | 1.844827  | 2.938932  | C | 4.045654  | 0.344002  | -1.663967 |
| C     | -0.622488 | 2.815291  | 3.751643  | C | 3.071476  | -1.109124 | -3.849533 |
| C     | 0.133830  | 3.836562  | 3.178665  | H | 1.119849  | -0.820231 | -2.972364 |
| C     | 0.292933  | 3.890448  | 1.794552  | C | 4.924985  | -0.136798 | -2.636431 |
| C     | -0.105292 | 3.041916  | -0.513888 | H | 4.435617  | 0.873559  | -0.799919 |
| C     | 0.640821  | 2.142101  | -1.299961 | C | 4.442187  | -0.865252 | -3.723977 |
| C     | 0.721839  | 2.339939  | -2.682379 | H | 2.690537  | -1.671958 | -4.696778 |
| C     | 0.058681  | 3.405101  | -3.292035 | H | 5.990133  | 0.051298  | -2.536716 |
| C     | -0.677321 | 4.299977  | -2.518913 | H | 5.130555  | -1.243004 | -4.474382 |
| C     | -0.742350 | 4.121339  | -1.138852 | C | 2.362010  | 1.327728  | 0.912848  |
| H     | -1.816401 | 1.065241  | 3.386936  | C | 2.159660  | 0.787762  | 2.182654  |
| H     | -0.769334 | 2.776963  | 4.826986  | C | 3.184486  | 2.450310  | 0.742486  |
| H     | 0.591129  | 4.596948  | 3.805154  | C | 2.806353  | 1.349560  | 3.284684  |
| H     | 0.876327  | 4.686225  | 1.337732  | H | 1.484811  | -0.056655 | 2.304716  |
| H     | 1.311307  | 1.665606  | -3.295335 | C | 3.833075  | 3.003718  | 1.843731  |
|       |           |           |           | H | 3.298381  | 2.896922  | -0.244473 |

|      |           |           |           |   |           |           |           |
|------|-----------|-----------|-----------|---|-----------|-----------|-----------|
| C    | 3.645176  | 2.450607  | 3.113945  | H | 0.361687  | 3.670975  | -4.411740 |
| H    | 2.648298  | 0.930590  | 4.274582  | H | -0.504255 | 4.115564  | -2.124385 |
| H    | 4.476377  | 3.869374  | 1.714713  | H | -2.251161 | 1.920962  | 2.552409  |
| H    | 4.148354  | 2.886570  | 3.972430  | H | -1.413267 | 4.002173  | 3.572741  |
| Pd   | -0.275695 | -0.951492 | -0.382725 | H | 0.298339  | 5.371076  | 2.377858  |
| C    | -0.899720 | -3.961697 | -1.082795 | H | 1.146241  | 4.611105  | 0.169559  |
| C    | 0.109594  | -3.377816 | -0.162871 | P | 1.787975  | 0.213801  | -0.035606 |
| C    | 1.315398  | -2.822779 | -0.500118 | P | -1.613329 | 0.461276  | 0.077801  |
| H    | -0.108789 | -3.539068 | 0.897982  | C | 2.338241  | 1.327194  | 1.317070  |
| H    | 1.592980  | -2.796316 | -1.554905 | C | 1.815723  | 1.184678  | 2.603029  |
| C    | 2.414968  | -2.579844 | 0.461895  | C | 3.248528  | 2.351496  | 1.028310  |
| C    | 3.709906  | -2.394463 | -0.039603 | C | 2.200509  | 2.081615  | 3.601151  |
| C    | 2.226502  | -2.587581 | 1.854576  | H | 1.130424  | 0.365024  | 2.806181  |
| C    | 4.786836  | -2.189638 | 0.823215  | C | 3.643104  | 3.232288  | 2.033309  |
| H    | 3.869041  | -2.414103 | -1.116716 | H | 3.635421  | 2.459862  | 0.015340  |
| C    | 3.303063  | -2.401323 | 2.715422  | C | 3.112165  | 3.099495  | 3.318724  |
| H    | 1.229558  | -2.728104 | 2.270939  | H | 1.790546  | 1.980007  | 4.602260  |
| C    | 4.587059  | -2.191568 | 2.202701  | H | 4.355520  | 4.023082  | 1.813763  |
| H    | 5.782226  | -2.040749 | 0.413536  | H | 3.412464  | 3.790716  | 4.102062  |
| H    | 3.142548  | -2.413265 | 3.790265  | C | 3.271159  | -0.726541 | -0.593819 |
| H    | 5.425036  | -2.040882 | 2.876992  | C | 4.523292  | -0.555262 | 0.000918  |
| C    | -1.050271 | -5.473130 | -0.930944 | C | 3.104031  | -1.687106 | -1.601795 |
| H    | -1.223197 | -5.745620 | 0.116797  | C | 5.612402  | -1.309385 | -0.441303 |
| H    | -1.912115 | -5.802321 | -1.519587 | H | 4.647752  | 0.151491  | 0.816141  |
| H    | -0.156588 | -5.997568 | -1.278971 | C | 4.196320  | -2.427220 | -2.049906 |
| H    | -0.737804 | -3.657822 | -2.125816 | H | 2.110589  | -1.871348 | -2.007902 |
| S    | -2.498017 | -3.172159 | -0.604897 | C | 5.453793  | -2.235057 | -1.472351 |
| O    | -3.497679 | -3.648980 | -1.581050 | H | 6.583809  | -1.173582 | 0.026131  |
| O    | -2.026056 | -1.705214 | -1.051247 | H | 4.059371  | -3.168430 | -2.832111 |
|      |           |           |           | H | 6.303863  | -2.819238 | -1.814661 |
| INT3 |           |           |           | C | -3.078656 | 0.053545  | 1.114947  |
| C    | 0.521195  | 2.468566  | -1.217992 | C | -2.831814 | -0.569140 | 2.345699  |
| C    | 1.402943  | 1.388891  | -1.427302 | C | -4.385859 | 0.333694  | 0.720029  |
| C    | 1.908099  | 1.162180  | -2.712252 | C | -3.892659 | -0.888109 | 3.188001  |
| C    | 1.533961  | 1.968998  | -3.786302 | H | -1.808715 | -0.826172 | 2.622351  |
| C    | 0.661590  | 3.035706  | -3.582981 | C | -5.448716 | -0.003531 | 1.561848  |
| C    | 0.178635  | 3.287670  | -2.301565 | H | -4.581686 | 0.788059  | -0.247178 |
| C    | -0.045055 | 2.832525  | 0.118551  | C | -5.203838 | -0.607065 | 2.793822  |
| C    | -1.011729 | 2.064966  | 0.795789  | H | -3.699026 | -1.376721 | 4.138603  |
| C    | -1.498157 | 2.504658  | 2.031730  | H | -6.468471 | 0.201002  | 1.247520  |
| C    | -1.028765 | 3.684576  | 2.607506  | H | -6.033708 | -0.870679 | 3.443893  |
| C    | -0.077026 | 4.450783  | 1.938972  | C | -2.189776 | 0.949494  | -1.596308 |
| C    | 0.395606  | 4.028516  | 0.698856  | C | -1.804844 | 0.190323  | -2.703790 |
| H    | 2.606451  | 0.348360  | -2.880037 | C | -2.930537 | 2.125822  | -1.766683 |
| H    | 1.933554  | 1.765096  | -4.775922 | C | -2.162127 | 0.612908  | -3.985610 |



|      |           |           |           |   |           |           |           |
|------|-----------|-----------|-----------|---|-----------|-----------|-----------|
| H    | -1.227004 | -0.720367 | -2.552181 | H | -4.318623 | 4.380105  | -2.236376 |
| C    | -3.296798 | 2.534981  | -3.047237 | H | -6.635938 | 3.781882  | -1.575125 |
| H    | -3.197171 | 2.727543  | -0.898398 | C | 2.163132  | 0.024107  | -2.370795 |
| C    | -2.906772 | 1.780042  | -4.156502 | C | 2.873564  | -0.069085 | -1.158481 |
| H    | -1.857359 | 0.027874  | -4.848772 | C | 4.072697  | -0.789531 | -1.119227 |
| H    | -3.875557 | 3.444969  | -3.181200 | C | 4.559762  | -1.438029 | -2.253610 |
| H    | -3.184100 | 2.104753  | -5.155984 | C | 3.856811  | -1.355380 | -3.453298 |
| Pd   | -0.045161 | -1.253449 | 0.138511  | C | 2.678762  | -0.614825 | -3.506281 |
| O    | 1.239317  | -2.823516 | 0.287333  | C | 0.917871  | 0.837428  | -2.552394 |
| C    | 2.042883  | -2.732696 | 1.302619  | C | -0.353238 | 0.485031  | -2.052773 |
| O    | 2.064605  | -1.785782 | 2.101324  | C | -1.448960 | 1.307998  | -2.326710 |
| C    | 3.045509  | -3.863587 | 1.391635  | C | -1.302684 | 2.463206  | -3.093265 |
| H    | 3.447758  | -3.933081 | 2.403204  | C | -0.050824 | 2.816198  | -3.592204 |
| H    | 2.593407  | -4.808273 | 1.083892  | C | 1.044911  | 1.999615  | -3.326565 |
| H    | 3.863581  | -3.633730 | 0.697360  | H | 4.640586  | -0.843407 | -0.195449 |
| I    | -1.955704 | -3.038616 | -0.288441 | H | 5.490080  | -1.996969 | -2.196916 |
|      |           |           |           | H | 4.222855  | -1.858452 | -4.344206 |
| INT4 |           |           |           | H | 2.119140  | -0.538219 | -4.435801 |
| S    | -1.755546 | -0.000019 | -0.345357 | H | -2.425562 | 1.060920  | -1.920929 |
| O    | -2.134423 | 1.278493  | 0.363173  | H | -2.173034 | 3.085727  | -3.286695 |
| O    | -2.134376 | -1.278480 | 0.363363  | H | 0.075490  | 3.719860  | -4.182318 |
| C    | 0.066328  | -0.000004 | -0.112393 | H | 2.033034  | 2.266185  | -3.695987 |
| C    | 0.762341  | 1.207216  | -0.058039 | P | 2.206134  | 0.786154  | 0.353007  |
| C    | 0.762362  | -1.207216 | -0.058109 | P | -0.542461 | -0.969169 | -0.910945 |
| C    | 2.155327  | 1.209610  | 0.035747  | C | 2.319117  | 2.549186  | -0.168412 |
| H    | 0.176806  | 2.125038  | -0.064879 | C | 1.198829  | 3.370835  | -0.025245 |
| C    | 2.155346  | -1.209595 | 0.035655  | C | 3.470773  | 3.017238  | -0.816175 |
| H    | 0.176826  | -2.125037 | -0.064995 | C | 1.238743  | 4.672216  | -0.534999 |
| C    | 2.855224  | 0.000014  | 0.077320  | H | 0.290918  | 2.966412  | 0.426554  |
| H    | 2.701010  | 2.151548  | 0.086314  | C | 3.503185  | 4.317180  | -1.315335 |
| H    | 2.701041  | -2.151529 | 0.086144  | H | 4.327365  | 2.355283  | -0.942249 |
| H    | 3.941886  | 0.000024  | 0.149749  | C | 2.382775  | 5.143242  | -1.177236 |
|      |           |           |           | H | 0.364053  | 5.310682  | -0.438577 |
| INT5 |           |           |           | H | 4.394130  | 4.684161  | -1.818317 |
| S    | -2.273577 | 2.368559  | 1.771369  | H | 2.405230  | 6.153830  | -1.577476 |
| O    | -1.327827 | 1.767585  | 0.711628  | C | 3.531706  | 0.506122  | 1.605953  |
| C    | -3.670295 | 2.805839  | 0.704763  | C | 4.333043  | 1.527270  | 2.117778  |
| C    | -4.967207 | 2.476873  | 1.090319  | C | 3.653891  | -0.794074 | 2.121618  |
| C    | -3.426180 | 3.495728  | -0.483405 | C | 5.242683  | 1.252826  | 3.143904  |
| C    | -6.036967 | 2.826064  | 0.261521  | H | 4.235521  | 2.538623  | 1.730687  |
| H    | -5.105157 | 1.934105  | 2.023009  | C | 4.581012  | -1.071797 | 3.122423  |
| C    | -4.496819 | 3.845771  | -1.305169 | H | 2.997102  | -1.578679 | 1.740535  |
| H    | -2.398513 | 3.723982  | -0.761800 | C | 5.371839  | -0.041969 | 3.642788  |
| C    | -5.802165 | 3.509132  | -0.933049 | H | 5.851846  | 2.055698  | 3.550392  |
| H    | -7.053942 | 2.567235  | 0.547070  | H | 4.674399  | -2.082304 | 3.511400  |

|    |           |           |           |     |           |           |           |
|----|-----------|-----------|-----------|-----|-----------|-----------|-----------|
| H  | 6.082561  | -0.251077 | 4.437662  | O   | -2.862041 | 1.288025  | 2.650091  |
| C  | -2.323756 | -1.469912 | -0.920127 |     |           |           |           |
| C  | -3.235903 | -0.642783 | -0.248843 | TS3 |           |           |           |
| C  | -2.763366 | -2.678492 | -1.469213 | S   | -3.935454 | -2.194038 | 0.912537  |
| C  | -4.583307 | -0.992728 | -0.184115 | O   | -4.339285 | -3.545581 | 1.402072  |
| H  | -2.876441 | 0.261493  | 0.237240  | C   | -5.470695 | -1.386199 | 0.435638  |
| C  | -4.111824 | -3.032371 | -1.384951 | C   | -5.561518 | 0.006647  | 0.437407  |
| H  | -2.062271 | -3.360441 | -1.940563 | C   | -6.530613 | -2.172565 | -0.015010 |
| C  | -5.025414 | -2.187658 | -0.755639 | C   | -6.729692 | 0.616730  | -0.020773 |
| H  | -5.276026 | -0.327329 | 0.324823  | H   | -4.731939 | 0.594187  | 0.826848  |
| H  | -4.443010 | -3.977158 | -1.808641 | C   | -7.697861 | -1.557073 | -0.466195 |
| H  | -6.075000 | -2.465474 | -0.699583 | H   | -6.426743 | -3.254112 | 0.020635  |
| C  | 0.314550  | -2.320117 | -1.831754 | C   | -7.795191 | -0.163566 | -0.475024 |
| C  | 1.331356  | -3.054608 | -1.220681 | H   | -6.813471 | 1.700930  | -0.016709 |
| C  | -0.020055 | -2.574635 | -3.168224 | H   | -8.534610 | -2.162047 | -0.807054 |
| C  | 2.005838  | -4.046165 | -1.935714 | H   | -8.704332 | 0.314717  | -0.831150 |
| H  | 1.608302  | -2.819138 | -0.194168 | C   | 3.693592  | 0.676390  | 0.223801  |
| C  | 0.645677  | -3.571376 | -3.878923 | C   | 3.326293  | -0.234468 | -0.789004 |
| H  | -0.798711 | -1.981947 | -3.647073 | C   | 3.856945  | -0.089010 | -2.075428 |
| C  | 1.659176  | -4.308317 | -3.261039 | C   | 4.737348  | 0.950345  | -2.373258 |
| H  | 2.807496  | -4.605373 | -1.460414 | C   | 5.114496  | 1.846446  | -1.374848 |
| H  | 0.380492  | -3.768654 | -4.914295 | C   | 4.607055  | 1.692092  | -0.086782 |
| H  | 2.183828  | -5.081163 | -3.816845 | C   | 3.199227  | 0.599208  | 1.638778  |
| Pd | 0.187417  | -0.194579 | 1.230460  | C   | 1.918547  | 1.025605  | 2.046701  |
| C  | 0.264980  | 0.355348  | 3.381873  | C   | 1.550810  | 0.922924  | 3.392671  |
| C  | 0.017573  | -1.021114 | 3.234973  | C   | 2.433036  | 0.398125  | 4.336169  |
| C  | -1.135537 | -1.388975 | 2.487752  | C   | 3.706840  | -0.008339 | 3.943143  |
| H  | 0.776021  | -1.755335 | 3.513699  | C   | 4.084680  | 0.110002  | 2.607353  |
| H  | -1.983869 | -0.697409 | 2.529113  | H   | 3.572684  | -0.792476 | -2.854099 |
| C  | -1.431767 | -2.782274 | 2.095538  | H   | 5.130528  | 1.051748  | -3.381160 |
| C  | -0.415604 | -3.702196 | 1.790745  | H   | 5.799765  | 2.660554  | -1.593916 |
| C  | -2.766178 | -3.199225 | 1.994971  | H   | 4.889268  | 2.387829  | 0.700164  |
| C  | -0.724392 | -4.997002 | 1.385208  | H   | 0.561464  | 1.249698  | 3.702381  |
| H  | 0.623041  | -3.376711 | 1.843959  | H   | 2.124474  | 0.315161  | 5.374646  |
| C  | -3.077156 | -4.499340 | 1.598496  | H   | 4.403479  | -0.418212 | 4.669270  |
| H  | -3.558157 | -2.485634 | 2.210620  | H   | 5.073004  | -0.212266 | 2.286749  |
| C  | -2.059326 | -5.401060 | 1.288336  | P   | 1.995578  | -1.484970 | -0.475372 |
| H  | 0.074830  | -5.690165 | 1.133907  | P   | 0.678859  | 1.574693  | 0.787678  |
| H  | -4.118542 | -4.799318 | 1.513435  | C   | 2.530012  | -2.405763 | 1.021337  |
| H  | -2.301079 | -6.410549 | 0.966244  | C   | 1.601691  | -2.591748 | 2.049780  |
| C  | 1.440938  | 0.935028  | 4.111132  | C   | 3.845499  | -2.863307 | 1.169939  |
| H  | 1.786104  | 1.855648  | 3.628412  | C   | 1.986250  | -3.245116 | 3.222673  |
| H  | 1.135850  | 1.201975  | 5.131129  | H   | 0.588421  | -2.204187 | 1.935481  |
| H  | 2.284345  | 0.241046  | 4.173895  | C   | 4.224192  | -3.521274 | 2.338295  |
| H  | -0.618437 | 0.993486  | 3.310819  | H   | 4.571865  | -2.681097 | 0.378278  |

|    |           |           |           |      |           |           |           |
|----|-----------|-----------|-----------|------|-----------|-----------|-----------|
| C  | 3.293463  | -3.710919 | 3.363855  | C    | -2.481285 | 2.694309  | -1.270047 |
| H  | 1.265124  | -3.383510 | 4.023172  | C    | -1.480649 | 2.614391  | -3.872251 |
| H  | 5.244149  | -3.878209 | 2.454400  | H    | -1.219748 | 0.501645  | -3.550199 |
| H  | 3.591482  | -4.219069 | 4.277146  | C    | -2.381546 | 3.867053  | -2.015389 |
| C  | 2.056380  | -2.681625 | -1.881770 | H    | -2.875092 | 2.717531  | -0.253966 |
| C  | 2.675357  | -3.932170 | -1.811931 | C    | -1.877827 | 3.834217  | -3.317667 |
| C  | 1.368903  | -2.315657 | -3.049062 | H    | -1.097725 | 2.578145  | -4.889294 |
| C  | 2.614261  | -4.803683 | -2.902044 | H    | -2.701912 | 4.809447  | -1.578453 |
| H  | 3.188798  | -4.237861 | -0.904544 | H    | -1.802843 | 4.749325  | -3.898855 |
| C  | 1.324932  | -3.179146 | -4.141568 | C    | -1.435665 | -3.510848 | -0.739239 |
| H  | 0.854787  | -1.353100 | -3.079468 | H    | -0.465676 | -3.803258 | -0.316324 |
| C  | 1.946272  | -4.428274 | -4.066600 | H    | -2.200649 | -4.146153 | -0.274928 |
| H  | 3.088157  | -5.779324 | -2.836543 | H    | -1.411435 | -3.691461 | -1.818834 |
| H  | 0.793503  | -2.886234 | -5.043026 | H    | -1.684151 | -1.767589 | 0.625119  |
| H  | 1.899742  | -5.110257 | -4.911211 | O    | -3.354399 | -1.238330 | 1.931965  |
| C  | -0.739842 | 2.287519  | 1.722759  |      |           |           |           |
| C  | -1.683889 | 1.378385  | 2.220431  | TS3' |           |           |           |
| C  | -0.975113 | 3.661699  | 1.827551  | S    | -2.237527 | -2.924814 | -0.629801 |
| C  | -2.864158 | 1.834415  | 2.806190  | O    | -1.251351 | -1.907405 | -1.201072 |
| H  | -1.543823 | 0.302570  | 2.106231  | C    | -3.795032 | -2.023677 | -0.722594 |
| C  | -2.156234 | 4.117339  | 2.418353  | C    | -4.174686 | -1.227250 | 0.356522  |
| H  | -0.257997 | 4.372945  | 1.425344  | C    | -4.577313 | -2.106208 | -1.872639 |
| C  | -3.100954 | 3.208898  | 2.901033  | C    | -5.350747 | -0.478887 | 0.274050  |
| H  | -3.589930 | 1.097838  | 3.140693  | H    | -3.547174 | -1.186900 | 1.248371  |
| H  | -2.342805 | 5.185829  | 2.489569  | C    | -5.744246 | -1.347098 | -1.954172 |
| H  | -4.025331 | 3.572375  | 3.342405  | H    | -4.258222 | -2.774303 | -2.669633 |
| C  | 1.489889  | 2.970205  | -0.087657 | C    | -6.128211 | -0.532417 | -0.883730 |
| C  | 1.388124  | 3.028886  | -1.479339 | H    | -5.658818 | 0.141246  | 1.112893  |
| C  | 2.231677  | 3.933634  | 0.606836  | H    | -6.363383 | -1.394741 | -2.846986 |
| C  | 2.031516  | 4.051510  | -2.179005 | H    | -7.041879 | 0.052830  | -0.949913 |
| H  | 0.809570  | 2.270228  | -2.005037 | C    | 0.734892  | 3.028825  | -0.256367 |
| C  | 2.874024  | 4.952106  | -0.094902 | C    | 0.078637  | 2.545492  | 0.894754  |
| H  | 2.317148  | 3.868918  | 1.691218  | C    | 0.378439  | 3.105749  | 2.140693  |
| C  | 2.776275  | 5.007693  | -1.488514 | C    | 1.319446  | 4.128325  | 2.260557  |
| H  | 1.948209  | 4.096957  | -3.261677 | C    | 1.955695  | 4.622962  | 1.123756  |
| H  | 3.452899  | 5.699605  | 0.441285  | C    | 1.648189  | 4.082494  | -0.122341 |
| H  | 3.280814  | 5.800932  | -2.034130 | C    | 0.469874  | 2.505633  | -1.635395 |
| Pd | -0.058379 | -0.306659 | -0.460134 | C    | 0.891697  | 1.238104  | -2.087282 |
| C  | -1.732859 | -2.078550 | -0.422317 | C    | 0.571122  | 0.826324  | -3.384923 |
| C  | -1.882843 | -1.065854 | -1.393503 | C    | -0.146955 | 1.659263  | -4.241620 |
| C  | -2.046783 | 0.276166  | -0.937556 | C    | -0.536071 | 2.927403  | -3.812782 |
| H  | -1.865234 | -1.335262 | -2.449305 | C    | -0.219024 | 3.343532  | -2.522361 |
| H  | -2.525751 | 0.390211  | 0.037083  | H    | -0.132542 | 2.744955  | 3.029280  |
| C  | -2.056249 | 1.466455  | -1.805840 | H    | 1.541795  | 4.543623  | 3.240004  |
| C  | -1.563207 | 1.442877  | -3.123097 | H    | 2.688099  | 5.421583  | 1.203812  |

|   |           |           |           |      |           |           |           |
|---|-----------|-----------|-----------|------|-----------|-----------|-----------|
| H | 2.144219  | 4.450036  | -1.017893 | C    | 4.943806  | 2.748989  | -0.744536 |
| H | 0.884165  | -0.156433 | -3.726900 | H    | 3.689343  | 1.912230  | -2.292043 |
| H | -0.393790 | 1.316923  | -5.242882 | C    | 5.219654  | 2.782904  | 0.625901  |
| H | -1.094678 | 3.585537  | -4.472676 | H    | 4.691338  | 2.020268  | 2.574838  |
| H | -0.540689 | 4.319302  | -2.165005 | H    | 5.517909  | 3.364948  | -1.431963 |
| P | -1.105999 | 1.119347  | 0.735273  | H    | 6.011724  | 3.425377  | 1.002200  |
| P | 1.793134  | 0.092321  | -0.940906 | Pd   | 0.207818  | -0.912301 | 0.514775  |
| C | -2.315546 | 1.768026  | -0.493948 | C    | -1.037258 | -3.509345 | 1.688109  |
| C | -2.640745 | 0.982052  | -1.601879 | C    | 0.049681  | -2.682335 | 1.921078  |
| C | -2.838850 | 3.061086  | -0.361058 | C    | 1.222035  | -2.644980 | 1.075458  |
| C | -3.519077 | 1.486002  | -2.564576 | H    | 0.018946  | -2.084415 | 2.834500  |
| H | -2.197166 | -0.008190 | -1.705282 | H    | 1.217366  | -3.349452 | 0.237827  |
| C | -3.711172 | 3.558565  | -1.327182 | C    | 2.570918  | -2.334327 | 1.600468  |
| H | -2.548342 | 3.676402  | 0.490504  | C    | 2.783969  | -1.776666 | 2.874711  |
| C | -4.052984 | 2.766964  | -2.427892 | C    | 3.694191  | -2.589961 | 0.794220  |
| H | -3.780032 | 0.870707  | -3.421604 | C    | 4.068150  | -1.452989 | 3.307843  |
| H | -4.120237 | 4.560674  | -1.226068 | H    | 1.937128  | -1.586502 | 3.530864  |
| H | -4.733683 | 3.155694  | -3.181378 | C    | 4.974733  | -2.243841 | 1.218574  |
| C | -2.005008 | 1.064558  | 2.353004  | H    | 3.548944  | -3.056534 | -0.178827 |
| C | -3.335099 | 1.463584  | 2.512114  | C    | 5.169588  | -1.668909 | 2.476310  |
| C | -1.327439 | 0.493264  | 3.441144  | H    | 4.209315  | -1.024886 | 4.297539  |
| C | -3.980371 | 1.282652  | 3.738381  | H    | 5.823288  | -2.433087 | 0.565509  |
| H | -3.875868 | 1.890441  | 1.671666  | H    | 6.169184  | -1.404370 | 2.810340  |
| C | -1.965193 | 0.332495  | 4.670034  | C    | -2.207207 | -3.556605 | 2.622880  |
| H | -0.293179 | 0.171406  | 3.306184  | H    | -2.329272 | -2.598735 | 3.142281  |
| C | -3.299477 | 0.720732  | 4.817574  | H    | -3.135160 | -3.794486 | 2.096428  |
| H | -5.019388 | 1.583340  | 3.847265  | H    | -2.044021 | -4.336963 | 3.378528  |
| H | -1.427223 | -0.104955 | 5.507108  | H    | -0.920634 | -4.337496 | 0.991378  |
| H | -3.805159 | 0.581799  | 5.769266  | O    | -2.427173 | -4.114689 | -1.508854 |
| C | 2.564289  | -1.200085 | -2.010090 |      |           |           |           |
| C | 1.741022  | -2.267329 | -2.401674 |      |           |           |           |
| C | 3.927070  | -1.217599 | -2.321529 | INT6 |           |           |           |
| C | 2.286570  | -3.340115 | -3.106984 | S    | -4.496611 | 0.785092  | 2.107351  |
| H | 0.683572  | -2.264726 | -2.125865 | O    | -5.243313 | -0.025831 | 3.070482  |
| C | 4.467797  | -2.301038 | -3.017439 | C    | -5.273588 | 0.578066  | 0.518637  |
| H | 4.575433  | -0.410276 | -1.992652 | C    | -5.090161 | 1.559669  | -0.457166 |
| C | 3.650901  | -3.362209 | -3.408627 | C    | -6.033100 | -0.565868 | 0.277117  |
| H | 1.644751  | -4.164754 | -3.405040 | C    | -5.675572 | 1.379877  | -1.710020 |
| H | 5.530405  | -2.317302 | -3.245911 | H    | -4.498851 | 2.441846  | -0.221730 |
| H | 4.076550  | -4.207343 | -3.943479 | C    | -6.622532 | -0.731187 | -0.977198 |
| C | 3.186026  | 1.136644  | -0.341325 | H    | -6.165494 | -1.292127 | 1.074681  |
| C | 3.458985  | 1.176052  | 1.025542  | C    | -6.442056 | 0.238439  | -1.965957 |
| C | 3.926595  | 1.928996  | -1.228652 | H    | -5.545063 | 2.135301  | -2.480246 |
| C | 4.480177  | 1.996745  | 1.508746  | H    | -7.227590 | -1.610942 | -1.179825 |
| H | 2.860442  | 0.568834  | 1.701533  | H    | -6.906837 | 0.108587  | -2.940173 |
|   |           |           |           | C    | 2.876600  | -1.550807 | -1.409515 |

|   |           |           |           |     |           |           |           |
|---|-----------|-----------|-----------|-----|-----------|-----------|-----------|
| C | 1.524830  | -1.797130 | -1.729714 | C   | 3.540074  | 3.260734  | 1.565587  |
| C | 1.130651  | -1.833770 | -3.071673 | C   | 1.957703  | 3.226815  | 3.870251  |
| C | 2.049379  | -1.612814 | -4.096807 | H   | 0.975890  | 1.522088  | 2.964387  |
| C | 3.387391  | -1.377249 | -3.787880 | C   | 3.723549  | 4.226186  | 2.557766  |
| C | 3.791559  | -1.370512 | -2.455012 | H   | 4.148006  | 3.288362  | 0.665297  |
| C | 3.424375  | -1.533212 | -0.010847 | C   | 2.938176  | 4.208408  | 3.710465  |
| C | 3.279465  | -0.454203 | 0.887962  | H   | 1.334184  | 3.215962  | 4.760155  |
| C | 3.859041  | -0.537108 | 2.159202  | H   | 4.480543  | 4.995040  | 2.426827  |
| C | 4.572357  | -1.668808 | 2.552756  | H   | 3.082384  | 4.963424  | 4.478710  |
| C | 4.732095  | -2.730347 | 1.664042  | C   | 2.888474  | 1.598397  | -1.129382 |
| C | 4.171755  | -2.648610 | 0.391332  | C   | 1.997911  | 1.939718  | -2.150473 |
| H | 0.091723  | -2.036190 | -3.318254 | C   | 4.269650  | 1.677865  | -1.348508 |
| H | 1.718532  | -1.634514 | -5.131736 | C   | 2.488077  | 2.366617  | -3.386281 |
| H | 4.114405  | -1.203116 | -4.576336 | H   | 0.924930  | 1.863786  | -1.973441 |
| H | 4.833227  | -1.188104 | -2.200428 | C   | 4.756275  | 2.106992  | -2.582072 |
| H | 3.746018  | 0.294955  | 2.850338  | H   | 4.958078  | 1.375065  | -0.559592 |
| H | 5.007248  | -1.713550 | 3.547779  | C   | 3.863638  | 2.449188  | -3.602013 |
| H | 5.285141  | -3.618454 | 1.957515  | H   | 1.788651  | 2.636180  | -4.173570 |
| H | 4.280581  | -3.474140 | -0.308786 | H   | 5.828263  | 2.166790  | -2.752375 |
| P | 0.266528  | -1.906252 | -0.372602 | H   | 4.244096  | 2.779086  | -4.565456 |
| P | 2.184298  | 0.978940  | 0.455640  | Pd  | -0.107446 | 0.293160  | 0.475262  |
| C | 0.888178  | -3.280627 | 0.681585  | C   | -2.846007 | 0.043961  | 1.884955  |
| C | 1.025760  | -3.047777 | 2.052574  | C   | -2.174796 | 0.681782  | 0.699723  |
| C | 1.303631  | -4.499372 | 0.131511  | C   | -1.463866 | 1.900699  | 0.804037  |
| C | 1.577156  | -4.032603 | 2.874442  | H   | -2.640841 | 0.405398  | -0.246926 |
| H | 0.725868  | -2.079394 | 2.454562  | H   | -1.349386 | 2.353024  | 1.790966  |
| C | 1.849429  | -5.483252 | 0.954192  | C   | -1.203126 | 2.805360  | -0.340515 |
| H | 1.212847  | -4.662566 | -0.942006 | C   | -1.725111 | 2.585681  | -1.629380 |
| C | 1.988085  | -5.247251 | 2.325032  | C   | -0.355560 | 3.915292  | -0.156822 |
| H | 1.695647  | -3.846505 | 3.938439  | C   | -1.387698 | 3.425569  | -2.692481 |
| H | 2.173038  | -6.429663 | 0.528778  | H   | -2.409226 | 1.756066  | -1.801963 |
| H | 2.421154  | -6.012433 | 2.964091  | C   | -0.020884 | 4.750835  | -1.217424 |
| C | -1.299254 | -2.511448 | -1.143483 | H   | 0.058859  | 4.095226  | 0.834868  |
| C | -1.875308 | -3.750460 | -0.855492 | C   | -0.529590 | 4.508537  | -2.497516 |
| C | -2.033232 | -1.566867 | -1.878807 | H   | -1.805797 | 3.234143  | -3.678363 |
| C | -3.180539 | -4.028817 | -1.274547 | H   | 0.643310  | 5.594501  | -1.047068 |
| H | -1.324872 | -4.486256 | -0.274623 | H   | -0.267828 | 5.160577  | -3.326510 |
| C | -3.330661 | -1.844535 | -2.297694 | C   | -2.978347 | -1.471518 | 1.784743  |
| H | -1.589907 | -0.588205 | -2.070960 | H   | -1.976253 | -1.915390 | 1.804504  |
| C | -3.912062 | -3.077430 | -1.983512 | H   | -3.573993 | -1.871385 | 2.609366  |
| H | -3.628500 | -4.988424 | -1.030010 | H   | -3.445758 | -1.752456 | 0.831431  |
| H | -3.900694 | -1.090063 | -2.834415 | H   | -2.348897 | 0.341974  | 2.819488  |
| H | -4.936001 | -3.285833 | -2.283259 | O   | -4.313646 | 2.218155  | 2.326295  |
| C | 2.559702  | 2.276545  | 1.719526  |     |           |           |           |
| C | 1.763209  | 2.271782  | 2.873490  | Prd |           |           |           |

|   |           |           |           |   |           |           |           |
|---|-----------|-----------|-----------|---|-----------|-----------|-----------|
| C | 1.079511  | -0.497771 | -0.662669 | H | -0.446341 | -1.224813 | -2.842064 |
| C | 1.992889  | 0.474050  | -0.531186 | H | -2.042414 | -1.022014 | -2.090670 |
| H | 1.344421  | -1.548181 | -0.544309 | H | -0.912459 | -2.242382 | -1.460846 |
| H | 1.665512  | 1.506947  | -0.664852 | S | -1.207348 | -0.284310 | 0.677221  |
| C | -0.368097 | -0.225307 | -0.937226 | O | -0.676974 | 0.810954  | 1.481446  |
| H | -0.512482 | 0.808797  | -1.276042 | O | -1.149760 | -1.669067 | 1.141458  |
| C | 3.424055  | 0.302380  | -0.238595 | C | -2.901601 | 0.096105  | 0.306770  |
| C | 4.285374  | 1.395722  | -0.412403 | C | -3.280468 | 1.433837  | 0.192640  |
| C | 3.967431  | -0.912685 | 0.210143  | C | -3.811738 | -0.946735 | 0.135419  |
| C | 5.651971  | 1.279499  | -0.166002 | C | -4.606970 | 1.731131  | -0.115579 |
| H | 3.871302  | 2.344709  | -0.747883 | H | -2.545969 | 2.215214  | 0.369382  |
| C | 5.331393  | -1.030304 | 0.456406  | C | -5.136668 | -0.636742 | -0.169022 |
| H | 3.314212  | -1.763460 | 0.386548  | H | -3.471988 | -1.971692 | 0.257752  |
| C | 6.180228  | 0.063661  | 0.266554  | C | -5.529105 | 0.697556  | -0.297573 |
| H | 6.302558  | 2.138139  | -0.308973 | H | -4.924457 | 2.766171  | -0.204015 |
| H | 5.734964  | -1.976321 | 0.807500  | H | -5.863362 | -1.433335 | -0.300552 |
| H | 7.244614  | -0.031019 | 0.463759  | H | -6.562990 | 0.934246  | -0.534090 |
| C | -0.988819 | -1.238920 | -1.892580 |   |           |           |           |

## X-Ray Crystal Structures

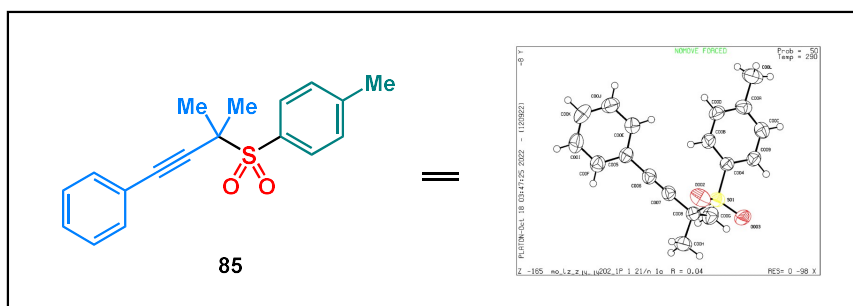

**Table S4** Crystal data and structure refinement for compound **85**

|                                             |                                                               |
|---------------------------------------------|---------------------------------------------------------------|
| Identification code                         | <b>85</b>                                                     |
| Empirical formula                           | C <sub>18</sub> H <sub>18</sub> O <sub>2</sub> S              |
| Formula weight                              | 298.38                                                        |
| Temperature/K                               | 290.0                                                         |
| Crystal system                              | monoclinic                                                    |
| Space group                                 | P2 <sub>1</sub> /n                                            |
| a/Å                                         | 11.7968(3)                                                    |
| b/Å                                         | 7.4154(2)                                                     |
| c/Å                                         | 18.6524(5)                                                    |
| α/°                                         | 90                                                            |
| β/°                                         | 104.9740(10)                                                  |
| γ/°                                         | 90                                                            |
| Volume/Å <sup>3</sup>                       | 1576.27(7)                                                    |
| Z                                           | 4                                                             |
| ρ <sub>calc</sub> /cm <sup>3</sup>          | 1.257                                                         |
| μ/mm <sup>-1</sup>                          | 0.207                                                         |
| F(000)                                      | 632.0                                                         |
| Crystal size/mm <sup>3</sup>                | 0.3 × 0.3 × 0.2                                               |
| Radiation                                   | MoKα (λ = 0.71073)                                            |
| 2θ range for data collection/°              | 4.522 to 55.07                                                |
| Index ranges                                | -13 ≤ h ≤ 15, -9 ≤ k ≤ 9, -24 ≤ l ≤ 24                        |
| Reflections collected                       | 36614                                                         |
| Independent reflections                     | 3618 [R <sub>int</sub> = 0.0655, R <sub>sigma</sub> = 0.0359] |
| Data/restraints/parameters                  | 3618/0/193                                                    |
| Goodness-of-fit on F <sup>2</sup>           | 1.029                                                         |
| Final R indexes [I >= 2σ (I)]               | R <sub>1</sub> = 0.0395, wR <sub>2</sub> = 0.0996             |
| Final R indexes [all data]                  | R <sub>1</sub> = 0.0549, wR <sub>2</sub> = 0.1095             |
| Largest diff. peak/hole / e Å <sup>-3</sup> | 0.18/-0.34                                                    |

## Characterization data of products

### (*E*)-1-methyl-4-((4-phenylbut-3-en-2-yl)sulfonyl)benzene (**3**).

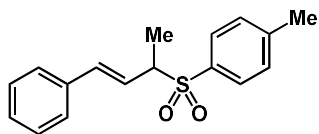

The product (46.4 mg, 81% yield) as white solid was purified with silica gel chromatography (petroleum ether/ethyl acetate = 10/1).  $^1\text{H NMR}$  (400 MHz,  $\text{CDCl}_3$ )  $\delta$  7.64 (d,  $J = 8.0$  Hz, 2H), 7.24-7.18 (m, 7H), 6.26 (d,  $J = 16.0$  Hz, 1H), 6.00 (dd,  $J = 16.0$  Hz, 8.4 Hz, 1H), 3.80-3.72 (m, 1H), 2.34 (s, 3H), 1.45 (d,  $J = 6.8$  Hz, 3H);  $^{13}\text{C NMR}$  (101 MHz,  $\text{CDCl}_3$ )  $\delta$  144.6, 136.3, 135.9, 134.0, 129.5, 129.3, 128.7, 128.3, 126.6, 122.3, 64.1, 21.6, 13.6; HRMS Calculated for  $\text{C}_{17}\text{H}_{18}\text{O}_2\text{S}$  ( $\text{M}+\text{Na}^+$ ): 309.0920; Found: 309.0917.

### $^1\text{H NMR}$ spectrum (400 MHz, $\text{CDCl}_3$ ) of compound **3**

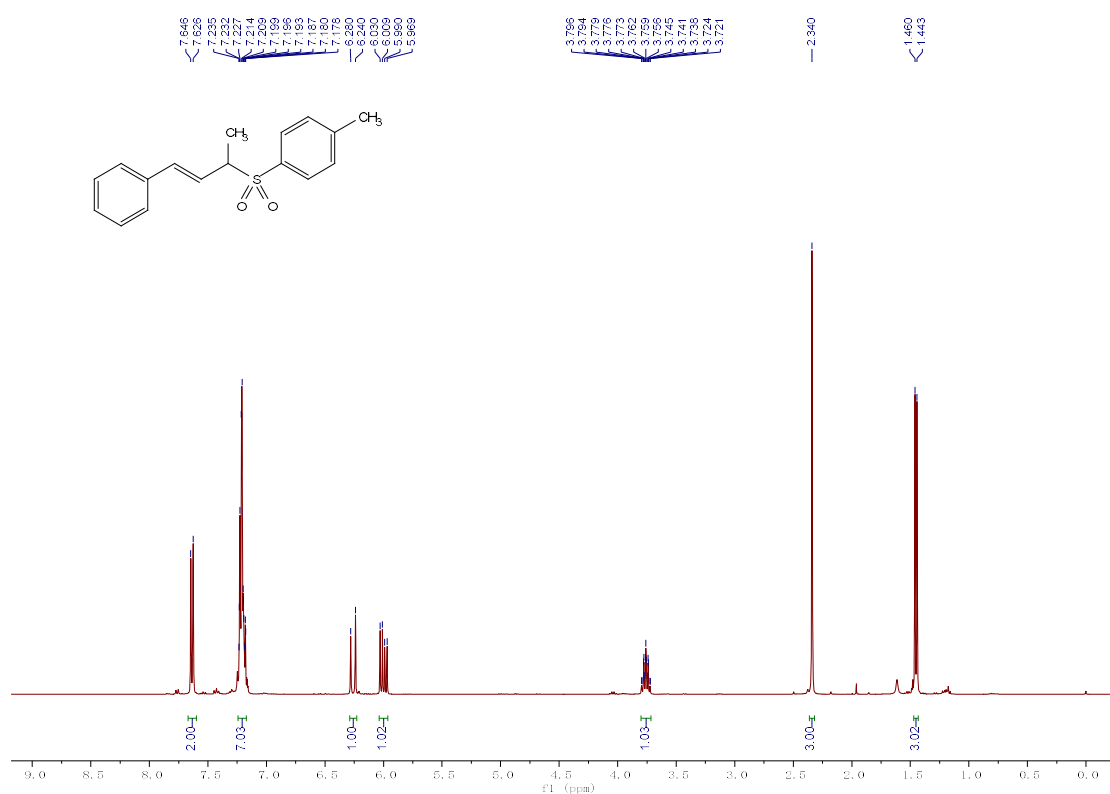



<sup>13</sup>C NMR spectrum (101 MHz, CDCl<sub>3</sub>) of compound 3

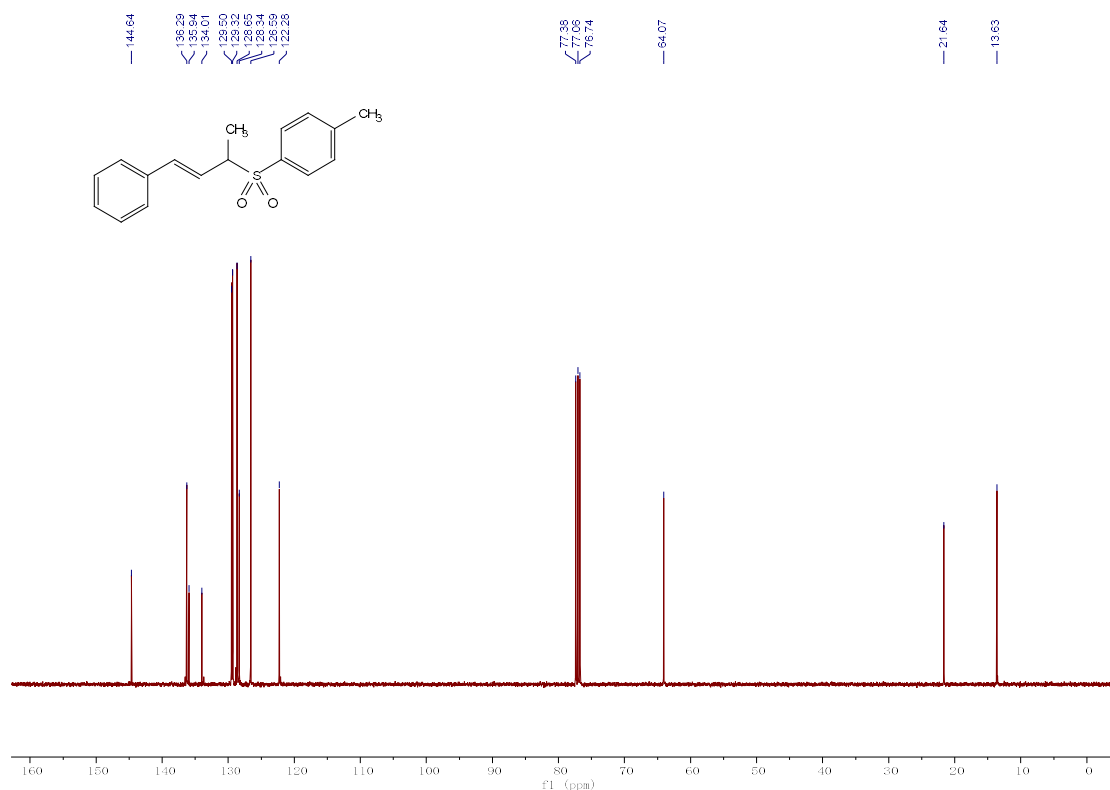

methyl (*E*)-3-(4-((4-phenylbut-3-en-2-yl)sulfonyl)phenyl)propanoate (4).

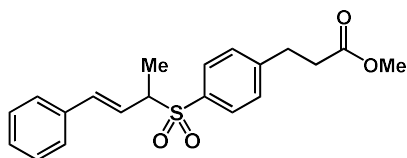

The product (58.1 mg, 81% yield) as yellow solid was purified with silica gel chromatography (petroleum ether/ethyl acetate = 3/1). <sup>1</sup>H NMR (400 MHz, CDCl<sub>3</sub>) δ 7.69-7.65 (m, 2H), 7.27-7.18 (m, 7H), 6.24 (d, *J* = 16.0 Hz, 1H), 5.99 (dd, *J* = 16.0 Hz, 8.4 Hz, 1H), 3.80-3.73 (m, 1H), 3.56 (s, 3H), 2.94 (t, *J* = 7.6 Hz, 2H), 2.56 (t, *J* = 7.6 Hz, 2H), 1.46 (d, *J* = 6.8 Hz, 3H); <sup>13</sup>C NMR (101 MHz, CDCl<sub>3</sub>) δ 172.6, 147.0, 136.4, 135.8, 134.9, 129.5, 128.8, 128.6, 128.3, 126.5, 122.1, 64.0, 51.7, 34.9, 30.7, 13.5; HRMS Calculated for C<sub>20</sub>H<sub>22</sub>O<sub>4</sub>S (M+Na<sup>+</sup>): 381.1131; Found: 381.1130.

<sup>1</sup>H NMR spectrum (400 MHz, CDCl<sub>3</sub>) of compound 4

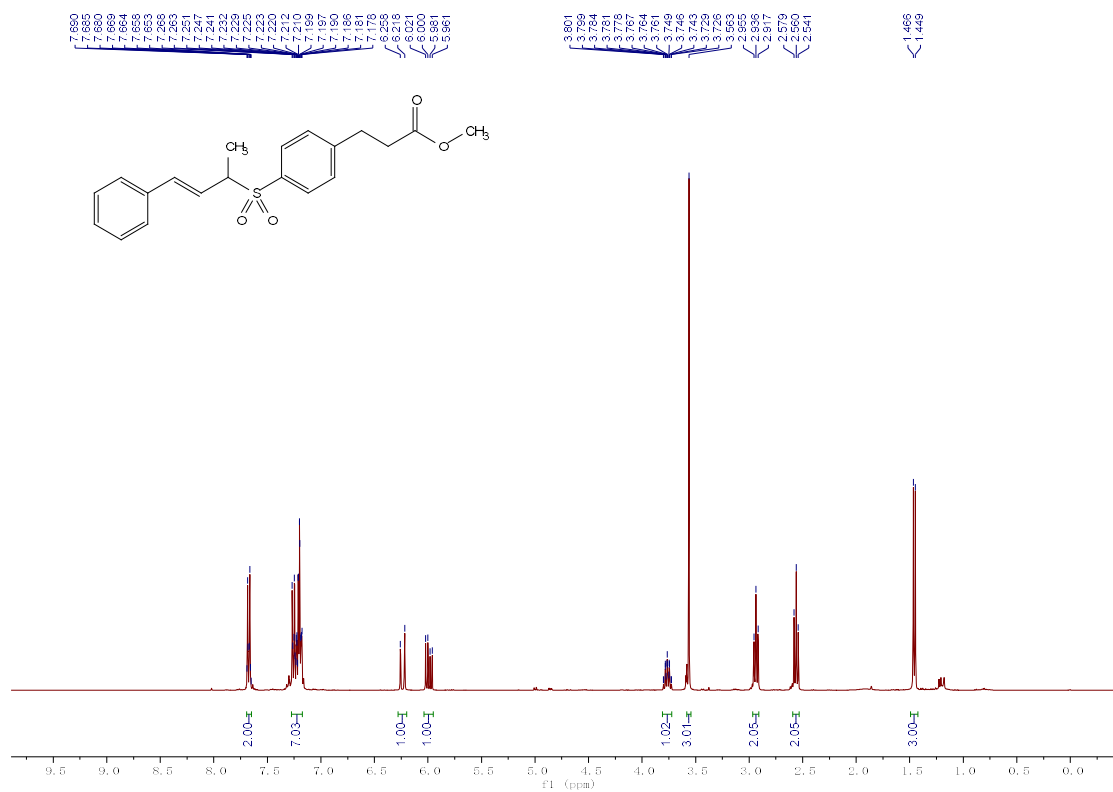

<sup>13</sup>C NMR spectrum (101 MHz, CDCl<sub>3</sub>) of compound 4

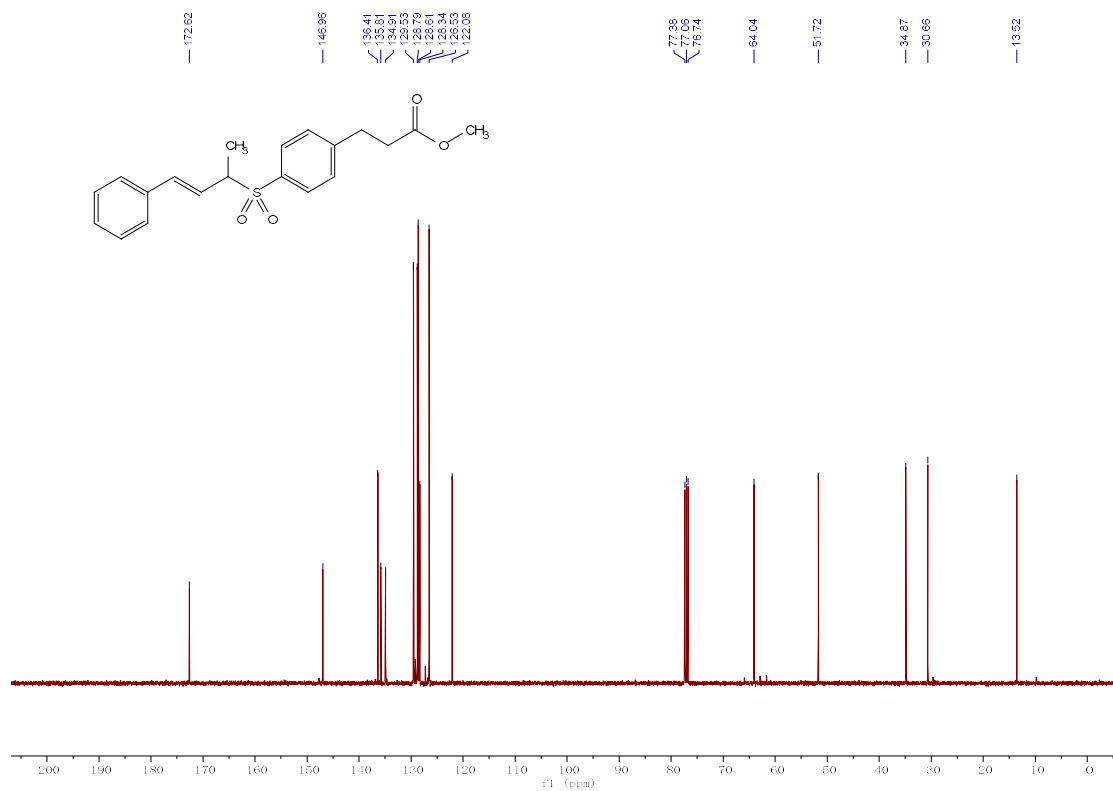

**(E)-1-((4-phenylbut-3-en-2-yl)sulfonyl)-4-(prop-1-en-2-yl)benzene (5)**

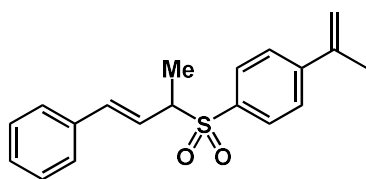

The product (51.9 mg, 83% yield) as light yellow oil was purified with silica gel chromatography (petroleum ether/ethyl acetate = 10/1). <sup>1</sup>H NMR (400 MHz, CDCl<sub>3</sub>) δ 7.71 (d, *J* = 7.6 Hz, 2H), 7.49 (d, *J* = 8.0 Hz, 2H), 7.24-7.18 (m, 5H), 6.27 (d, *J* = 16.0 Hz, 1H), 6.02 (dd, *J* = 15.6 Hz, 8.0 Hz, 1H), 5.40 (s, 1H), 5.16 (s, 1H), 3.82-3.75 (m, 1H), 2.08 (s, 3H), 1.47 (d, *J* = 6.4 Hz, 3H); <sup>13</sup>C NMR (101 MHz, CDCl<sub>3</sub>) δ 146.6, 141.8, 136.5, 135.9, 135.5, 129.4, 128.7, 128.4, 126.6, 125.8, 122.1, 115.8, 64.1, 21.6, 13.6; HRMS Calculated for C<sub>19</sub>H<sub>20</sub>O<sub>2</sub>S (M+Na<sup>+</sup>): 335.1076; Found: 335.1076.

**<sup>1</sup>H NMR spectrum (400 MHz, CDCl<sub>3</sub>) of compound 5**

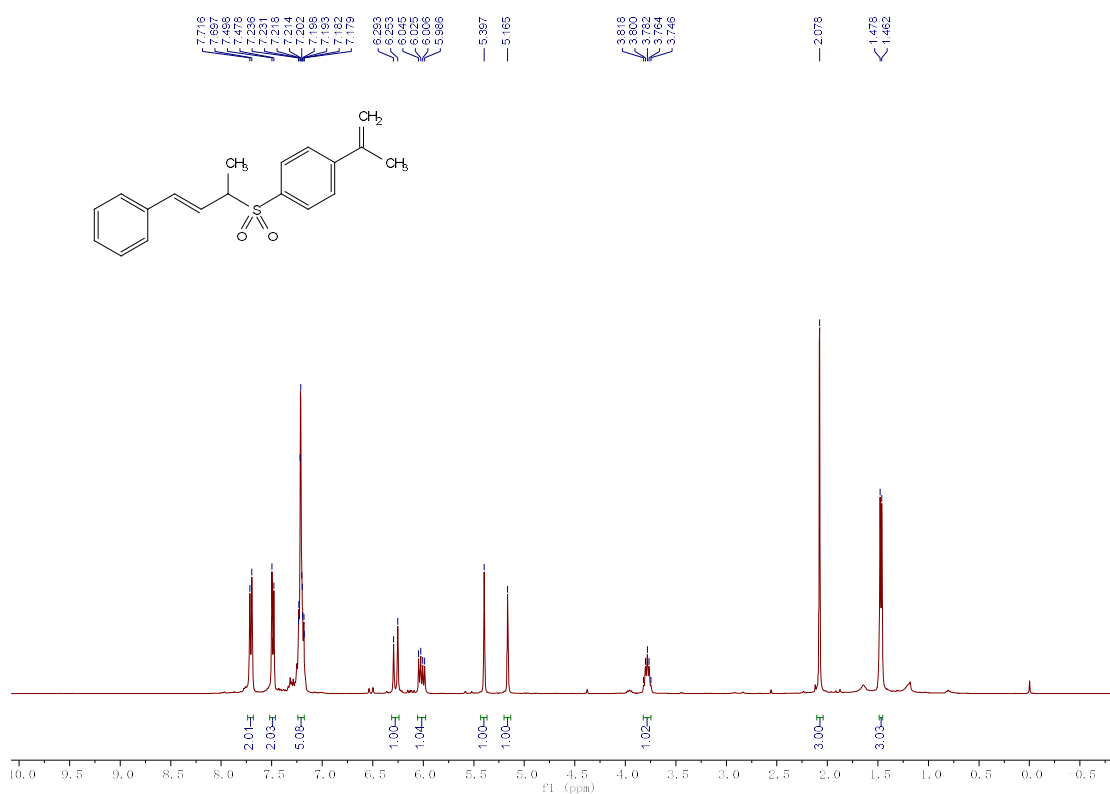

<sup>13</sup>C NMR spectrum (101 MHz, CDCl<sub>3</sub>) of compound 5

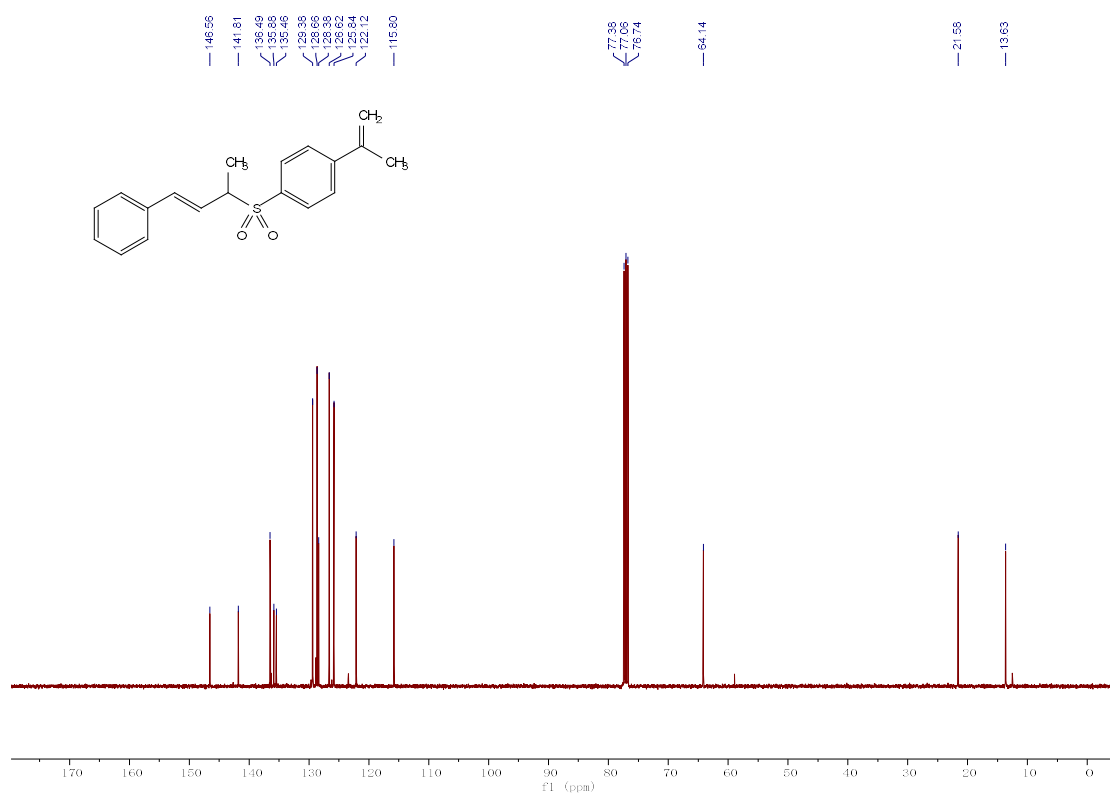

methyl (*E*)-4-((4-phenylbut-3-en-2-yl)sulfonyl)benzoate (6).

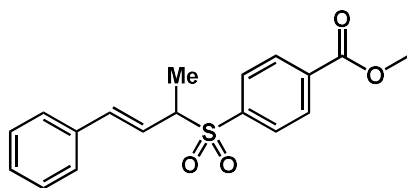

The product (37.0 mg, 56% yield) as white solid was purified with silica gel chromatography (petroleum ether/ethyl acetate = 5/1). <sup>1</sup>H NMR (400 MHz, CDCl<sub>3</sub>) δ 8.09 (d, *J* = 8.4 Hz, 2H), 7.85 (d, *J* = 8.8 Hz, 2H), 7.25-7.17 (m, 5H), 6.24 (d, *J* = 16.0 Hz, 1H), 5.99 (dd, *J* = 16.0 Hz, 8.4 Hz, 1H), 3.88 (s, 3H), 3.85-3.78 (m, 1H), 1.49 (d, *J* = 7.2 Hz, 3H); <sup>13</sup>C NMR (101 MHz, CDCl<sub>3</sub>) δ 165.6, 141.0, 136.9, 135.6, 134.8, 130.0, 129.4, 128.7, 128.6, 126.6, 121.6, 64.2, 52.7, 13.4; HRMS Calculated for C<sub>18</sub>H<sub>18</sub>O<sub>4</sub>S (M+Na<sup>+</sup>): 353.0818; Found: 353.0817.

<sup>1</sup>H NMR spectrum (400 MHz, CDCl<sub>3</sub>) of compound 6

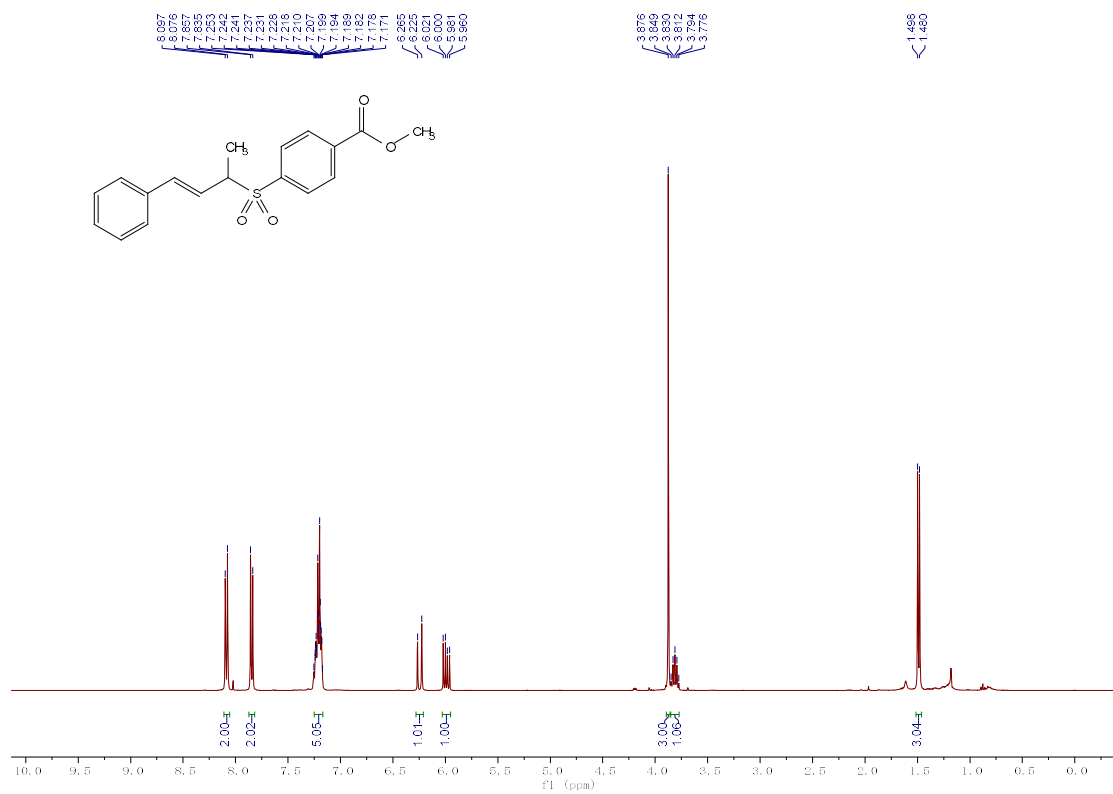

<sup>13</sup>C NMR spectrum (101 MHz, CDCl<sub>3</sub>) of compound 6

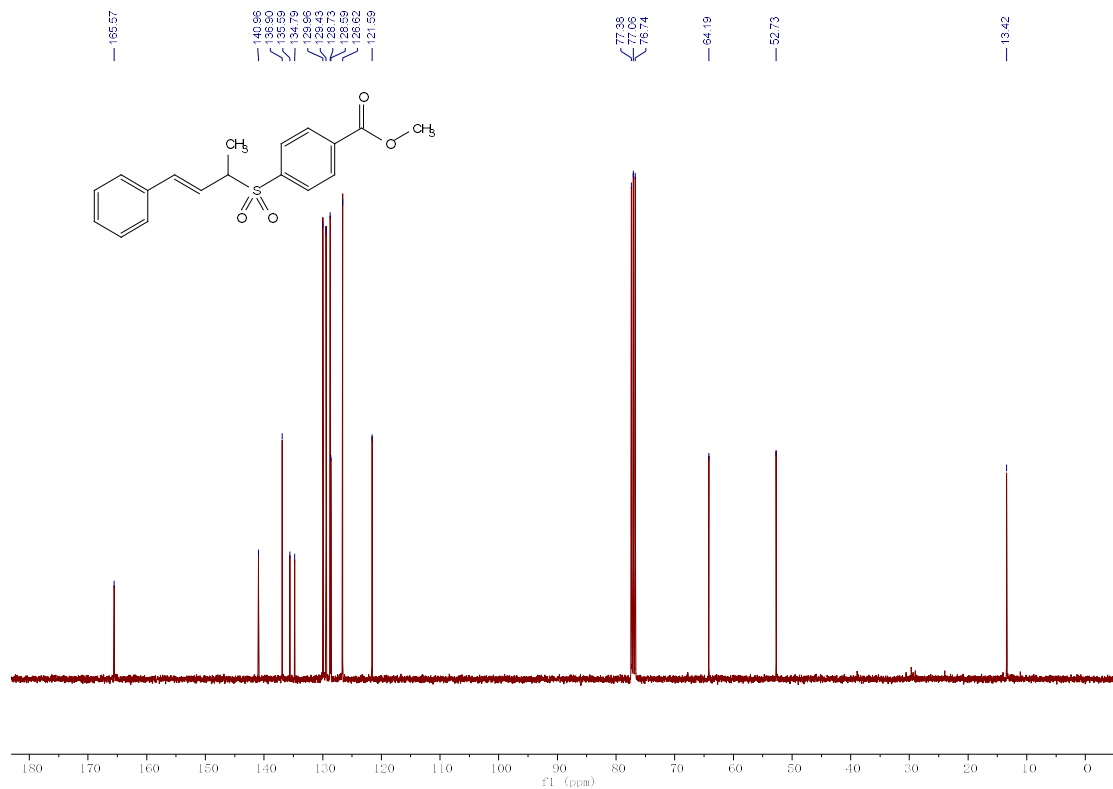



<sup>19</sup>F NMR spectrum (376 MHz, CDCl<sub>3</sub>) of compound 7

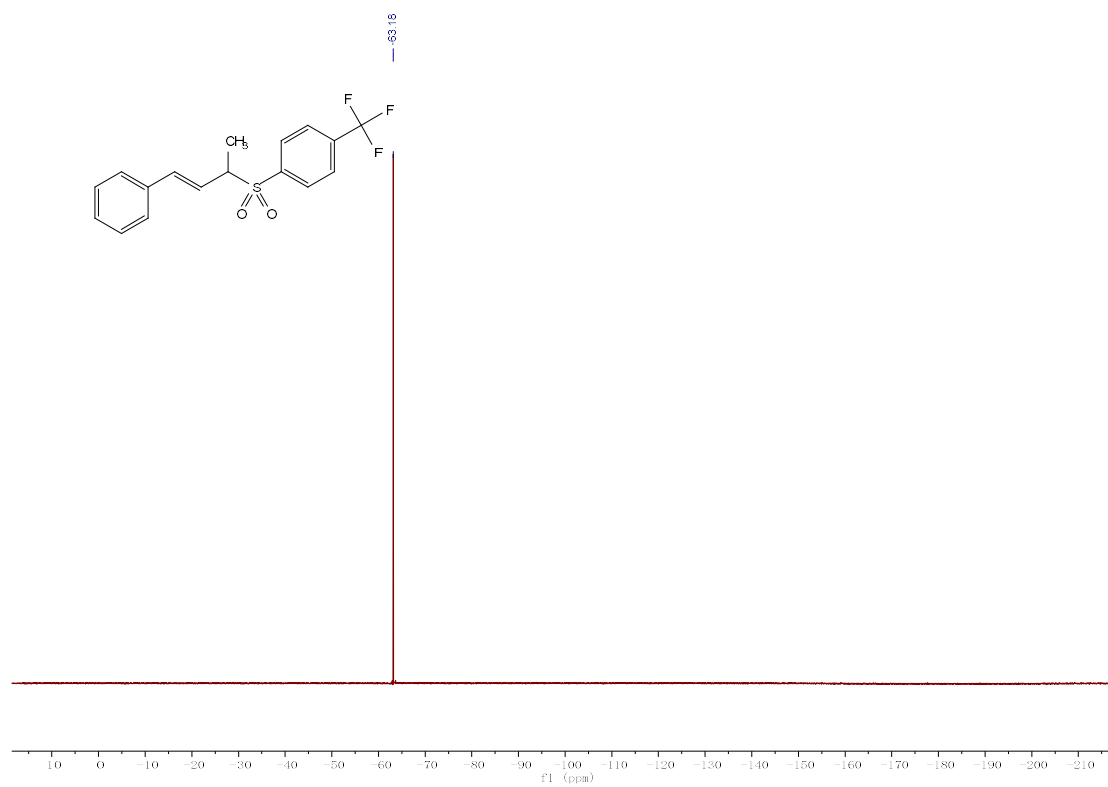

<sup>13</sup>C NMR spectrum (101 MHz, CDCl<sub>3</sub>) of compound 7

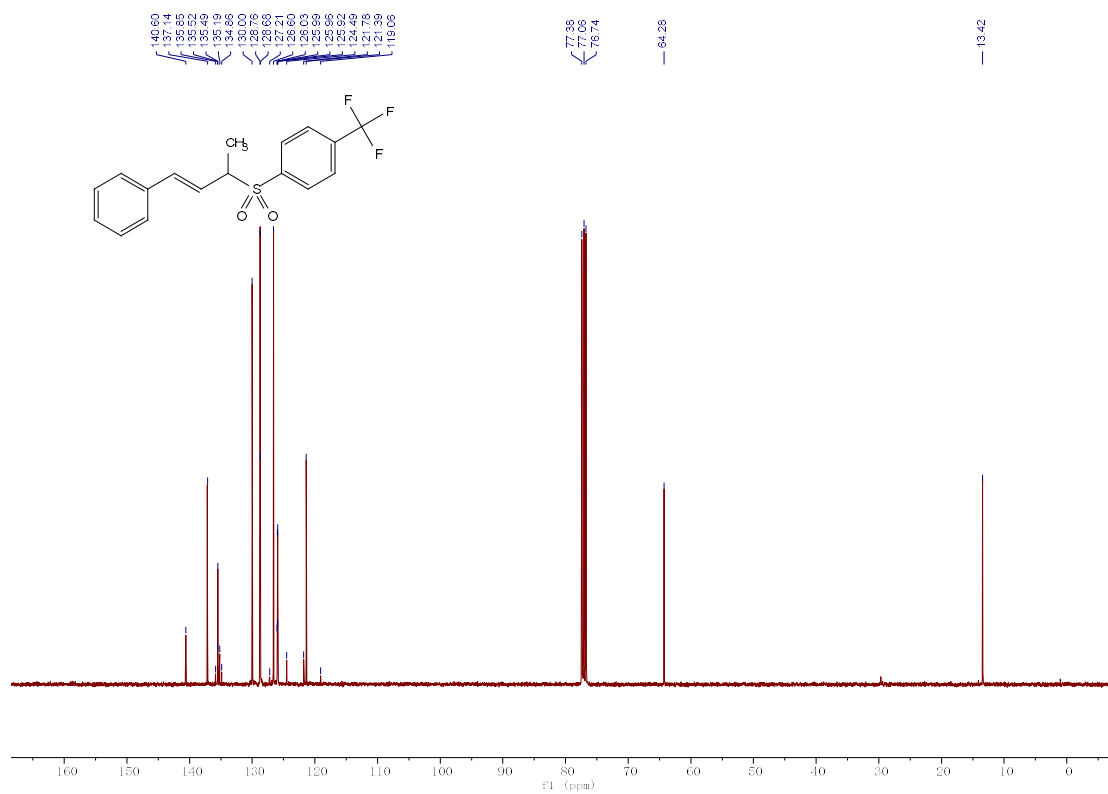





<sup>19</sup>F NMR spectrum (376 MHz, CDCl<sub>3</sub>) of compound **8**

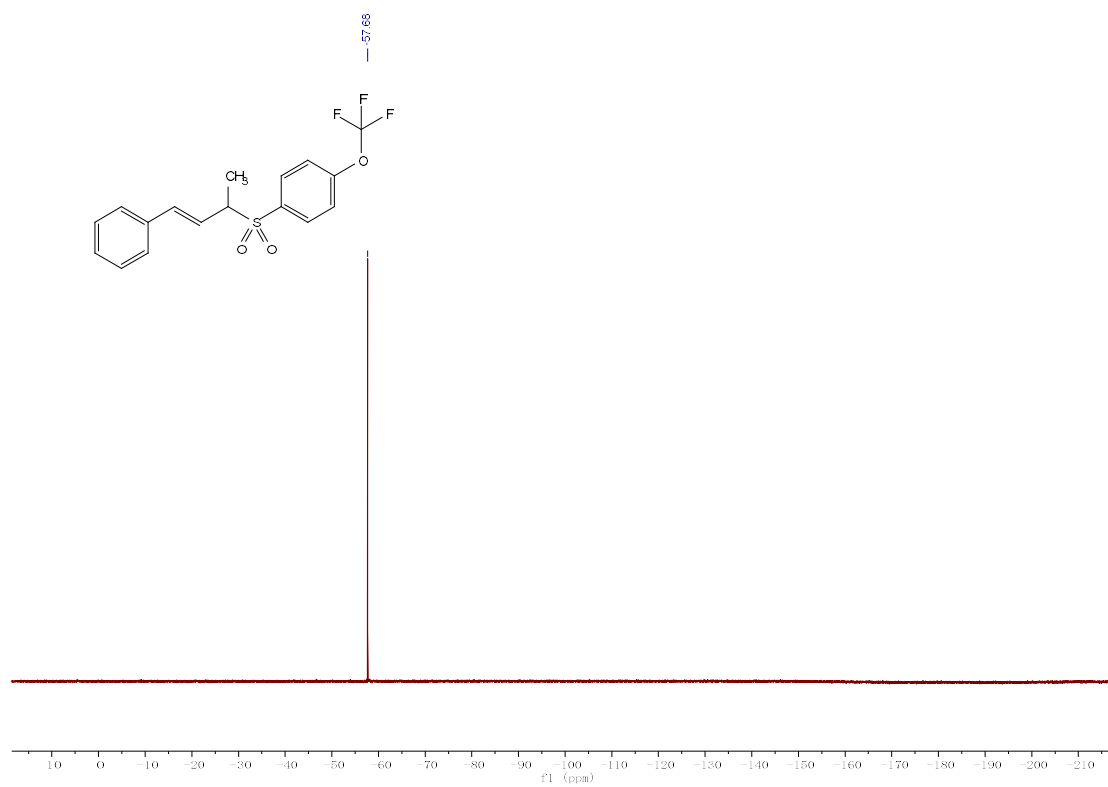

<sup>13</sup>C NMR spectrum (101 MHz, CDCl<sub>3</sub>) of compound **8**

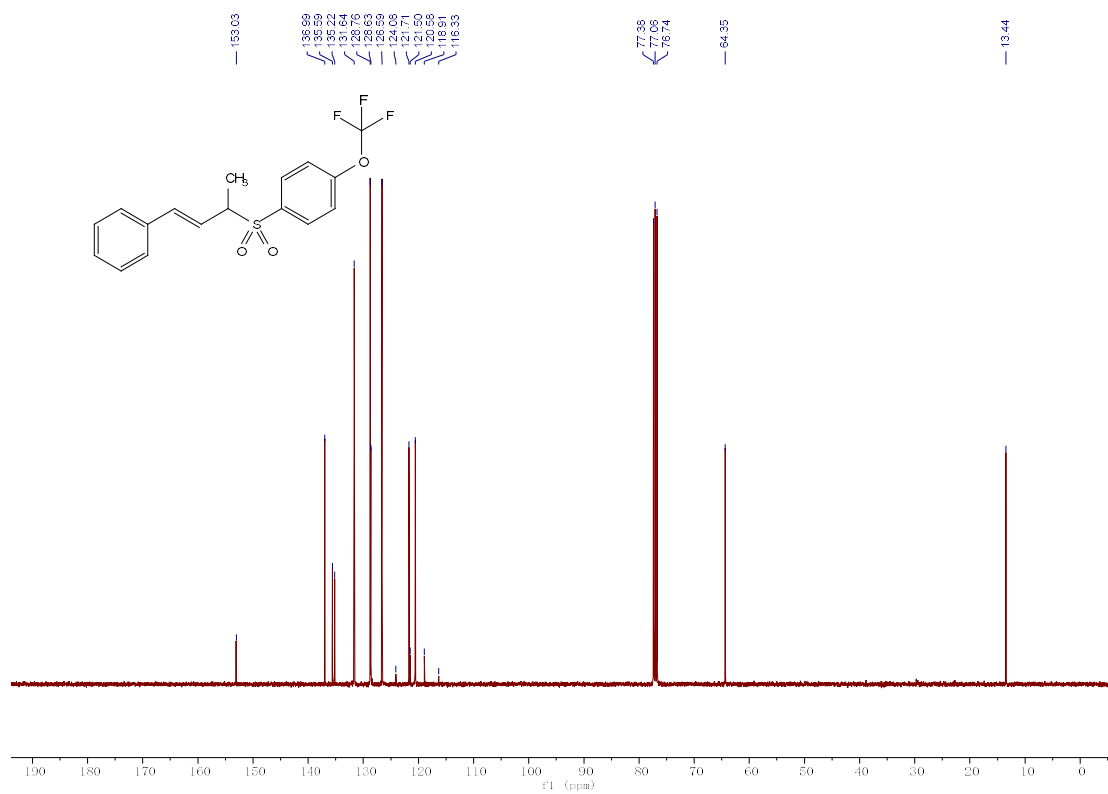

**(E)-4-(4-((4-phenylbut-3-en-2-yl)sulfonyl)phenoxy)butanenitrile (9).**

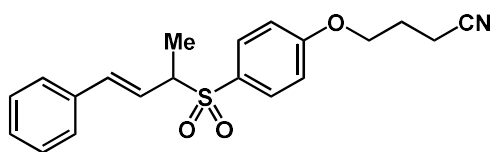

The product (60.4 mg, 85% yield) as yellow oil was purified with silica gel chromatography (petroleum ether/ethyl acetate = 2/1).  $^1\text{H NMR}$  (400 MHz,  $\text{CDCl}_3$ )  $\delta$  7.69-7.66 (m, 2H), 7.24-7.18 (m, 5H), 6.89-6.86 (m, 2H), 6.27 (d,  $J = 16.0$  Hz, 1H), 6.00 (dd,  $J = 16.0$  Hz, 8.0 Hz, 1H), 4.04 (t,  $J = 6.0$  Hz, 2H), 3.79-3.71 (m, 1H), 2.51 (t,  $J = 6.8$  Hz, 2H), 2.11-2.04 (m, 2H), 1.45 (d,  $J = 7.2$  Hz, 3H);  $^{13}\text{C NMR}$  (101 MHz,  $\text{CDCl}_3$ )  $\delta$  162.4, 136.2, 135.8, 131.4, 128.9, 128.6, 128.3, 126.5, 122.2, 118.9, 114.4, 65.7, 64.1, 25.1, 14.1, 13.6; HRMS Calculated for  $\text{C}_{20}\text{H}_{21}\text{NO}_3\text{S}$  ( $\text{M}+\text{Na}^+$ ): 378.1134; Found: 378.1132.

$^1\text{H NMR}$  spectrum (400 MHz,  $\text{CDCl}_3$ ) of compound 9

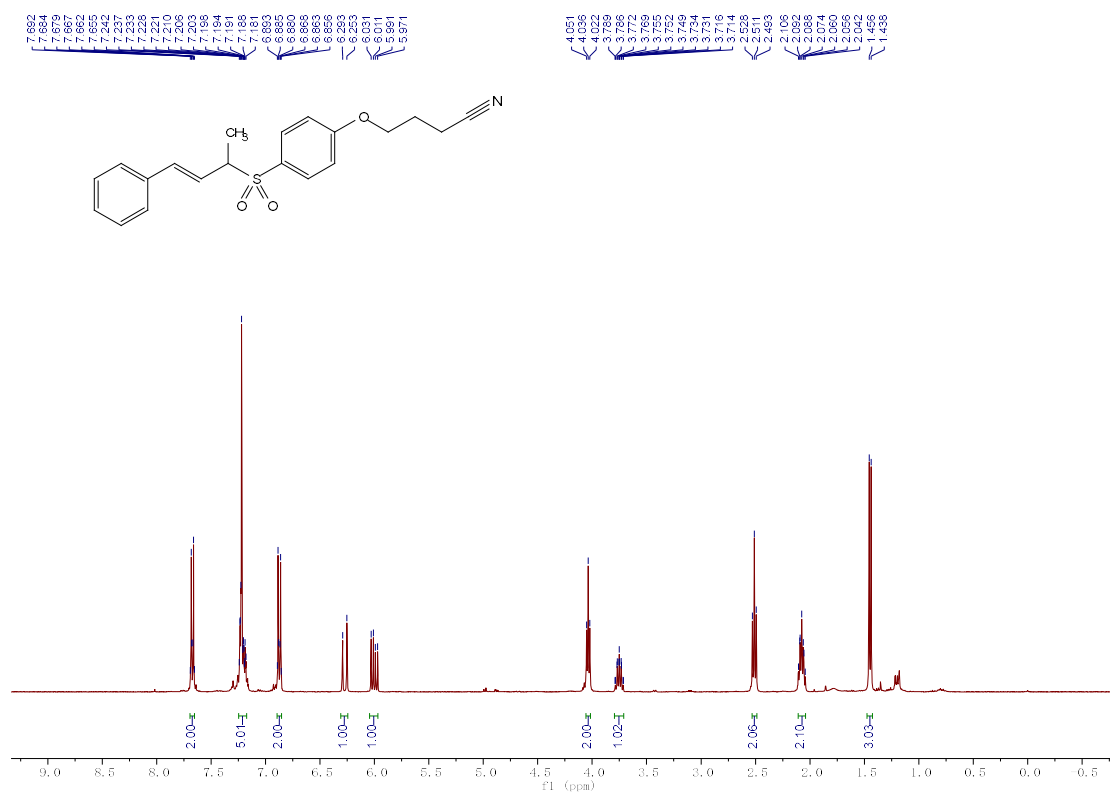

<sup>13</sup>C NMR spectrum (101 MHz, CDCl<sub>3</sub>) of compound 9

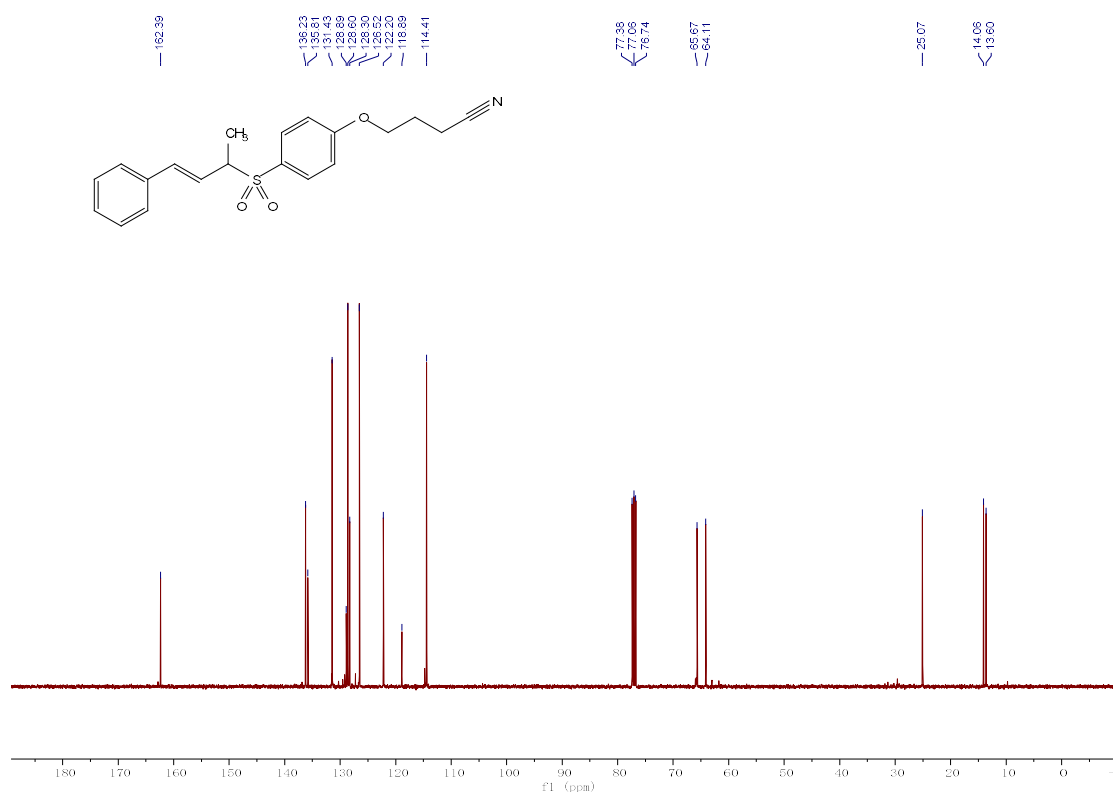

**(E)-1-phenoxy-4-((4-phenylbut-3-en-2-yl)sulfonyl)benzene (10).**

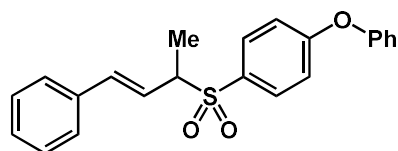

The product (64.9 mg, 89% yield) as white solid was purified with silica gel chromatography (petroleum ether/ethyl acetate = 10/1). <sup>1</sup>H NMR (400 MHz, CDCl<sub>3</sub>) δ 7.80 (d, *J* = 8.8 Hz, 2H), 7.44-7.39 (m, 2H), 7.35-7.29 (m, 5H), 7.26-7.22 (m, 1H), 7.07-7.04 (m, 4H), 6.38 (d, *J* = 16.0 Hz, 1H), 6.11 (dd, *J* = 16.0 Hz, 8.0 Hz, 1H), 3.91-3.84 (m, 1H), 1.58 (d, *J* = 7.2 Hz, 3H); <sup>13</sup>C NMR (101 MHz, CDCl<sub>3</sub>) δ 162.4, 155.0, 136.4, 135.9, 131.6, 130.4, 130.2, 128.7, 128.4, 126.6, 125.1, 122.3, 120.3, 117.3, 64.3, 13.6; HRMS Calculated for C<sub>22</sub>H<sub>20</sub>O<sub>3</sub>S (M+Na<sup>+</sup>): 387.1025; Found: 387.1025.

<sup>1</sup>H NMR spectrum (400 MHz, CDCl<sub>3</sub>) of compound 10

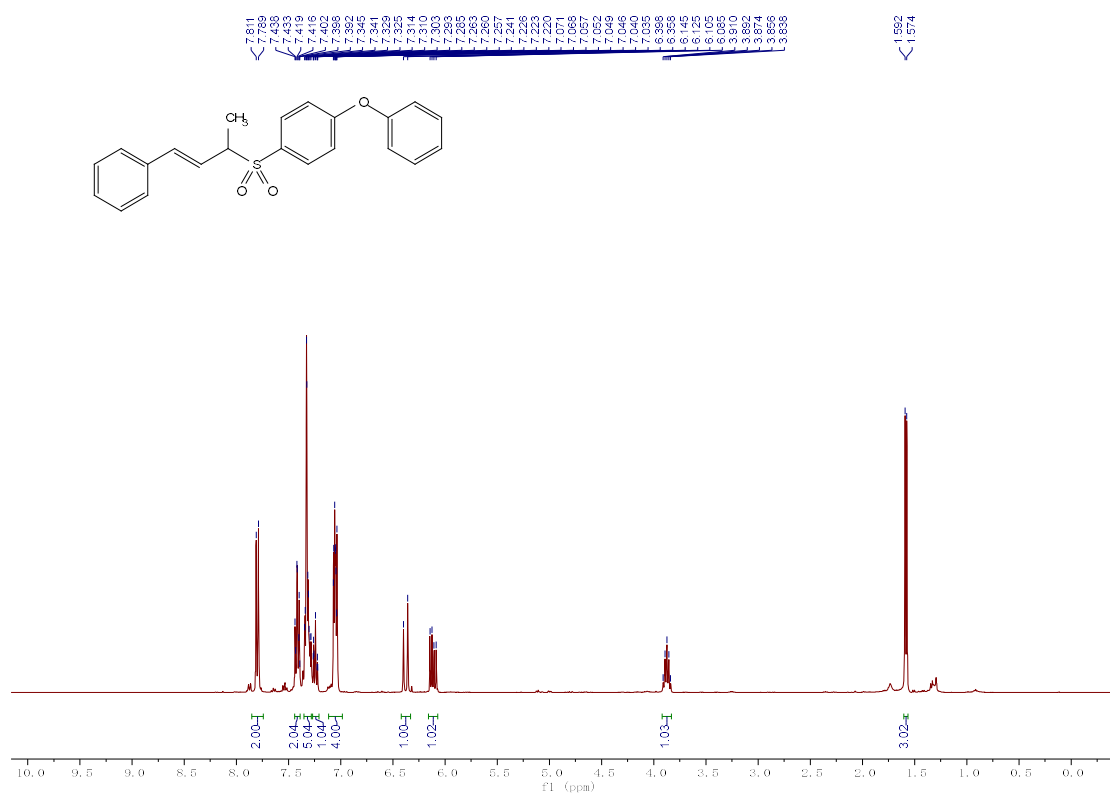

<sup>13</sup>C NMR spectrum (101 MHz, CDCl<sub>3</sub>) of compound 10

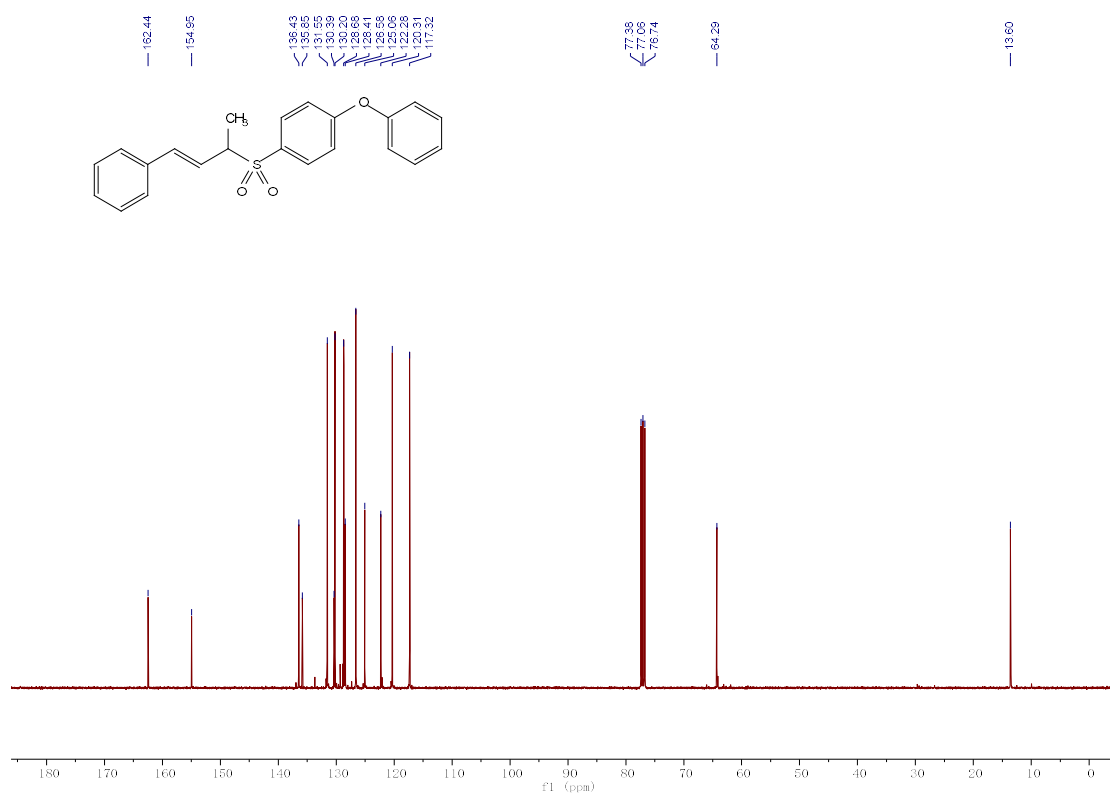

**(E)-5-((4-phenylbut-3-en-2-yl)sulfonyl)-2,3-dihydrobenzofuran (11).**

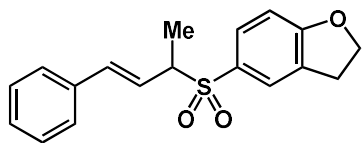

The product (52.8 mg, 84% yield) as yellow oil was purified with silica gel chromatography (petroleum ether/ethyl acetate = 10/1).  $^1\text{H NMR}$  (400 MHz,  $\text{CDCl}_3$ )  $\delta$  7.55-7.51 (m, 2H), 7.24-7.18 (m, 5H), 6.75 (d,  $J = 8.0$  Hz, 1H), 6.26 (d,  $J = 16.0$  Hz, 1H), 6.00 (dd,  $J = 16.0$  Hz, 8.0 Hz, 1H), 4.57 (t,  $J = 8.8$  Hz, 2H), 3.77-3.70 (m, 1H), 3.15-3.06 (m, 2H), 1.45 (d,  $J = 6.8$  Hz, 3H);  $^{13}\text{C NMR}$  (101 MHz,  $\text{CDCl}_3$ )  $\delta$  164.6, 136.2, 135.9, 130.9, 128.6, 128.31, 128.27, 128.1, 126.5, 122.5, 109.3, 72.4, 64.2, 28.8, 13.7; **HRMS** Calculated for  $\text{C}_{18}\text{H}_{18}\text{O}_3\text{S}$  ( $\text{M}+\text{Na}^+$ ): 337.0869; Found: 337.0869.

$^1\text{H NMR}$  spectrum (400 MHz,  $\text{CDCl}_3$ ) of compound **11**

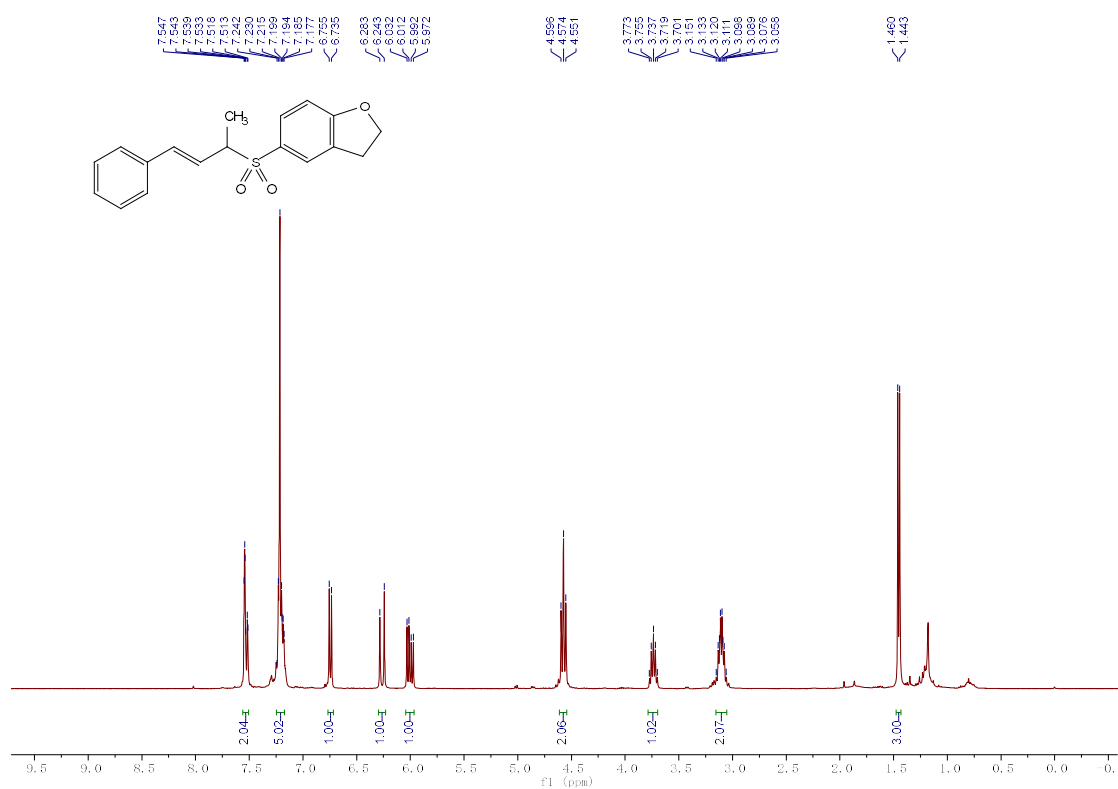

<sup>13</sup>C NMR spectrum (101 MHz, CDCl<sub>3</sub>) of compound **11**

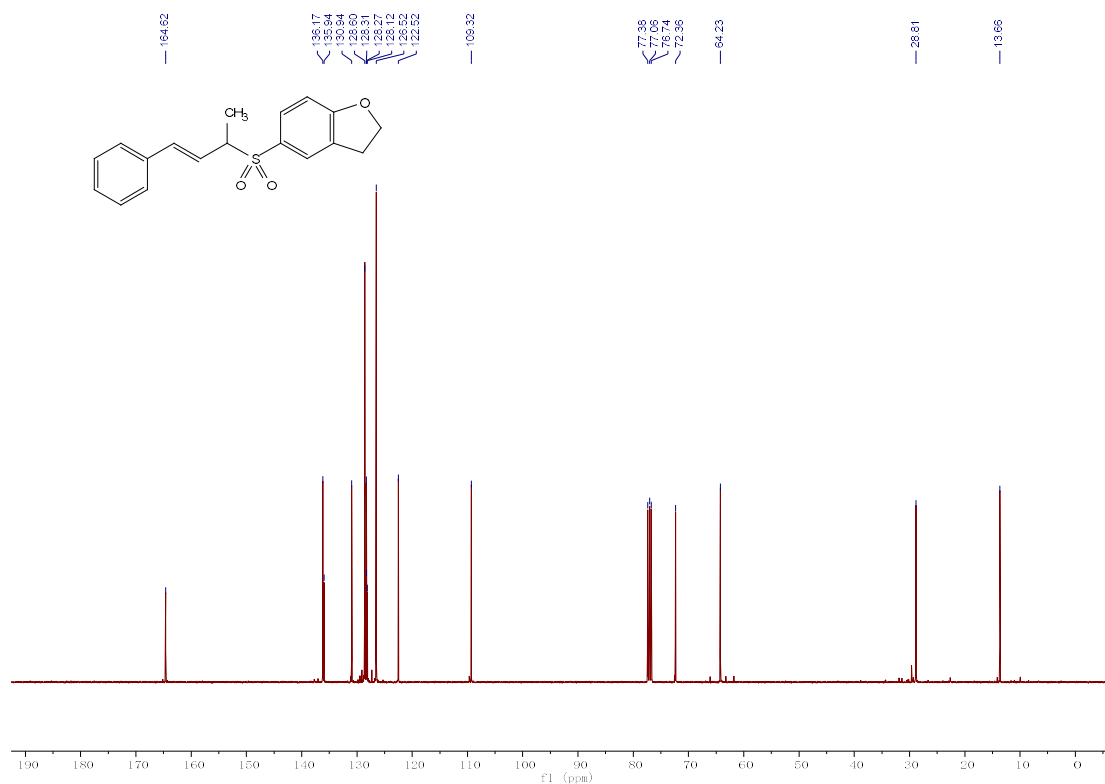

**(E)-methyl(4-((4-phenylbut-3-en-2-yl)sulfonyl)phenyl)sulfane (12).**

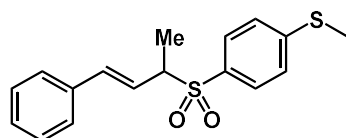

The product (52.2 mg, 82% yield) as white solid was purified with silica gel chromatography (petroleum ether/ethyl acetate = 5/1). <sup>1</sup>H NMR (400 MHz, CDCl<sub>3</sub>) δ 7.62 (d, *J* = 8.4 Hz, 2H), 7.26-7.16 (m, 7H), 6.27 (d, *J* = 16.0 Hz, 1H), 6.00 (dd, *J* = 16.0 Hz, 8.4 Hz, 1H), 3.80-3.72 (m, 1H), 2.42 (s, 3H), 1.46 (d, *J* = 6.8 Hz, 3H); <sup>13</sup>C NMR (101 MHz, CDCl<sub>3</sub>) δ 147.2, 136.4, 135.9, 132.5, 129.6, 128.7, 128.4, 126.6, 125.0, 122.2, 64.2, 14.7, 13.6; HRMS Calculated for C<sub>17</sub>H<sub>18</sub>O<sub>2</sub>S<sub>2</sub> (M+Na<sup>+</sup>): 341.0640; Found: 341.0640.

<sup>1</sup>H NMR spectrum (400 MHz, CDCl<sub>3</sub>) of compound 12

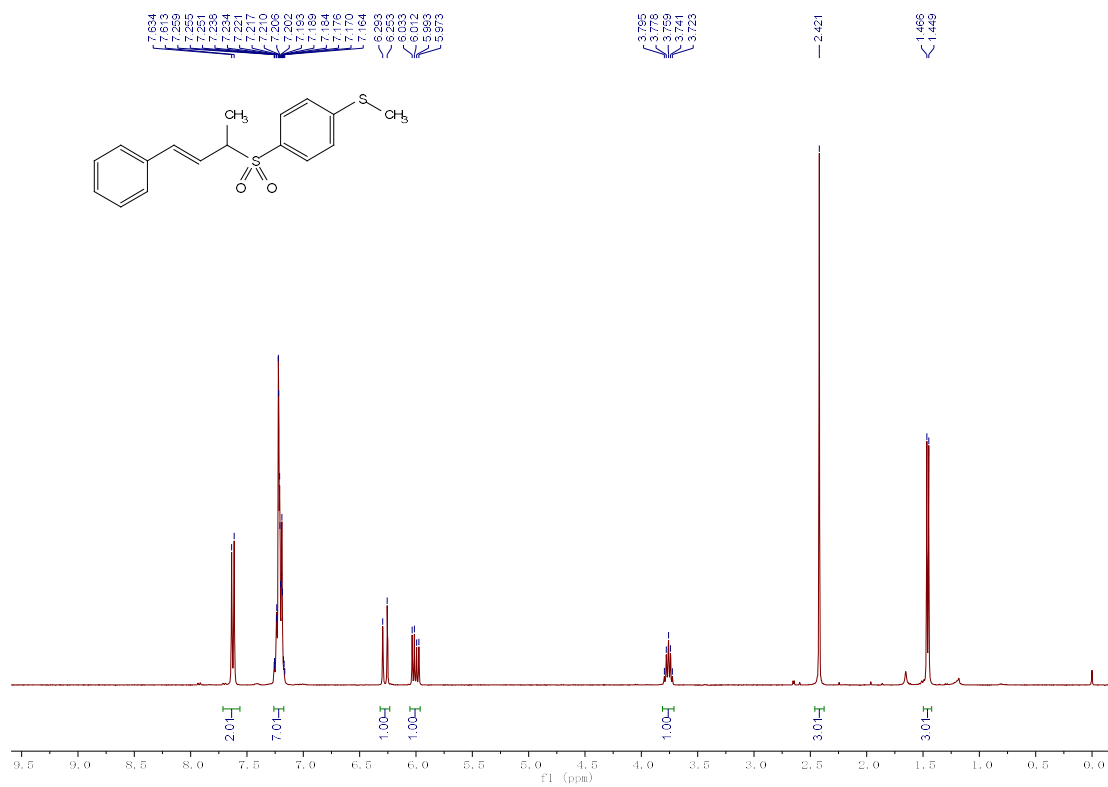

<sup>13</sup>C NMR spectrum (101 MHz, CDCl<sub>3</sub>) of compound 12

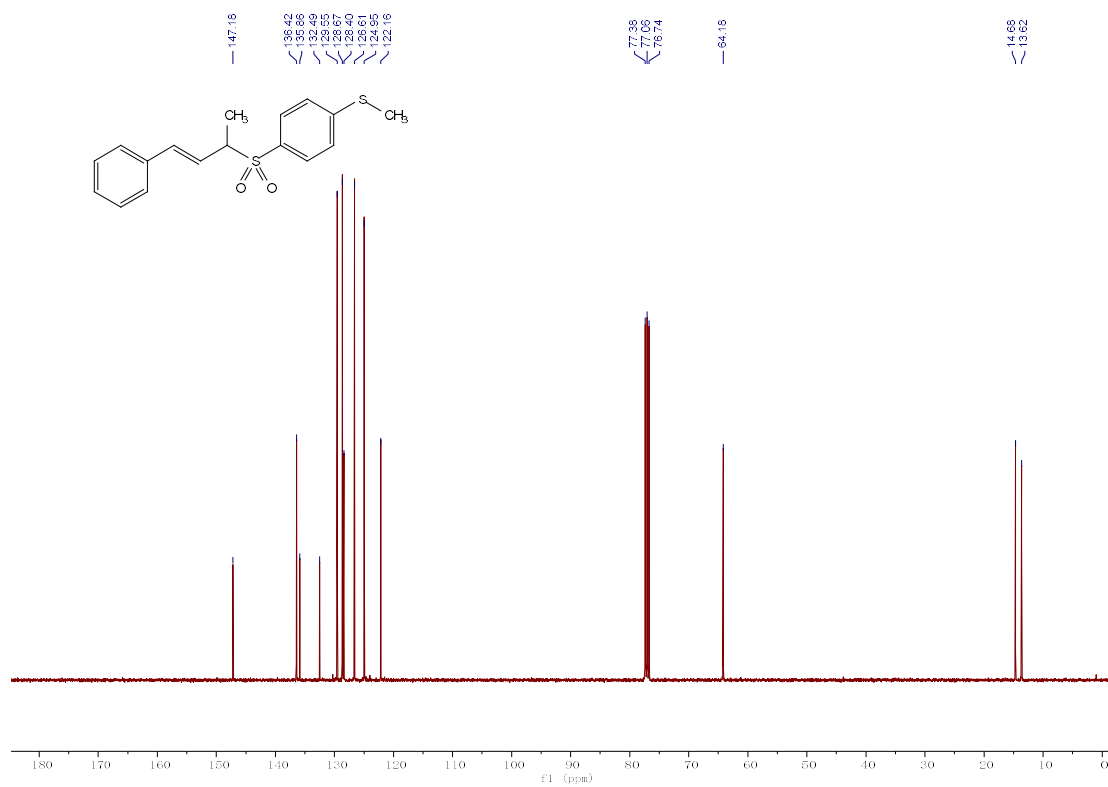

**(E)-1-fluoro-4-((4-phenylbut-3-en-2-yl)sulfonyl)benzene (13).**

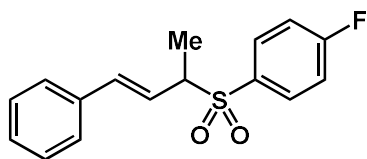

The product (42.4 mg, 73% yield) as white solid was purified with silica gel chromatography (petroleum ether/ethyl acetate = 10/1). **<sup>1</sup>H NMR (400 MHz, CDCl<sub>3</sub>)** δ 7.77 (dd, *J* = 8.4 Hz, 5.2 Hz, 2H), 7.26-7.18 (m, 5H), 7.10 (t, *J* = 8.4 Hz, 2H), 6.24 (d, *J* = 16.0 Hz, 1H), 5.99 (dd, *J* = 16.0 Hz, 8.4 Hz, 1H), 3.81-3.74 (m, 1H), 1.48 (d, *J* = 6.8 Hz, 3H); **<sup>19</sup>F NMR (376 MHz, CDCl<sub>3</sub>)** δ -103.44 (s, 1F); **<sup>13</sup>C NMR (101 MHz, CDCl<sub>3</sub>)** δ 165.9 (d, *J* = 257.6 Hz), 136.7, 135.7, 133.0 (d, *J* = 4.0 Hz), 132.2 (d, *J* = 10.1 Hz), 128.7, 128.5, 126.6, 121.9, 116.2 (d, *J* = 22.2 Hz), 64.3, 13.5; **HRMS** Calculated for C<sub>16</sub>H<sub>15</sub>FO<sub>2</sub>S (M+Na<sup>+</sup>): 313.0669; Found: 313.0666.

**<sup>1</sup>H NMR spectrum (400 MHz, CDCl<sub>3</sub>) of compound 13**

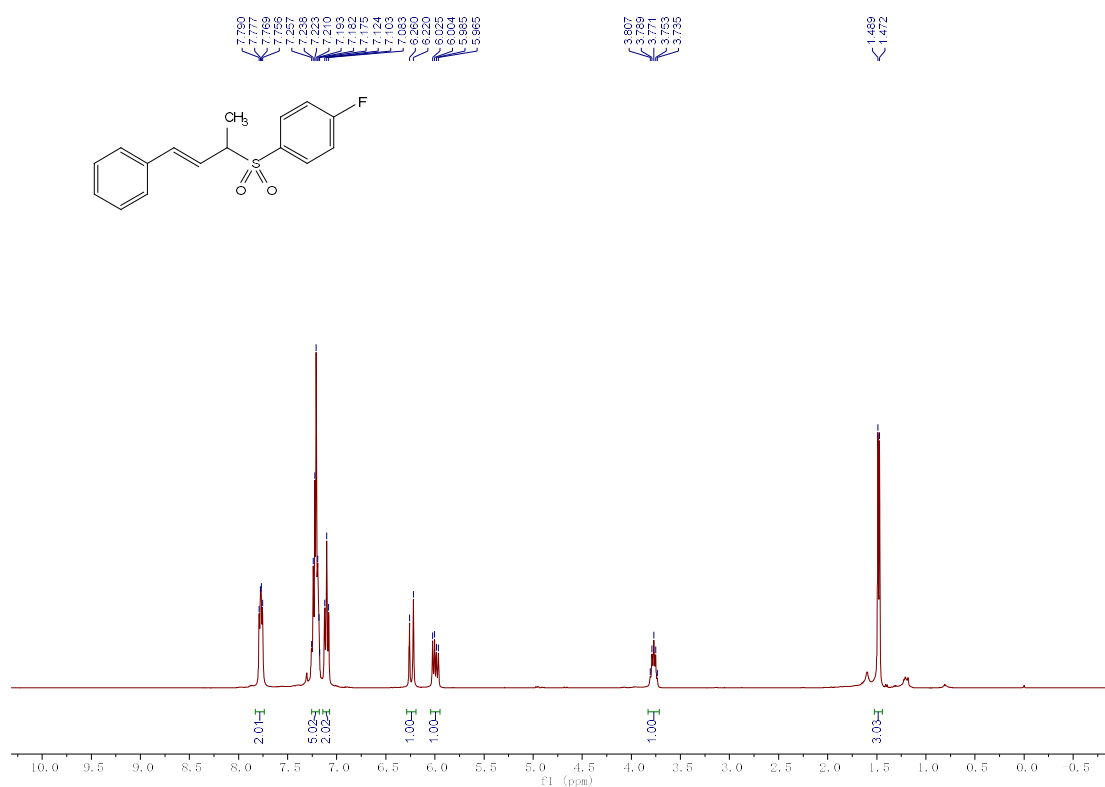



**<sup>19</sup>F NMR spectrum (376 MHz, CDCl<sub>3</sub>) of compound 13**

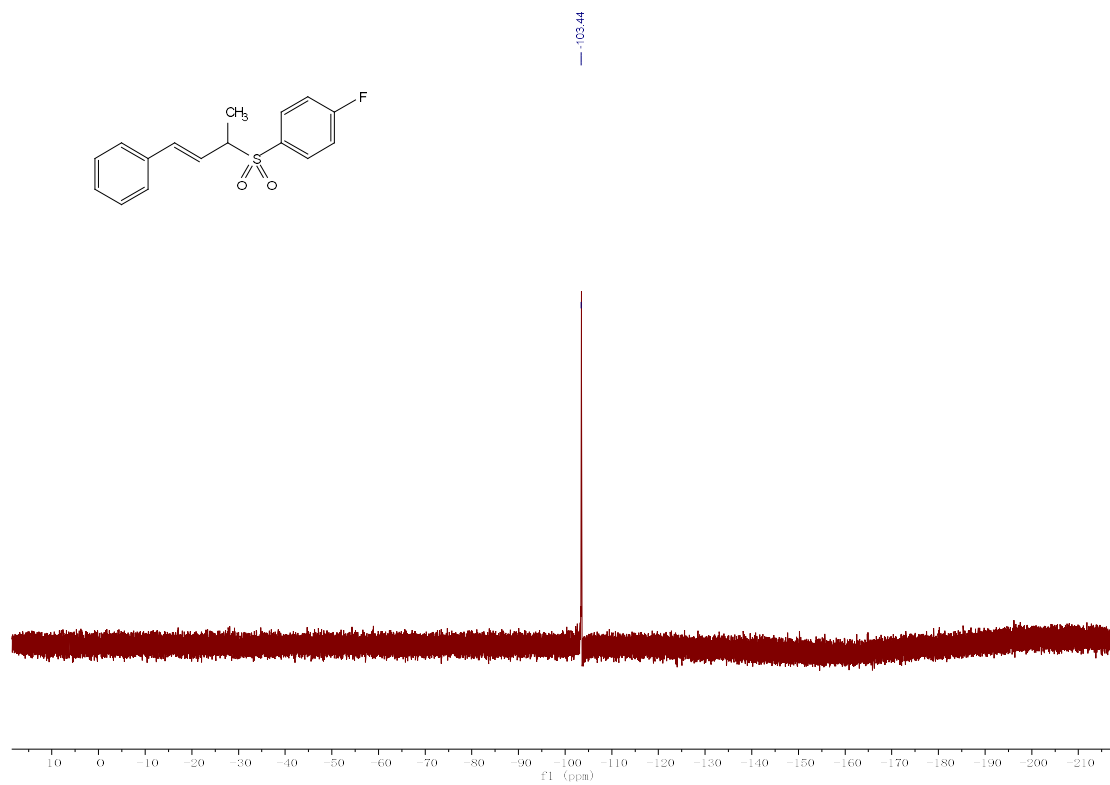

**<sup>13</sup>C NMR spectrum (101 MHz, CDCl<sub>3</sub>) of compound 13**

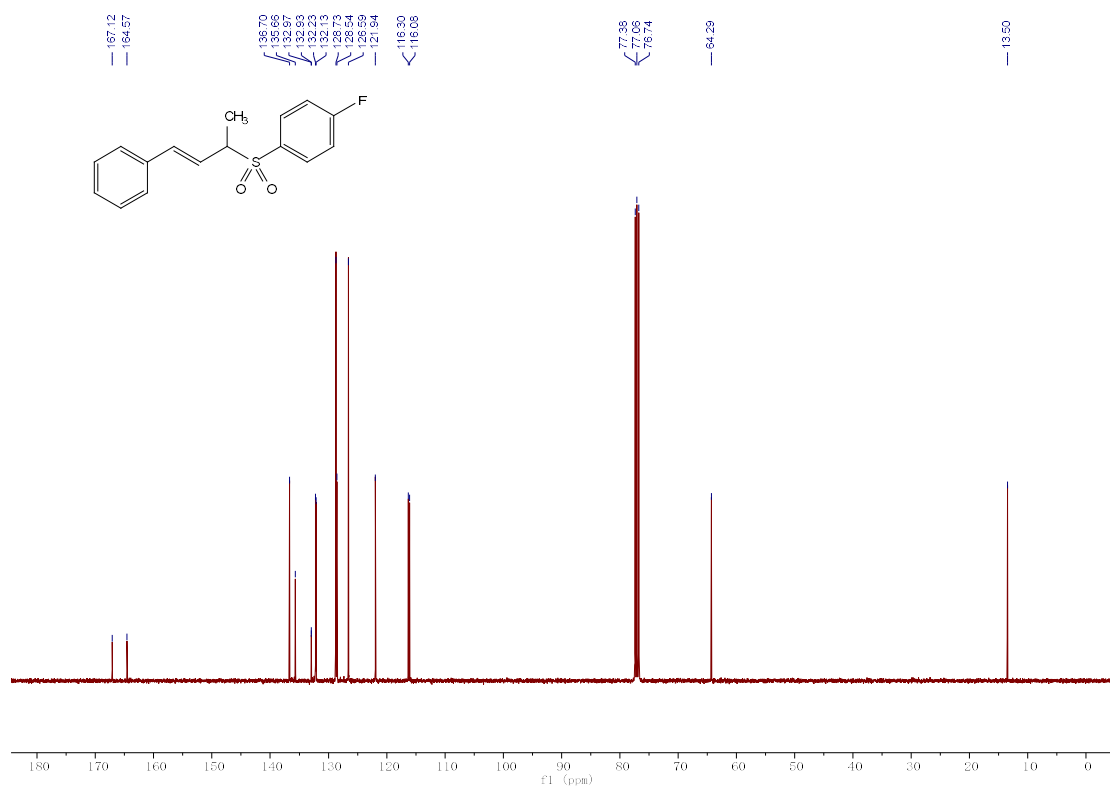

**(E)-2-(4-fluorophenyl)-5-(2-methyl-((4-phenylbut-3-en-2-yl)sulfonyl)benzyl)thiophene (14).**

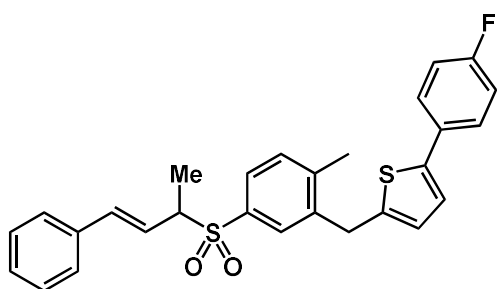

The product (63.9 mg, 67% yield) as light yellow solid was purified with silica gel chromatography (petroleum ether/ethyl acetate = 5/1).  $^1\text{H NMR}$  (400 MHz,  $\text{CDCl}_3$ )  $\delta$  7.62 (s, 1H), 7.57 (d,  $J = 7.6$  Hz, 1H), 7.38 – 7.31 (m, 2H), 7.23 (d,  $J = 7.6$  Hz, 1H), 7.19 – 7.16 (m, 5H), 6.94 (t,  $J = 8.4$  Hz, 2H), 6.83 (d,  $J = 3.6$  Hz, 1H), 6.42 (d,  $J = 2.8$  Hz, 1H), 6.26 (d,  $J = 15.6$  Hz, 1H), 6.00 (dd,  $J = 15.6, 8.0$  Hz, 1H), 4.03 (s, 2H), 3.81 – 3.74 (m, 1H), 2.29 (s, 3H), 1.46 (d,  $J = 6.8$  Hz, 3H);  $^{19}\text{F NMR}$  (376 MHz,  $\text{CDCl}_3$ )  $\delta$  -114.84 (s, 1F);  $^{13}\text{C NMR}$  (101 MHz,  $\text{CDCl}_3$ )  $\delta$  162.1 (d,  $J = 247.5$  Hz), 143.3, 141.9, 141.4, 139.2, 136.3, 135.9, 134.7, 131.0, 130.6 (d,  $J = 3.0$  Hz), 130.1, 128.6, 128.3, 127.8, 127.2 (d,  $J = 8.1$  Hz), 126.6, 126.3, 122.8, 122.3, 115.8 (d,  $J = 22.2$  Hz), 64.2, 33.9, 19.8, 13.6; HRMS Calculated for  $\text{C}_{28}\text{H}_{25}\text{FO}_2\text{S}_2$  ( $\text{M}+\text{Na}^+$ ): 499.1172; Found: 499.1173.

$^1\text{H NMR}$  spectrum (400 MHz,  $\text{CDCl}_3$ ) of compound 14

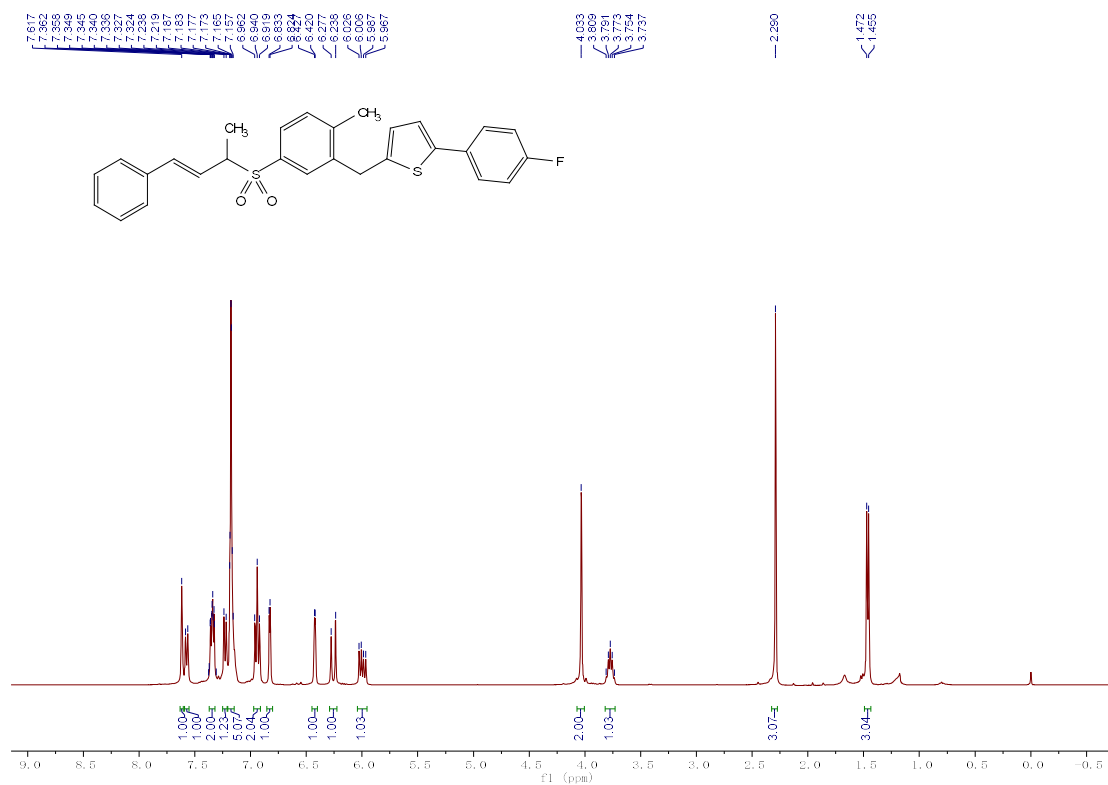

<sup>19</sup>F NMR spectrum (376 MHz, CDCl<sub>3</sub>) of compound 14

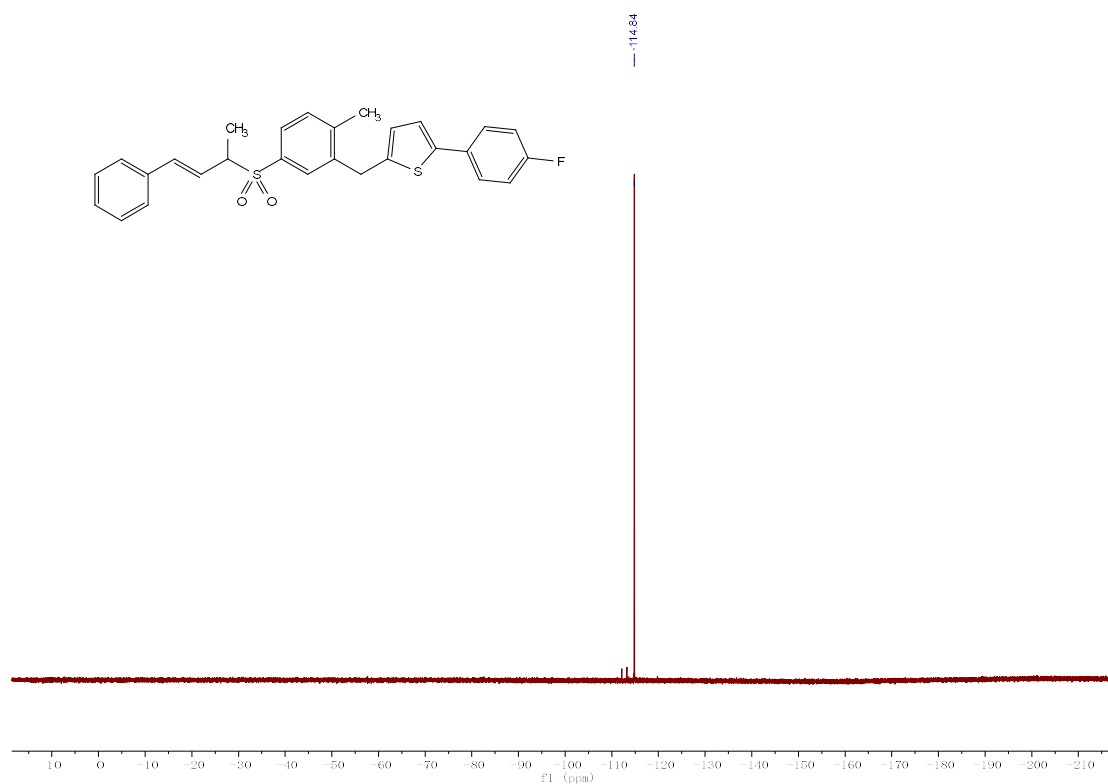

<sup>13</sup>C NMR spectrum (101 MHz, CDCl<sub>3</sub>) of compound 14

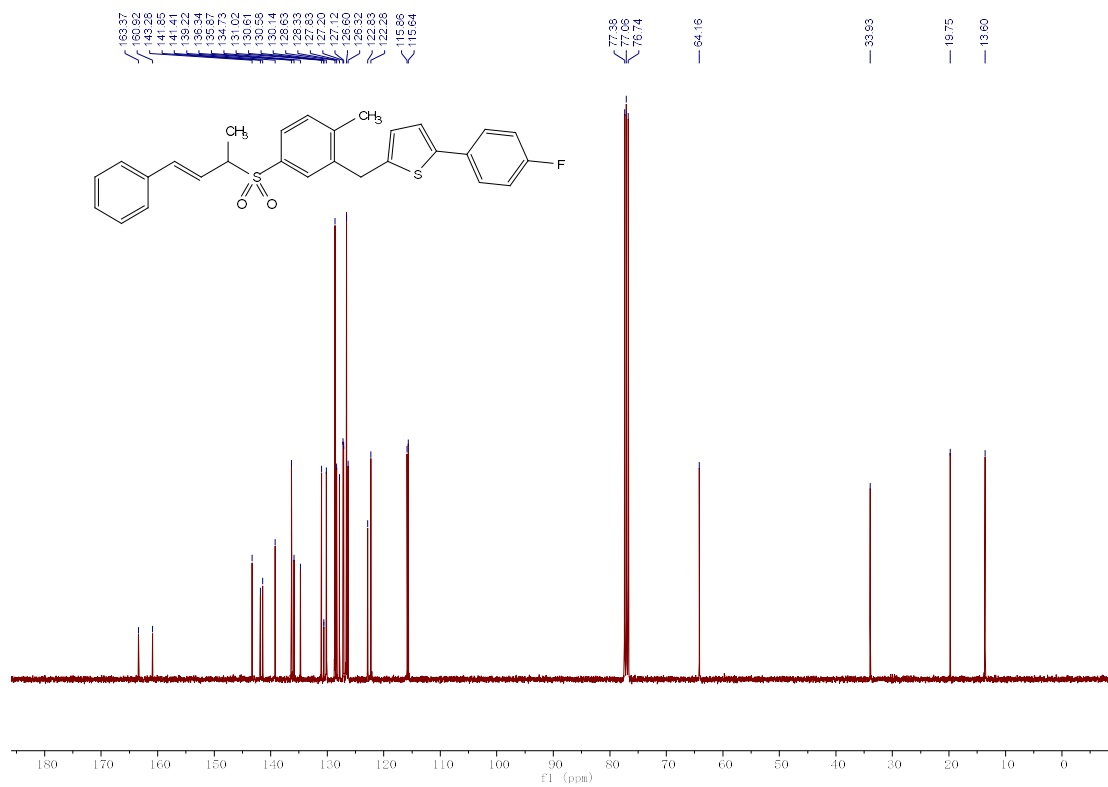

**(E)-1-chloro-4-((4-phenylbut-3-en-2-yl)sulfonyl)benzene (15).**

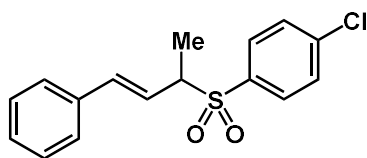

The product (44.2 mg, 72% yield) as yellow oil was purified with silica gel chromatography (petroleum ether/ethyl acetate = 10/1).  $^1\text{H NMR}$  (400 MHz,  $\text{CDCl}_3$ )  $\delta$  7.69 (d,  $J = 8.4$  Hz, 2H), 7.40 (d,  $J = 8.4$  Hz, 2H), 7.24 – 7.18 (m, 5H), 6.26 (d,  $J = 15.6$  Hz, 1H), 5.99 (dd,  $J = 16.0, 8.4$  Hz, 1H), 3.81 – 3.74 (m, 1H), 1.47 (d,  $J = 7.2$  Hz, 3H);  $^{13}\text{C NMR}$  (101 MHz,  $\text{CDCl}_3$ )  $\delta$  140.5, 136.8, 135.6, 135.5, 130.8, 129.2, 128.7, 128.6, 126.6, 121.8, 64.2, 13.5; HRMS Calculated for  $\text{C}_{16}\text{H}_{15}\text{ClO}_2\text{S}$  ( $\text{M}+\text{Na}^+$ ): 329.0373; Found: 329.0374.

$^1\text{H NMR}$  spectrum (400 MHz,  $\text{CDCl}_3$ ) of compound 15

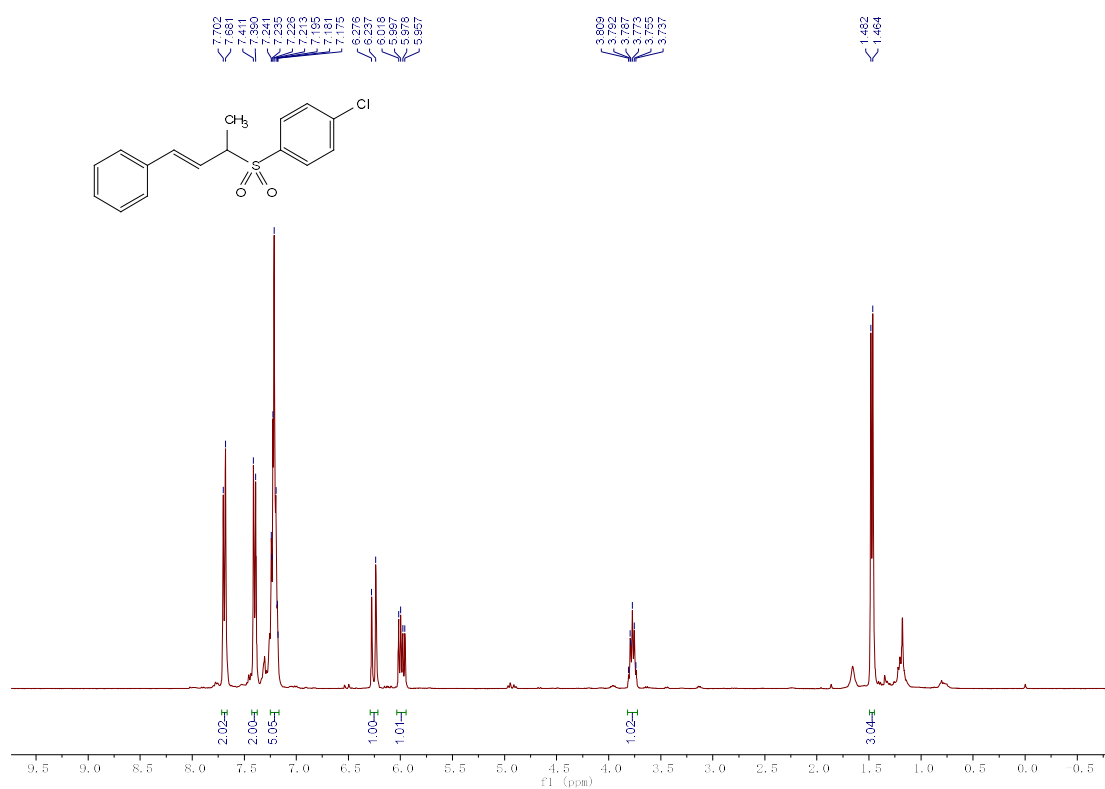

<sup>13</sup>C NMR spectrum (101 MHz, CDCl<sub>3</sub>) of compound **15**

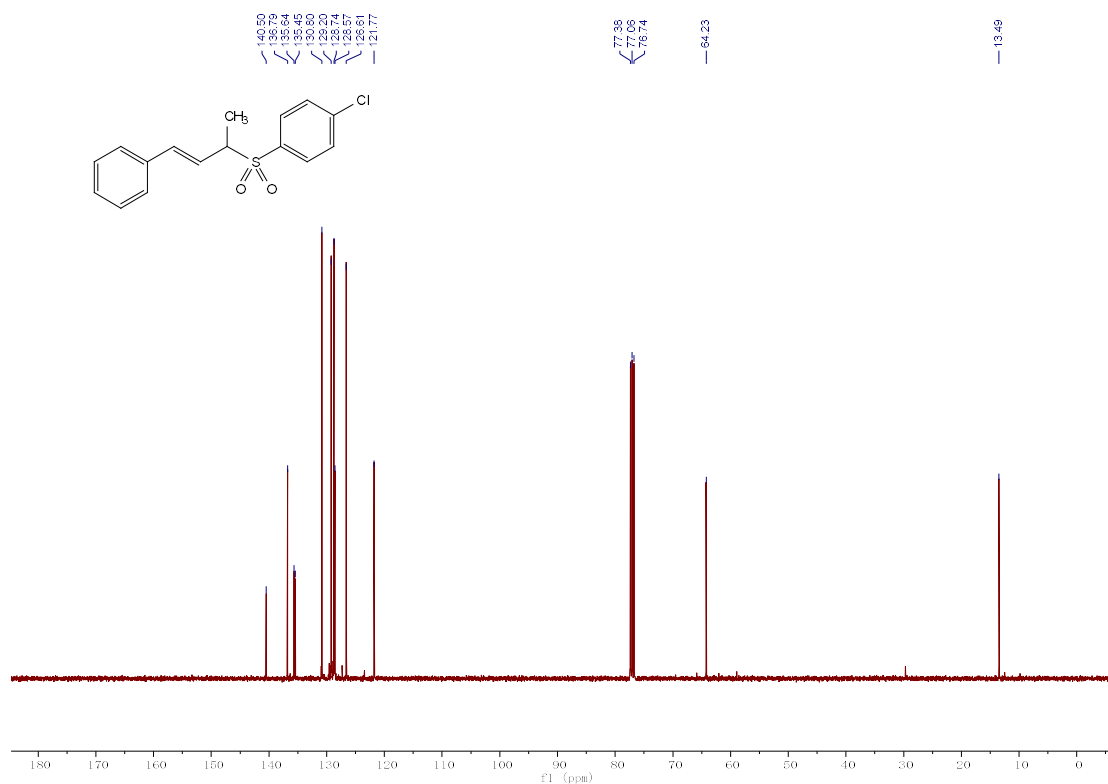

**(E)-1-bromo-4-((4-phenylbut-3-en-2-yl)sulfonyl)benzene (16).**

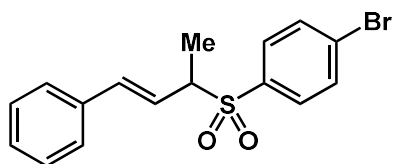

The product (45.7 mg, 65% yield) as light yellow solid was purified with silica gel chromatography (petroleum ether/ethyl acetate = 10/1). <sup>1</sup>H NMR (400 MHz, CDCl<sub>3</sub>) δ 7.63-7.60 (m, 2H), 7.58-7.56 (m, 2H), 7.25-7.18 (m, 5H), 6.26 (d, *J* = 16.0 Hz, 1H), 5.99 (dd, *J* = 16.0 Hz, 8.4 Hz, 1H), 3.81-3.74 (m, 1H), 1.47 (d, *J* = 6.8 Hz, 3H); <sup>13</sup>C NMR (101 MHz, CDCl<sub>3</sub>) δ 136.8, 136.0, 135.6, 132.2, 130.9, 129.1, 128.7, 128.6, 126.6, 121.7, 64.2, 13.5; HRMS Calculated for C<sub>16</sub>H<sub>15</sub>BrO<sub>2</sub>S (M+Na<sup>+</sup>): 372.9868; Found: 372.9870.

<sup>1</sup>H NMR spectrum (400 MHz, CDCl<sub>3</sub>) of compound 16

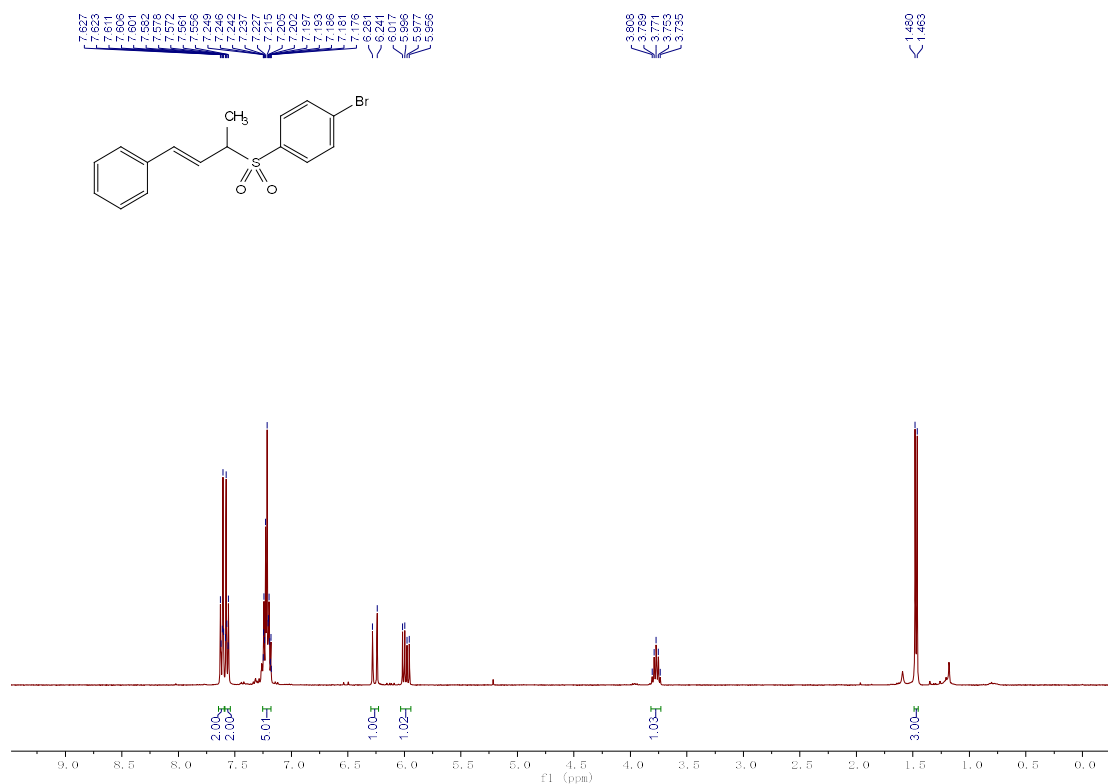

<sup>13</sup>C NMR spectrum (101 MHz, CDCl<sub>3</sub>) of compound 16

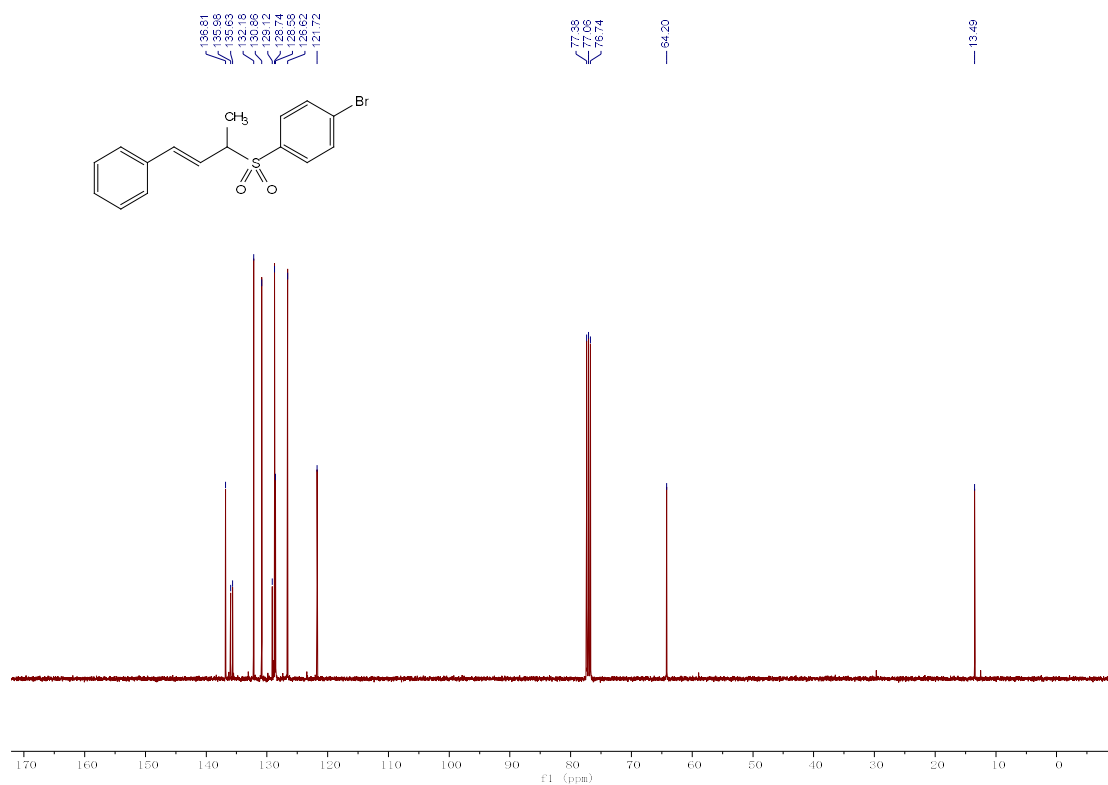

**(E)-4-((4-phenylbut-3-en-2-yl)sulfonyl)phenyl 4-methylbenzenesulfonate (17).**

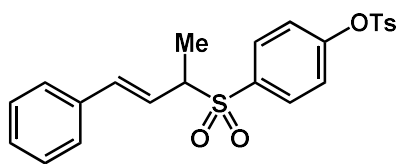

The product (56.6 mg, 64% yield) as light yellow solid was purified with silica gel chromatography (petroleum ether/ethyl acetate = 5/1). **<sup>1</sup>H NMR (400 MHz, CDCl<sub>3</sub>)** δ 7.80 (d, *J* = 8.8 Hz, 2H), 7.65 (d, *J* = 8.0 Hz, 2H), 7.34-7.24 (m, 7H), 7.14 (d, *J* = 8.4 Hz, 2H), 6.29 (d, *J* = 16.0 Hz, 1H), 6.05 (dd, *J* = 16.0 Hz, 8.4 Hz, 1H), 3.90-3.82 (m, 1H), 2.44 (s, 3H), 1.57 (d, *J* = 6.8 Hz, 3H); **<sup>13</sup>C NMR (101 MHz, CDCl<sub>3</sub>)** δ 153.4, 146.1, 136.8, 135.61, 135.58, 131.6, 131.2, 130.0, 128.8, 128.6, 128.4, 126.6, 122.9, 121.8, 64.3, 21.7, 13.3; **HRMS** Calculated for C<sub>23</sub>H<sub>22</sub>O<sub>5</sub>S<sub>2</sub> (M+Na<sup>+</sup>): 465.0801; Found: 465.0802.

**<sup>1</sup>H NMR spectrum (400 MHz, CDCl<sub>3</sub>) of compound 17**

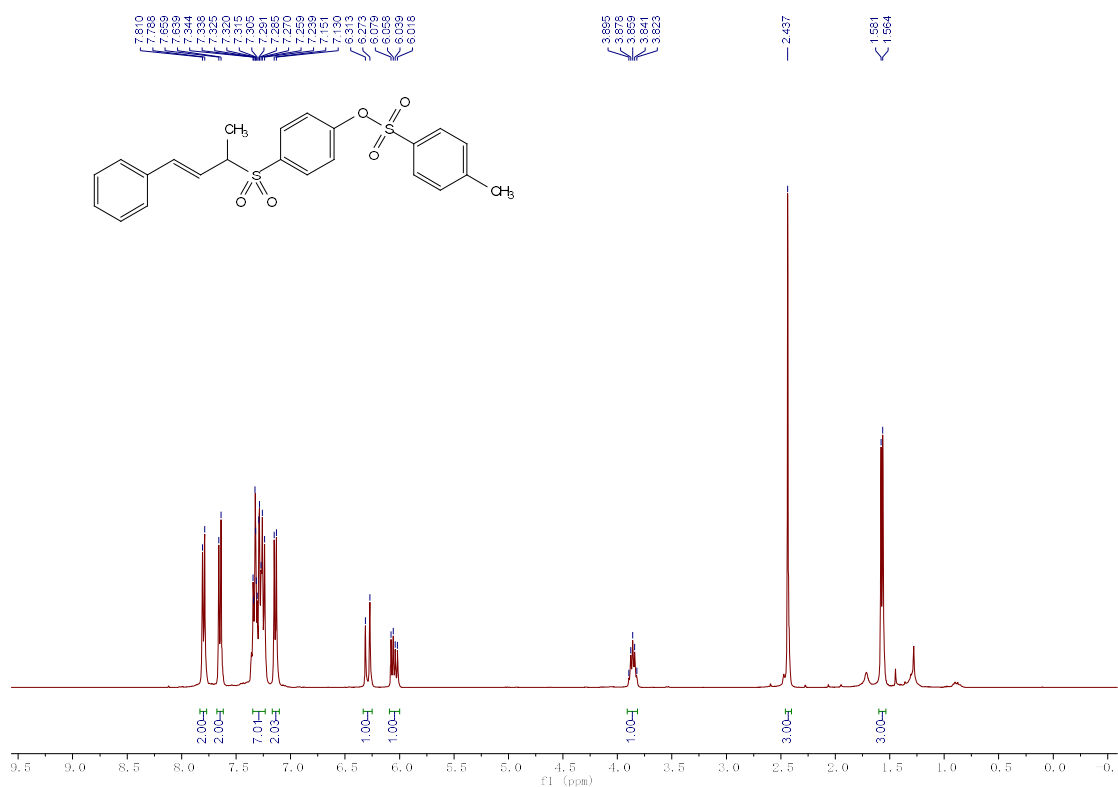





**<sup>1</sup>H NMR spectrum (400 MHz, CDCl<sub>3</sub>) of compound 18**

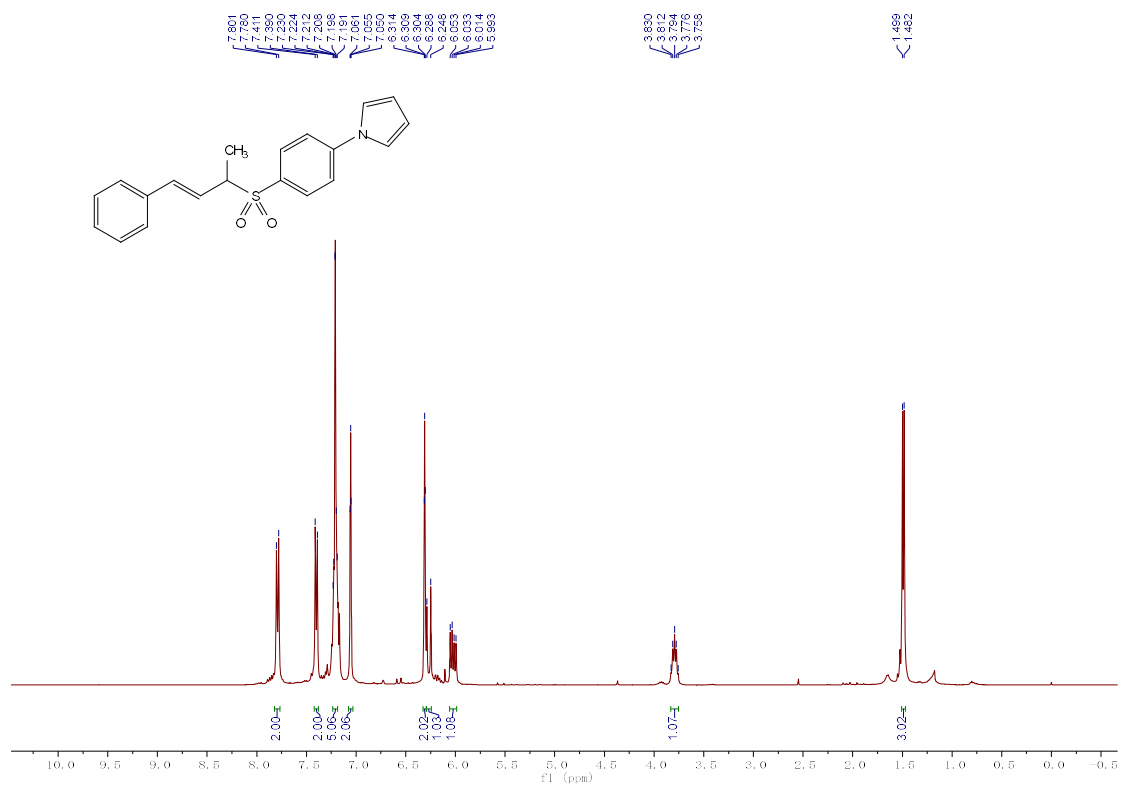

**<sup>13</sup>C NMR spectrum (101 MHz, CDCl<sub>3</sub>) of compound 18**

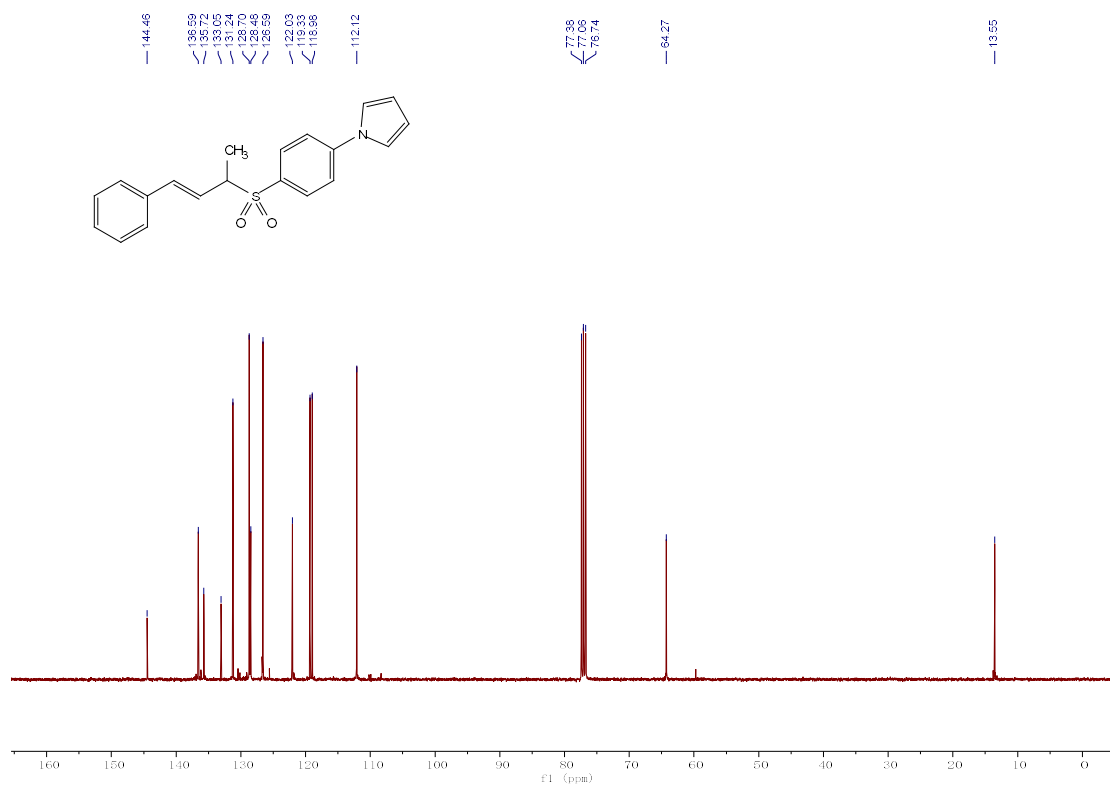

**(E)-2-methoxy-5-((4-phenylbut-3-en-2-yl)sulfonyl)pyridine (19).**

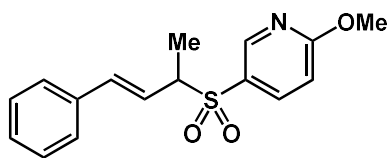

The product (51.0 mg, 84% yield) as white solid was purified with silica gel chromatography (petroleum ether/ethyl acetate = 5/1). **<sup>1</sup>H NMR (400 MHz, Chloroform-*d*)** δ 8.54 (d, *J* = 2.4 Hz, 1H), 7.82 (dd, *J* = 8.8 Hz, 2.4 Hz, 1H), 7.25-7.19 (m, 5H), 6.71 (d, *J* = 8.8 Hz, 1H), 6.30 (d, *J* = 15.6 Hz, 1H), 6.02 (dd, *J* = 16.0 Hz, 8.4 Hz, 1H), 3.92 (s, 3H), 3.81-3.74 (m, 1H), 1.49 (d, *J* = 7.2 Hz, 3H); **<sup>13</sup>C NMR (101 MHz, CDCl<sub>3</sub>)** δ 167.1, 149.7, 139.3, 136.8, 135.7, 128.7, 128.6, 126.6, 126.1, 121.9, 111.1, 64.6, 54.4, 13.6; **HRMS** Calculated for C<sub>16</sub>H<sub>17</sub>NO<sub>3</sub>S (M+H<sup>+</sup>): 304.1002; Found: 304.1000.

**<sup>1</sup>H NMR spectrum (400 MHz, CDCl<sub>3</sub>) of compound 19**

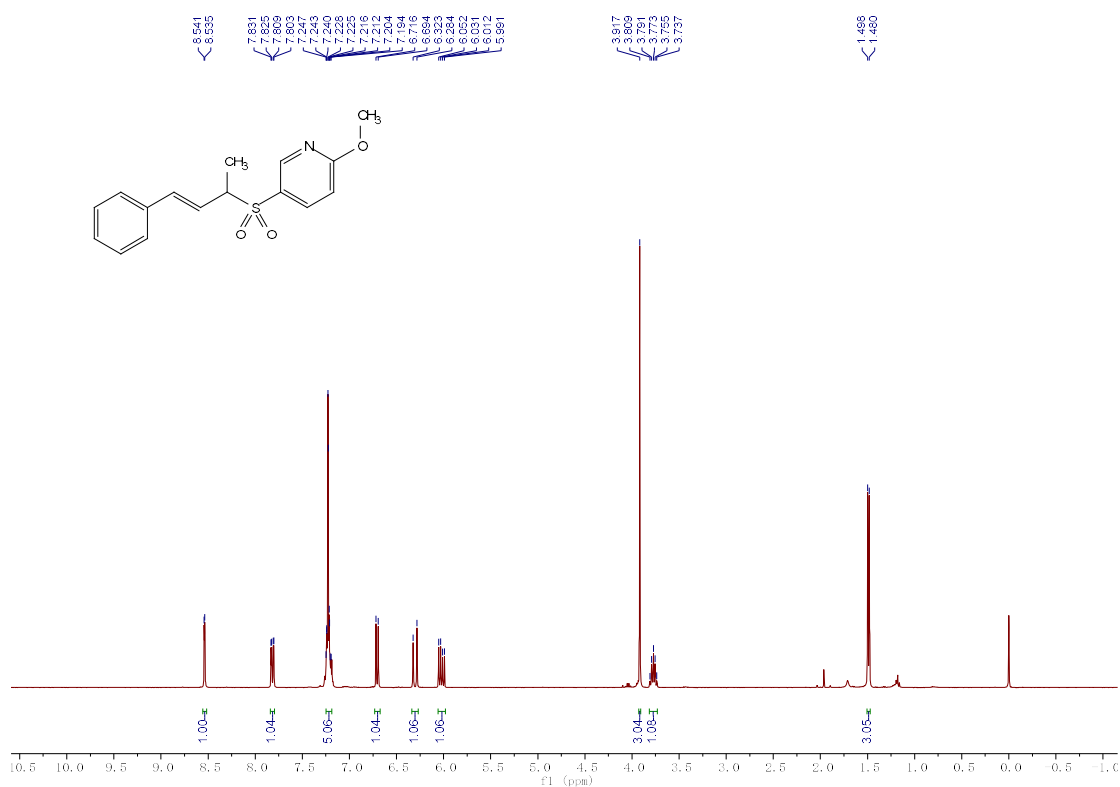

<sup>13</sup>C NMR spectrum (101 MHz, CDCl<sub>3</sub>) of compound **19**

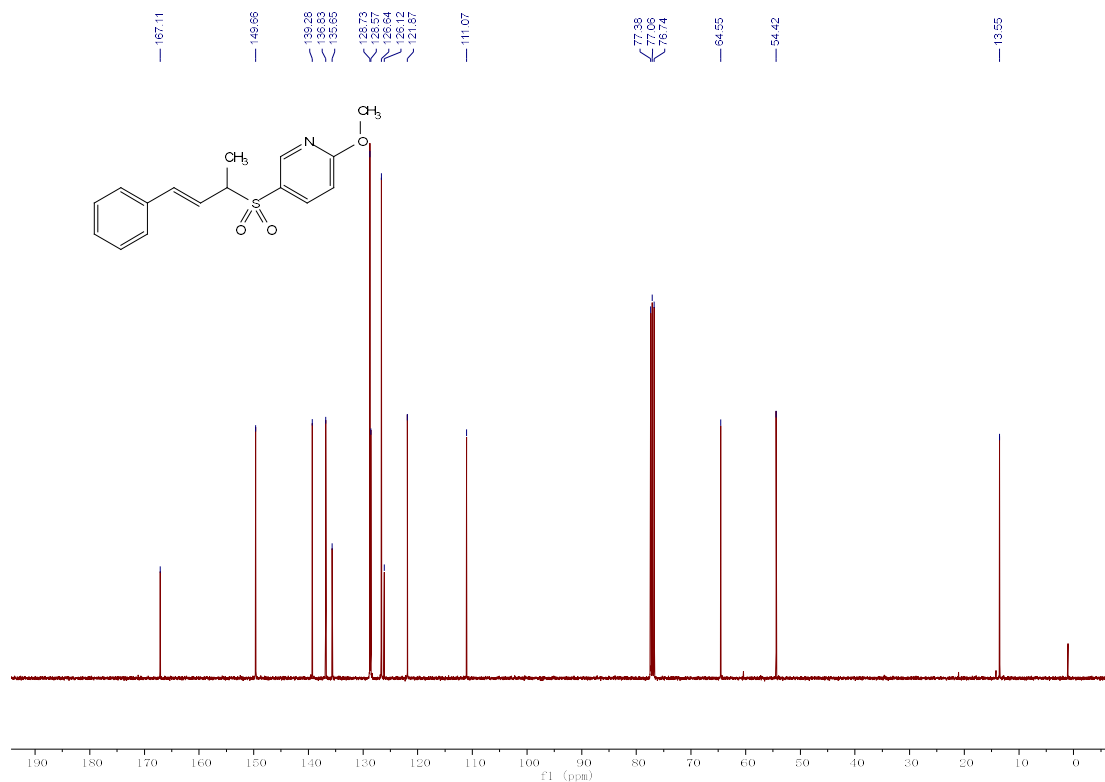

**(E)-4-(5-((4-phenylbut-3-en-2-yl)sulfonyl)pyridin-2-yl)morpholine (20).**

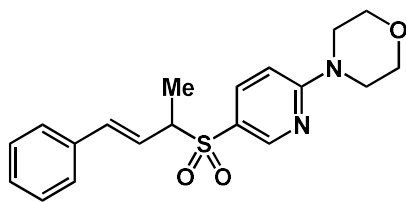

The product (66.0 mg, 92% yield) as yellow solid was purified with silica gel chromatography (petroleum ether/ethyl acetate = 3/1). <sup>1</sup>H NMR (400 MHz, CDCl<sub>3</sub>) δ 8.45 (s, 1H), 7.67 (d, *J* = 8.0 Hz, 1H), 7.24-7.18 (m, 5H), 6.47 (d, *J* = 8.4 Hz, 1H), 6.34 (d, *J* = 15.6 Hz, 1H), 6.04 (dd, *J* = 15.6 Hz, 7.6 Hz, 1H), 3.76-3.70 (m, 5H), 3.57 (s, 4H), 1.46 (d, *J* = 6.4 Hz, 3H); <sup>13</sup>C NMR (101 MHz, CDCl<sub>3</sub>) δ 160.5, 150.2, 138.3, 136.4, 135.9, 128.7, 128.4, 126.6, 122.3, 120.7, 104.9, 66.4, 64.5, 44.8, 13.7; HRMS Calculated for C<sub>19</sub>H<sub>22</sub>N<sub>2</sub>O<sub>3</sub>S (M+ H<sup>+</sup>): 359.1424; Found: 359.1425.

**<sup>1</sup>H NMR spectrum (400 MHz, CDCl<sub>3</sub>) of compound 20**

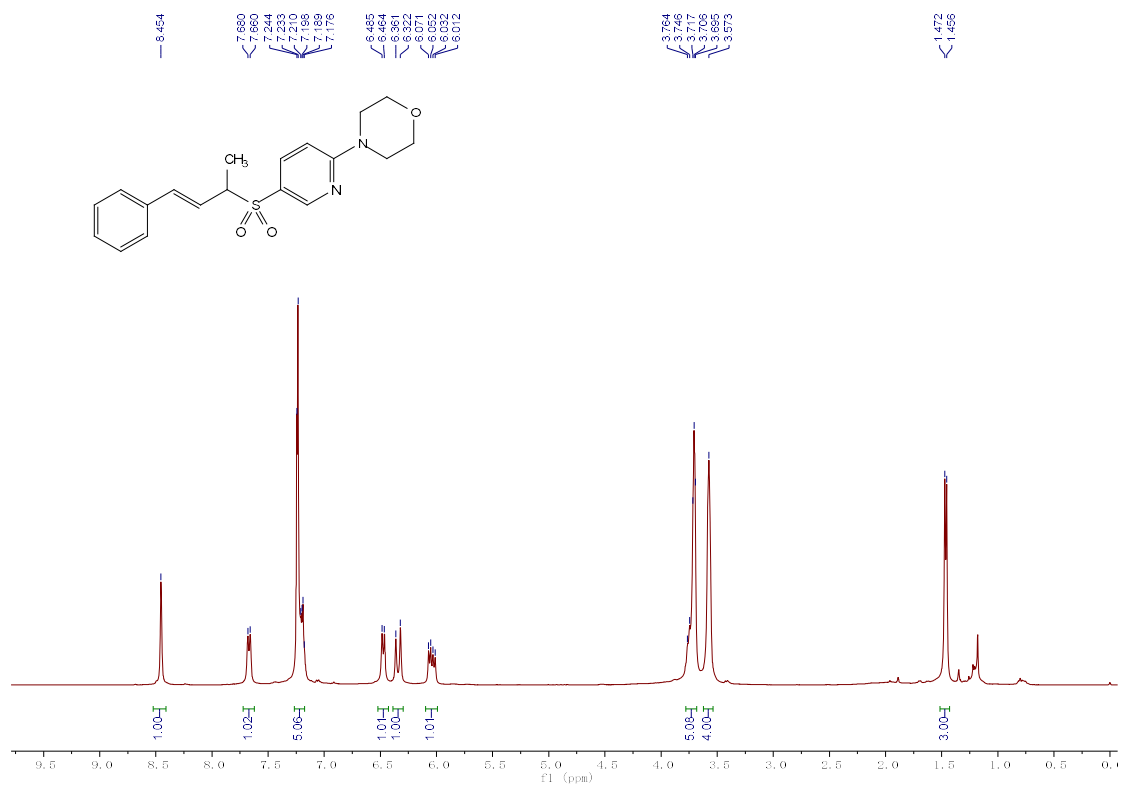

**<sup>13</sup>C NMR spectrum (101 MHz, CDCl<sub>3</sub>) of compound 20**

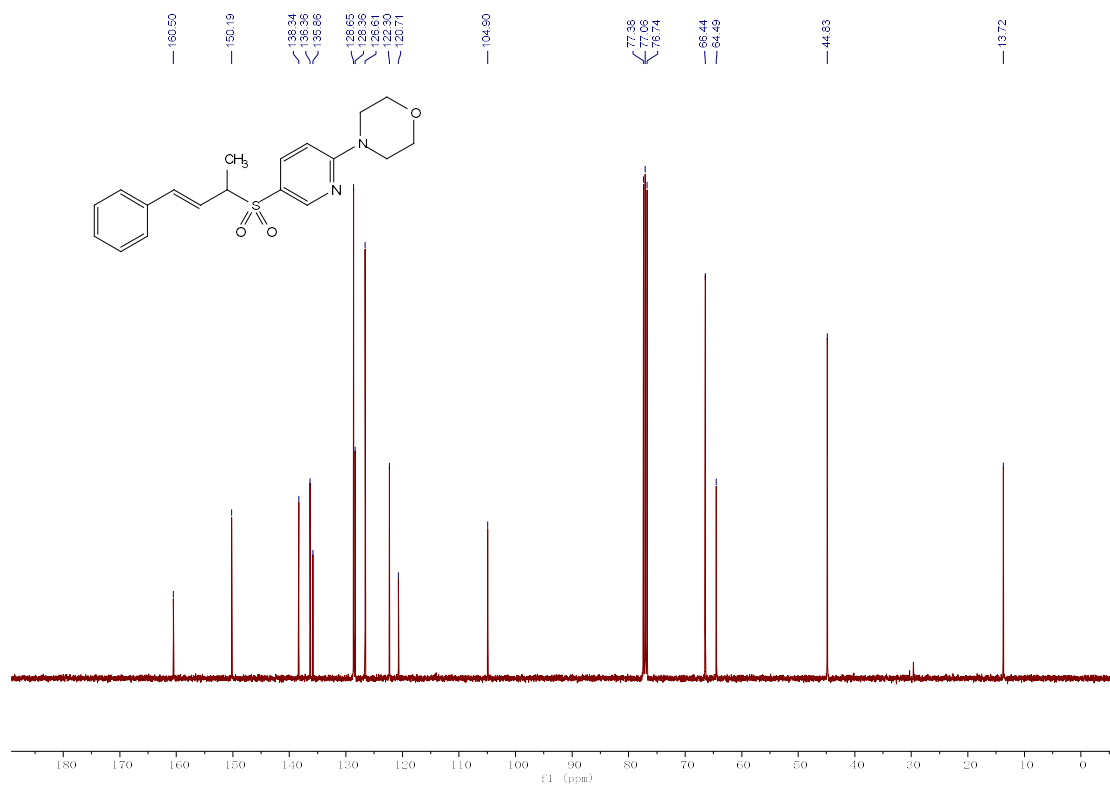

**(E)-3-((4-phenylbut-3-en-2-yl)sulfonyl)thiophene (21).**

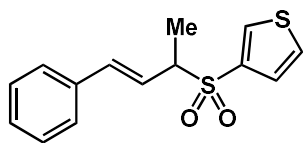

The product (34.0 mg, 61% yield) as yellow oil was purified with silica gel chromatography (petroleum ether/ethyl acetate = 5/1).  $^1\text{H NMR}$  (400 MHz,  $\text{CDCl}_3$ )  $\delta$  8.03-8.02 (m, 1H), 7.44-7.41 (m, 1H), 7.37-7.29 (m, 6H), 6.40 (d,  $J = 16.0$  Hz, 1H), 6.14 (dd,  $J = 16.0$  Hz, 8.4 Hz, 1H), 3.93-3.86 (m, 1H), 1.60 (d,  $J = 6.8$  Hz, 3H);  $^{13}\text{C NMR}$  (101 MHz,  $\text{CDCl}_3$ )  $\delta$  137.4, 136.6, 135.8, 133.7, 128.7, 128.5, 127.6, 127.1, 126.6, 122.0, 64.3, 13.4; HRMS Calculated for  $\text{C}_{14}\text{H}_{14}\text{O}_2\text{S}_2$  ( $\text{M}+\text{Na}^+$ ): 301.0327; Found: 301.0334.

$^1\text{H NMR}$  spectrum (400 MHz,  $\text{CDCl}_3$ ) of compound **21**

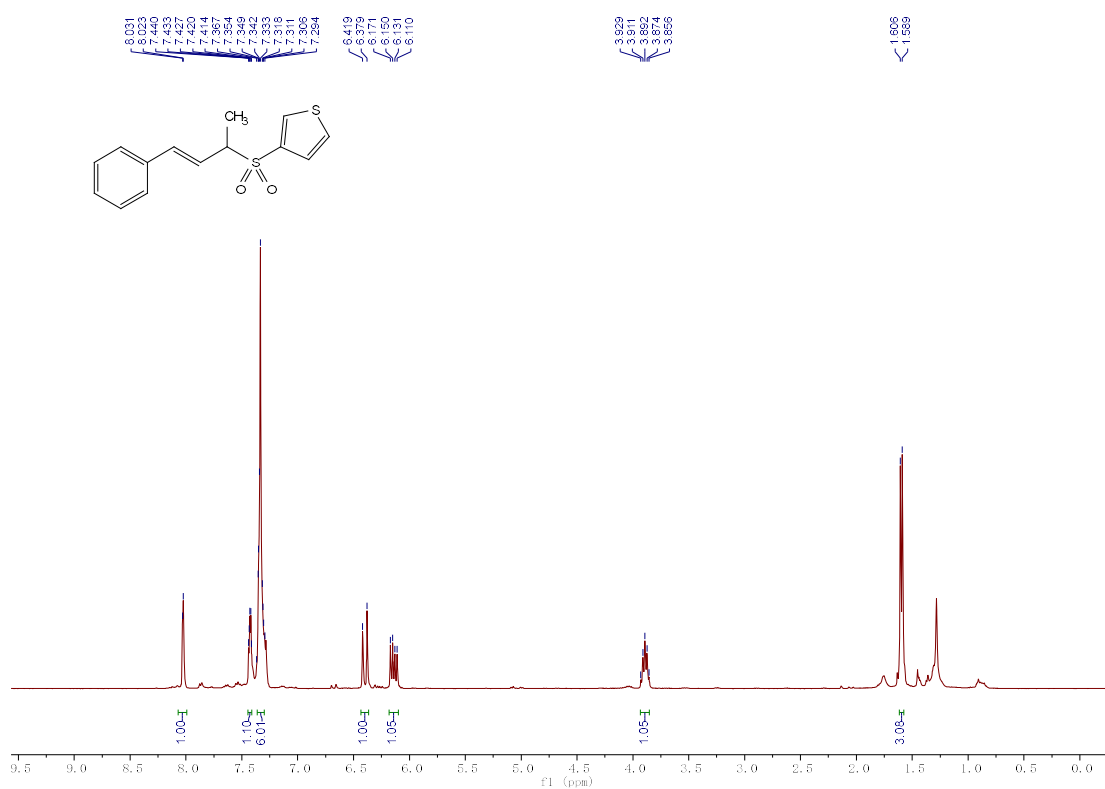

<sup>13</sup>C NMR spectrum (101 MHz, CDCl<sub>3</sub>) of compound **21**

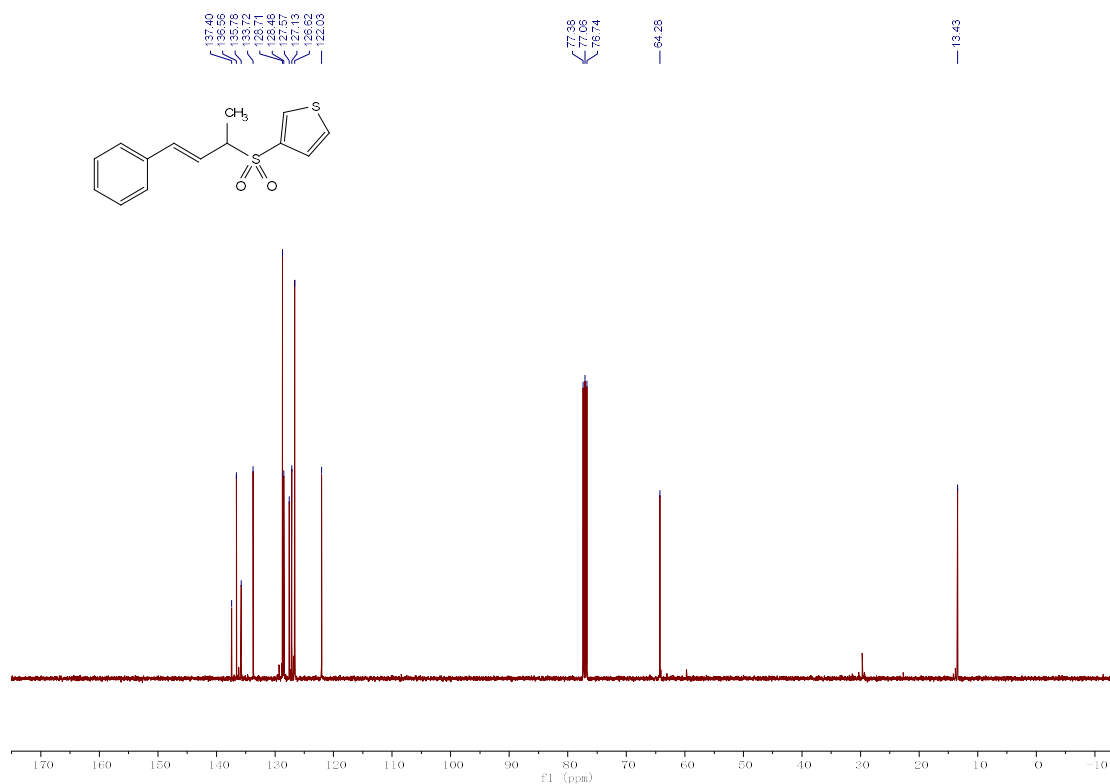

**(E)-5-((4-phenylbut-3-en-2-yl)sulfonyl)-1H-indole (22).**

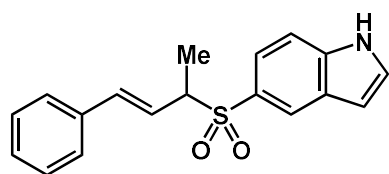

The product (52.9 mg, 85% yield) as white solid was purified with silica gel chromatography (petroleum ether/ethyl acetate = 2/1). <sup>1</sup>H NMR (400 MHz, CDCl<sub>3</sub>) δ 9.01 (s, 1H), 7.49 (dd, *J* = 8.8 Hz, 1.6 Hz, 1H), 7.35 (d, *J* = 8.4 Hz, 1H), 7.22-7.14 (m, 6H), 6.51 (s, 1H), 6.29 (d, *J* = 16.0 Hz, 1H), 6.01 (dd, *J* = 15.6 Hz, 8.0 Hz, 1H), 3.86-3.79 (m, 1H), 1.44 (d, *J* = 6.8 Hz, 3H); <sup>13</sup>C NMR (101 MHz, CDCl<sub>3</sub>) δ 138.4, 136.2, 136.0, 128.6, 128.2, 127.4, 126.9, 126.6, 123.4, 122.5, 122.0, 111.5, 103.8, 64.4, 14.1; HRMS Calculated for C<sub>18</sub>H<sub>17</sub>NO<sub>2</sub>S (M+Na<sup>+</sup>): 334.0872; Found: 334.0872.

**<sup>1</sup>H NMR spectrum (400 MHz, CDCl<sub>3</sub>) of compound 21**

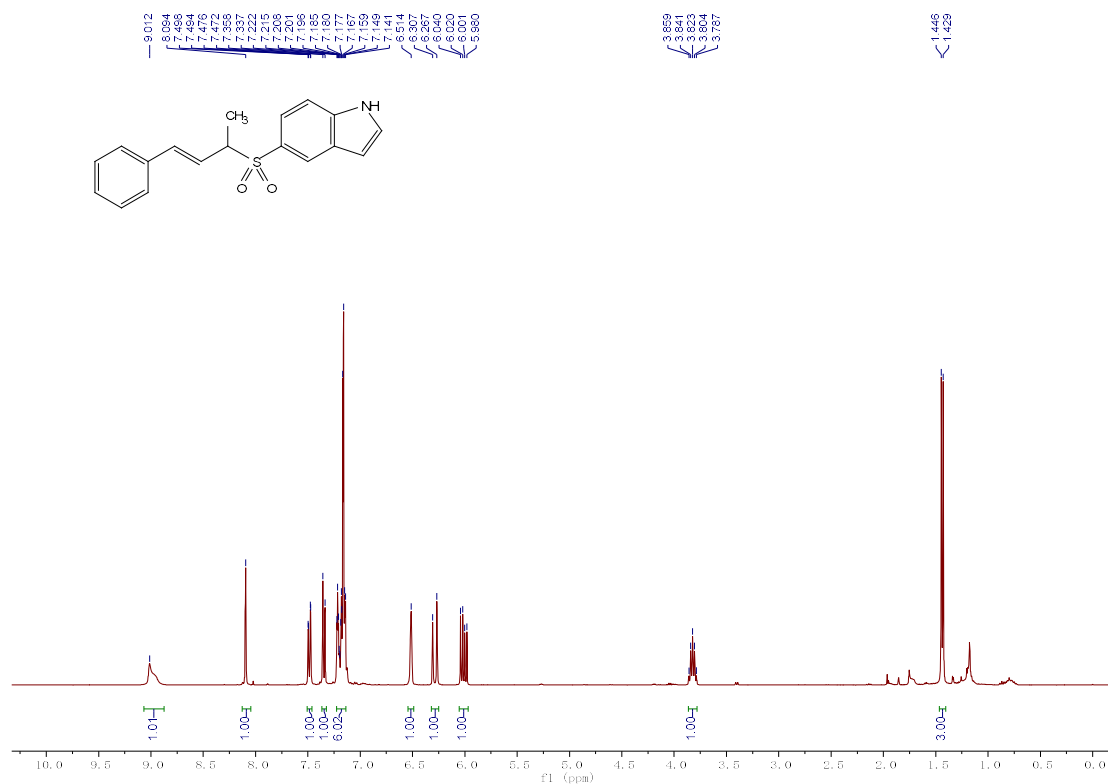

**<sup>13</sup>C NMR spectrum (101 MHz, CDCl<sub>3</sub>) of compound 21**

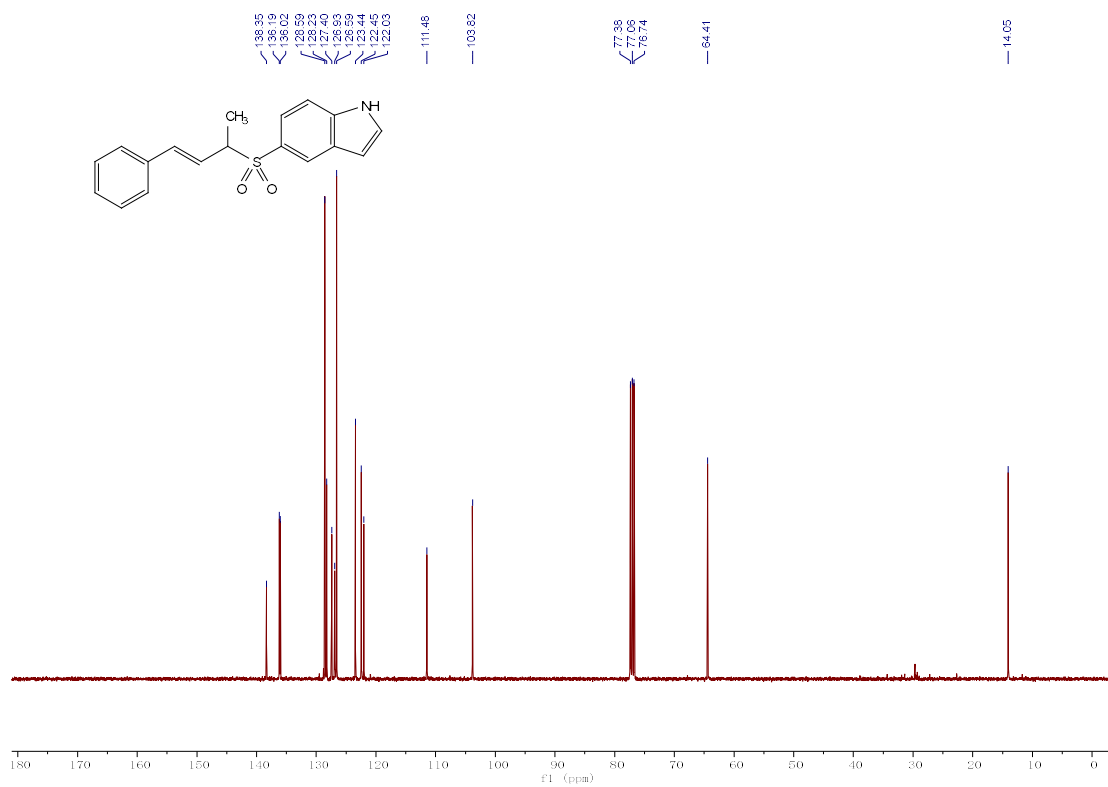

**(E)-4-((4-phenylbut-3-en-2-yl)sulfonyl)phenol (23).**

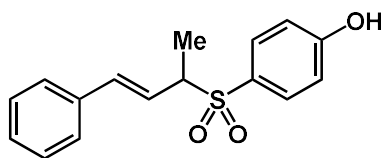

The product (51.9 mg, 90% yield) as white solid was purified with silica gel chromatography (petroleum ether/ethyl acetate = 2/1).  $^1\text{H NMR}$  (400 MHz,  $\text{CDCl}_3$ )  $\delta$  7.56 (d,  $J = 8.4$  Hz, 2H), 7.23-7.18 (m, 5H), 6.84 (d,  $J = 8.4$  Hz, 2H), 6.29 (d,  $J = 16.0$  Hz, 1H), 5.96 (dd,  $J = 16.0$  Hz, 8.4 Hz, 1H), 3.80-3.72 (m, 1H), 1.44 (d,  $J = 6.8$  Hz, 3H);  $^{13}\text{C NMR}$  (101 MHz,  $\text{CDCl}_3$ )  $\delta$  161.3, 136.8, 135.8, 131.6, 128.7, 128.5, 127.3, 126.6, 121.8, 115.9, 64.4, 13.7; HRMS Calculated for  $\text{C}_{16}\text{H}_{16}\text{O}_3\text{S}$  ( $\text{M}+\text{Na}^+$ ): 311.0712; Found: 311.0711.

$^1\text{H NMR}$  spectrum (400 MHz,  $\text{CDCl}_3$ ) of compound **23**

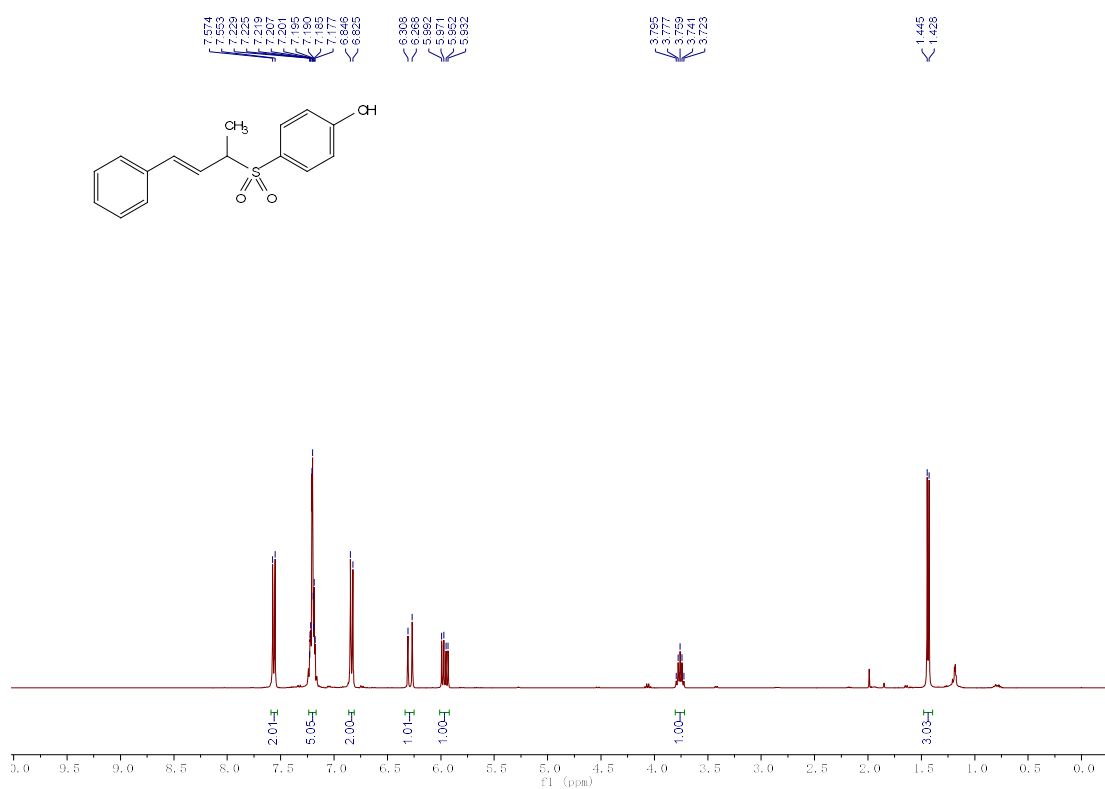



<sup>13</sup>C NMR spectrum (101 MHz, CDCl<sub>3</sub>) of compound **23**

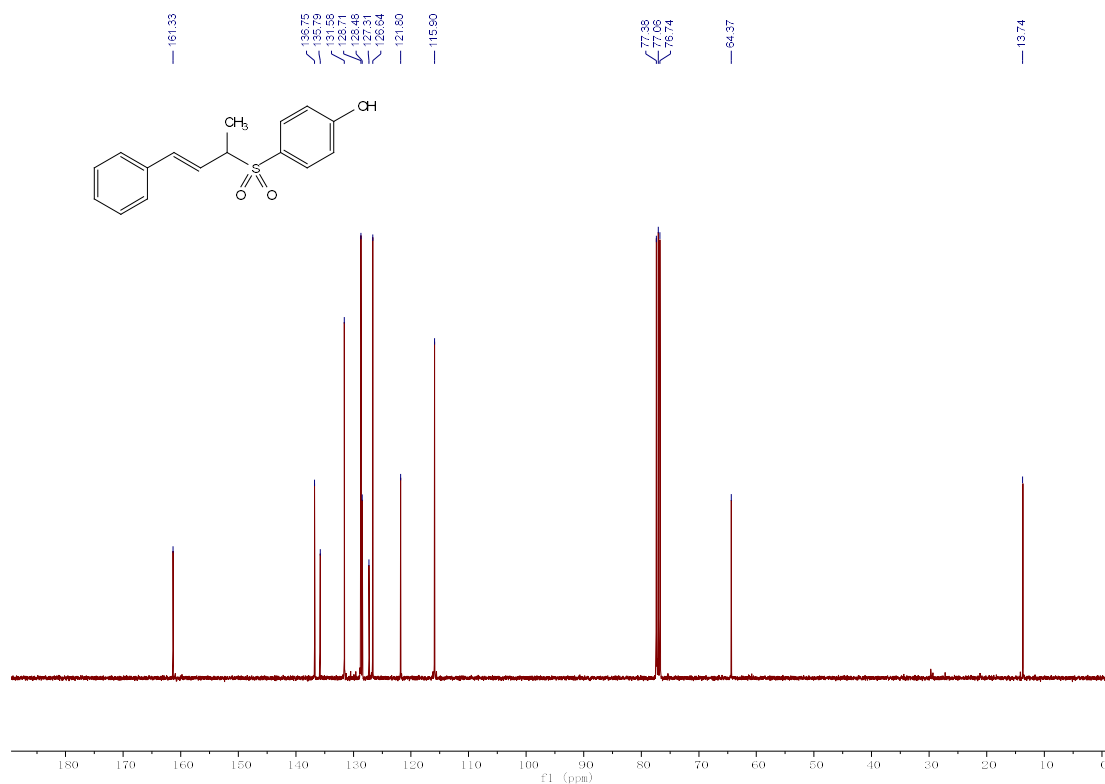

**(E)-4-((4-phenylbut-3-en-2-yl)sulfonyl)phenylmethanol (24).**

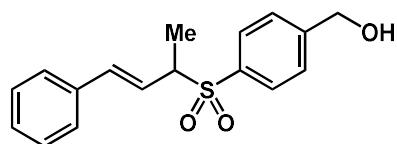

The product (44.2 mg, 73% yield) as white solid was purified with silica gel chromatography (petroleum ether/ethyl acetate = 2/1). <sup>1</sup>H NMR (400 MHz, CDCl<sub>3</sub>) δ 7.68 (d, *J* = 8.4 Hz, 2H), 7.39 (d, *J* = 8.4 Hz, 2H), 7.25-7.17 (m, 5H), 6.26 (d, *J* = 15.6 Hz, 1H), 5.98 (dd, *J* = 16.0 Hz, 8.4 Hz, 1H), 4.69 (s, 2H), 3.80-3.73 (m, 1H), 2.09 (s, 1H), 1.45 (d, *J* = 6.8 Hz, 3H); <sup>13</sup>C NMR (101 MHz, CDCl<sub>3</sub>) δ 147.4, 136.6, 135.8, 135.6, 129.4, 128.7, 128.5, 126.7, 126.6, 121.9, 64.1, 64.1, 13.6; HRMS Calculated for C<sub>17</sub>H<sub>18</sub>O<sub>3</sub>S (M+Na<sup>+</sup>): 325.0869; Found: 325.0868.

<sup>1</sup>H NMR spectrum (400 MHz, CDCl<sub>3</sub>) of compound 24

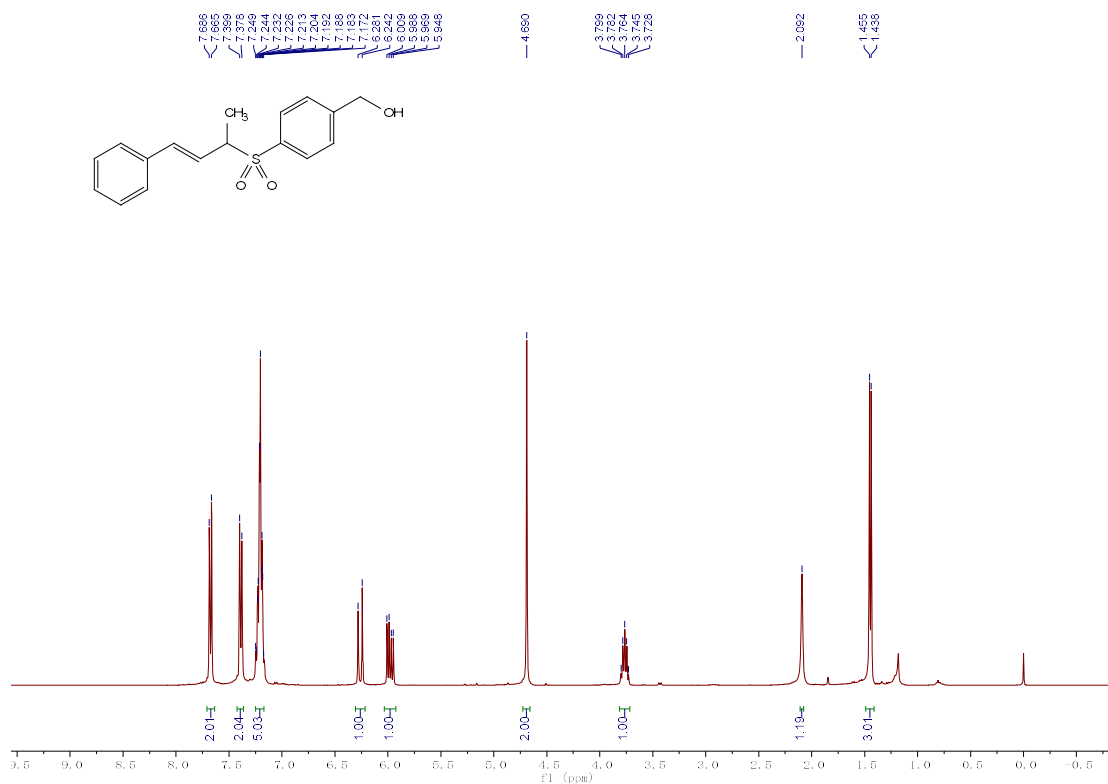

<sup>13</sup>C NMR spectrum (101 MHz, CDCl<sub>3</sub>) of compound 24

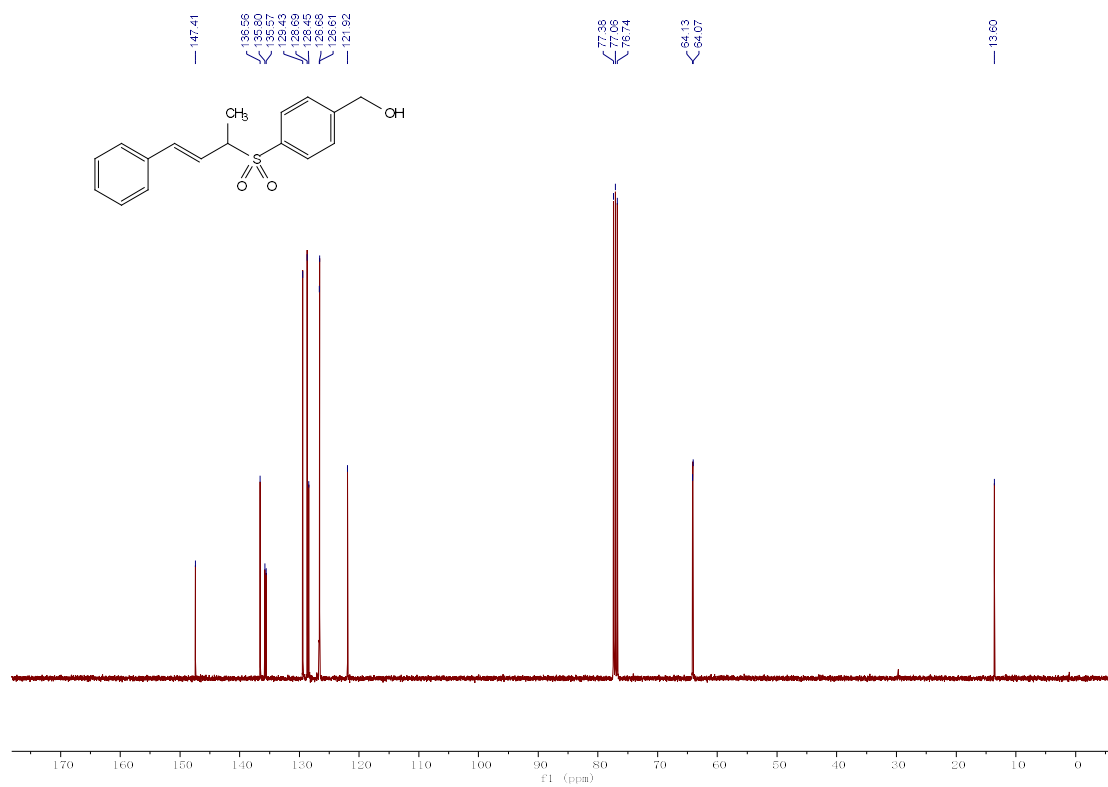

**(E)-4-((4-phenylbut-3-en-2-yl)sulfonyl)aniline (25).**

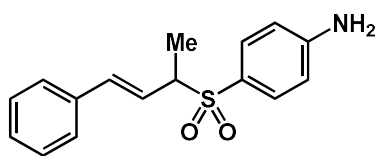

The product (35.1 mg, 61% yield) as white solid was purified with silica gel chromatography (petroleum ether/ethyl acetate = 2/1). **<sup>1</sup>H NMR (400 MHz, CDCl<sub>3</sub>)** δ 7.49 (d, *J* = 8.8 Hz, 2H), 7.24-7.18 (m, 5H), 6.56 (d, *J* = 8.8 Hz, 2H), 6.29 (d, *J* = 16.0 Hz, 1H), 6.01 (dd, *J* = 16.0 Hz, 8.0 Hz, 1H), 4.14 (s, 2H), 3.76-3.68 (m, 1H), 1.43 (d, *J* = 6.8 Hz, 3H); **<sup>13</sup>C NMR (101 MHz, CDCl<sub>3</sub>)** δ 151.5, 136.1, 136.0, 131.4, 128.6, 128.2, 126.6, 124.7, 122.8, 113.8, 64.2, 13.8; **HRMS** Calculated for C<sub>16</sub>H<sub>17</sub>NO<sub>2</sub>S (M+Na<sup>+</sup>): 310.0872; Found: 310.0869.

**<sup>1</sup>H NMR spectrum (400 MHz, CDCl<sub>3</sub>) of compound 25**

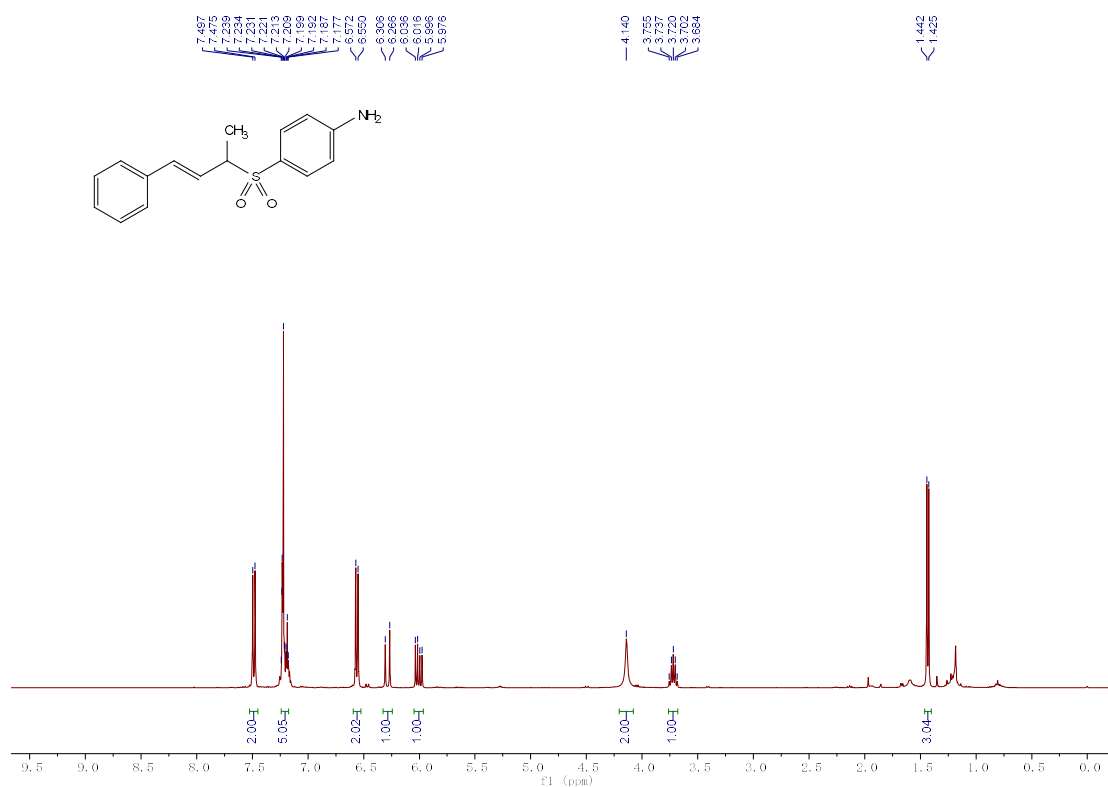

<sup>13</sup>C NMR spectrum (101 MHz, CDCl<sub>3</sub>) of compound **25**

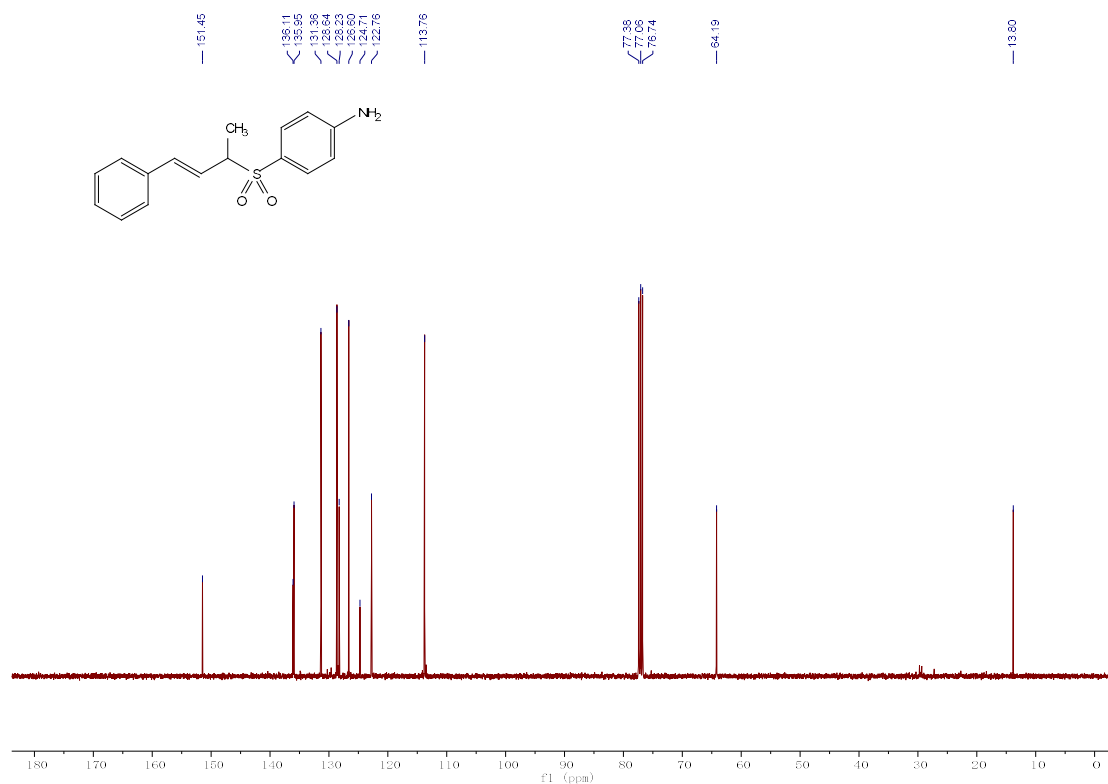

**(E)-4-((4-phenylbut-3-en-2-yl)sulfonyl)benzamide (26).**

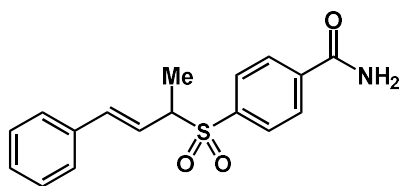

The product (40.4 mg, 64% yield) as white solid was purified with silica gel chromatography (petroleum ether/ethyl acetate = 1/4). <sup>1</sup>H NMR (400 MHz, DMSO-*d*<sub>6</sub>) δ 8.21 (s, 1H), 8.07 (d, *J* = 8.4 Hz, 2H), 7.91 (d, *J* = 8.4 Hz, 2H), 7.66 (s, 1H), 7.38-7.26 (m, 5H), 6.47 (d, *J* = 15.6 Hz, 1H), 6.10 (dd, *J* = 16.0 Hz, 8.4 Hz, 1H), 4.35-4.28 (m, 1H), 1.40 (d, *J* = 6.8 Hz, 3H); <sup>13</sup>C NMR (101 MHz, DMSO-*d*<sub>6</sub>) δ 166.6, 139.3, 139.0, 136.2, 135.7, 128.81, 128.75, 128.4, 128.2, 126.5, 122.0, 62.4, 13.2; HRMS Calculated for C<sub>17</sub>H<sub>17</sub>NO<sub>3</sub>S (M+H<sup>+</sup>): 316.1002; Found: 316.1003.

<sup>1</sup>H NMR spectrum (400 MHz, DMSO-*d*<sub>6</sub>) of compound 26

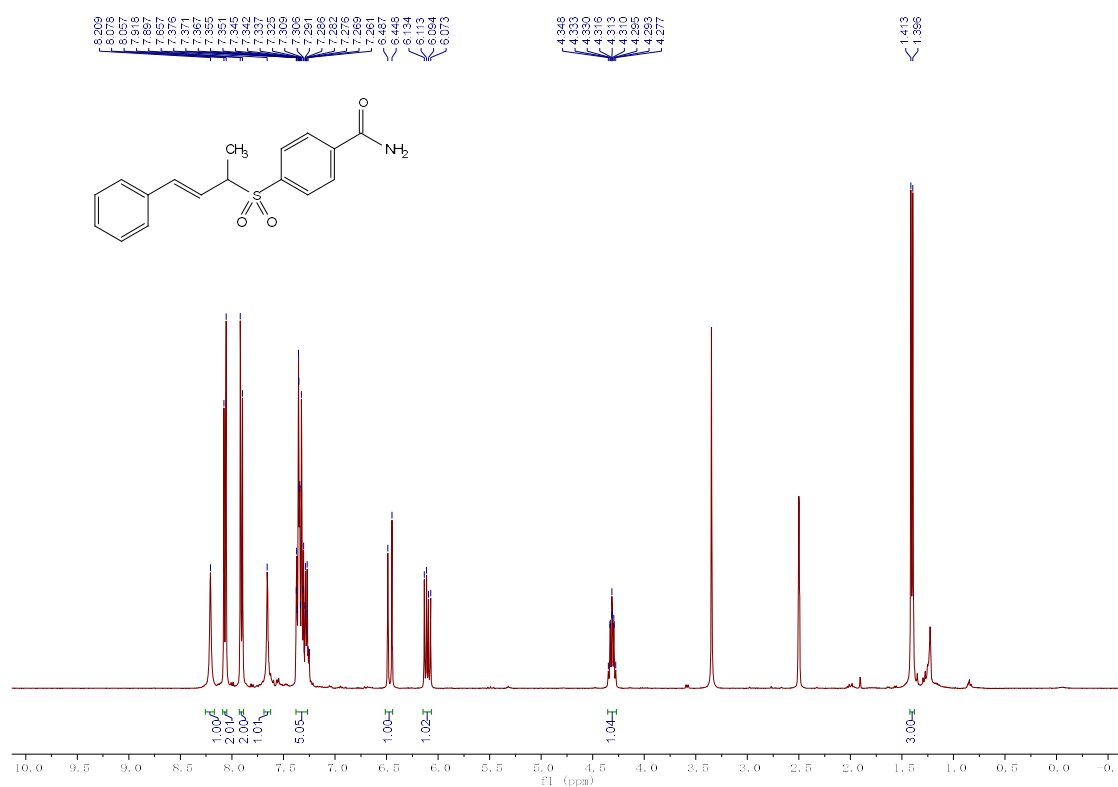

<sup>13</sup>C NMR spectrum (101 MHz, DMSO-*d*<sub>6</sub>) of compound 26

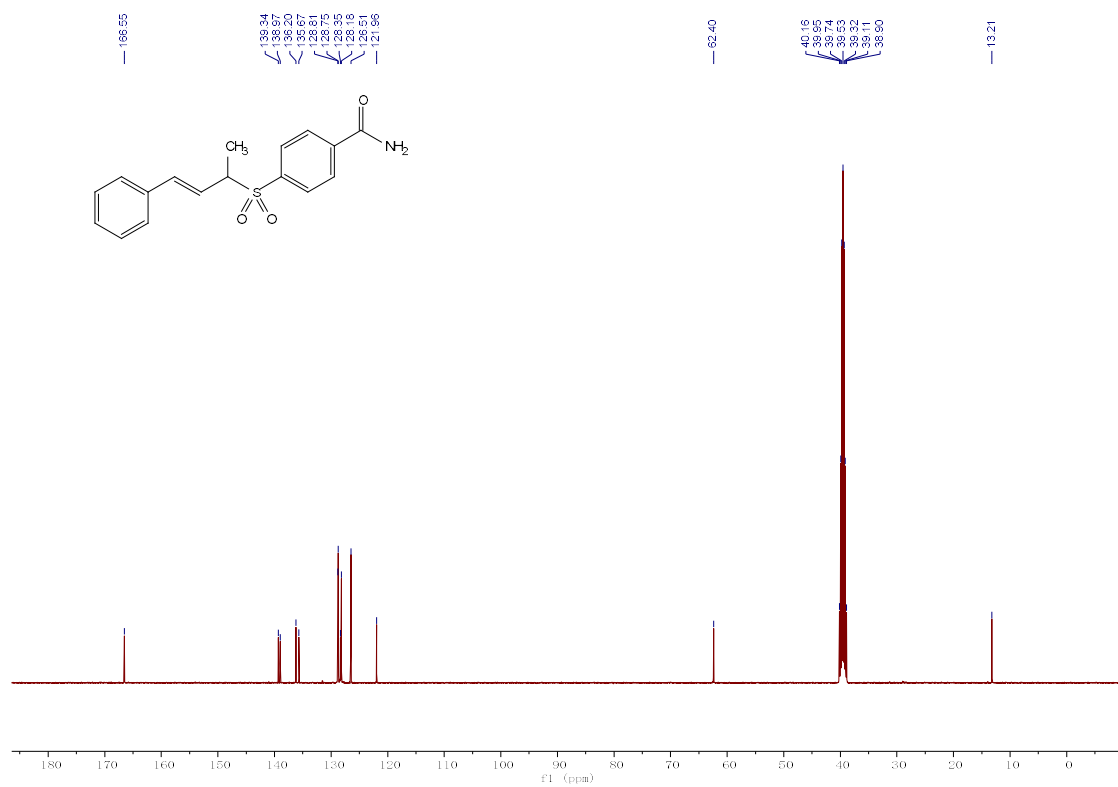

**(E)-4-(4-((4-phenylbut-3-en-2-yl)sulfonyl)phenyl)pent-4-enoic acid (27).**

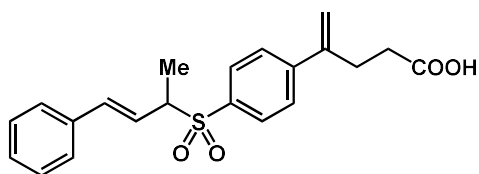

The product (51.9 mg, 70% yield) as yellow solid was purified with silica gel chromatography (petroleum ether/ethyl acetate = 1/1).  $^1\text{H NMR}$  (400 MHz,  $\text{DMSO-}d_6$ )  $\delta$  12.15 (s, 1H), 7.79 (d,  $J = 8.0$  Hz, 2H), 7.69 (d,  $J = 8.4$  Hz, 2H), 7.37 – 7.27 (m, 5H), 6.45 (d,  $J = 16.0$  Hz, 1H), 6.10 (dd,  $J = 16.0, 8.4$  Hz, 1H), 5.51 (s, 1H), 5.25 (s, 1H), 4.28 – 4.21 (m, 1H), 2.74 (t,  $J = 7.6$  Hz, 2H), 2.36 (t,  $J = 7.6$  Hz, 2H), 1.40 (d,  $J = 7.2$  Hz, 3H);  $^{13}\text{C NMR}$  (101 MHz,  $\text{DMSO-}d_6$ )  $\delta$  173.7, 145.4, 145.2, 136.1, 135.9, 135.8, 129.0, 128.7, 128.3, 126.47, 126.46, 122.2, 115.5, 62.5, 32.4, 29.3, 13.3; HRMS Calculated for  $\text{C}_{21}\text{H}_{22}\text{O}_4\text{S}$  ( $\text{M}+\text{Na}^+$ ): 393.1131; Found: 393.1130.

**$^1\text{H NMR}$  spectrum (400 MHz,  $\text{DMSO-}d_6$ ) of compound 27**

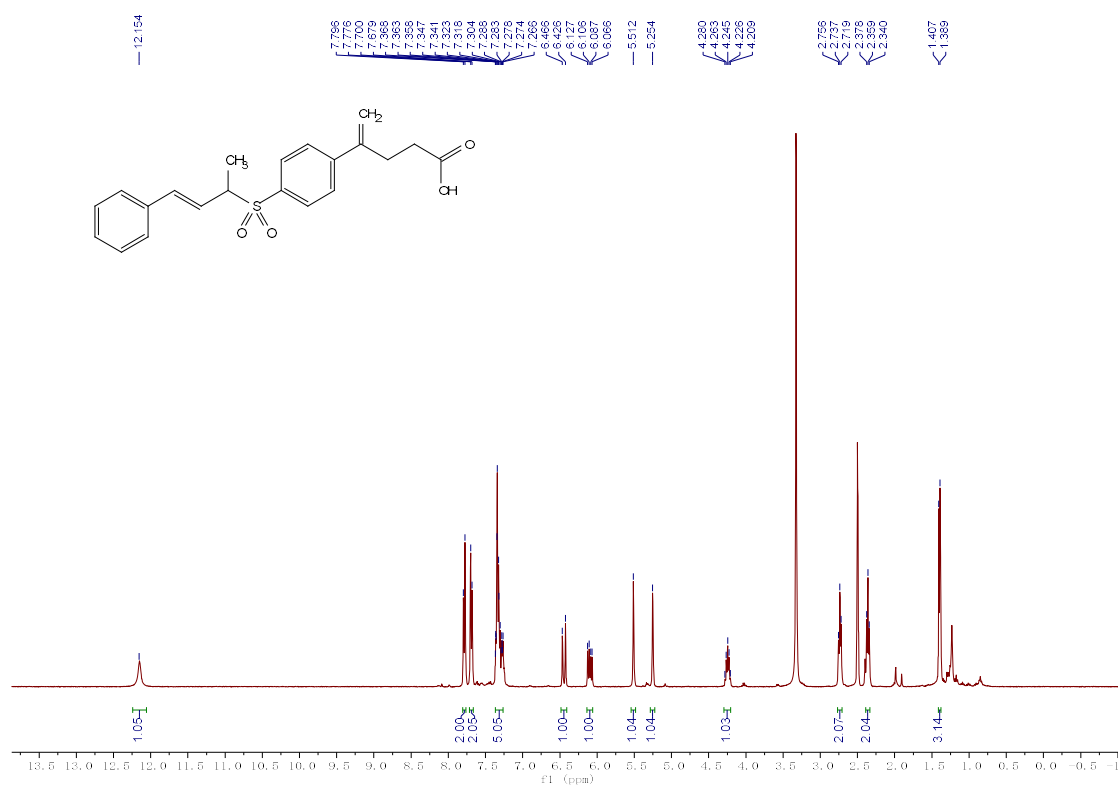

<sup>13</sup>C NMR spectrum (101 MHz, DMSO-*d*<sub>6</sub>) of compound 27

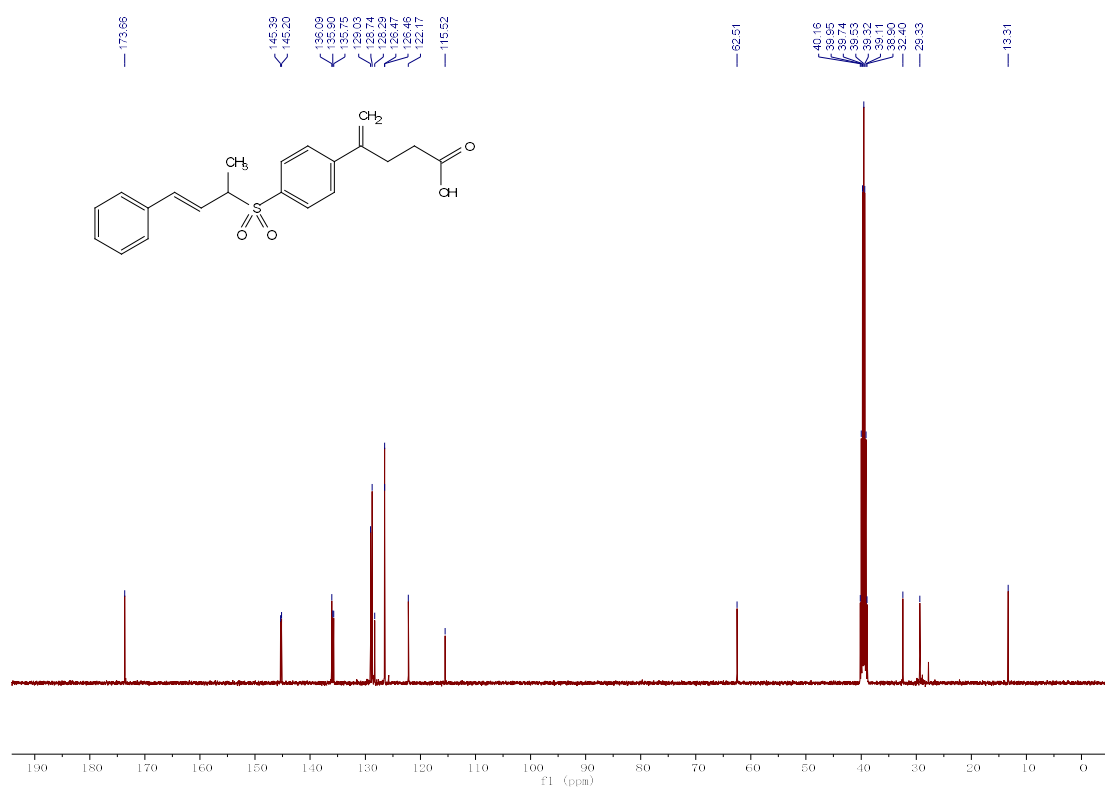

**(*E*)-4-(4-((4-(*tert*-butyl)phenyl)but-3-en-2-yl)sulfonyl)phenyl)morpholine (28).**

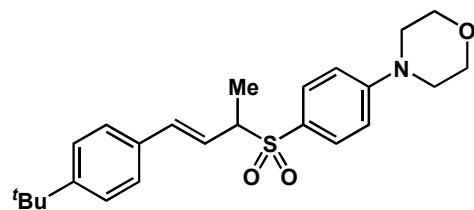

The product (71.1 mg, 86% yield) as yellow solid was purified with silica gel chromatography (petroleum ether/ethyl acetate = 10/1). <sup>1</sup>H NMR (400 MHz, Chloroform-*d*) δ 7.59 (d, *J* = 8.8 Hz, 2H), 7.25 (d, *J* = 8.0 Hz, 2H), 7.16 (d, *J* = 8.4 Hz, 2H), 6.79 (d, *J* = 8.8 Hz, 2H), 6.26 (d, *J* = 16.0 Hz, 1H), 5.97 (dd, *J* = 16.0 Hz, 8.4 Hz, 1H), 3.77-3.71 (m, 5H), 3.21-3.19 (m, 4H), 1.43 (d, *J* = 6.8 Hz, 3H), 1.23 (s, 9H); <sup>13</sup>C NMR (101 MHz, CDCl<sub>3</sub>) δ 154.2, 151.4, 135.7, 133.3, 131.0, 126.3, 125.54, 125.50, 121.8, 113.3, 66.4, 64.2, 47.4, 34.6, 31.2, 13.8; HRMS Calculated for C<sub>24</sub>H<sub>31</sub>NO<sub>3</sub>S (M+H<sup>+</sup>): 414.2097; Found: 414.2098.

**<sup>1</sup>H NMR spectrum (400 MHz, CDCl<sub>3</sub>) of compound 28**

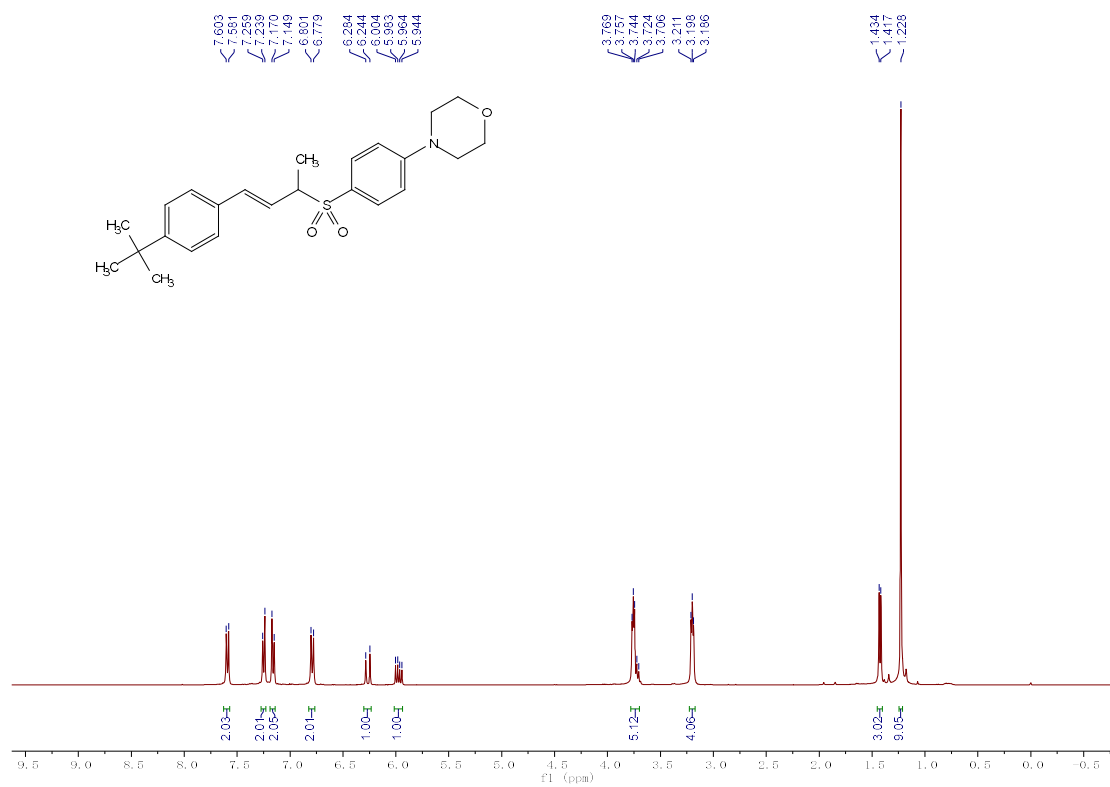

**<sup>13</sup>C NMR spectrum (101 MHz, CDCl<sub>3</sub>) of compound 28**

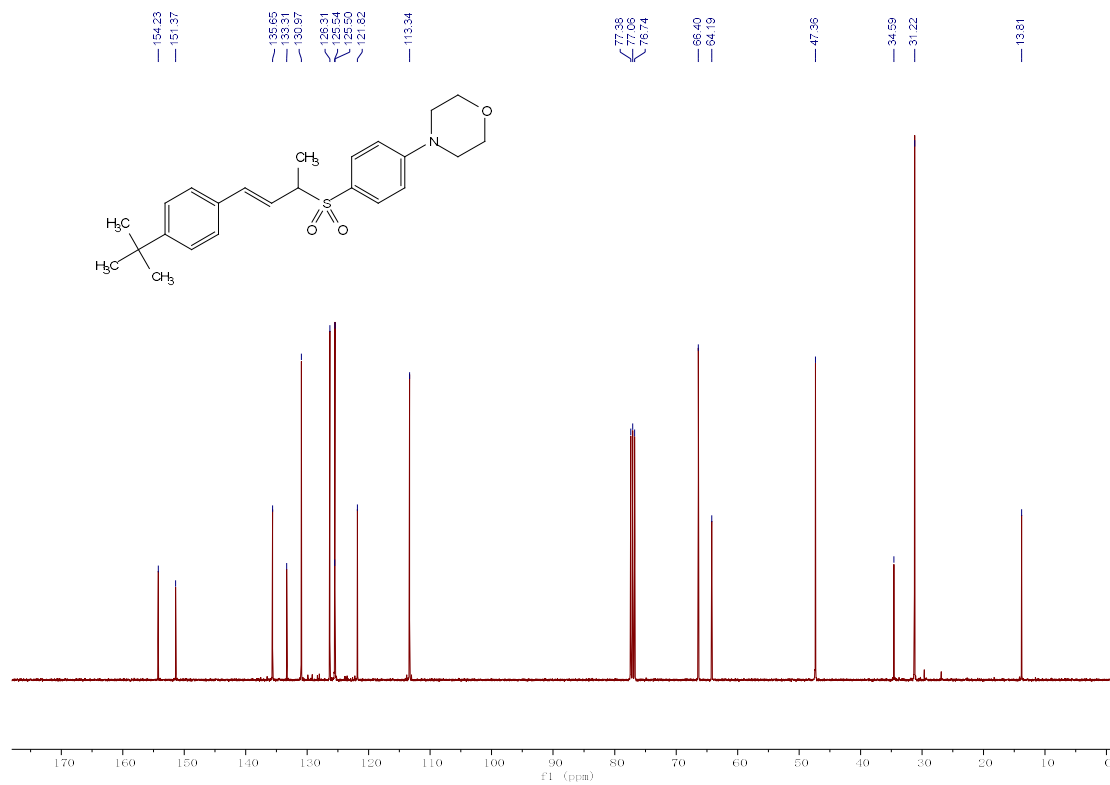



**(E)-5-methoxy-2-((4-(4-methoxyphenyl)but-3-en-2-yl)sulfonyl)pyridine (29).**

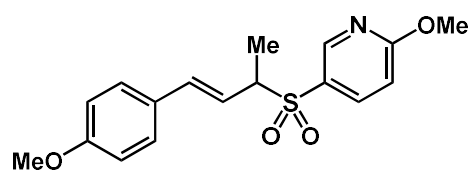

The product (55.3 mg, 83% yield) as brown solid was purified with silica gel chromatography (petroleum ether/ethyl acetate = 5/1). **<sup>1</sup>H NMR (400 MHz, CDCl<sub>3</sub>)** δ 8.53 (s, 1H), 7.81 (d, *J* = 8.8 Hz, 1H), 7.16 (d, *J* = 8.0 Hz, 2H), 6.76 (d, *J* = 7.6 Hz, 2H), 6.70 (d, *J* = 8.4 Hz, 1H), 6.23 (d, *J* = 15.6 Hz, 1H), 5.86 (dd, *J* = 15.6 Hz, 8.0 Hz, 1H), 3.91 (s, 3H), 3.73 (s, 3H), 1.47 (d, *J* = 6.4 Hz, 3H); **<sup>13</sup>C NMR (101 MHz, CDCl<sub>3</sub>)** δ 167.1, 159.9, 149.6, 139.3, 136.3, 128.4, 127.9, 126.2, 119.4, 114.1, 111.0, 64.6, 55.3, 54.4, 13.6; **HRMS** Calculated for C<sub>17</sub>H<sub>19</sub>NO<sub>4</sub>S (M+H<sup>+</sup>): 334.1108; Found: 334.1107.

**<sup>1</sup>H NMR spectrum (400 MHz, CDCl<sub>3</sub>) of compound 29**

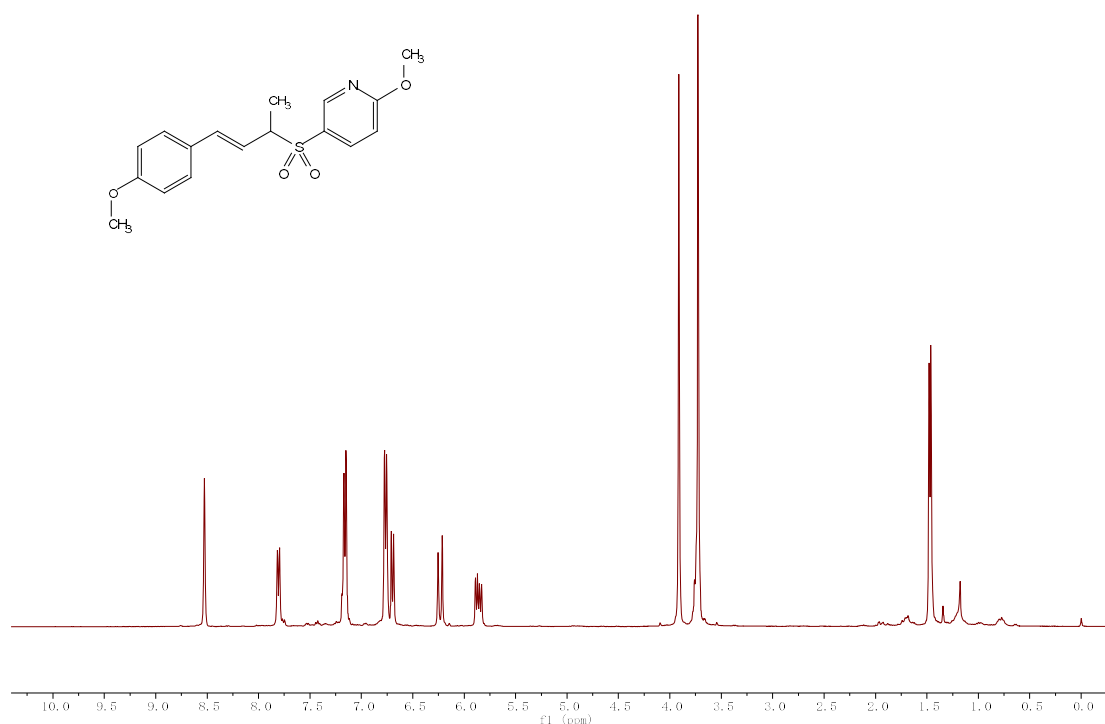

<sup>13</sup>C NMR spectrum (101 MHz, CDCl<sub>3</sub>) of compound **29**

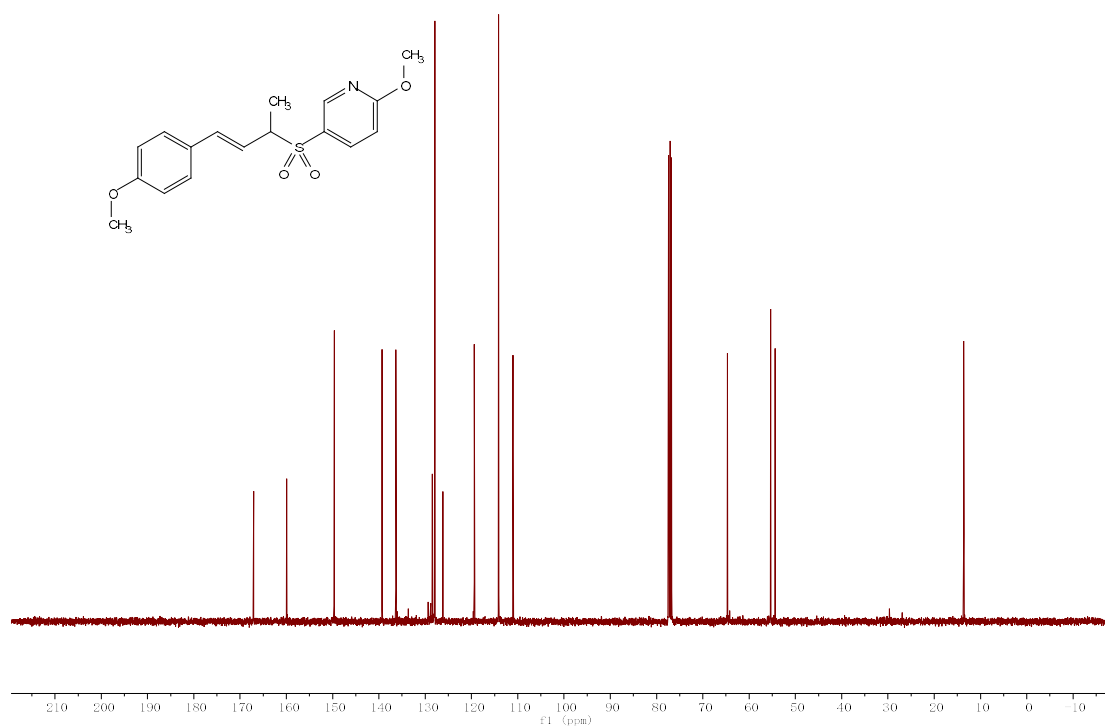

**(E)-5-((4-(4-(trifluoromethyl)phenyl)but-3-en-2-yl)sulfonyl)-2,3-dihydrobenzofuran (30).**

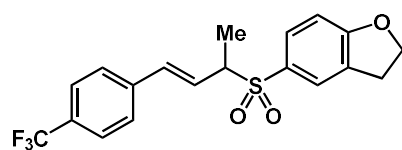

The product (52.0 mg, 68% yield) as yellow oil was purified with silica gel chromatography (petroleum ether/ethyl acetate = 10/1). <sup>1</sup>H NMR (400 MHz, CDCl<sub>3</sub>) δ 7.56-7.47 (m, 4H), 7.32 (d, *J* = 8.0 Hz, 2H), 6.76 (d, *J* = 8.4 Hz, 1H), 6.33 (d, *J* = 16.0 Hz, 1H), 6.13 (dd, *J* = 16.0 Hz, 8.4 Hz, 1H), 4.59 (t, *J* = 8.8 Hz, 2H), 3.80-3.73 (m, 1H), 3.18-3.09 (m, 2H), 1.46 (d, *J* = 7.2 Hz, 3H); <sup>19</sup>F NMR (376 MHz, CDCl<sub>3</sub>) δ -62.62 (s, 1F); <sup>13</sup>C NMR (101 MHz, CDCl<sub>3</sub>) δ 164.8, 139.4, 134.8, 131.0, 130.0 (q, *J* = 32.3 Hz), 128.3, 128.3, 126.7, 126.4, 125.6 (q, *J* = 4.0 Hz), 125.3, 124.0 (q, *J* = 272.7 Hz), 109.5, 72.4, 64.1, 28.9, 13.7; HRMS Calculated for C<sub>19</sub>H<sub>17</sub>F<sub>3</sub>O<sub>3</sub>S (M+Na<sup>+</sup>): 405.0743; Found: 405.0742.

**<sup>1</sup>H NMR spectrum (400 MHz, CDCl<sub>3</sub>) of compound 30**

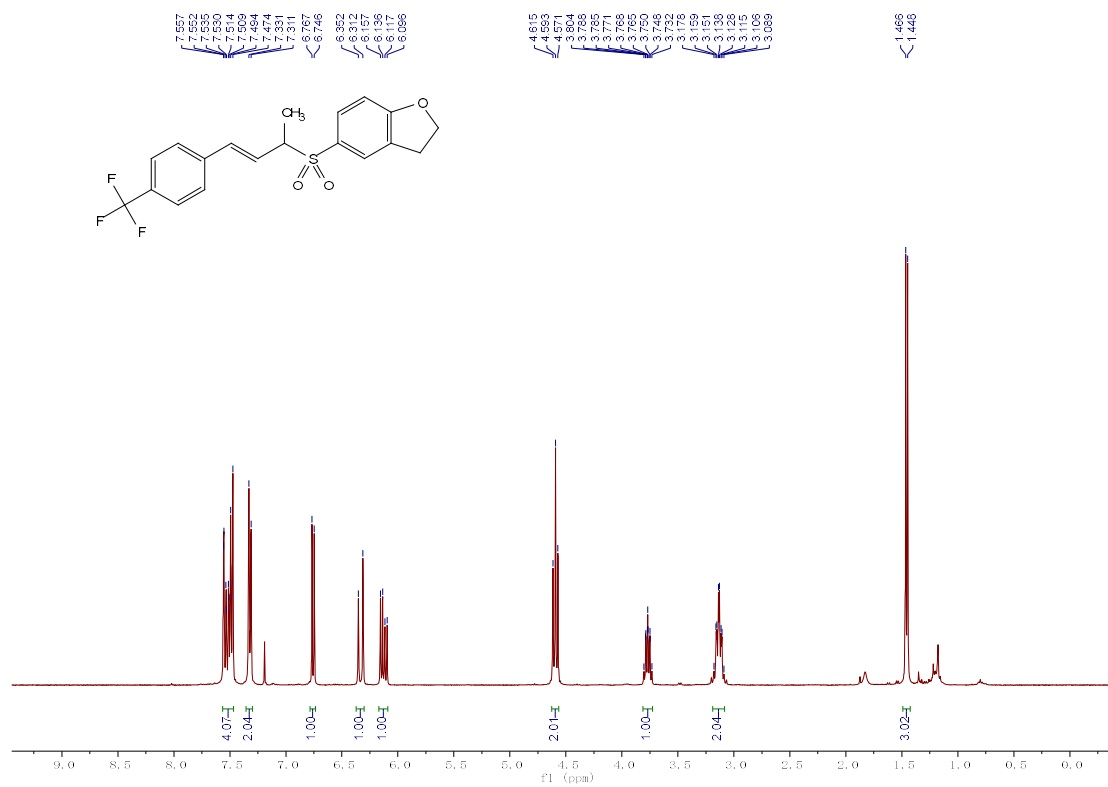

**<sup>19</sup>F NMR spectrum (376 MHz, CDCl<sub>3</sub>) of compound 30**

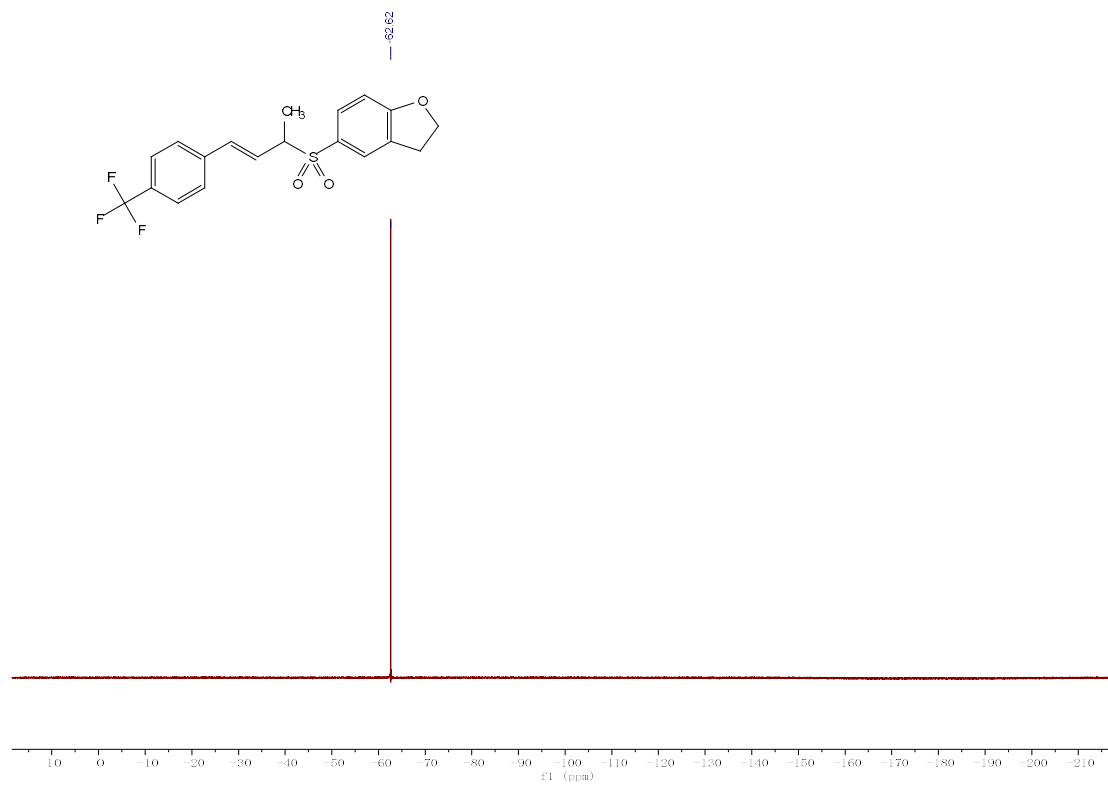



**<sup>1</sup>H NMR spectrum (400 MHz, CDCl<sub>3</sub>) of compound 31**

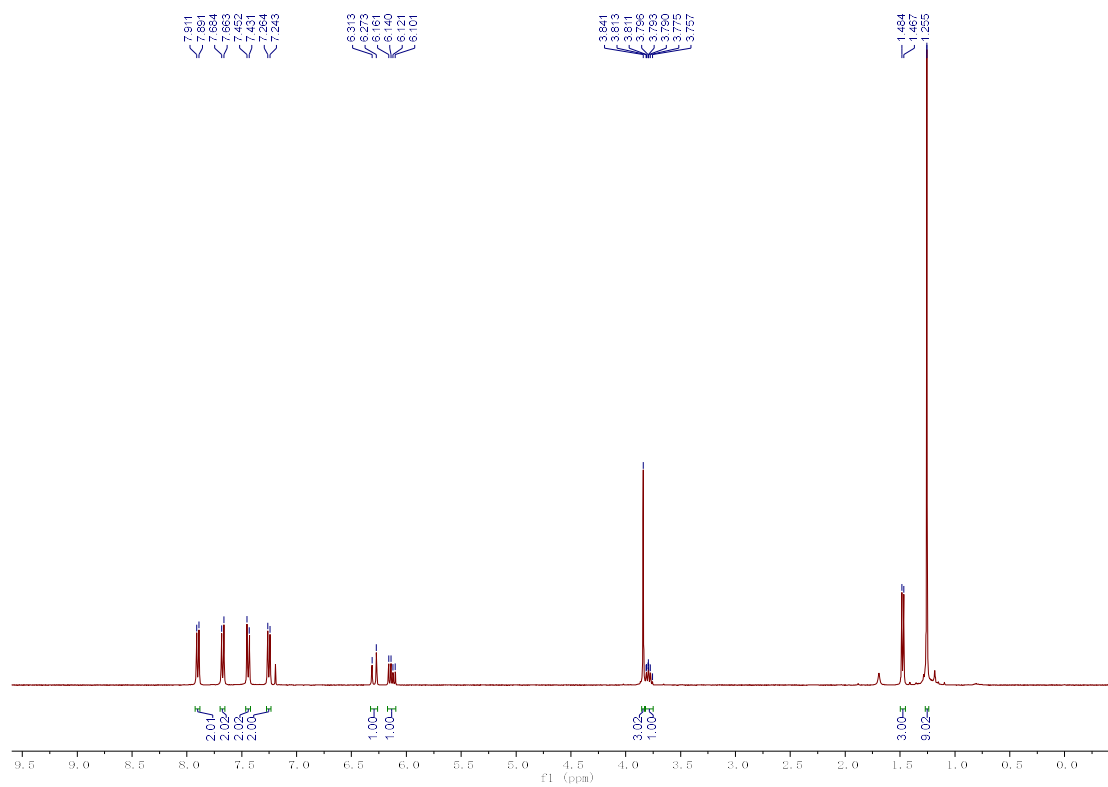

**<sup>13</sup>C NMR spectrum (101 MHz, CDCl<sub>3</sub>) of compound 31**

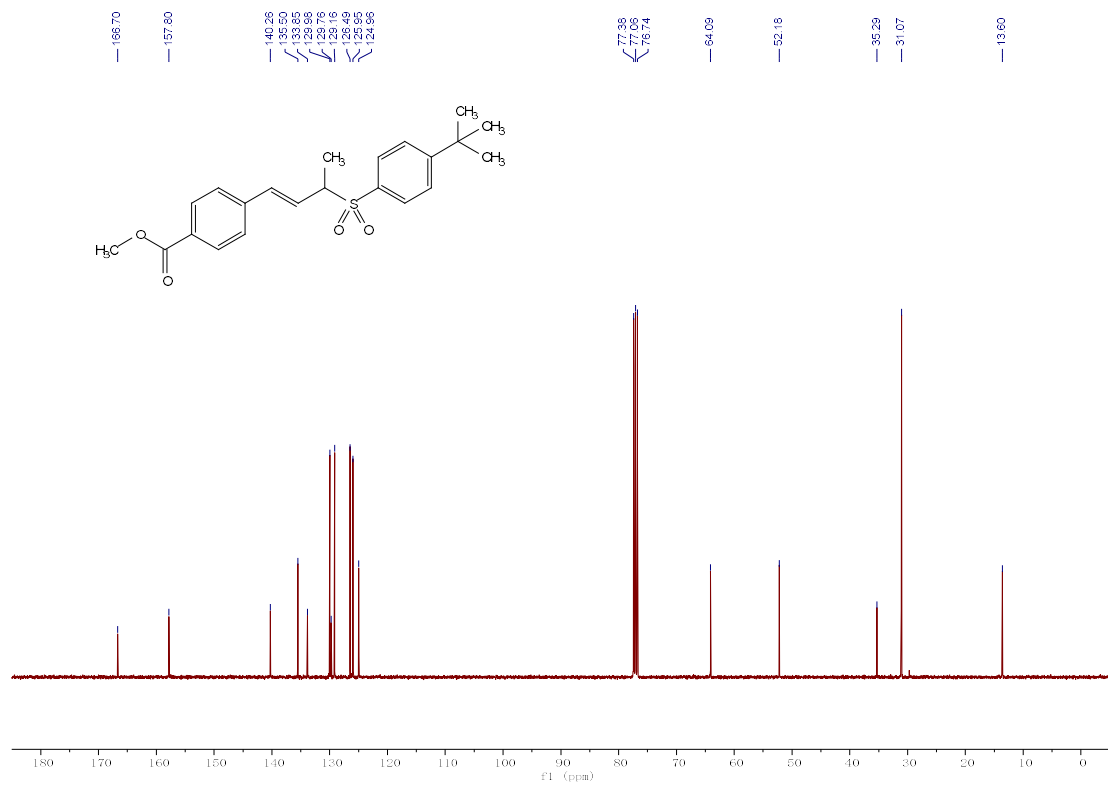

**(E)-methyl(4-((4-(4-(methylsulfonyl)phenyl)but-3-en-2-yl)sulfonyl)phenyl)sulfane (32).**

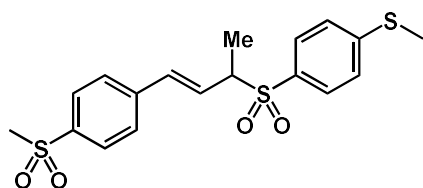

The product (57.9 mg, 73% yield) as yellow solid was purified with silica gel chromatography (petroleum ether/ethyl acetate = 2/1).  $^1\text{H NMR}$  (400 MHz,  $\text{CDCl}_3$ )  $\delta$  7.82 (d,  $J = 8.4$  Hz, 2H), 7.63 (d,  $J = 8.8$  Hz, 2H), 7.41 (d,  $J = 8.4$  Hz, 2H), 7.23 (d,  $J = 8.4$  Hz, 2H), 6.37 (d,  $J = 16.0$  Hz, 1H), 6.19 (dd,  $J = 16.0$  Hz, 8.0 Hz, 1H), 3.86-3.78 (m, 1H), 2.99 (s, 3H), 2.45 (s, 3H), 1.47 (d,  $J = 6.8$  Hz, 3H);  $^{13}\text{C NMR}$  (101 MHz,  $\text{CDCl}_3$ )  $\delta$  147.7, 141.1, 139.9, 134.6, 132.3, 129.5, 127.9, 127.3, 126.4, 125.0, 64.0, 44.5, 14.7, 13.6; HRMS Calculated for  $\text{C}_{18}\text{H}_{20}\text{O}_4\text{S}_3$  ( $\text{M}+\text{Na}^+$ ): 419.0416; Found: 419.0416.

$^1\text{H NMR}$  spectrum (400 MHz,  $\text{CDCl}_3$ ) of compound **32**

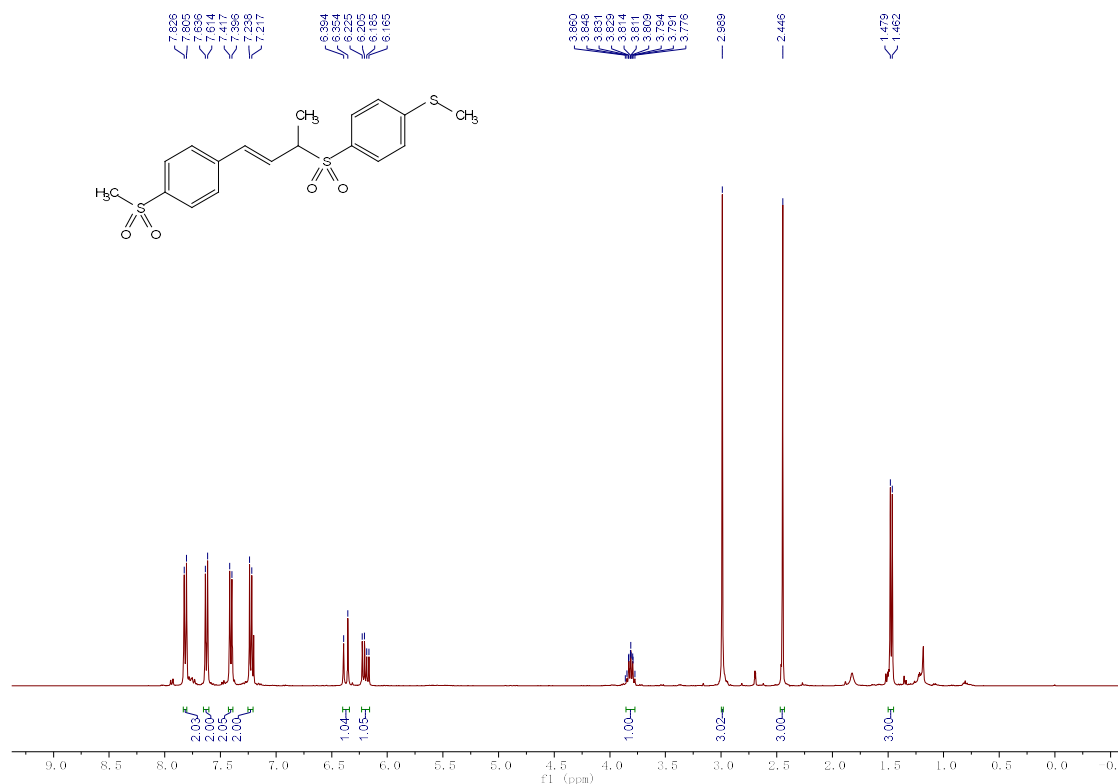

<sup>13</sup>C NMR spectrum (101 MHz, CDCl<sub>3</sub>) of compound **32**

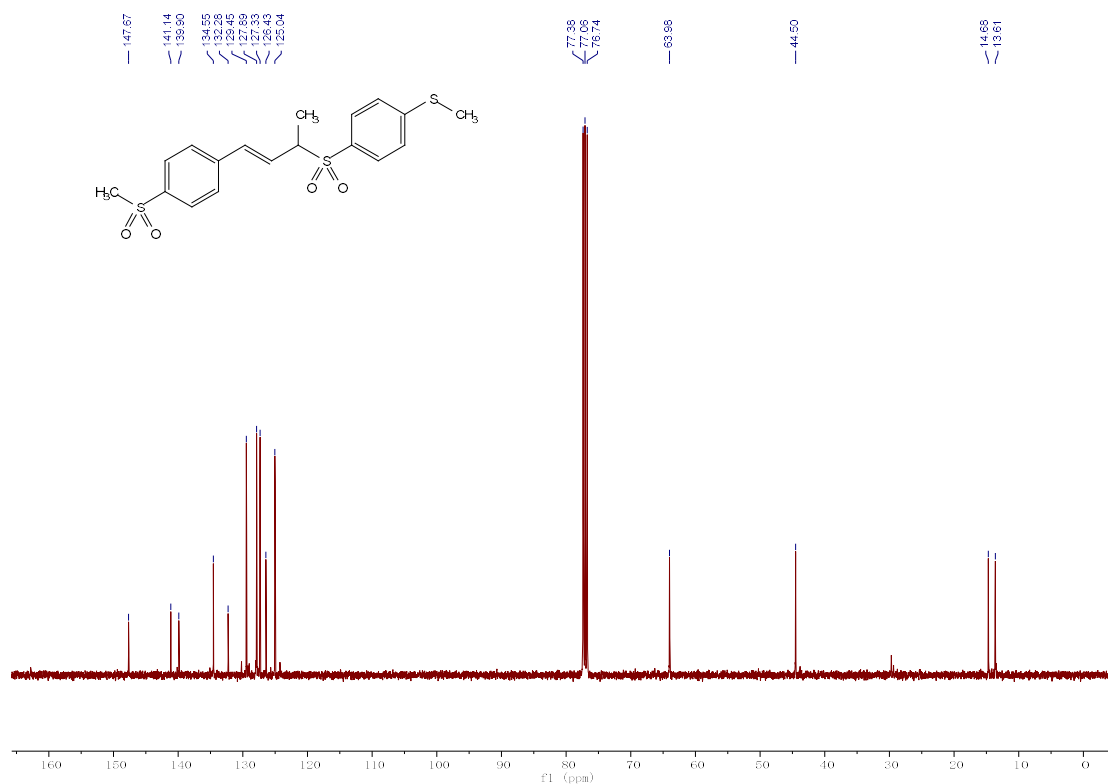

**(E)-4-(4-((4-(4-fluorophenyl)but-3-en-2-yl)sulfonyl)phenoxy)butanenitrile (33).**

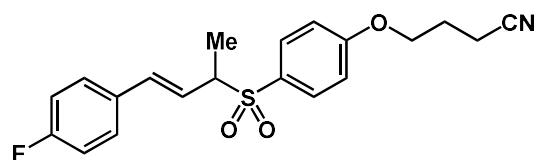

The product (54.5 mg, 73% yield) as yellow oil was purified with silica gel chromatography (petroleum ether/ethyl acetate = 3/1). <sup>1</sup>H NMR (400 MHz, CDCl<sub>3</sub>) δ 7.67 (d, *J* = 8.8 Hz, 2H), 7.22-7.17 (m, 2H), 6.95-6.87 (m, 4H), 6.25 (d, *J* = 16.0 Hz, 1H), 5.92 (dd, *J* = 16.0 Hz, 8.0 Hz, 1H), 4.05 (t, *J* = 5.6 Hz, 2H), 3.78-3.70 (m, 1H), 2.53 (t, *J* = 7.2 Hz, 2H), 2.12-2.06 (m, 2H), 1.44 (d, *J* = 7.2 Hz, 3H); <sup>19</sup>F NMR (376 MHz, CDCl<sub>3</sub>) δ -113.00 (s, 1F); <sup>13</sup>C NMR (101 MHz, CDCl<sub>3</sub>) δ 162.7 (d, *J* = 249.5 Hz), 162.5, 135.1, 132.1 (d, *J* = 3.0 Hz), 131.5, 129.0, 128.2 (d, *J* = 8.1 Hz), 121.9 (d, *J* = 2.0 Hz), 118.9, 115.6 (d, *J* = 22.2 Hz), 114.5, 65.7, 64.1, 25.1, 14.1, 13.7; HRMS Calculated for C<sub>20</sub>H<sub>20</sub>FNO<sub>3</sub>S (M+Na<sup>+</sup>): 396.1040; Found: 396.1040.

**<sup>1</sup>H NMR spectrum (400 MHz, CDCl<sub>3</sub>) of compound 33**

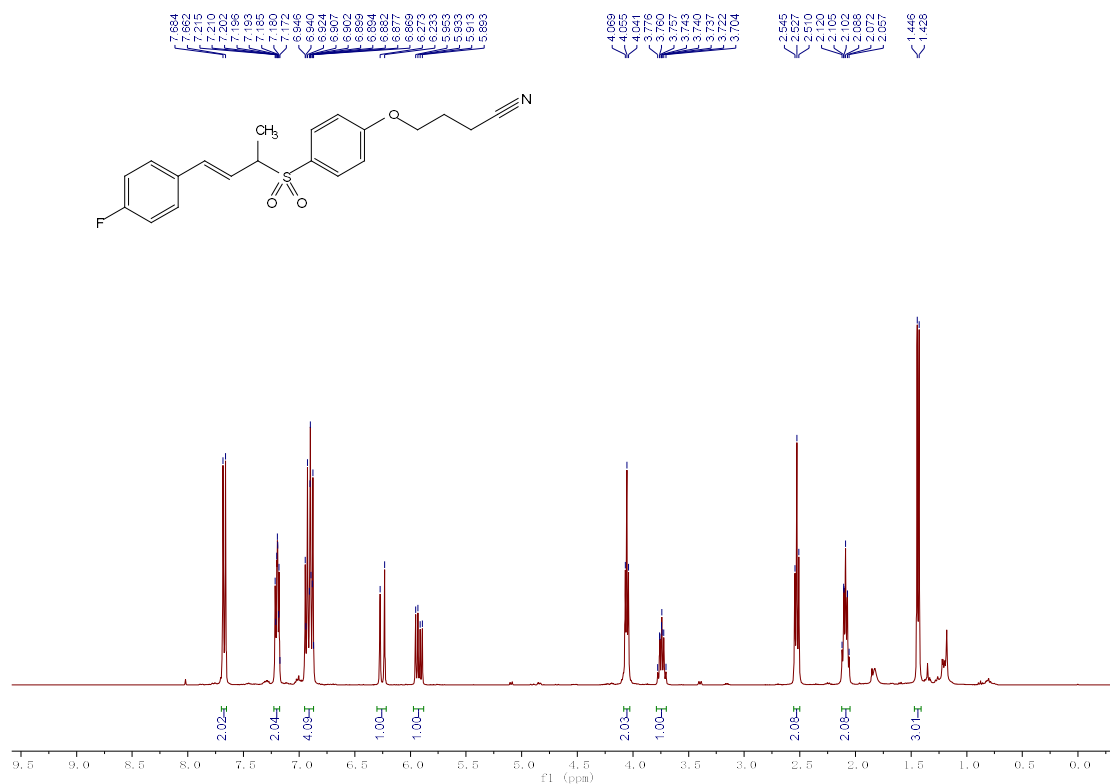

**<sup>19</sup>F NMR spectrum (376 MHz, CDCl<sub>3</sub>) of compound 33**

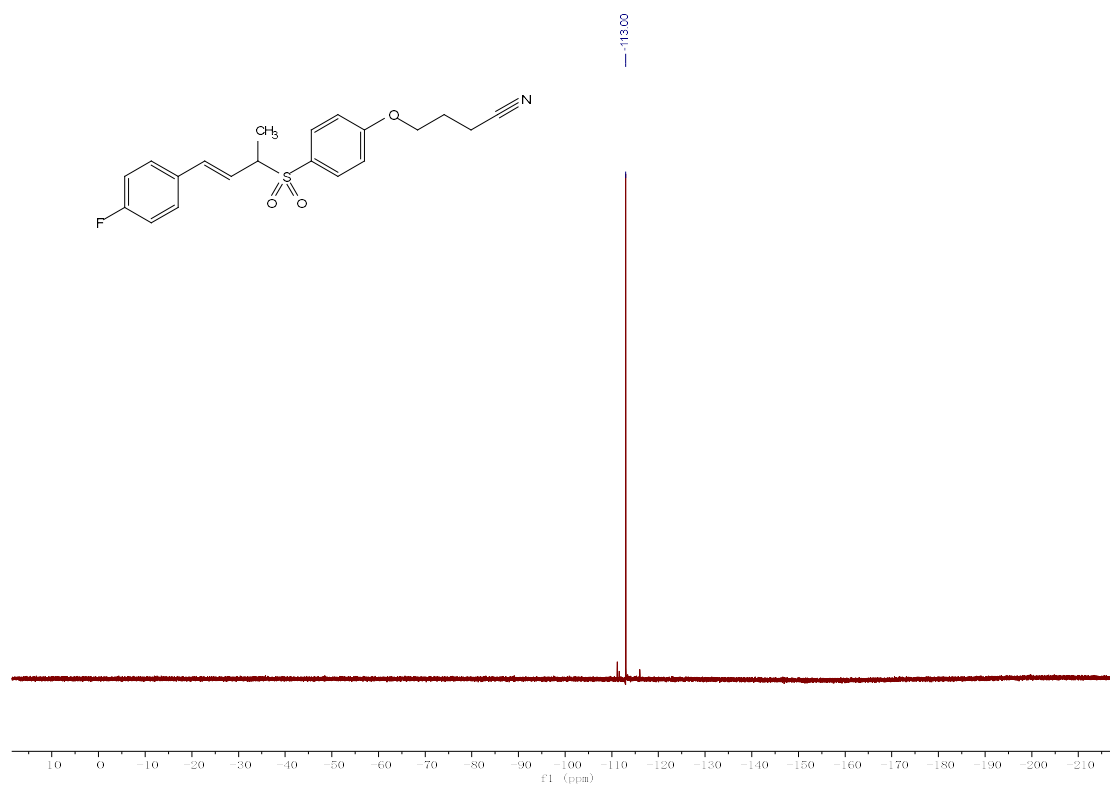



<sup>13</sup>C NMR spectrum (101 MHz, CDCl<sub>3</sub>) of compound **33**

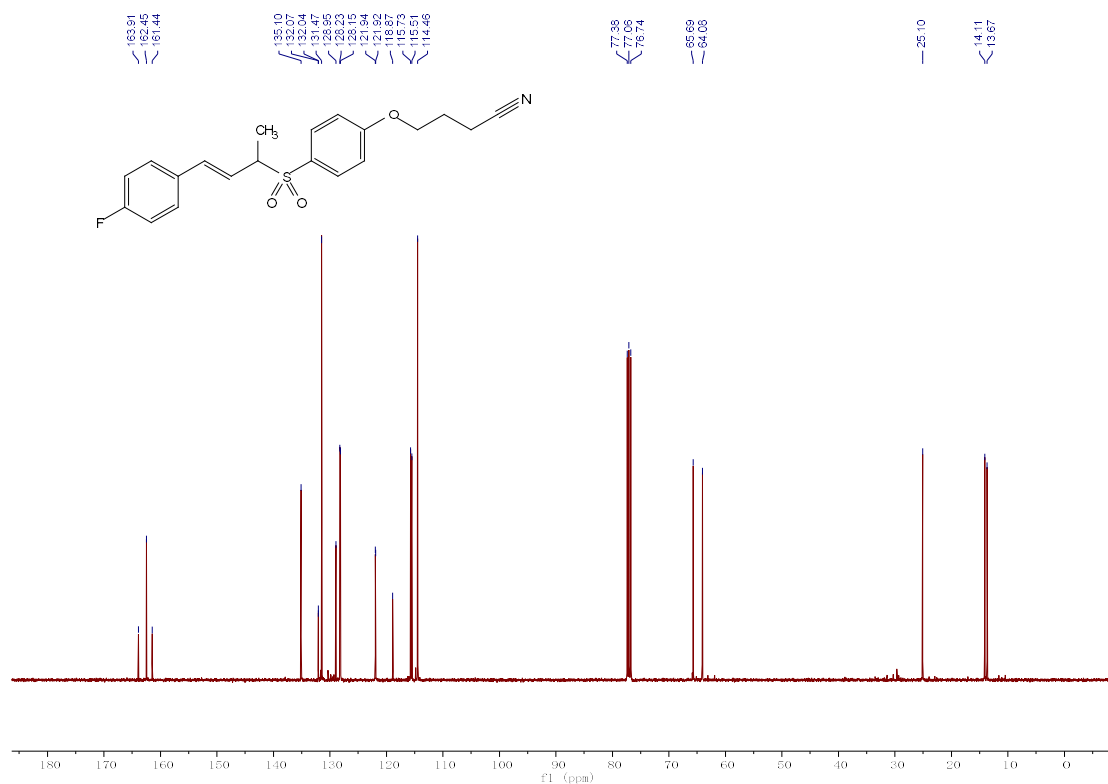

**methyl (E)-3-(4-((4-(4-chlorophenyl)but-3-en-2-yl)sulfonyl)phenyl)propanoate (34).**

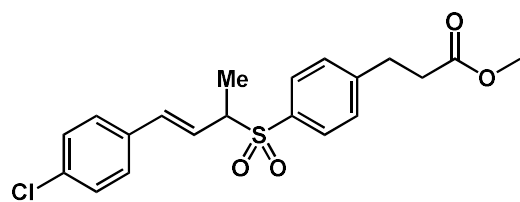

The product (58.8 mg, 75% yield) as brown oil was purified with silica gel chromatography (petroleum ether/ethyl acetate = 3/1). <sup>1</sup>H NMR (400 MHz, CDCl<sub>3</sub>) δ 7.66 (d, *J* = 8.4 Hz, 2H), 7.27 (d, *J* = 8.4 Hz, 2H), 7.19 (d, *J* = 8.4 Hz, 2H), 7.12 (d, *J* = 8.4 Hz, 2H), 6.21 (d, *J* = 16.0 Hz, 1H), 5.97 (dd, *J* = 16.0 Hz, 8.4 Hz, 1H), 3.79-3.72 (m, 1H), 3.57 (s, 3H), 2.94 (t, *J* = 7.6 Hz, 2H), 2.57 (t, *J* = 7.6 Hz, 2H), 1.44 (d, *J* = 7.2 Hz, 3H); <sup>13</sup>C NMR (101 MHz, CDCl<sub>3</sub>) δ 172.6, 147.1, 135.2, 134.9, 134.3, 134.1, 129.5, 128.84, 128.82, 127.8, 122.7, 64.0, 51.7, 34.9, 30.7, 13.5; HRMS Calculated for C<sub>20</sub>H<sub>21</sub>ClO<sub>4</sub>S (M+Na<sup>+</sup>): 415.0741; Found: 415.0742.

**<sup>1</sup>H NMR spectrum (400 MHz, CDCl<sub>3</sub>) of compound 34**

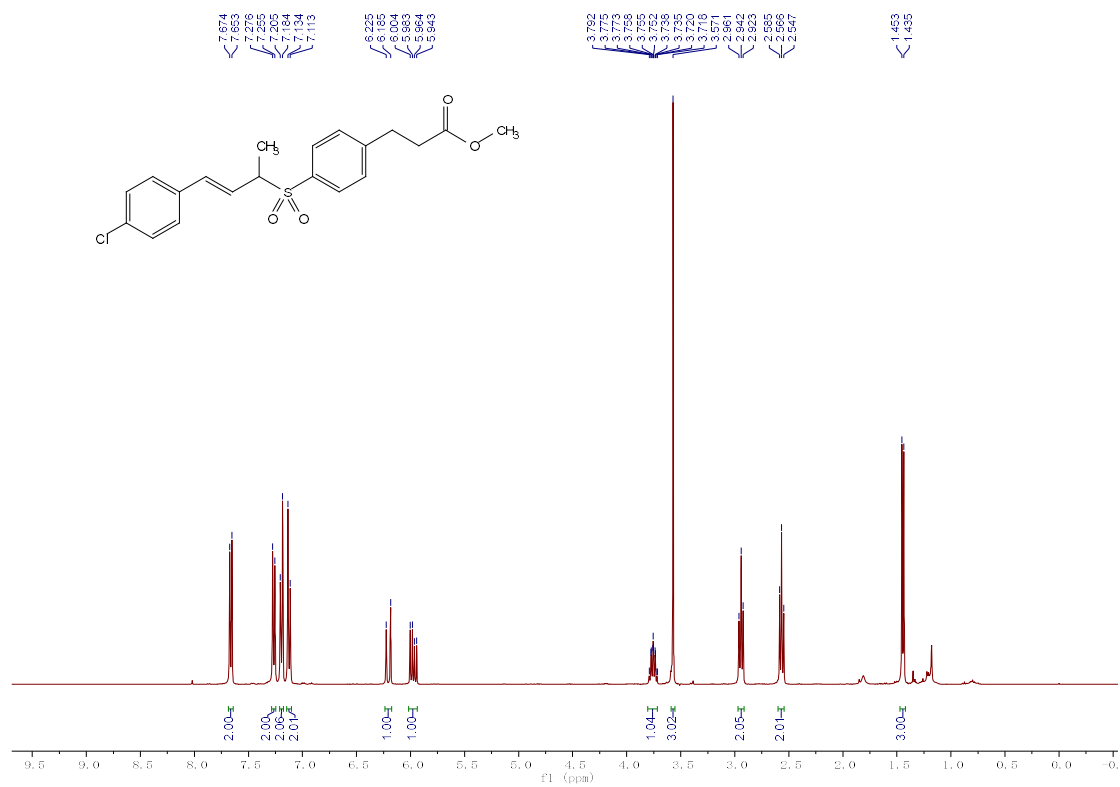

**<sup>13</sup>C NMR spectrum (101 MHz, CDCl<sub>3</sub>) of compound 34**

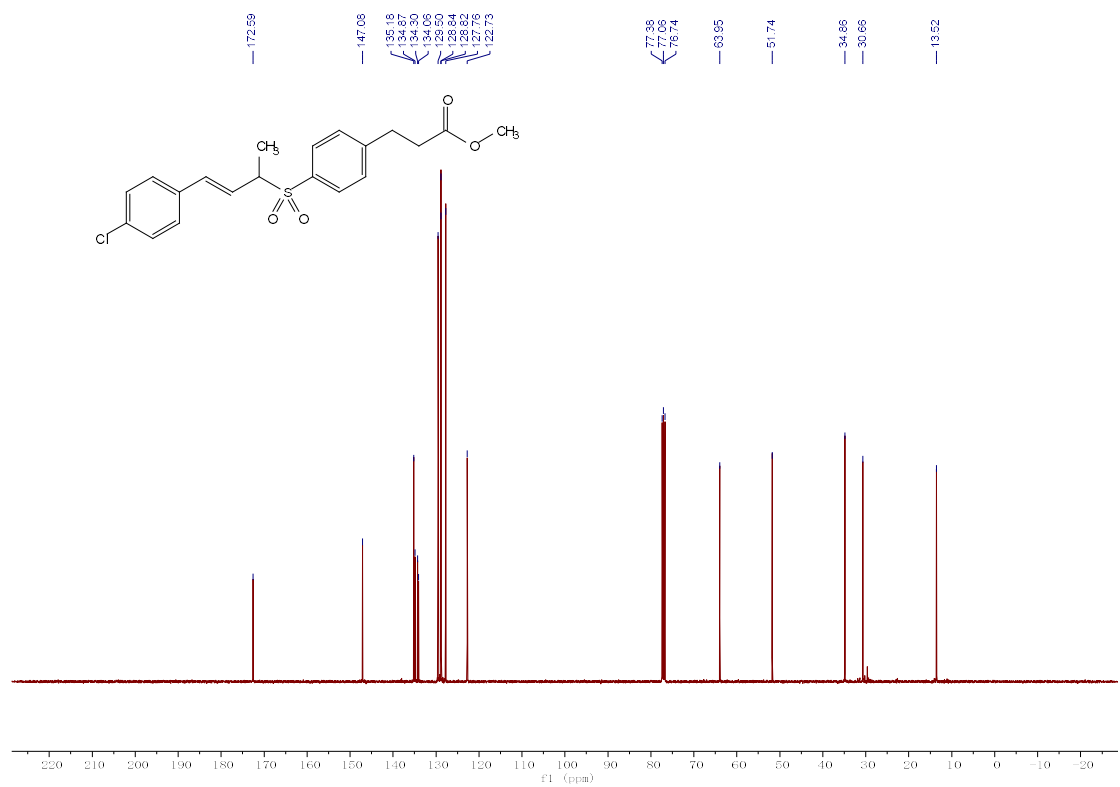

**(E)-1-bromo-4-(3-((4-(prop-1-en-2-yl)phenyl)sulfonyl)but-1-en-1-yl)benzene (35).**

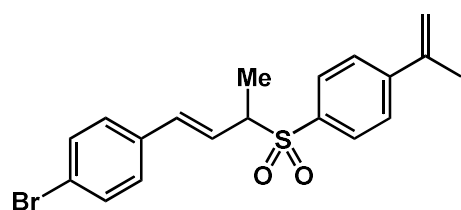

The product (50.9 mg, 65% yield) as yellow solid was purified with silica gel chromatography (petroleum ether/ethyl acetate = 10/1).  $^1\text{H NMR}$  (400 MHz,  $\text{CDCl}_3$ )  $\delta$  7.69 (d,  $J = 8.4$  Hz, 2H), 7.49 (d,  $J = 8.4$  Hz, 2H), 7.35 (d,  $J = 8.4$  Hz, 2H), 7.07 (d,  $J = 8.4$  Hz, 2H), 6.22 (d,  $J = 16.0$  Hz, 1H), 6.01 (dd,  $J = 16.0$  Hz, 8.0 Hz, 1H), 5.40 (s, 1H), 5.17 (s, 1H), 3.81-3.73 (m, 1H), 2.08 (s, 3H), 1.45 (d,  $J = 6.8$  Hz, 3H);  $^{13}\text{C NMR}$  (101 MHz,  $\text{CDCl}_3$ )  $\delta$  146.63, 141.73, 135.37, 135.29, 134.78, 131.80, 129.32, 128.09, 125.86, 122.88, 122.31, 115.89, 64.02, 21.56, 13.58; **HRMS** Calculated for  $\text{C}_{19}\text{H}_{19}\text{BrO}_2\text{S}$  ( $\text{M}+\text{Na}^+$ ): 413.0181; Found: 413.0183.

$^1\text{H NMR}$  spectrum (400 MHz,  $\text{CDCl}_3$ ) of compound **35**

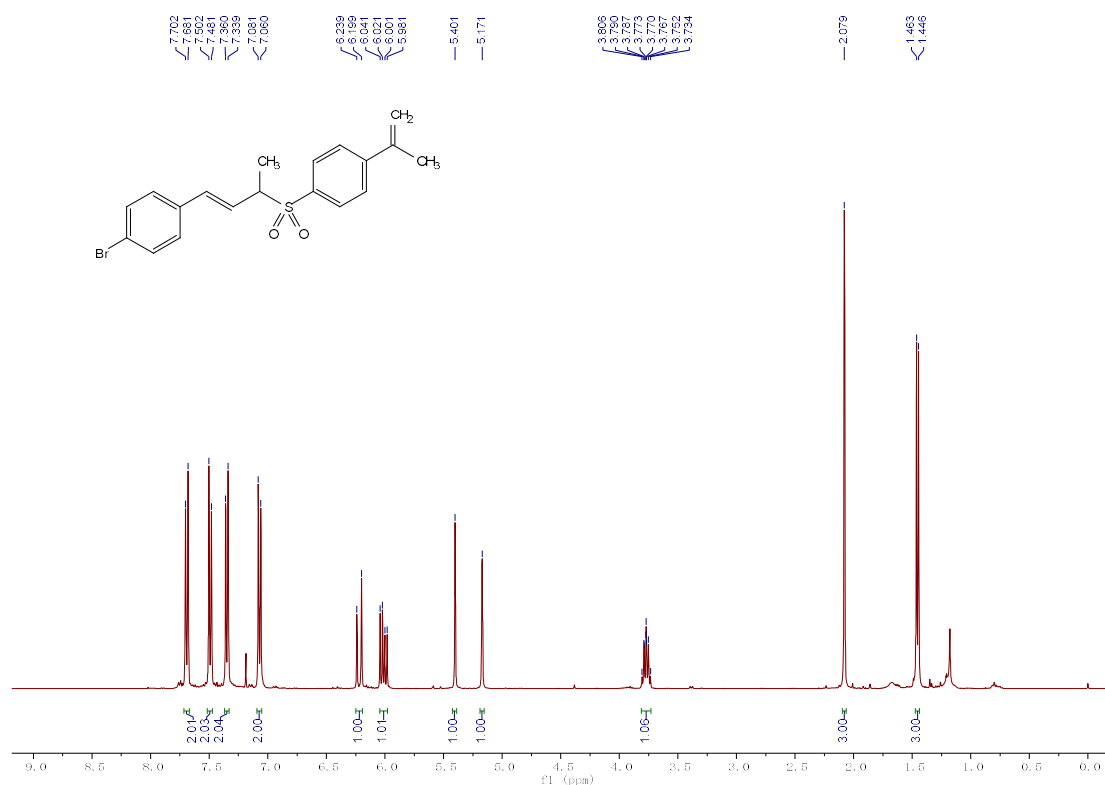

<sup>13</sup>C NMR spectrum (101 MHz, CDCl<sub>3</sub>) of compound **35**

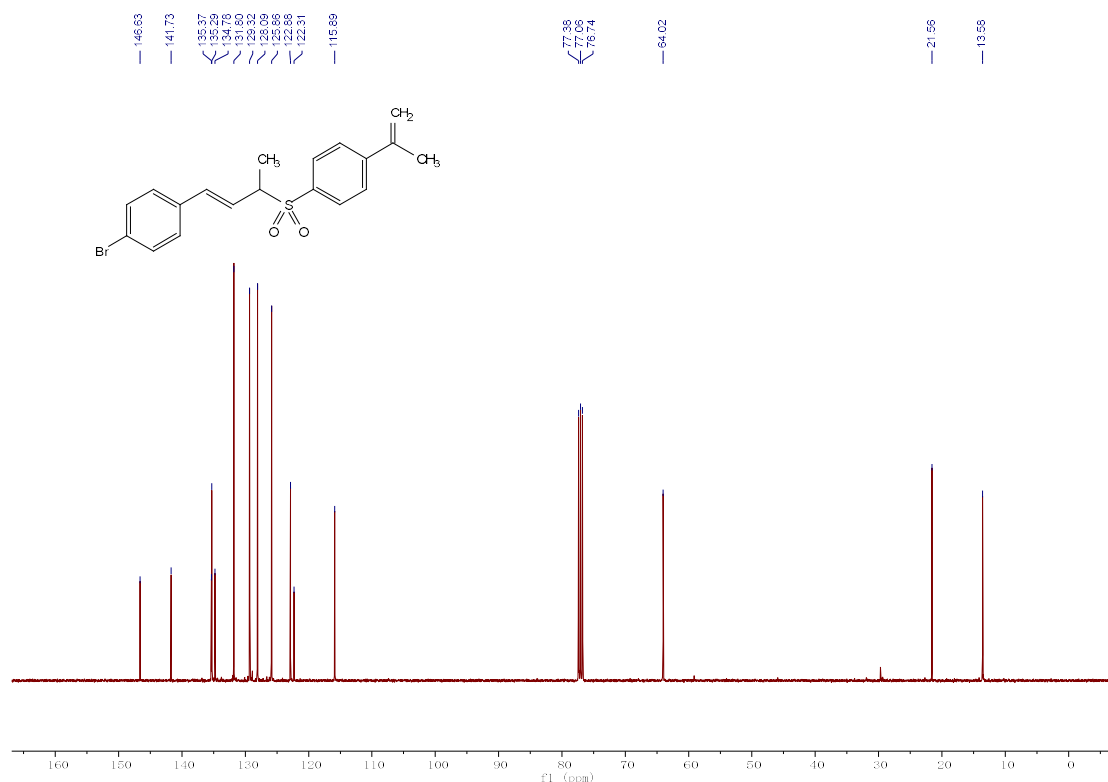

**(E)-4-(3-tosylbut-1-en-1-yl)phenyl 4-methylbenzenesulfonate (36).**

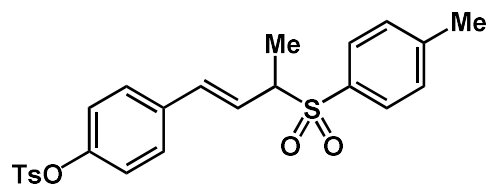

The product (65.8 mg, 72% yield) as yellow solid was purified with silica gel chromatography (petroleum ether/ethyl acetate = 5/1). <sup>1</sup>H NMR (400 MHz, CDCl<sub>3</sub>) δ 7.62 (d, *J* = 8.0 Hz, 4H), 7.25-7.22 (m, 4H), 7.12 (d, *J* = 8.4 Hz, 2H), 6.84 (d, *J* = 8.4 Hz, 2H), 6.25 (d, *J* = 16.0 Hz, 1H), 5.95 (dd, *J* = 16.0 Hz, 8.0 Hz, 1H), 3.78-3.71 (m, 1H), 2.37 (s, 3H), 2.35 (s, 3H), 1.41 (d, *J* = 6.8 Hz, 3H); <sup>13</sup>C NMR (101 MHz, CDCl<sub>3</sub>) δ 149.3, 145.5, 144.8, 134.91, 134.88, 134.0, 132.2, 129.8, 129.6, 129.2, 128.5, 127.7, 123.2, 122.6, 63.9, 21.7, 21.6, 13.7; HRMS Calculated for C<sub>24</sub>H<sub>24</sub>O<sub>5</sub>S<sub>2</sub> (M+Na<sup>+</sup>): 479.0957; Found: 479.0959.

**<sup>1</sup>H NMR spectrum (400 MHz, CDCl<sub>3</sub>) of compound 36**

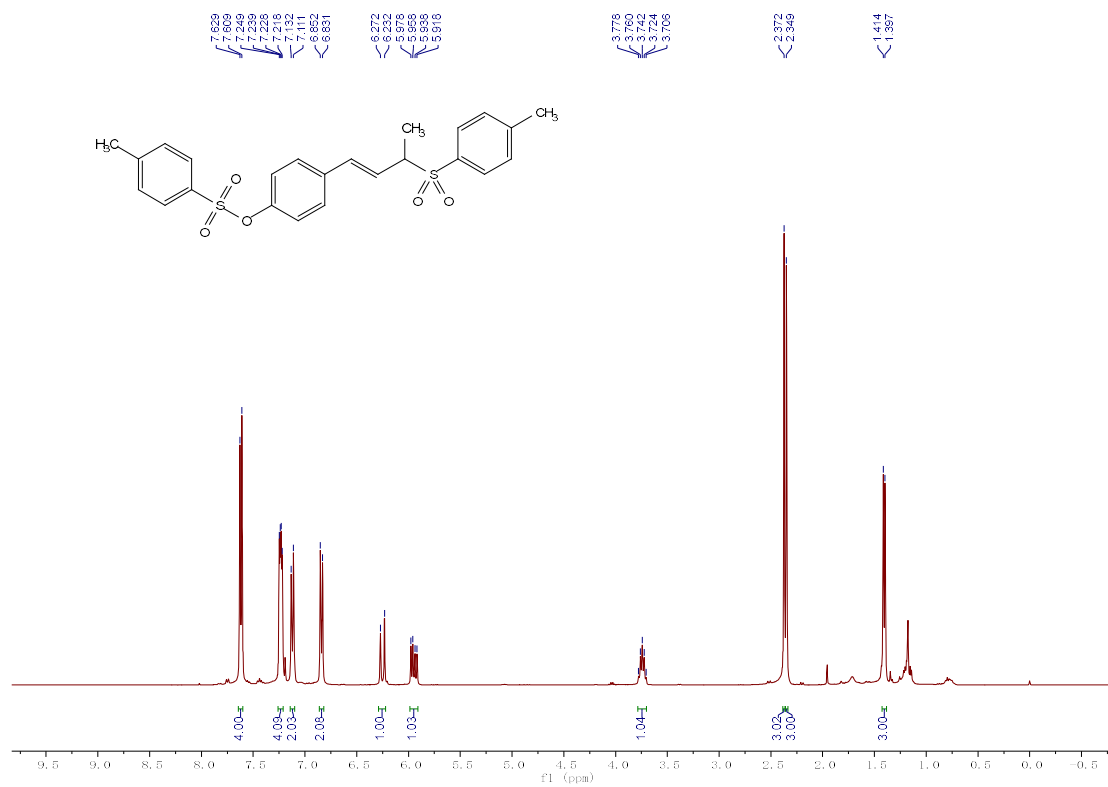

**<sup>13</sup>C NMR spectrum (101 MHz, CDCl<sub>3</sub>) of compound 36**

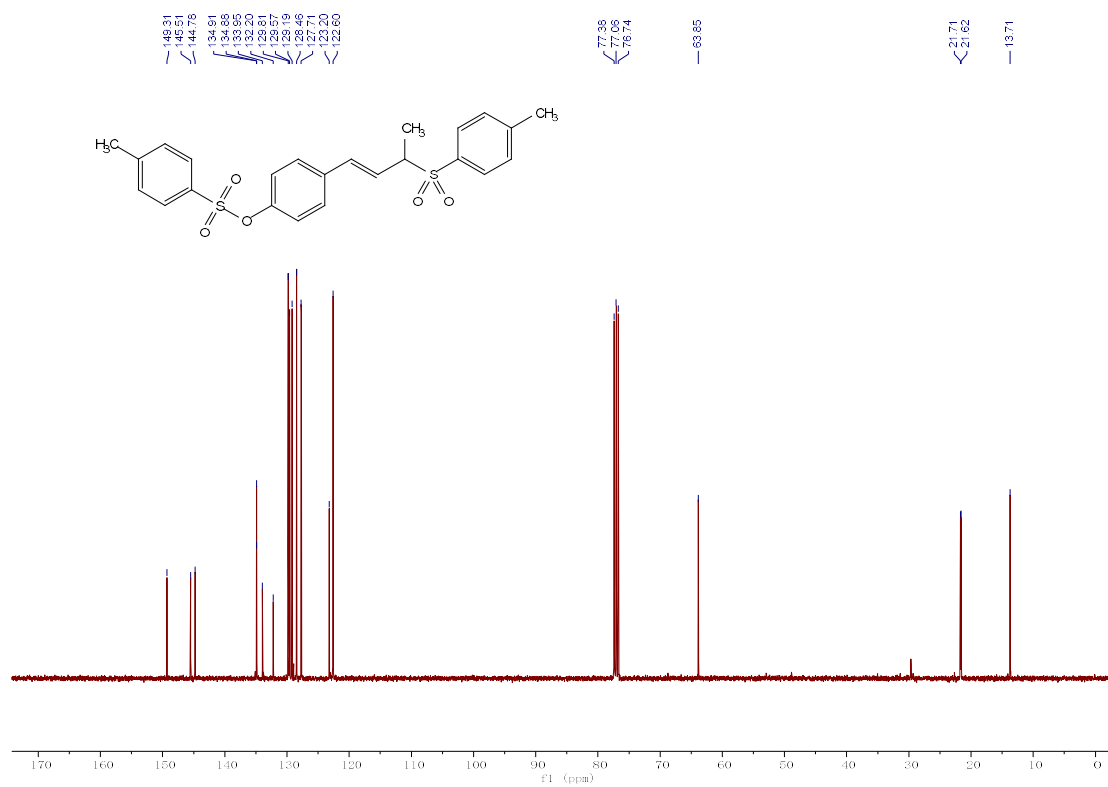

**(E)-4-(3-((3,4-dimethylphenyl)sulfonyl)but-1-en-1-yl)phenyl acetate (37).**

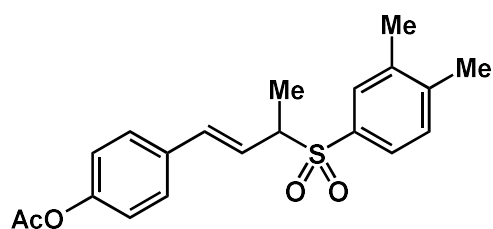

The product (44.5 mg, 62% yield) as brown solid was purified with silica gel chromatography (petroleum ether/ethyl acetate = 5/1).  $^1\text{H NMR}$  (400 MHz,  $\text{CDCl}_3$ )  $\delta$  7.50 (s, 1H), 7.46 (d,  $J = 7.6$  Hz, 1H), 7.22-7.16 (m, 3H), 6.96 (d,  $J = 8.0$  Hz, 2H), 6.25 (d,  $J = 15.6$  Hz, 1H), 5.96 (dd,  $J = 16.0$  Hz, 8.4 Hz, 1H), 3.78-3.71 (m, 1H), 2.24-2.20 (m, 9H), 1.44 (d,  $J = 6.8$  Hz, 3H);  $^{13}\text{C NMR}$  (101 MHz,  $\text{CDCl}_3$ )  $\delta$  169.4, 150.6, 143.4, 137.7, 135.2, 134.1, 133.8, 130.0, 127.6, 126.8, 122.7, 121.8, 64.0, 21.1, 20.0, 19.7, 13.6; HRMS Calculated for  $\text{C}_{20}\text{H}_{22}\text{O}_4\text{S}$  ( $\text{M}+\text{Na}^+$ ): 381.1131; Found: 381.1129.

$^1\text{H NMR}$  spectrum (400 MHz,  $\text{CDCl}_3$ ) of compound 37

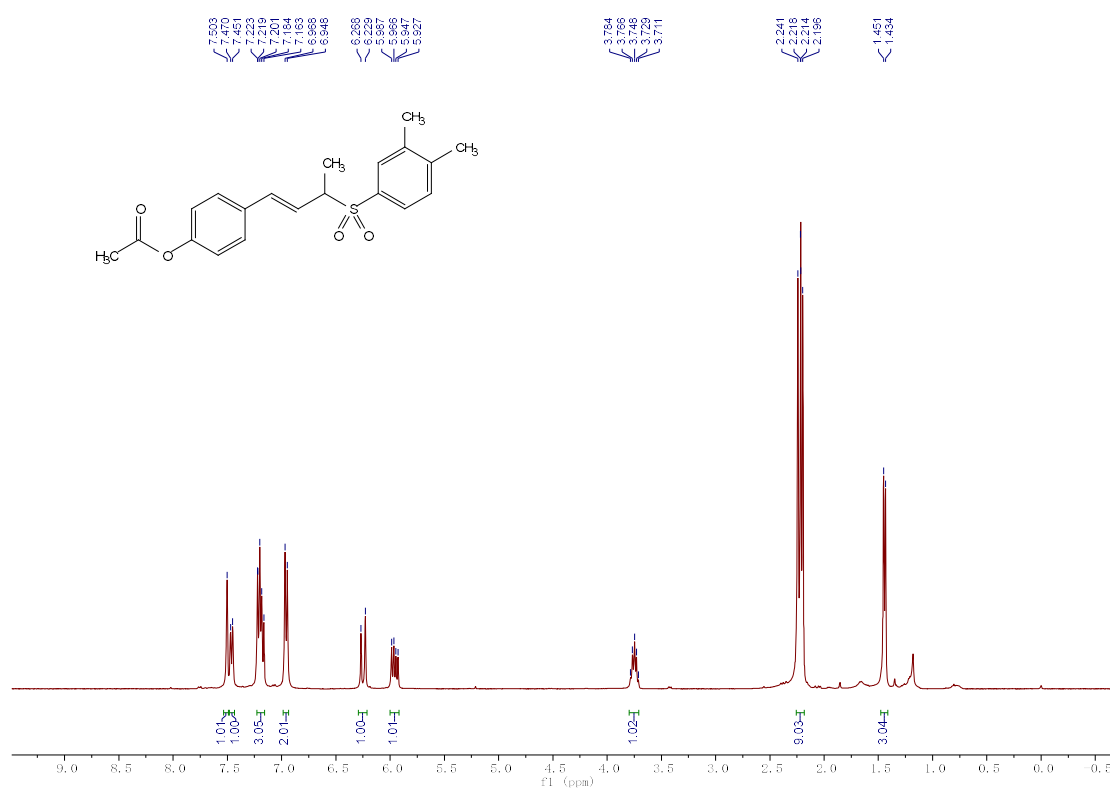

<sup>13</sup>C NMR spectrum (101 MHz, CDCl<sub>3</sub>) of compound **37**

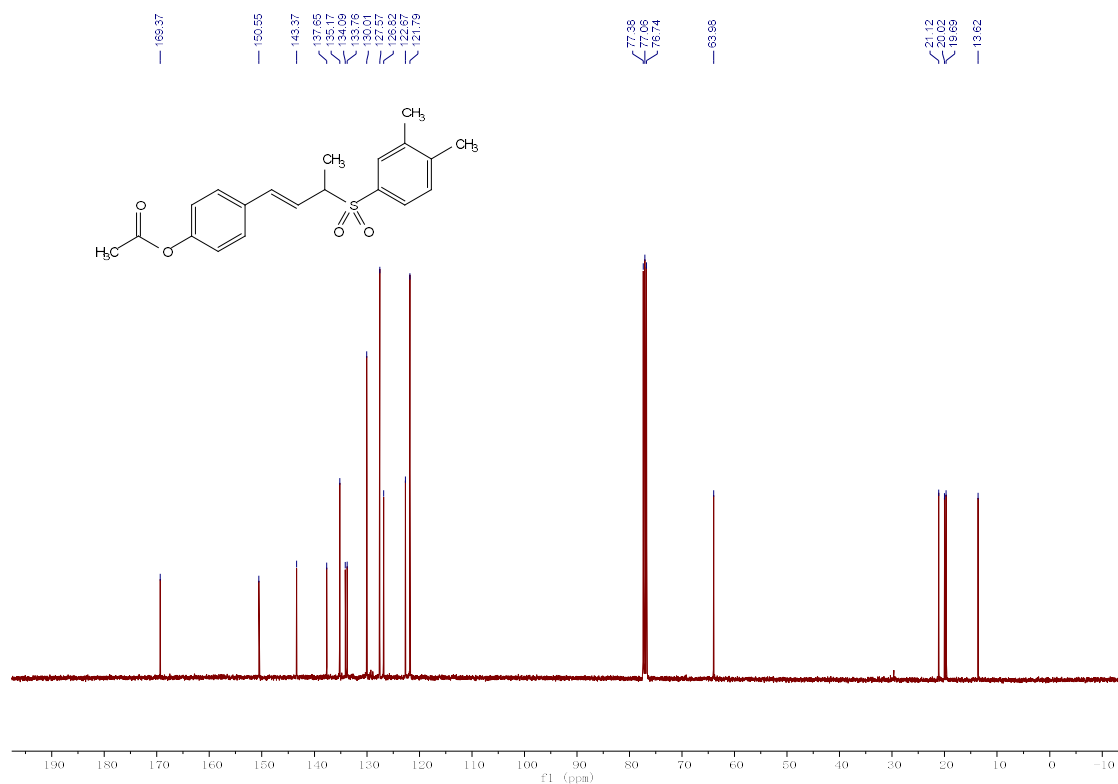

**(E)-N-(4-(3-((4-(prop-1-en-2-yl)phenyl)sulfonyl)but-1-en-1-yl)phenyl)acetamide (38).**

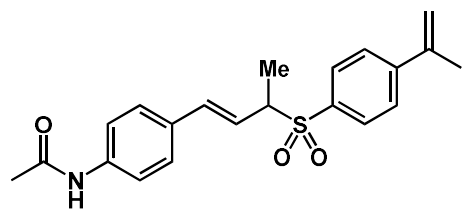

The product (52.5 mg, 71% yield) as brown solid was purified with silica gel chromatography (petroleum ether/ethyl acetate = 2/1). <sup>1</sup>H NMR (400 MHz, CDCl<sub>3</sub>) δ 8.07 (s, 1H), 7.79 (d, *J* = 8.0 Hz, 2H), 7.59 (d, *J* = 8.0 Hz, 2H), 7.52 (d, *J* = 8.0 Hz, 2H), 7.21 (d, *J* = 8.0 Hz, 2H), 6.35 (d, *J* = 16.0 Hz, 1H), 6.01 (dd, *J* = 15.6 Hz, 8.0 Hz, 1H), 5.50 (s, 1H), 5.27 (s, 1H), 3.92-3.84 (m, 1H), 2.17-2.16 (m, 6H), 1.54 (d, *J* = 6.8 Hz, 3H); <sup>13</sup>C NMR (101 MHz, CDCl<sub>3</sub>) δ 168.9, 146.7, 141.7, 138.4, 136.2, 135.3, 131.6, 129.3, 127.3, 125.9, 120.4, 119.9, 116.0, 64.2, 24.5, 21.5, 13.8; HRMS Calculated for C<sub>21</sub>H<sub>23</sub>NO<sub>3</sub>S (M+Na<sup>+</sup>): 392.1291; Found: 392.1290.

**<sup>1</sup>H NMR spectrum (400 MHz, CDCl<sub>3</sub>) of compound 38**

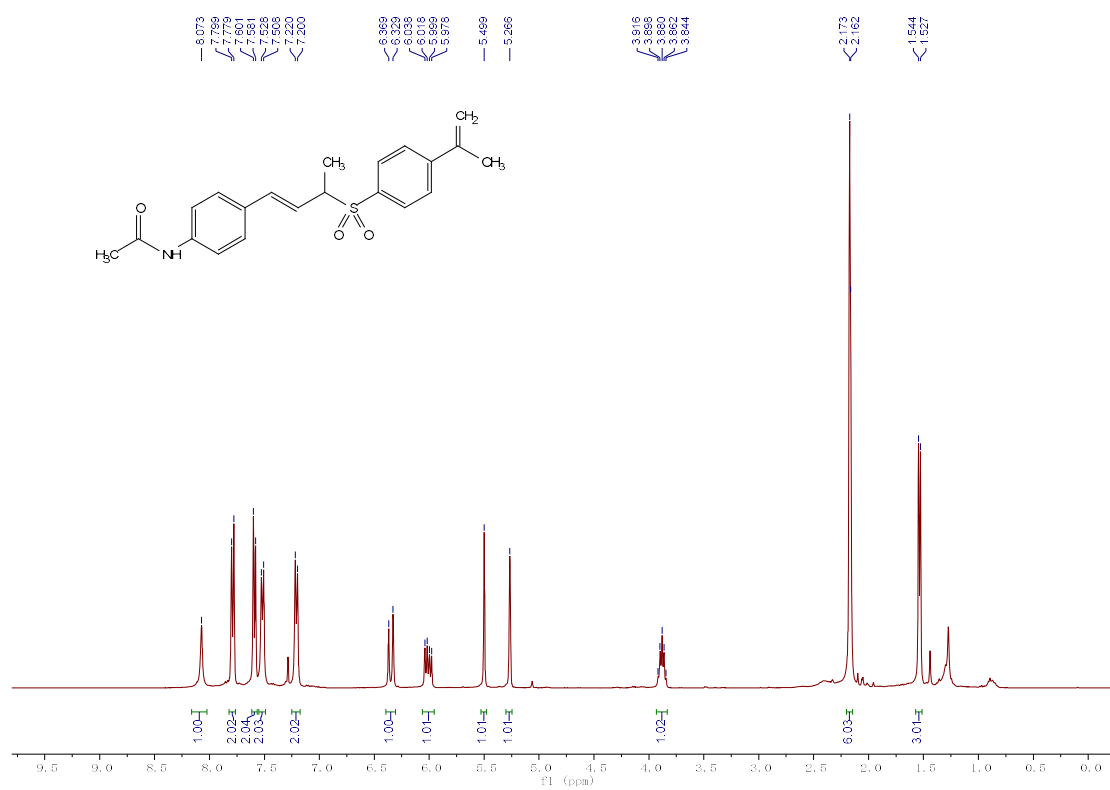

**<sup>13</sup>C NMR spectrum (101 MHz, CDCl<sub>3</sub>) of compound 38**

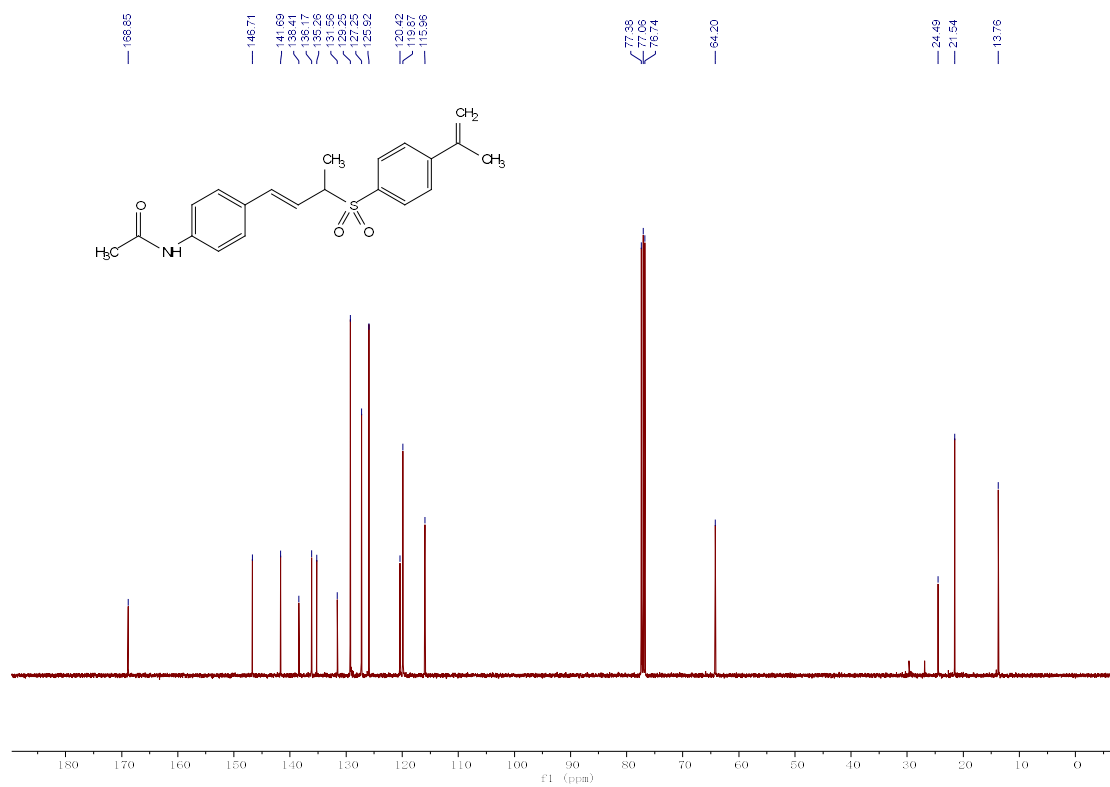



**(E)-N,N-diphenyl-4-((4-(thiophen-2-yl)but-3-en-2-yl)sulfonyl)aniline (39).**

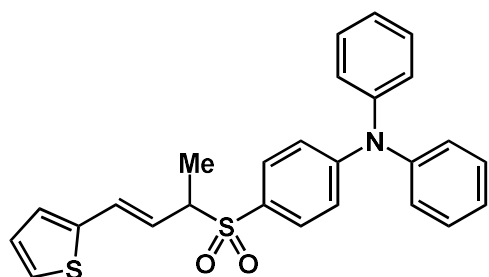

The product (70.4 mg, 79% yield) as yellow oil was purified with silica gel chromatography (petroleum ether/ethyl acetate = 5/1).  $^1\text{H NMR}$  (400 MHz,  $\text{CDCl}_3$ )  $\delta$  7.49 (d,  $J = 8.8$  Hz, 2H), 7.25-7.17 (m, 5H), 7.08-7.02 (m, 8H), 6.89 (d,  $J = 8.4$  Hz, 2H), 6.31 (d,  $J = 16.0$  Hz, 1H), 5.87 (dd,  $J = 16.0$  Hz, 8.4 Hz, 1H), 3.75-3.67 (m, 1H), 1.44 (d,  $J = 6.8$  Hz, 3H);  $^{13}\text{C NMR}$  (101 MHz,  $\text{CDCl}_3$ )  $\delta$  152.5, 146.0, 138.7, 130.6, 130.2, 129.8, 127.2, 126.3, 126.1, 125.1, 124.8, 123.3, 122.3, 119.0, 64.3, 13.7; HRMS Calculated for  $\text{C}_{26}\text{H}_{23}\text{NO}_2\text{S}_2$  ( $\text{M}+\text{Na}^+$ ): 468.1062; Found: 468.1064.

**$^1\text{H NMR}$  spectrum (400 MHz,  $\text{CDCl}_3$ ) of compound 39**

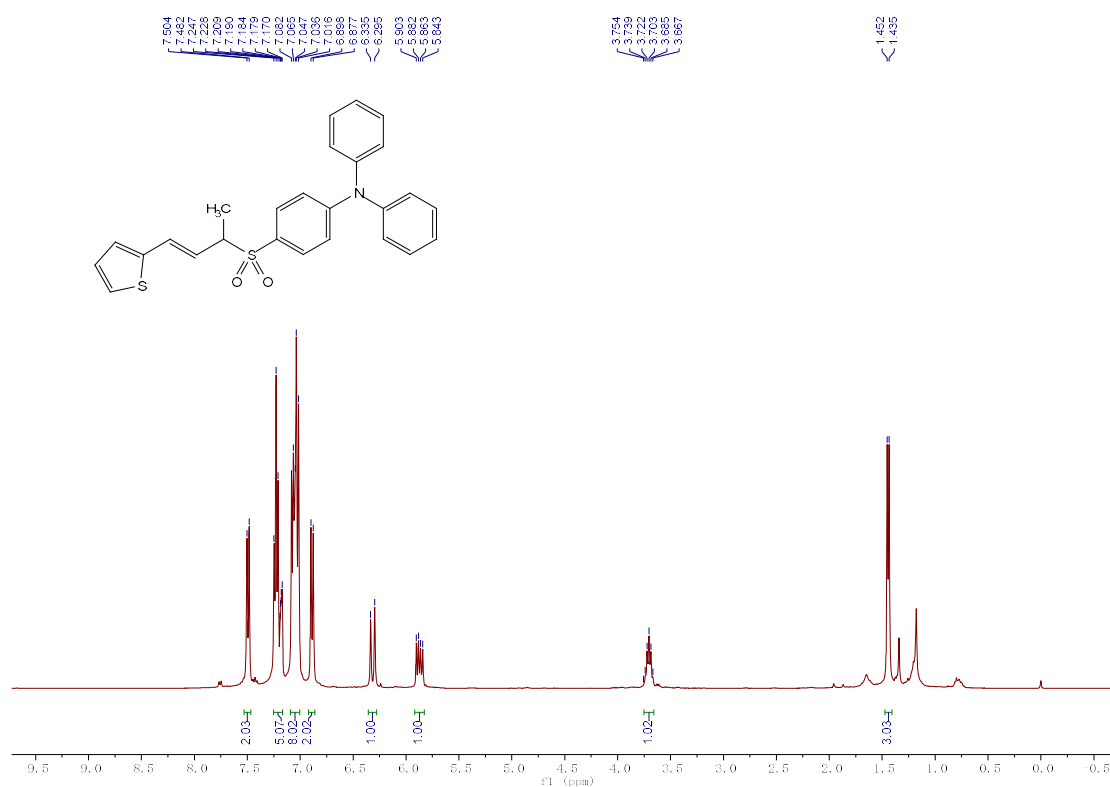

<sup>13</sup>C NMR spectrum (101 MHz, CDCl<sub>3</sub>) of compound **39**

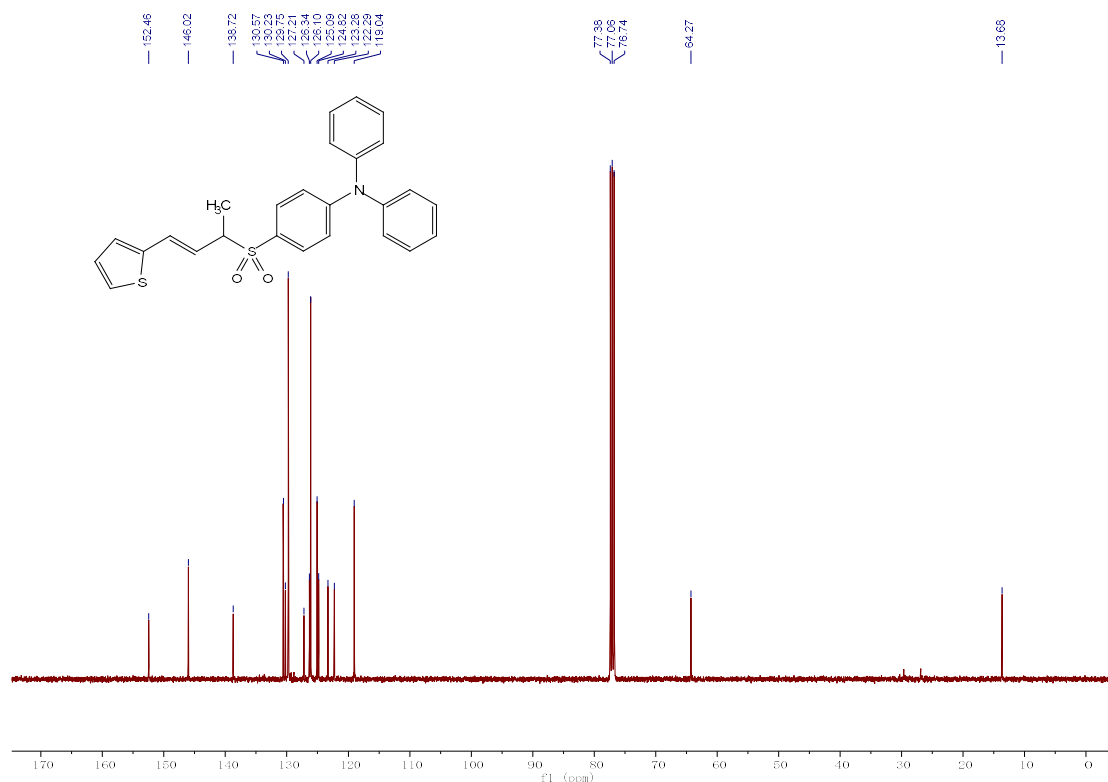

**(E)-9-(4-((4-(benzo[*b*]thiophen-2-yl)but-3-en-2-yl)sulfonyl)phenyl)-9H-carbazole (40).**

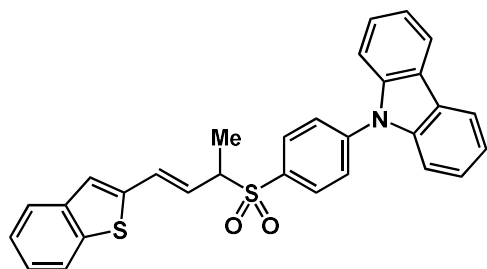

The product (64.2 mg, 65% yield) as brown oil was purified with silica gel chromatography (petroleum ether/ethyl acetate = 5/1). <sup>1</sup>H NMR (400 MHz, CDCl<sub>3</sub>) δ 8.58 (s, 1H), 8.03 (d, *J* = 7.6 Hz, 1H), 7.75 (d, *J* = 8.4 Hz, 1H), 7.66-7.62 (m, 1H), 7.55-7.51 (m, 3H), 7.44-7.40 (m, 3H), 7.38 (d, *J* = 7.2 Hz, 1H), 7.34-7.30 (m, 2H), 7.25-7.19 (m, 3H), 6.96 (s, 1H), 6.54 (d, *J* = 15.6 Hz, 1H), 5.96 (dd, *J* = 15.6 Hz, 8.0 Hz, 1H), 3.91-3.84 (m, 1H), 1.50 (d, *J* = 6.8 Hz, 3H); <sup>13</sup>C NMR (101 MHz, CDCl<sub>3</sub>) δ 143.5, 141.9, 141.0, 139.8, 139.1, 136.5, 130.2, 129.8, 128.4, 127.4, 127.3, 127.1, 126.8, 125.1, 124.7, 124.6, 124.1, 123.7, 123.3, 122.8, 122.67, 122.3, 121.3, 120.9, 110.4, 109.7, 64.5, 13.8; HRMS Calculated for C<sub>30</sub>H<sub>23</sub>NO<sub>2</sub>S<sub>2</sub> (M+Na<sup>+</sup>): 516.1062; Found: 516.1064.

<sup>1</sup>H NMR spectrum (400 MHz, CDCl<sub>3</sub>) of compound 40

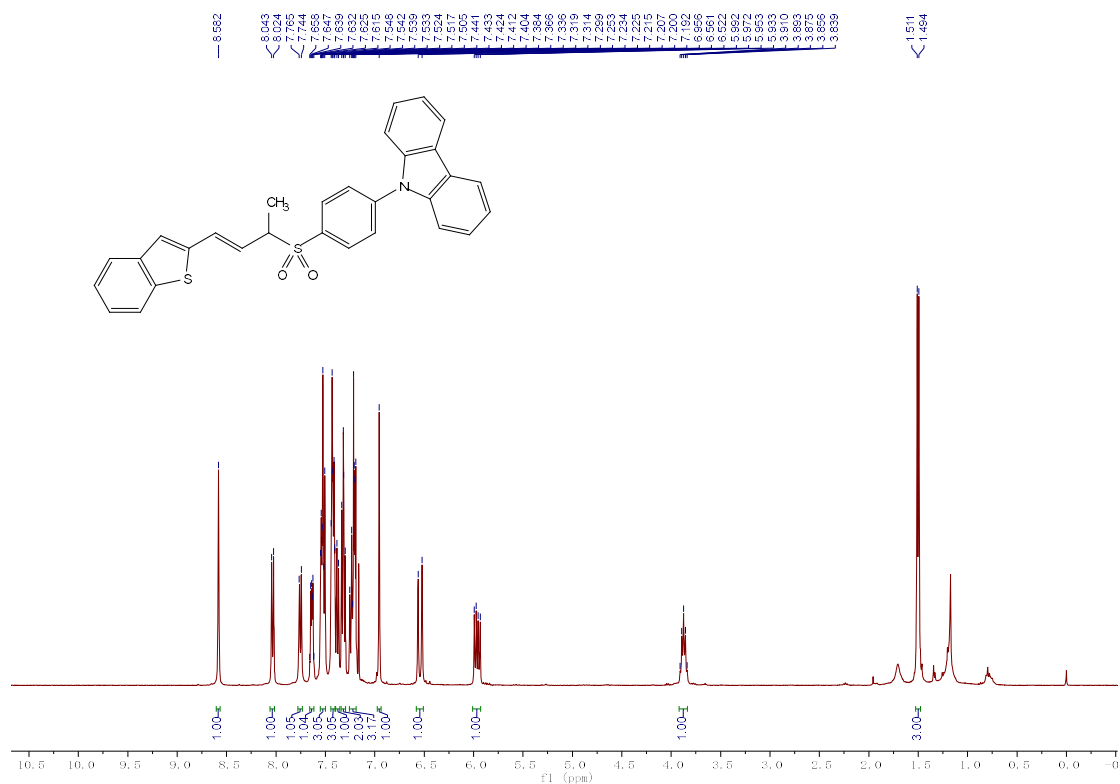

<sup>13</sup>C NMR spectrum (101 MHz, CDCl<sub>3</sub>) of compound 40

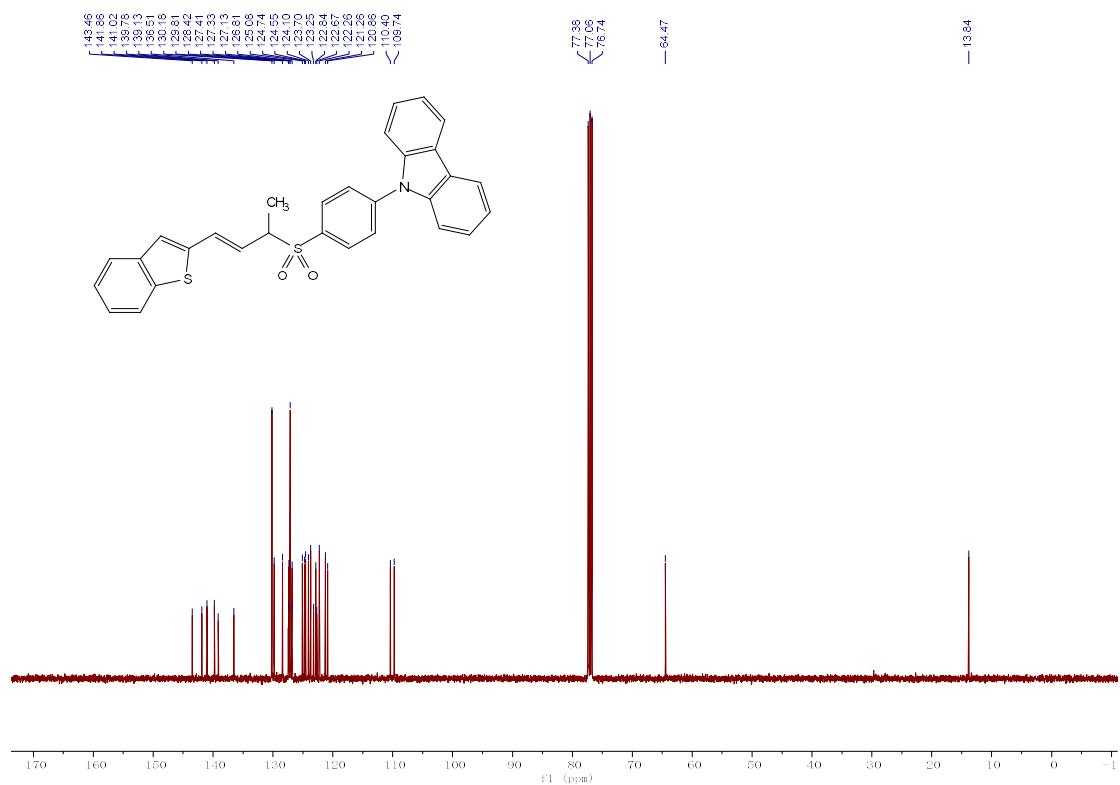

**(E)-6-(3-((4-ethylphenyl)sulfonyl)but-1-en-1-yl)quinoline (41).**

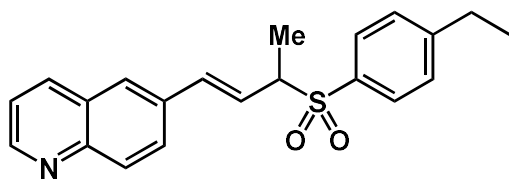

The product (49.2 mg, 70% yield) as yellow solid was purified with silica gel chromatography (petroleum ether/ethyl acetate = 5/1).  $^1\text{H NMR}$  (400 MHz,  $\text{CDCl}_3$ )  $\delta$  8.80-8.78 (m, 1H), 8.02 (d,  $J = 8.4$  Hz, 1H), 7.97 (d,  $J = 8.8$  Hz, 1H), 7.69-7.62 (m, 3H), 7.55 (s, 1H), 7.33-7.30 (m, 1H), 7.24 (d,  $J = 7.6$  Hz, 2H), 6.45 (d,  $J = 16.0$  Hz, 1H), 6.17 (dd,  $J = 16.0$  Hz, 8.4 Hz, 1H), 3.87-3.80 (m, 1H), 2.63 (q,  $J = 7.2$  Hz, 2H), 1.49 (d,  $J = 6.8$  Hz, 3H), 1.16 (t,  $J = 7.2$  Hz, 3H);  $^{13}\text{C NMR}$  (101 MHz,  $\text{CDCl}_3$ )  $\delta$  150.9, 150.4, 148.0, 136.3, 135.6, 134.15, 134.12, 129.7, 129.4, 128.4, 128.3, 127.2, 126.3, 123.9, 121.6, 64.1, 28.8, 15.1, 13.7; HRMS Calculated for  $\text{C}_{17}\text{H}_{19}\text{NO}_4\text{S}$  ( $\text{M}+\text{H}^+$ ): 352.1366; Found: 352.1368.

$^1\text{H NMR}$  spectrum (400 MHz,  $\text{CDCl}_3$ ) of compound 41

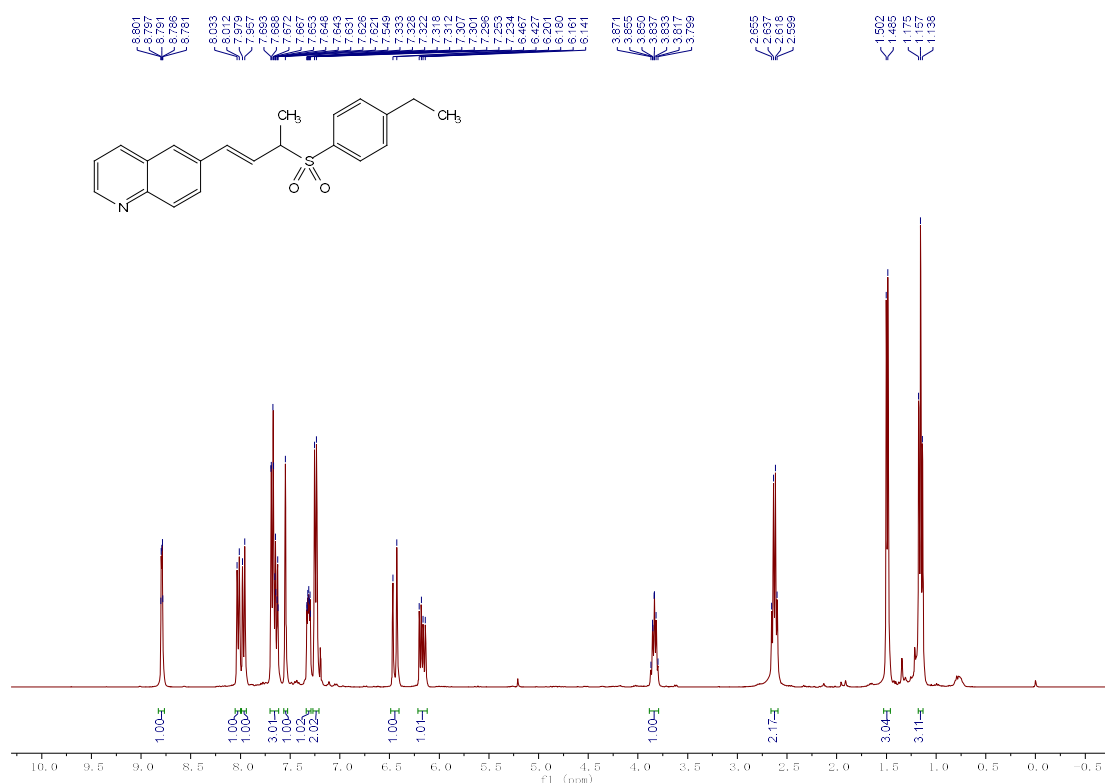

<sup>13</sup>C NMR spectrum (101 MHz, CDCl<sub>3</sub>) of compound 41

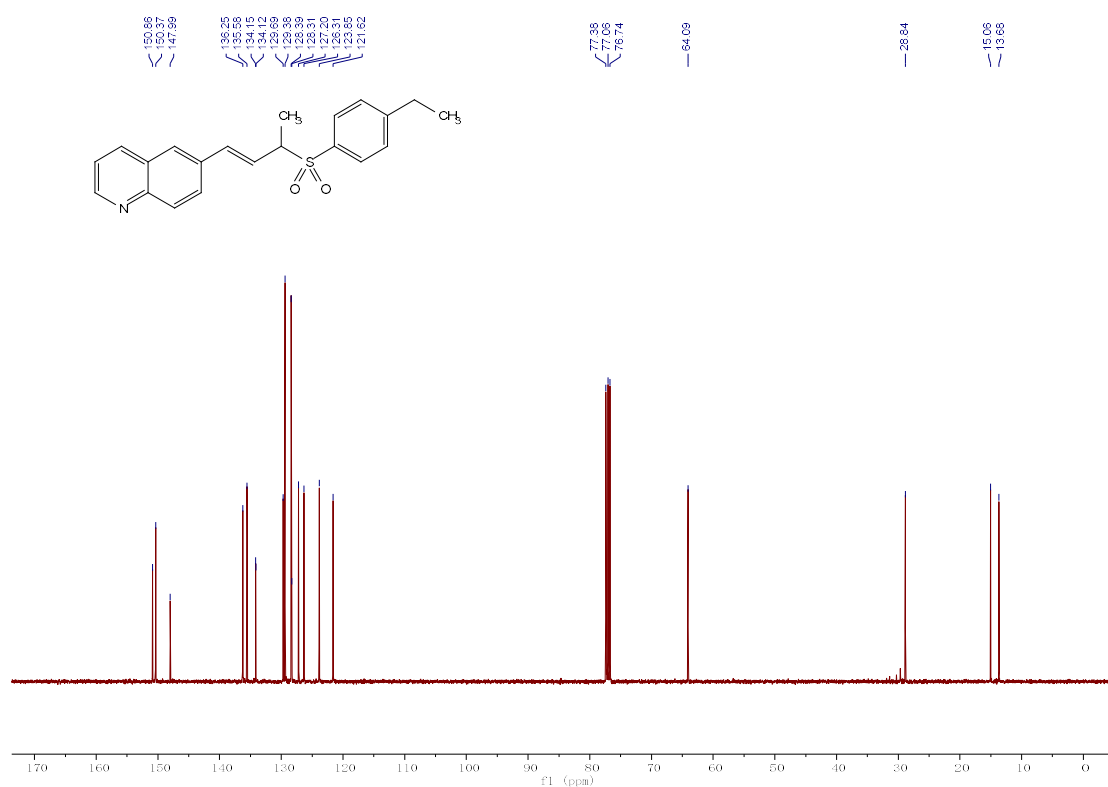

**(E)-2-(3-((2,3-dihydrobenzofuran-5-yl)sulfonyl)but-1-en-1-yl)benzofuran (42).**

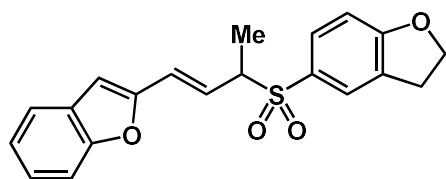

The product (36.9 mg, 52% yield) as yellow solid was purified with silica gel chromatography (petroleum ether/ethyl acetate = 5/1). <sup>1</sup>H NMR (400 MHz, CDCl<sub>3</sub>) δ 7.57 – 7.53 (m, 2H), 7.43 (d, *J* = 7.6 Hz, 1H), 7.35 (d, *J* = 8.4 Hz, 1H), 7.23 – 7.18 (m, 1H), 7.12 (t, *J* = 7.2 Hz, 1H), 6.76 (d, *J* = 8.4 Hz, 1H), 6.49 (s, 1H), 6.26 – 6.25 (m, 2H), 4.58 (t, *J* = 8.8 Hz, 2H), 3.81 – 3.74 (m, 1H), 3.12 (t, *J* = 8.8 Hz, 2H), 1.46 (d, *J* = 6.8 Hz, 3H); <sup>13</sup>C NMR (101 MHz, CDCl<sub>3</sub>) δ 164.8, 154.9, 153.3, 131.1, 128.6, 128.3, 128.2, 126.5, 125.1, 124.3, 124.2, 123.0, 121.2, 111.1, 109.5, 106.0, 72.4, 64.1, 28.9, 13.7; HRMS Calculated for C<sub>20</sub>H<sub>18</sub>O<sub>4</sub>S (M+Na<sup>+</sup>): 377.0818; Found: 377.0817.

<sup>1</sup>H NMR spectrum (400 MHz, CDCl<sub>3</sub>) of compound 42

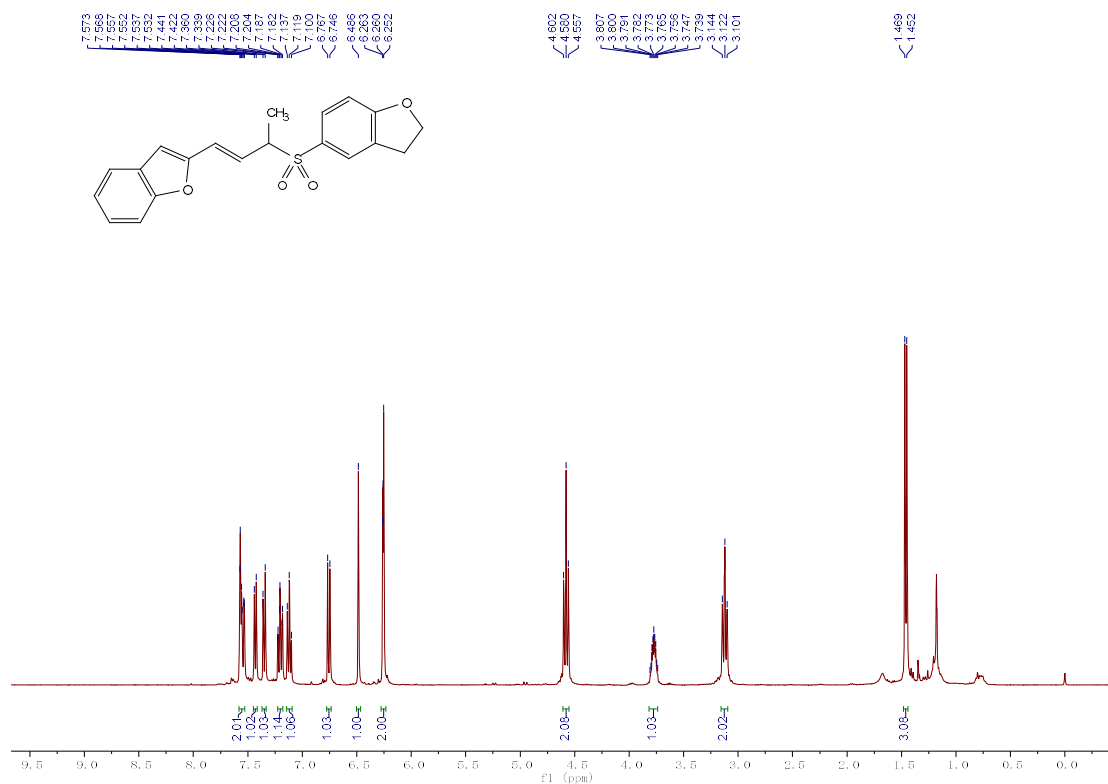

<sup>13</sup>C NMR spectrum (101 MHz, CDCl<sub>3</sub>) of compound 42

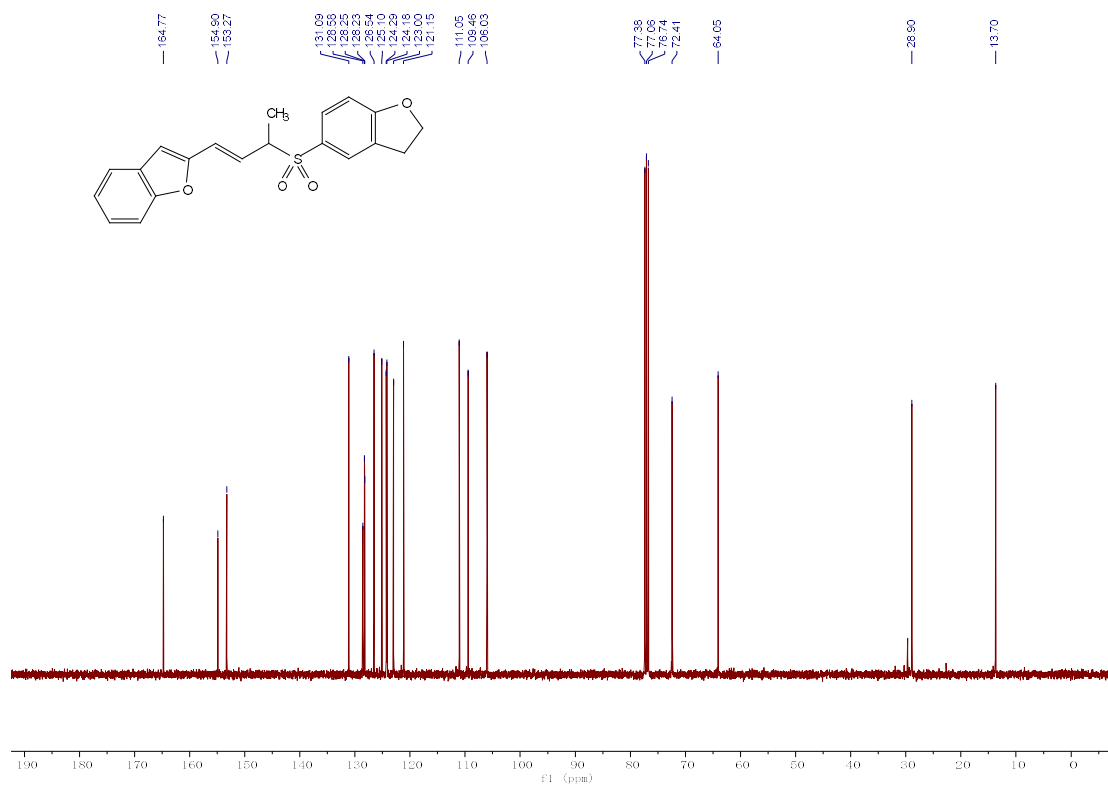

**(E)-5-((4-(6-methoxypyridin-3-yl)but-3-en-2-yl)sulfonyl)-1H-indole (43).**

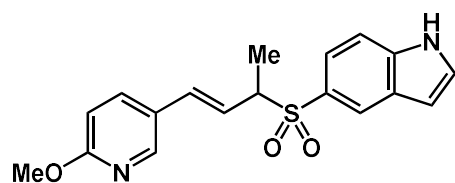

The product (62.3 mg, 91% yield) as white solid was purified with silica gel chromatography (petroleum ether/ethyl acetate = 1/1).  $^1\text{H NMR}$  (400 MHz,  $\text{CDCl}_3$ )  $\delta$  9.15 (s, 1H), 8.09 (s, 1H), 7.86 (s, 1H), 7.53 (d,  $J = 8.4$  Hz, 1H), 7.48 (d,  $J = 8.4$  Hz, 1H), 7.39 (d,  $J = 8.4$  Hz, 1H), 7.27 (s, 1H), 6.64 (d,  $J = 8.4$  Hz, 1H), 6.55 (s, 1H), 6.19 (d,  $J = 16.0$  Hz, 1H), 5.93 (dd,  $J = 16.0$  Hz, 8.4 Hz, 1H), 3.87 (s, 3H), 3.83-3.78 (m, 1H), 1.44 (d,  $J = 6.8$  Hz, 3H);  $^{13}\text{C NMR}$  (101 MHz,  $\text{CDCl}_3$ )  $\delta$  163.3, 144.4, 138.4, 136.8, 131.7, 127.4, 127.0, 125.7, 123.4, 122.7, 122.0, 111.5, 111.2, 103.9, 64.3, 54.4, 14.0; HRMS Calculated for  $\text{C}_{18}\text{H}_{18}\text{N}_2\text{O}_3\text{S}$  ( $\text{M}+\text{H}^+$ ): 343.1111; Found: 343.1112.

$^1\text{H NMR}$  spectrum (400 MHz,  $\text{CDCl}_3$ ) of compound 43

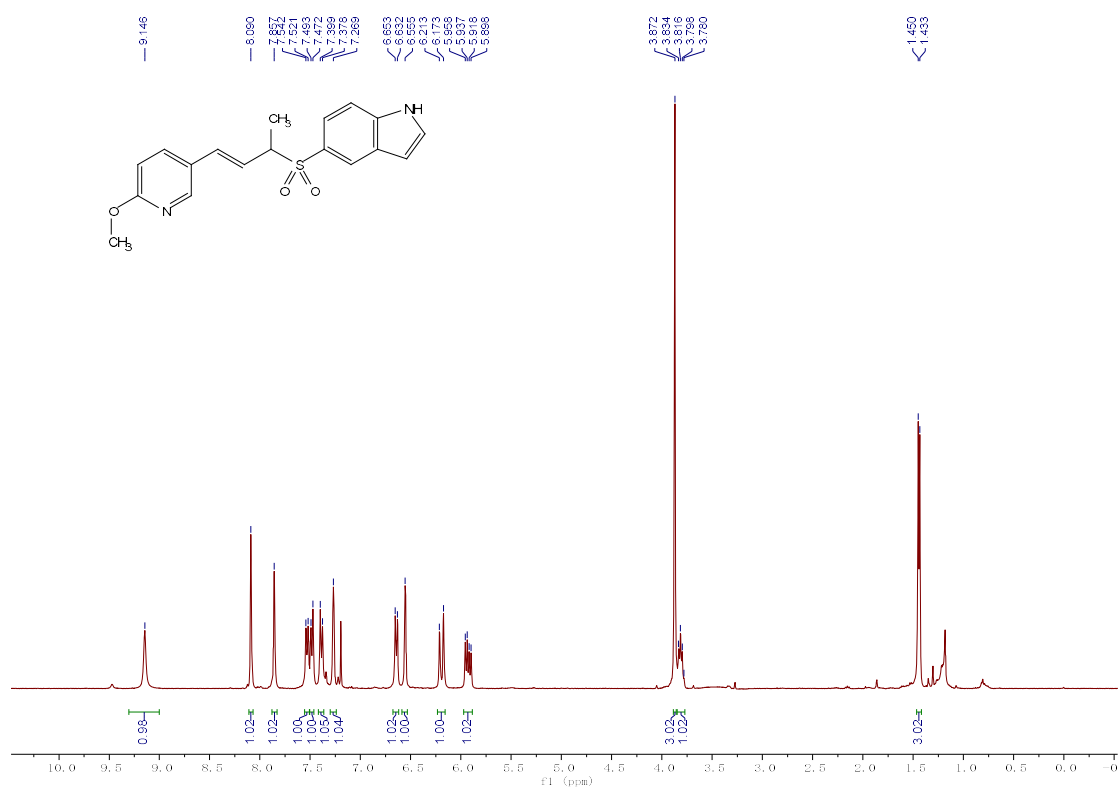

<sup>13</sup>C NMR spectrum (101 MHz, CDCl<sub>3</sub>) of compound **43**

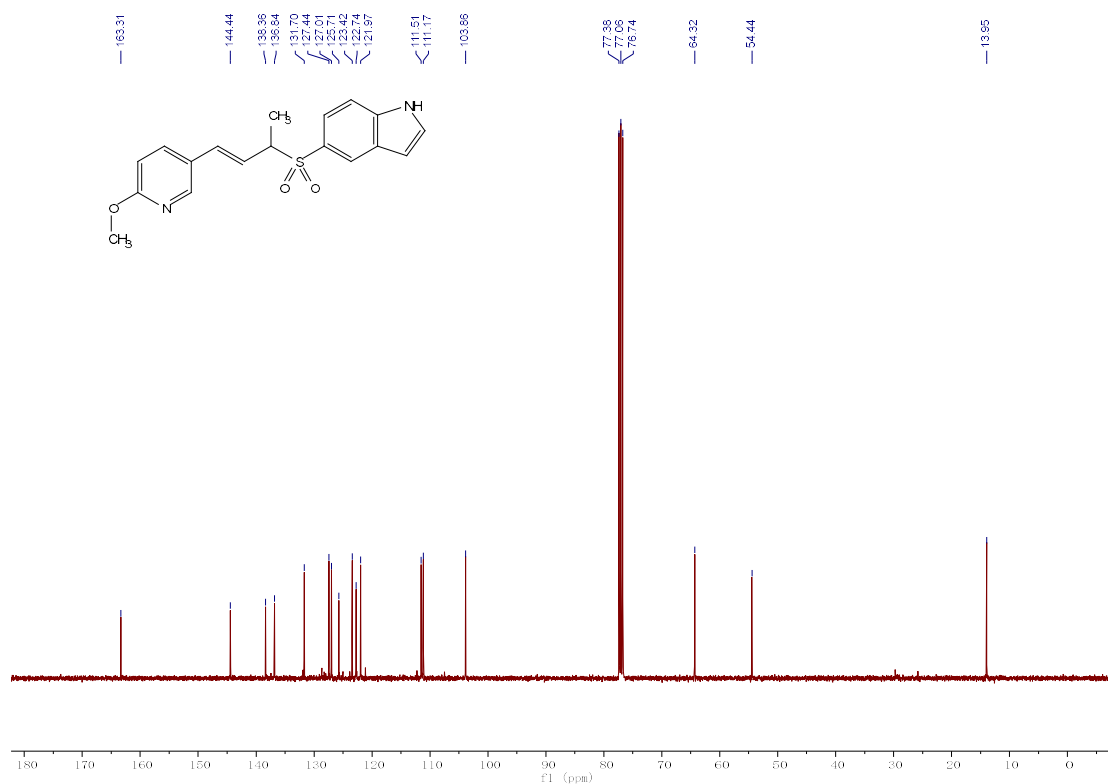

**1-(cinnamylsulfonyl)-4-((1*s*,4*r*)-4-propylcyclohexyl)benzene (44).**

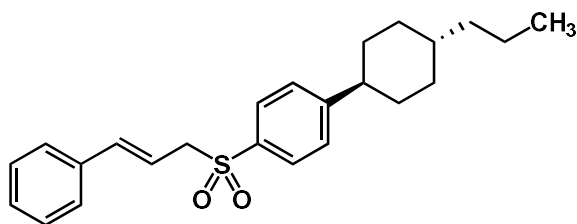

The product (55.9 mg, 73% yield) as yellow solid was purified with silica gel chromatography (petroleum ether/ethyl acetate = 10/1). <sup>1</sup>H NMR (400 MHz, CDCl<sub>3</sub>) δ 7.70 (d, *J* = 8.0 Hz, 2H), 7.27 (d, *J* = 8.4 Hz, 2H), 7.23-7.18 (m, 5H), 6.30 (d, *J* = 16.0 Hz, 1H), 6.07-5.99 (m, 1H), 3.85 (d, *J* = 7.6 Hz, 2H), 2.46 (t, *J* = 12.4 Hz, 1H), 1.83-1.77 (m, 4H), 1.41-1.32 (m, 2H), 1.30-1.11 (m, 5H), 1.02-0.92 (m, 2H), 0.82 (t, *J* = 7.2 Hz, 3H); <sup>13</sup>C NMR (101 MHz, CDCl<sub>3</sub>) δ 154.4, 139.1, 135.9, 135.8, 128.64, 128.59, 128.5, 127.6, 126.6, 115.3, 60.6, 44.7, 39.6, 36.9, 34.0, 33.3, 20.0, 14.4; HRMS Calculated for C<sub>24</sub>H<sub>30</sub>O<sub>2</sub>S (M+Na<sup>+</sup>): 405.1859; Found: 405.1858.



<sup>1</sup>H NMR spectrum (400 MHz, CDCl<sub>3</sub>) of compound 44

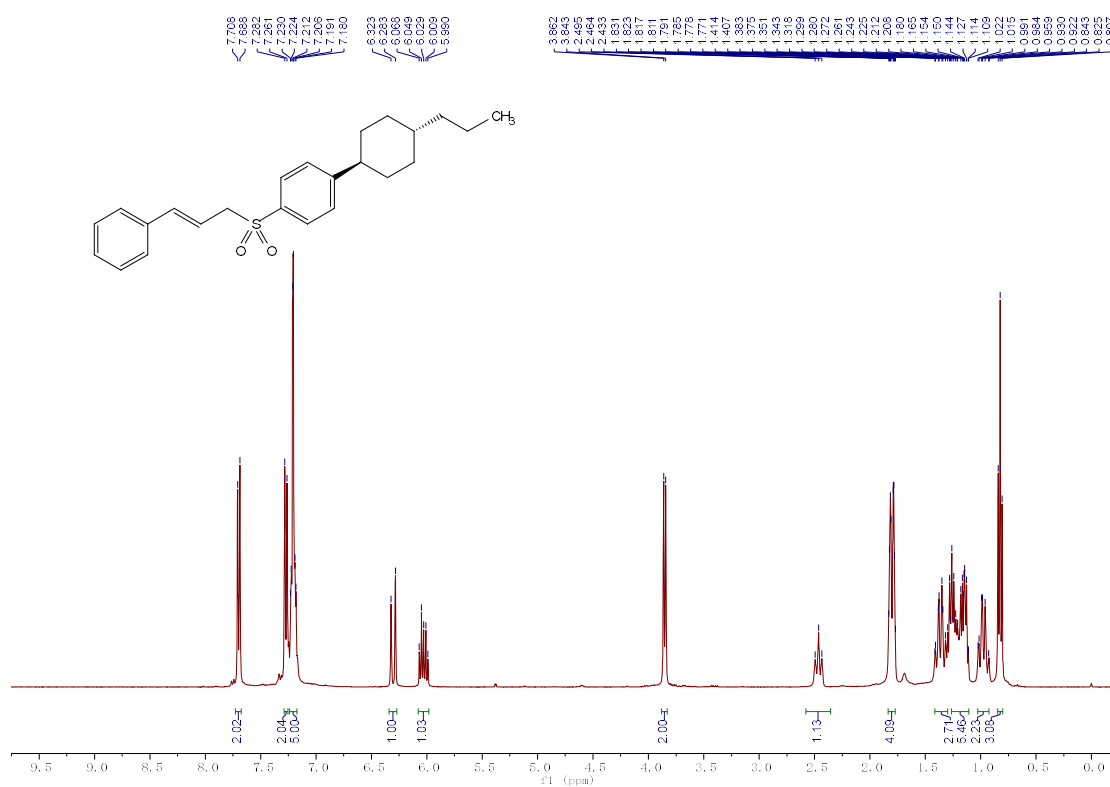

<sup>13</sup>C NMR spectrum (101 MHz, CDCl<sub>3</sub>) of compound 44

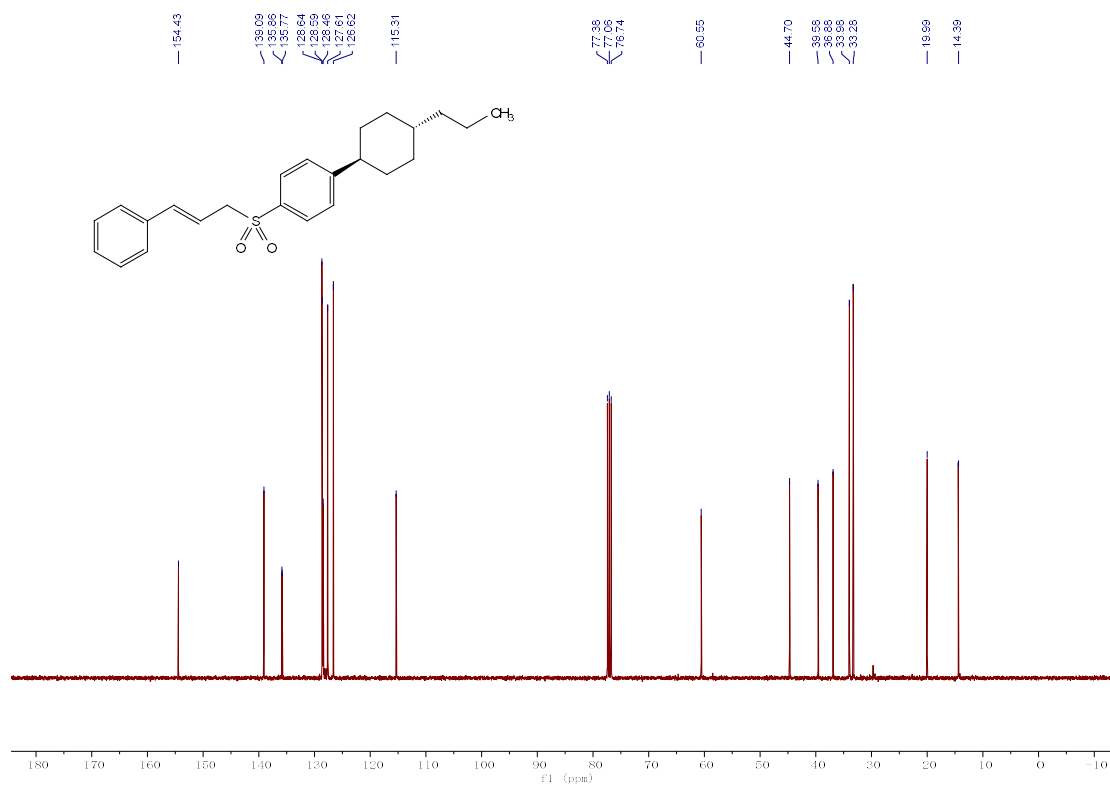



**<sup>13</sup>C NMR spectrum (101 MHz, DMSO-*d*<sub>6</sub>) of compound 45**

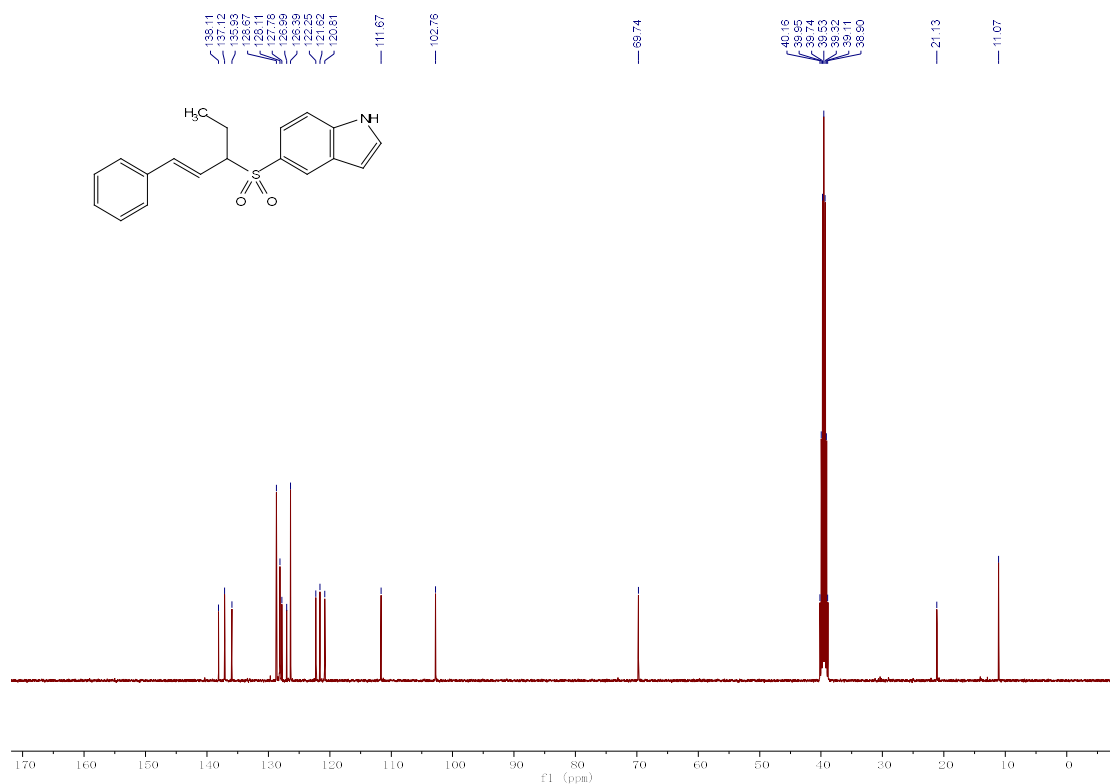

**(*E*)-5-((1-phenylhex-1-en-3-yl)sulfonyl)-1*H*-indole (46).**

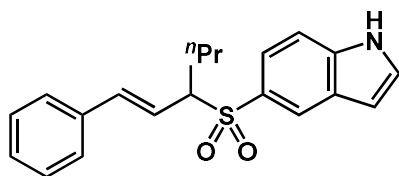

The product (50.2 mg, 74% yield) as pink solid was purified with silica gel chromatography (petroleum ether/ethyl acetate = 2/1). **<sup>1</sup>H NMR (400 MHz, DMSO-*d*<sub>6</sub>)**  $\delta$  11.65 (s, 1H), 8.07 (s, 1H), 7.58-7.54 (m, 2H), 7.50-7.47 (m, 1H), 7.33-7.24 (m, 5H), 6.64 (s, 1H), 6.43 (d,  $J$  = 16.0 Hz, 1H), 5.95 (dd,  $J$  = 15.2 Hz, 8.8 Hz, 1H), 3.97-3.91 (m, 1H), 1.92-1.84 (m, 1H), 1.69-1.59 (m, 1H), 1.39-1.17 (m, 2H), 0.83 (t,  $J$  = 7.2 Hz, 3H); **<sup>13</sup>C NMR (101 MHz, DMSO-*d*<sub>6</sub>)**  $\delta$  138.1, 136.9, 135.9, 128.7, 128.1, 127.7, 127.0, 126.4, 122.3, 121.9, 120.8, 111.7, 102.8, 68.2, 29.6, 19.4, 13.5; **HRMS** Calculated for C<sub>20</sub>H<sub>21</sub>NO<sub>2</sub>S (M+Na<sup>+</sup>): 362.1185; Found: 362.1185.

<sup>1</sup>H NMR spectrum (400 MHz, DMSO-d<sub>6</sub>) of compound 46

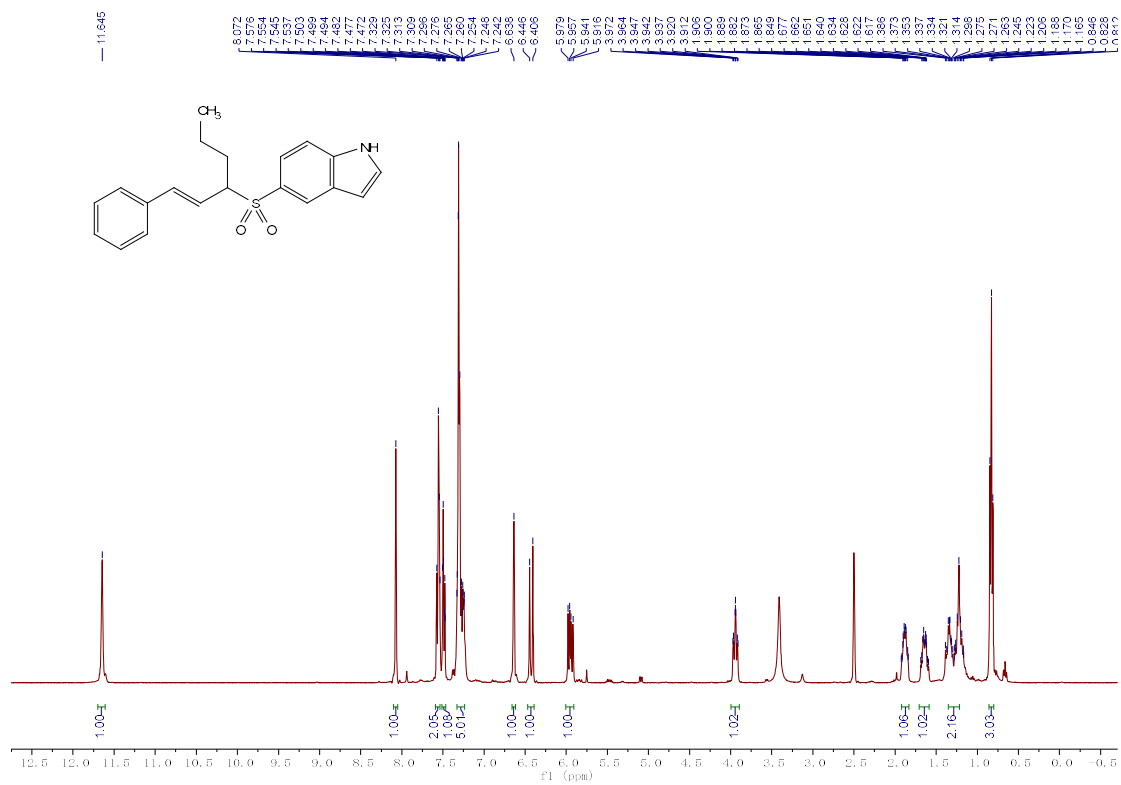

<sup>13</sup>C NMR spectrum (101 MHz, DMSO-d<sub>6</sub>) of compound 46

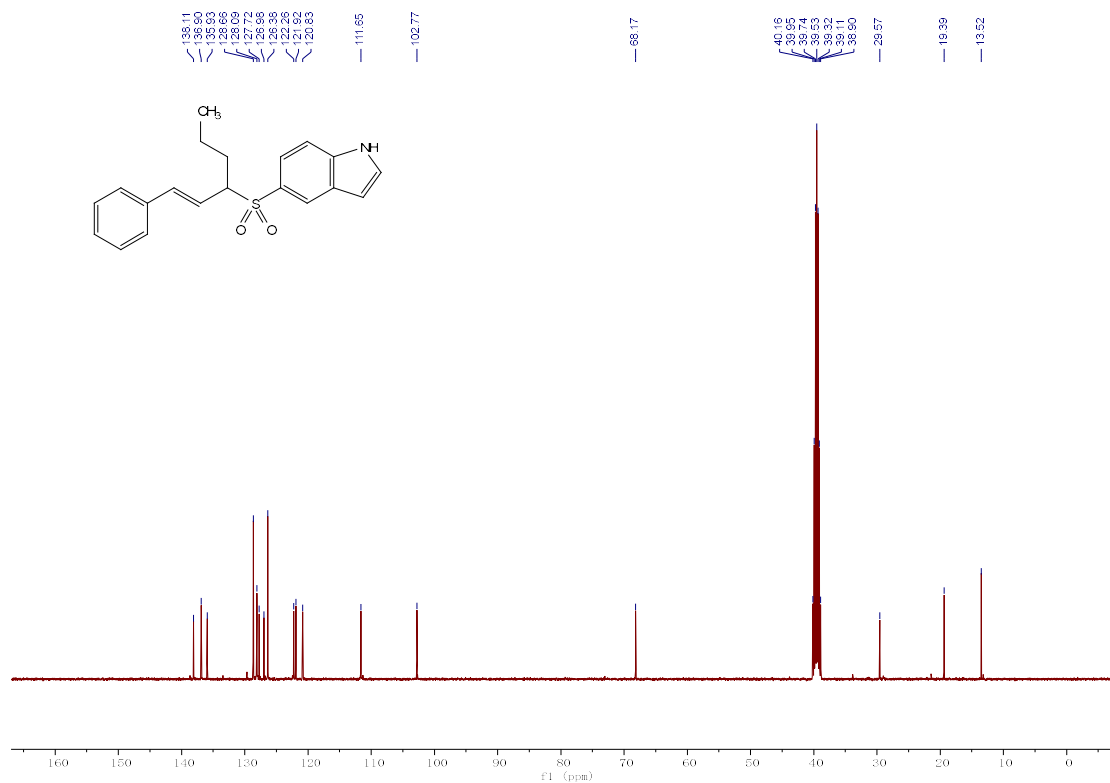

**(E)-5-((5-methyl-1-phenylhex-1-en-3-yl)sulfonyl)-1H-indole (47).**

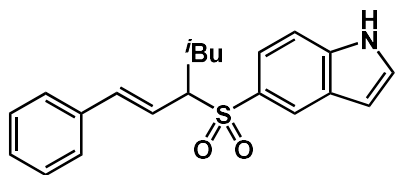

The product (55.1 mg, 78% yield) as pink solid was purified with silica gel chromatography (petroleum ether/ethyl acetate = 2/1). <sup>1</sup>H NMR (400 MHz, DMSO-*d*<sub>6</sub>) δ 11.65 (s, 1H), 8.08 (s, 1H), 7.58-7.54 (m, 2H), 7.51-7.48 (m, 1H), 7.33-7.27 (m, 5H), 6.64 (s, 1H), 6.47 (d, *J* = 15.6 Hz, 1H), 5.94 (dd, *J* = 15.6 Hz, 9.2 Hz, 1H), 4.00-3.94 (m, 1H), 1.72-1.63 (m, 2H), 1.58-1.48 (m, 1H), 0.86 (d, *J* = 6.8 Hz, 3H), 0.78 (d, *J* = 6.4 Hz, 3H); <sup>13</sup>C NMR (101 MHz, DMSO-*d*<sub>6</sub>) δ 138.1, 136.9, 136.0, 128.7, 128.10, 128.07, 127.7, 127.0, 126.4, 122.3, 122.0, 120.9, 111.6, 102.8, 67.1, 36.2, 25.0, 23.5, 20.7; HRMS Calculated for C<sub>21</sub>H<sub>23</sub>NO<sub>2</sub>S (M+Na<sup>+</sup>): 376.1342; Found: 376.1342.

**<sup>1</sup>H NMR spectrum (400 MHz, DMSO-*d*<sub>6</sub>) of compound 47**

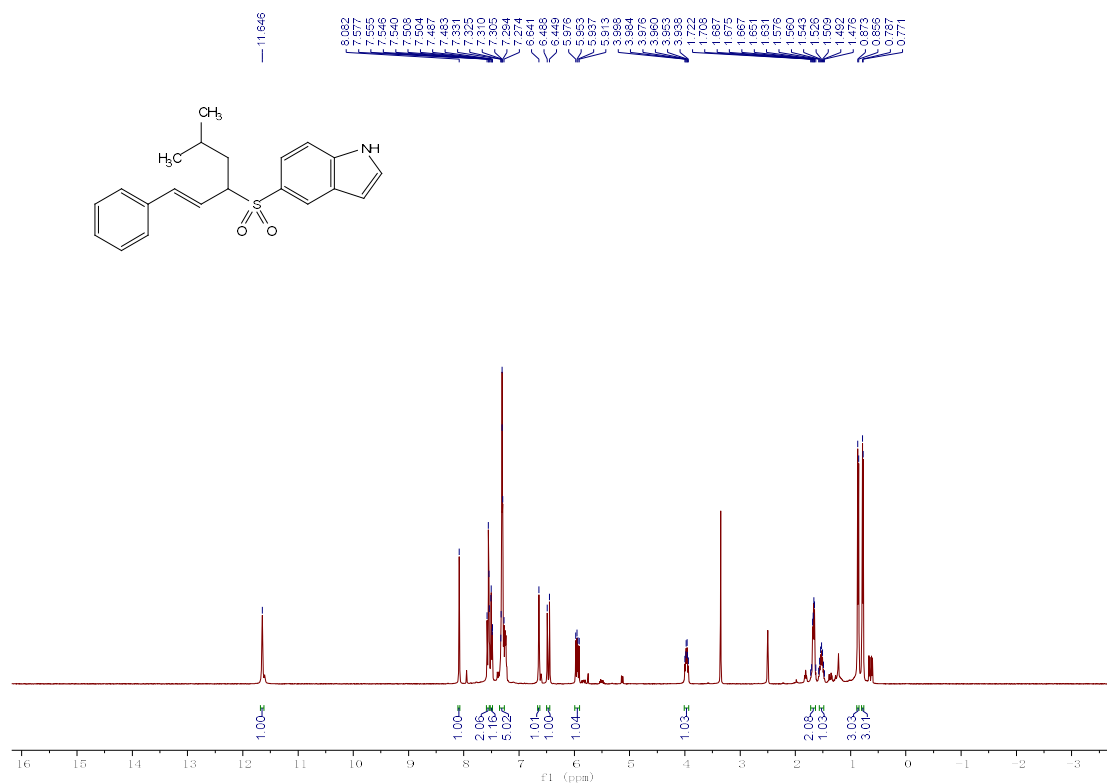

**<sup>13</sup>C NMR spectrum (101 MHz, DMSO-*d*<sub>6</sub>) of compound 47**

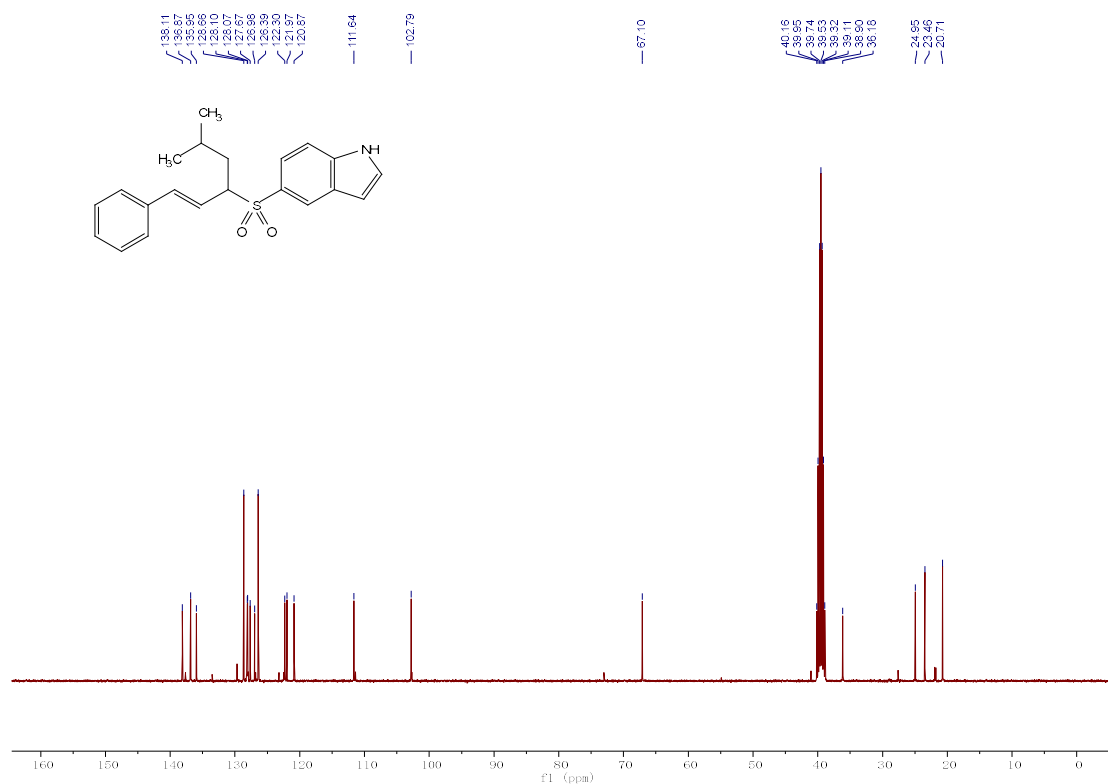

**5-(cinnamylsulfonyl)-1H-indole (51).**

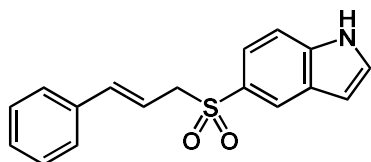

The product (42.8 mg, 72% yield) as white solid was purified with silica gel chromatography (petroleum ether/ethyl acetate = 2/1). **<sup>1</sup>H NMR (400 MHz, DMSO-*d*<sub>6</sub>)**  $\delta$  11.66 (s, 1H), 8.13 (s, 1H), 7.61-7.54 (m, 3H), 7.34-7.23 (m, 5H), 6.65 (s, 1H), 6.49 (d,  $J$  = 16.0 Hz, 1H), 6.14-6.06 (m, 1H), 4.17 (d,  $J$  = 7.2 Hz, 2H); **<sup>13</sup>C NMR (101 MHz, DMSO-*d*<sub>6</sub>)**  $\delta$  138.1, 137.6, 135.9, 129.2, 128.7, 128.2, 127.0, 126.4, 121.5, 120.1, 116.7, 111.9, 102.8, 59.8; **HRMS** Calculated for C<sub>17</sub>H<sub>15</sub>NO<sub>2</sub>S (M+Na<sup>+</sup>): 320.0716; Found: 320.0715.

**<sup>1</sup>H NMR spectrum (400 MHz, DMSO-*d*<sub>6</sub>) of compound 51**

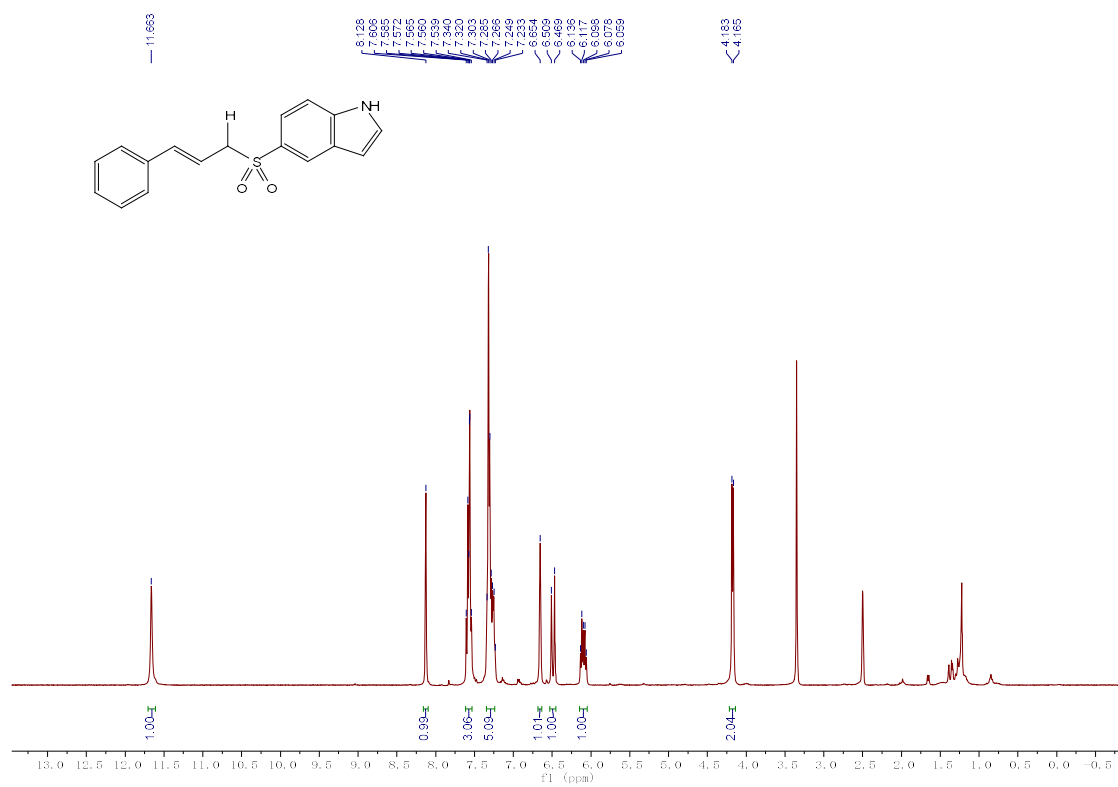

**<sup>13</sup>C NMR spectrum (101 MHz, DMSO-*d*<sub>6</sub>) of compound 51**

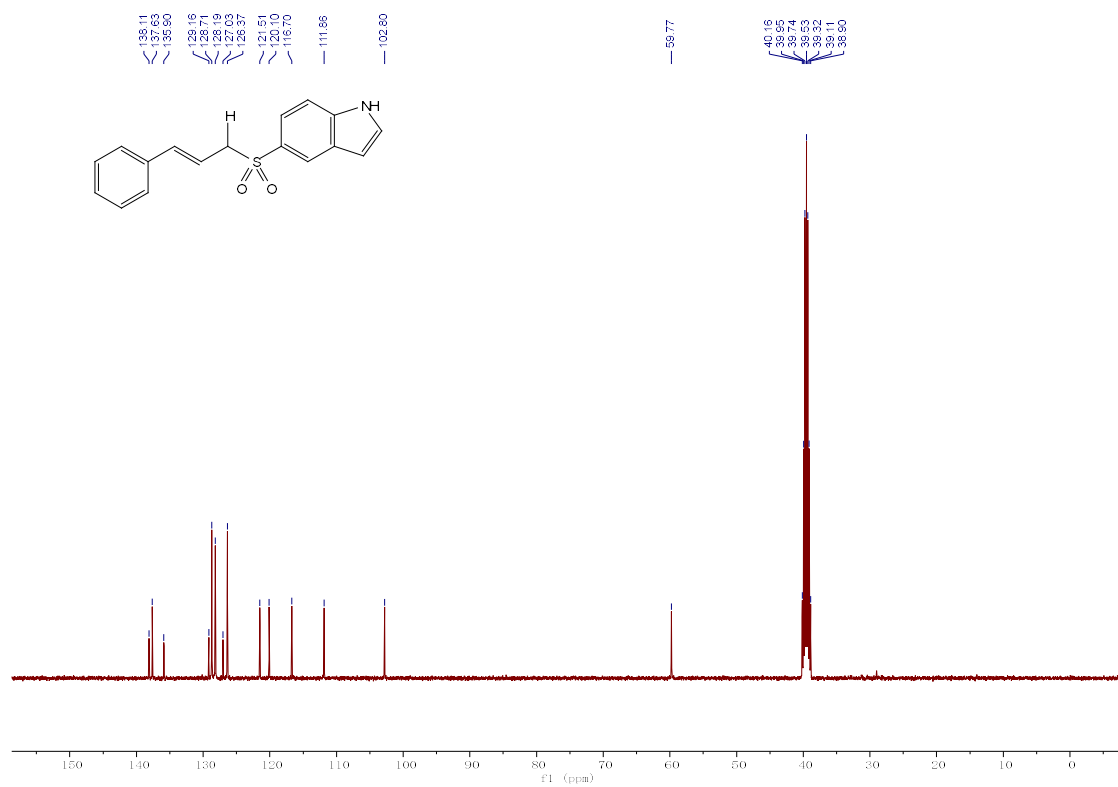

**3-((cinnamylsulfonyl)methyl)-1,3,5-trimethylindolin-2-one (52).**

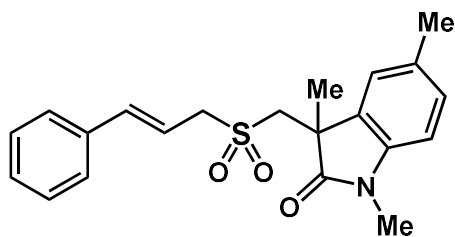

The product (62.8 mg, 85% yield) as white solid was purified with silica gel chromatography (petroleum ether/ethyl acetate = 2/1).  $^1\text{H NMR}$  (400 MHz,  $\text{CDCl}_3$ )  $\delta$  7.34-7.32 (m, 2H), 7.28-7.21 (m, 3H), 7.10 (s, 1H), 7.06 (d,  $J = 7.6$  Hz, 1H), 6.72 (d,  $J = 7.6$  Hz, 1H), 6.57 (d,  $J = 16.0$  Hz, 1H), 6.12-6.04 (m, 1H), 3.62 (dd,  $J = 14.0$  Hz, 7.2 Hz, 1H), 3.57 (d,  $J = 14.8$  Hz, 1H), 3.46-3.40 (m, 2H), 3.16 (s, 3H), 2.30 (s, 3H), 1.35 (s, 3H);  $^{13}\text{C NMR}$  (101 MHz,  $\text{CDCl}_3$ )  $\delta$  177.8, 141.0, 139.0, 135.6, 132.0, 130.5, 129.3, 128.70, 128.65, 126.7, 124.3, 115.3, 108.5, 59.4, 57.0, 45.6, 26.6, 24.9, 21.2; HRMS Calculated for  $\text{C}_{21}\text{H}_{23}\text{NO}_3\text{S}$  ( $\text{M}+\text{H}^+$ ): 370.1471; Found: 370.1472.

$^1\text{H NMR}$  spectrum (400 MHz,  $\text{CDCl}_3$ ) of compound **52**

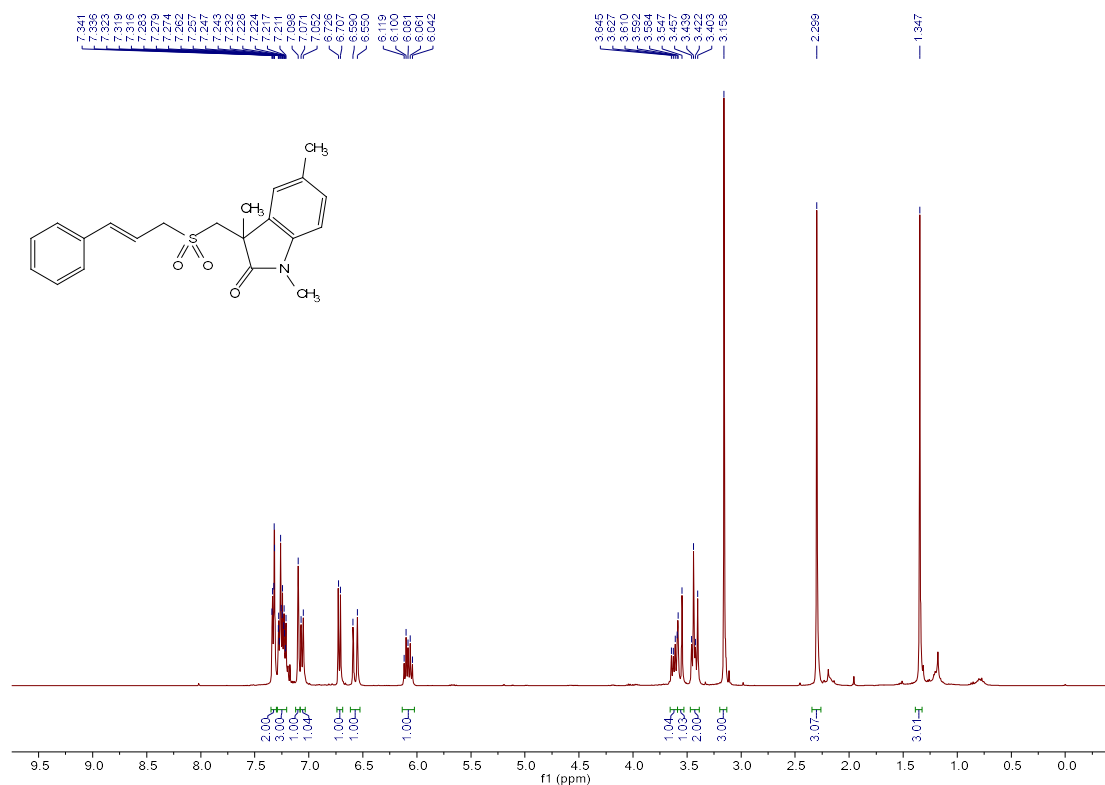



<sup>13</sup>C NMR spectrum (101 MHz, CDCl<sub>3</sub>) of compound **52**

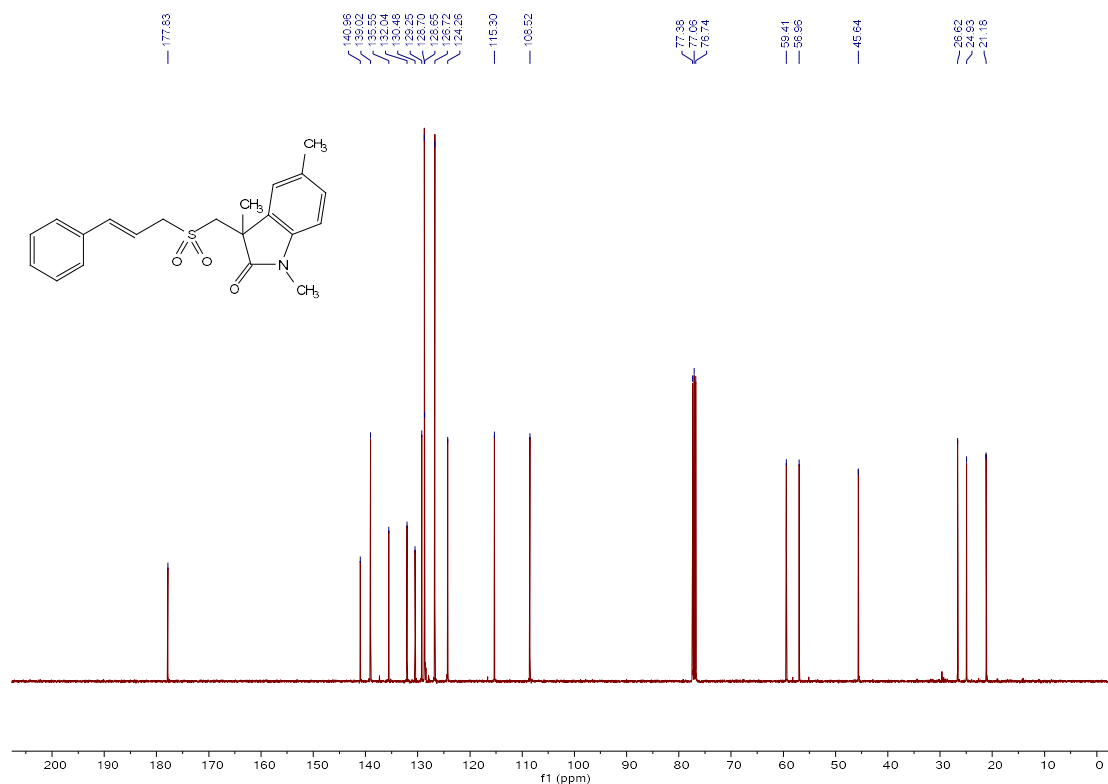

**3-((cinnamylsulfonyl)methyl)-5-methoxy-1,3-dimethylindolin-2-one (53).**

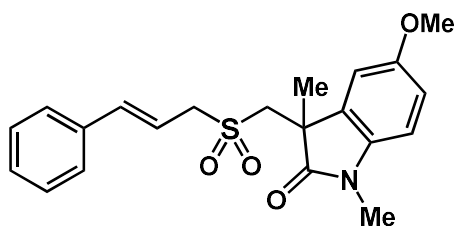

The product (68.6 mg, 89% yield) as light yellow solid was purified with silica gel chromatography (petroleum ether/ethyl acetate = 2/1). <sup>1</sup>H NMR (400 MHz, CDCl<sub>3</sub>) δ 7.35-7.32 (m, 2H), 7.28-7.21 (m, 3H), 6.92 (s, 1H), 6.78 (d, *J* = 8.8 Hz, 1H), 6.73 (d, *J* = 8.4 Hz, 1H), 6.59 (d, *J* = 16.0 Hz, 1H), 6.12-6.05 (m, 1H), 3.73 (s, 3H), 3.64 (dd, *J* = 14.4 Hz, 7.2 Hz, 1H), 3.56 (d, *J* = 14.8 Hz, 1H), 3.45 (dd, *J* = 15.2 Hz, 7.6 Hz, 1H), 3.42 (d, *J* = 14.8 Hz, 1H), 3.16 (s, 3H), 1.36 (s, 3H). <sup>13</sup>C NMR (101 MHz, CDCl<sub>3</sub>) δ 177.5, 156.0, 139.2, 136.7, 135.6, 131.9, 128.7, 126.8, 115.2, 112.8, 111.4, 109.0, 59.5, 56.9, 55.8, 46.0, 26.7, 24.9; HRMS Calculated for C<sub>21</sub>H<sub>23</sub>NO<sub>4</sub>S (M+H<sup>+</sup>): 386.1421; Found: 386.1422.

**<sup>1</sup>H NMR spectrum (400 MHz, CDCl<sub>3</sub>) of compound 53**

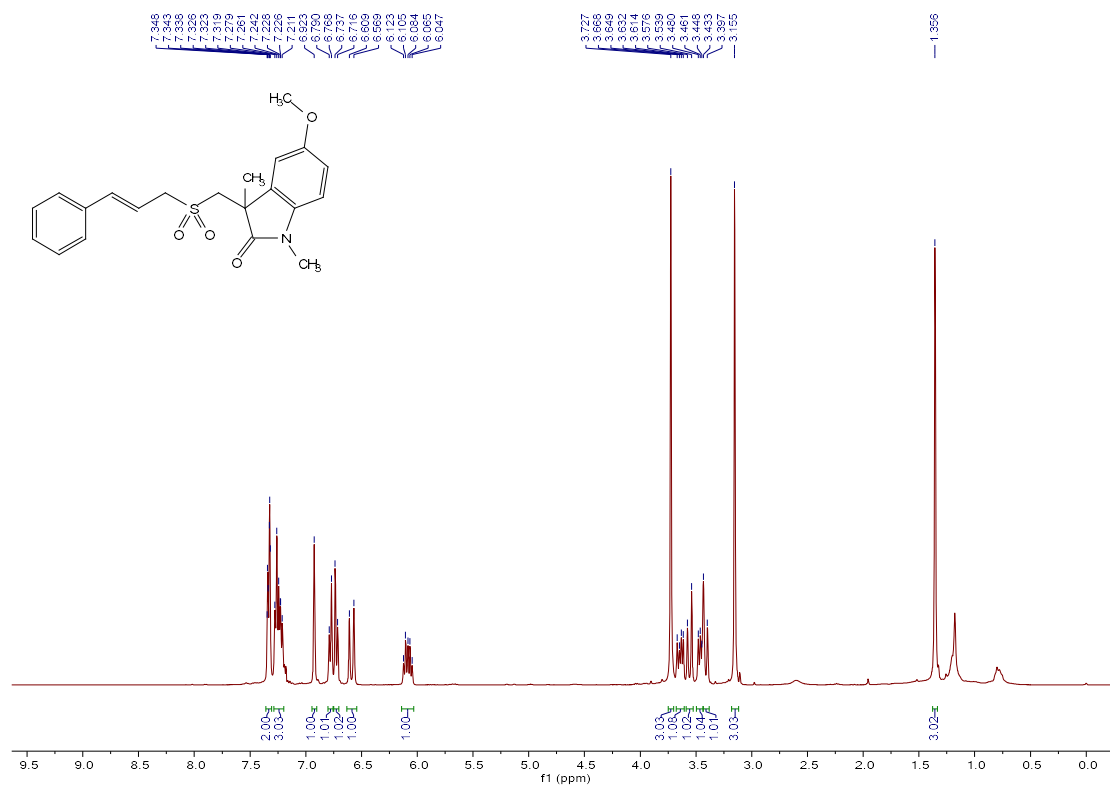

**<sup>13</sup>C NMR spectrum (101 MHz, CDCl<sub>3</sub>) of compound 53**

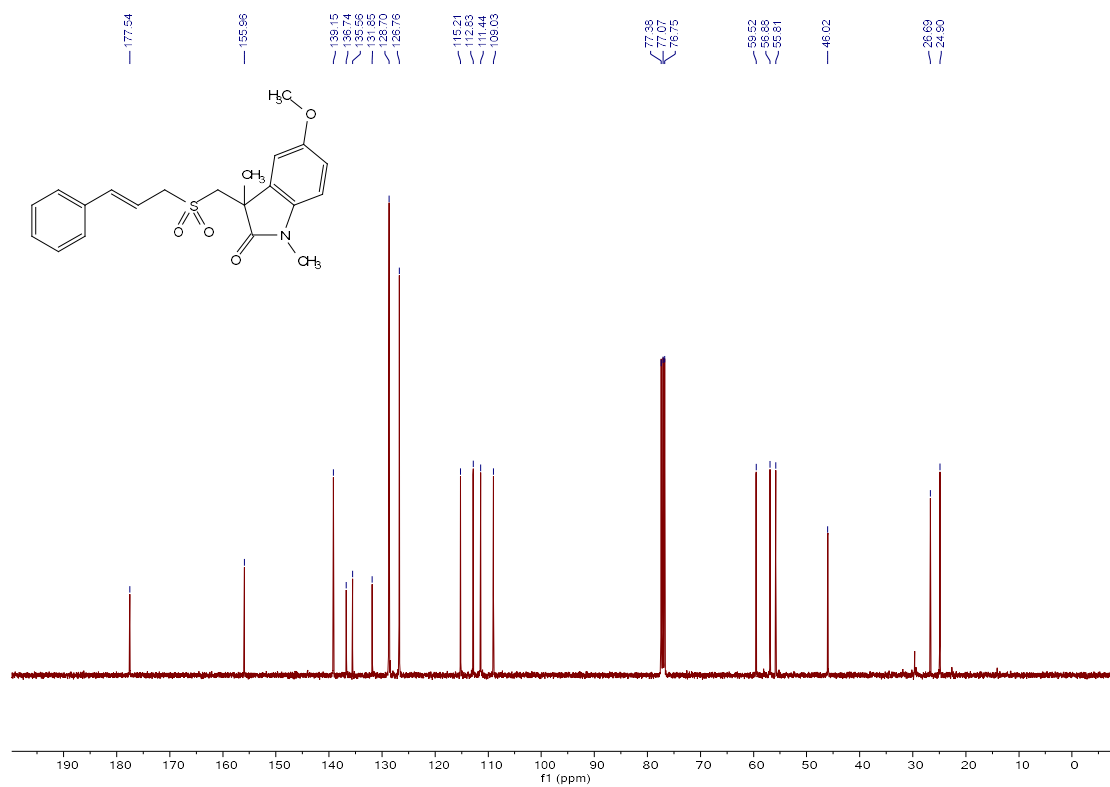

**3-((cinnamylsulfonyl)methyl)-1,3-dimethyl-2-oxindoline-5-carbonitrile (54).**

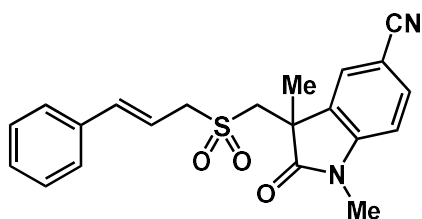

The product (48.7 mg, 64% yield) as white solid was purified with silica gel chromatography (petroleum ether/ethyl acetate = 1/1).  $^1\text{H NMR}$  (400 MHz,  $\text{CDCl}_3$ )  $\delta$  7.66-7.62 (m, 2H), 7.43 (d,  $J$  = 7.2 Hz, 2H), 7.37-7.29 (m, 3H), 6.96 (d,  $J$  = 8.0 Hz, 1H), 6.72 (d,  $J$  = 16.0 Hz, 1H), 6.20-6.13 (m, 1H), 3.78 (dd,  $J$  = 14.0 Hz, 7.6 Hz, 1H), 3.73 (d,  $J$  = 15.2 Hz, 1H), 3.64 (dd,  $J$  = 14.1 Hz, 7.3 Hz, 1H), 3.54 (d,  $J$  = 14.4 Hz, 1H), 3.28 (s, 3H), 1.44 (s, 3H);  $^{13}\text{C NMR}$  (101 MHz,  $\text{CDCl}_3$ )  $\delta$  177.8, 147.2, 139.5, 135.4, 134.2, 131.7, 128.9, 128.8, 127.1, 126.8, 119.0, 114.7, 109.2, 105.8, 59.9, 56.5, 45.2, 26.9, 24.9; **HRMS** Calculated for  $\text{C}_{21}\text{H}_{20}\text{N}_2\text{O}_3\text{S}$  ( $\text{M}+\text{H}^+$ ): 381.1267; Found: 381.1267.

$^1\text{H NMR}$  spectrum (400 MHz,  $\text{CDCl}_3$ ) of compound **54**

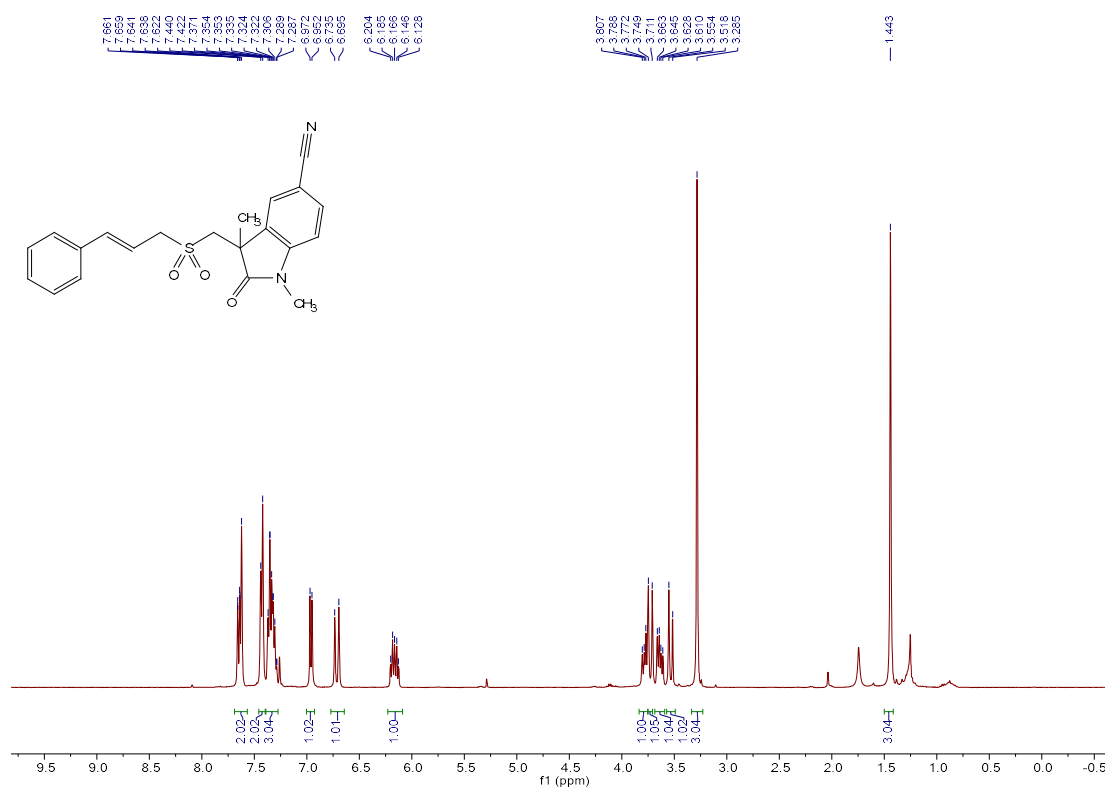

<sup>13</sup>C NMR spectrum (101 MHz, CDCl<sub>3</sub>) of compound **54**

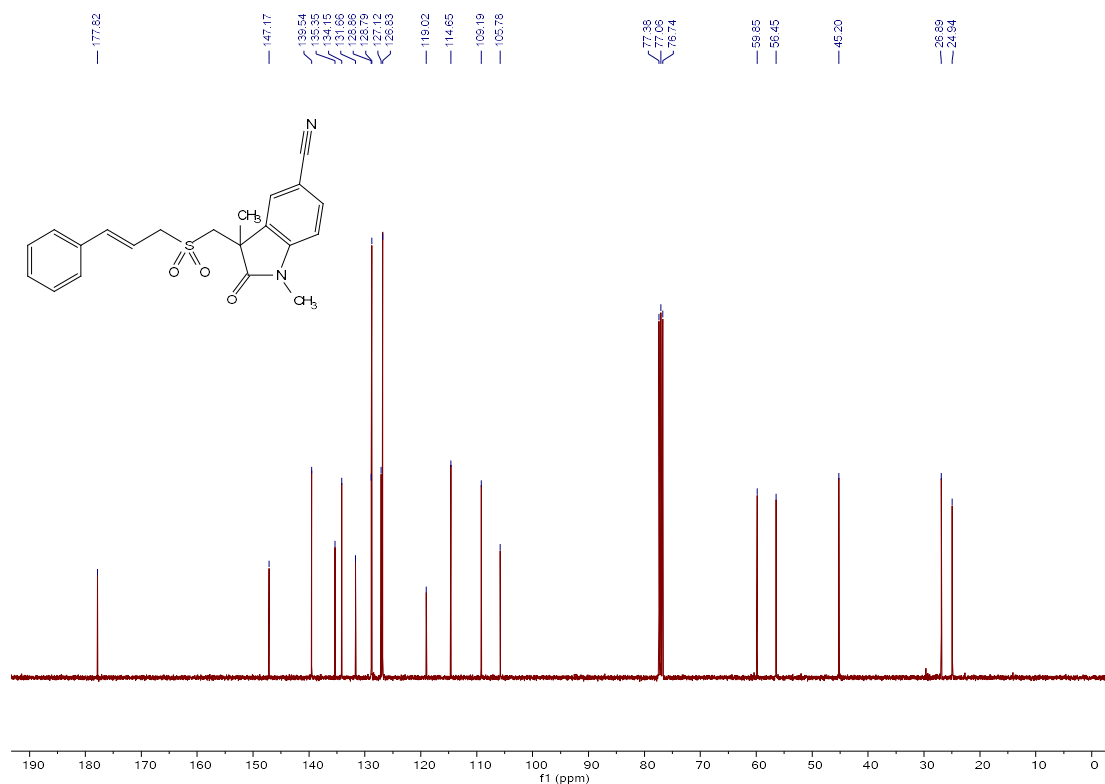

**3-((cinnamylsulfonyl)methyl)-1,3-dimethyl-5-(trifluoromethyl)indolin-2-one (55).**

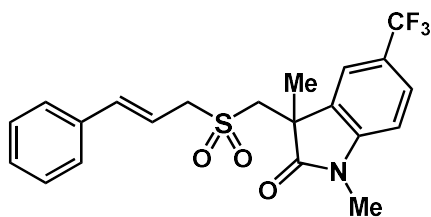

The product (67.8 mg, 80% yield) as white solid was purified with silica gel chromatography (petroleum ether/ethyl acetate = 2/1). <sup>1</sup>H NMR (400 MHz, CDCl<sub>3</sub>) δ 7.56-7.53 (m, 2H), 7.34 (d, *J* = 7.6 Hz, 2H), 7.29-7.22 (m, 3H), 6.90 (d, *J* = 8.0 Hz, 1H), 6.61 (d, *J* = 16.0 Hz, 1H), 6.13-6.05 (m, 1H), 3.68-3.60 (m, 2H), 3.50-3.43 (m, 2H), 3.21 (s, 3H), 1.37 (s, 3H); <sup>19</sup>F NMR (376 MHz, CDCl<sub>3</sub>) δ -61.2 (s, 3F); <sup>13</sup>C NMR (101 MHz, CDCl<sub>3</sub>) δ 178.0, 146.4, 139.3, 135.4, 131.1, 128.81, 128.77, 126.8-126.7 (m, 2C), 124.8 (q, *J* = 33.3 Hz), 124.3 (q, *J* = 272.7 Hz), 120.7 (q, *J* = 4.0 Hz), 115.0, 108.6, 60.0, 56.6, 45.5, 26.9, 24.9; HRMS Calculated for C<sub>21</sub>H<sub>20</sub>F<sub>3</sub>NO<sub>3</sub>S (M+H<sup>+</sup>): 424.1189; Found: 424.1190.

<sup>1</sup>H NMR spectrum (400 MHz, CDCl<sub>3</sub>) of compound **55**

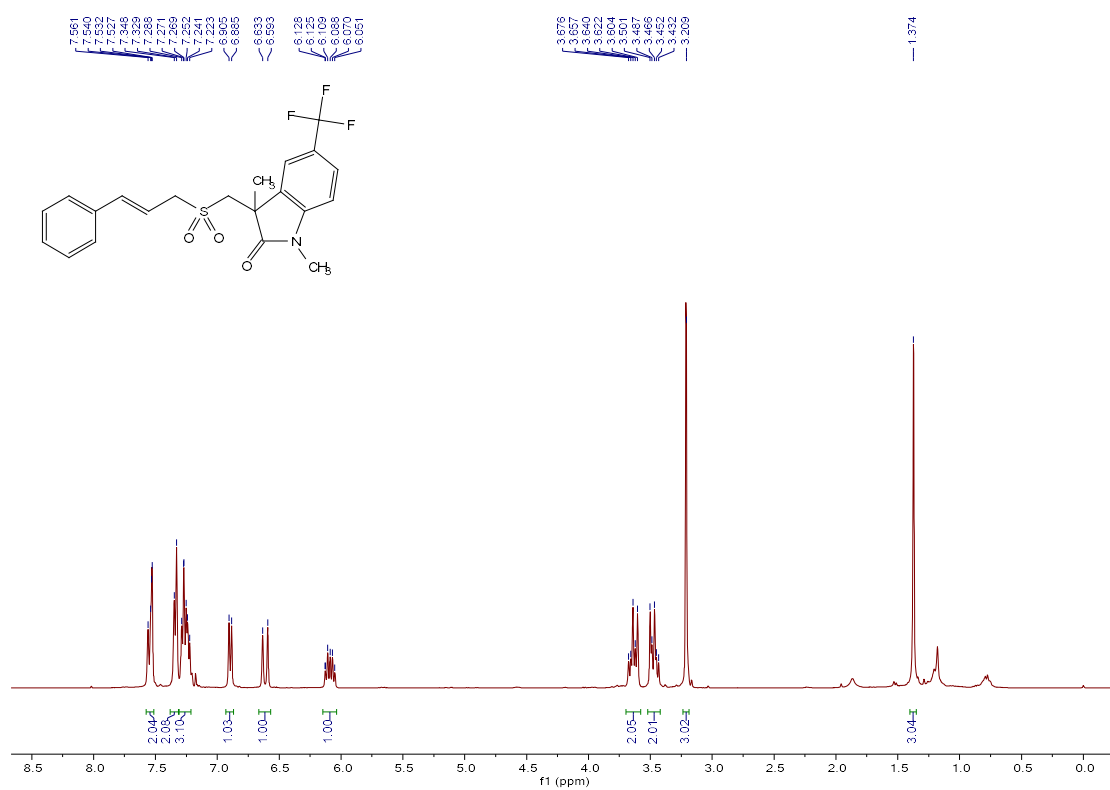

<sup>19</sup>F NMR spectrum (376 MHz, CDCl<sub>3</sub>) of compound **55**

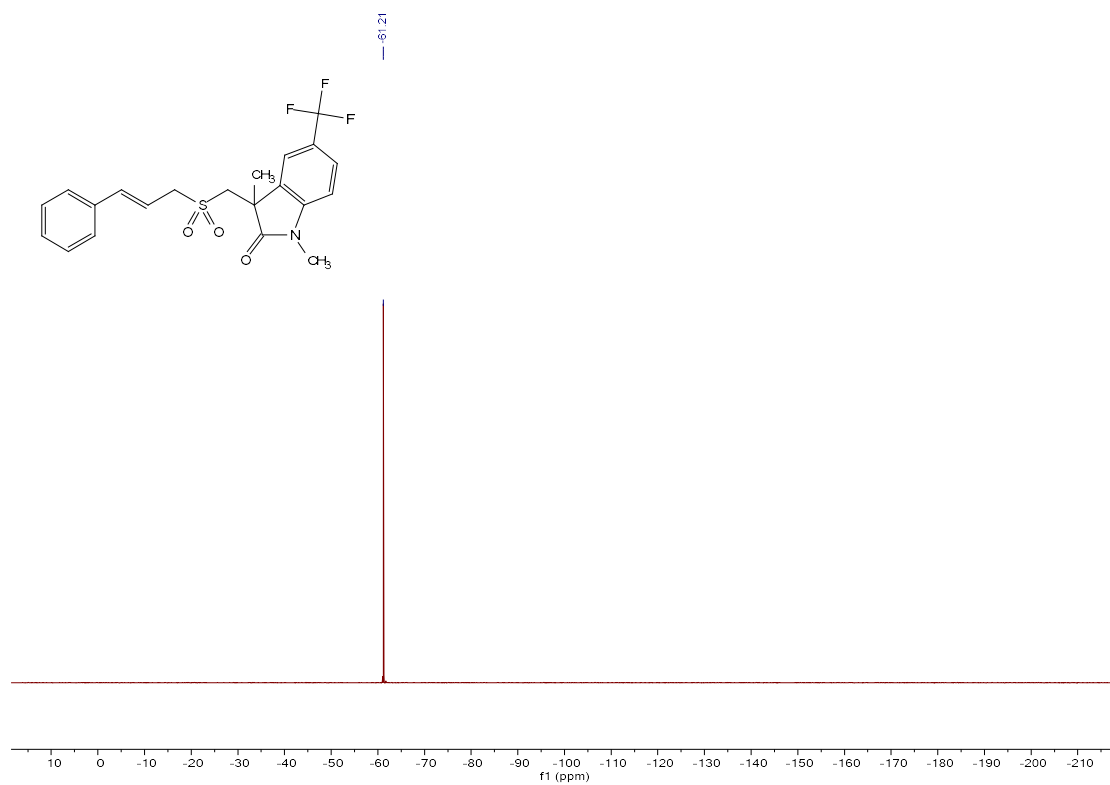

<sup>13</sup>C NMR spectrum (101 MHz, CDCl<sub>3</sub>) of compound **55**

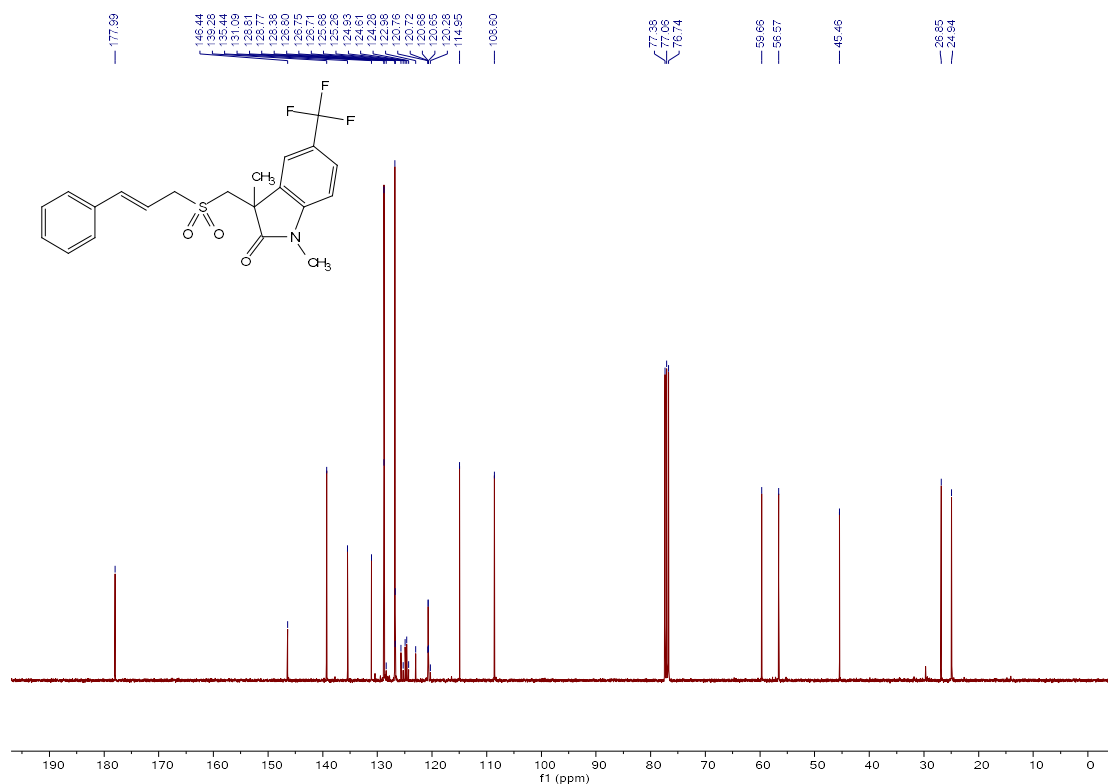

**Methyl 3-((cinnamylsulfonyl)methyl)-1,3-dimethyl-2-oxindole-6-carboxylate (56).**

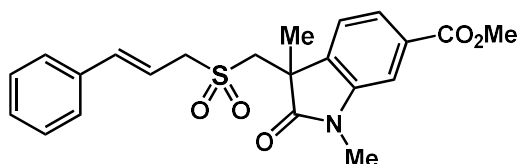

The product (70.3 mg, 85% yield) as light yellow solid was purified with silica gel chromatography (petroleum ether/ethyl acetate = 1/1). <sup>1</sup>H NMR (400 MHz, CDCl<sub>3</sub>) δ 7.76 (d, *J* = 8.0 Hz, 1H), 7.48 (s, 1H), 7.36-7.21 (m, 6H), 6.61 (d, *J* = 16.0 Hz, 1H), 6.11-6.03 (m, 1H), 3.85 (s, 3H), 3.70-3.63 (m, 2H), 3.53 (dd, *J* = 14.0 Hz, 7.2 Hz, 1H), 3.46 (d, *J* = 14.8 Hz, 1H), 3.22 (s, 3H), 1.37 (s, 3H); <sup>13</sup>C NMR (101 MHz, CDCl<sub>3</sub>) δ 177.7, 166.5, 139.3, 135.7, 135.5, 130.9, 128.7, 126.8, 124.4, 123.4, 114.9, 109.4, 59.7, 56.6, 52.3, 45.7, 26.8, 24.9; HRMS Calculated for C<sub>22</sub>H<sub>23</sub>NO<sub>5</sub> (M+H<sup>+</sup>): 414.1370; Found: 414.1371.

**<sup>1</sup>H NMR spectrum (400 MHz, CDCl<sub>3</sub>) of compound 56**

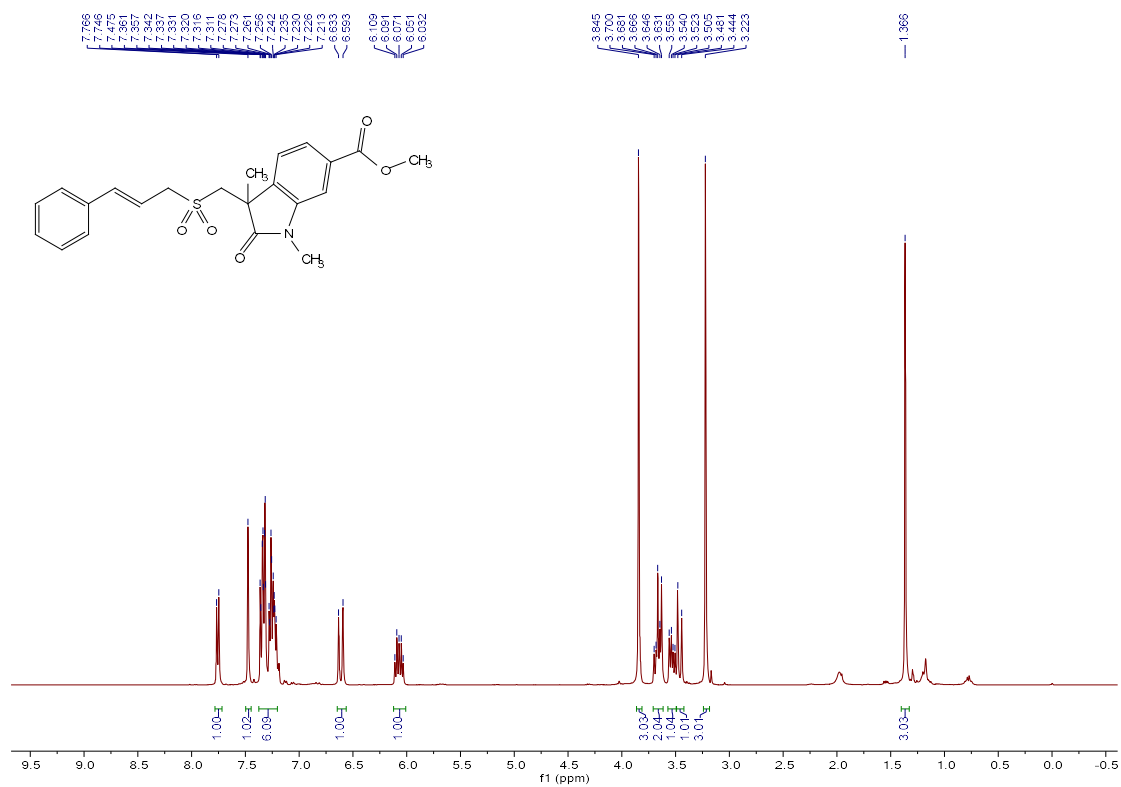

**<sup>13</sup>C NMR spectrum (101 MHz, CDCl<sub>3</sub>) of compound 56**

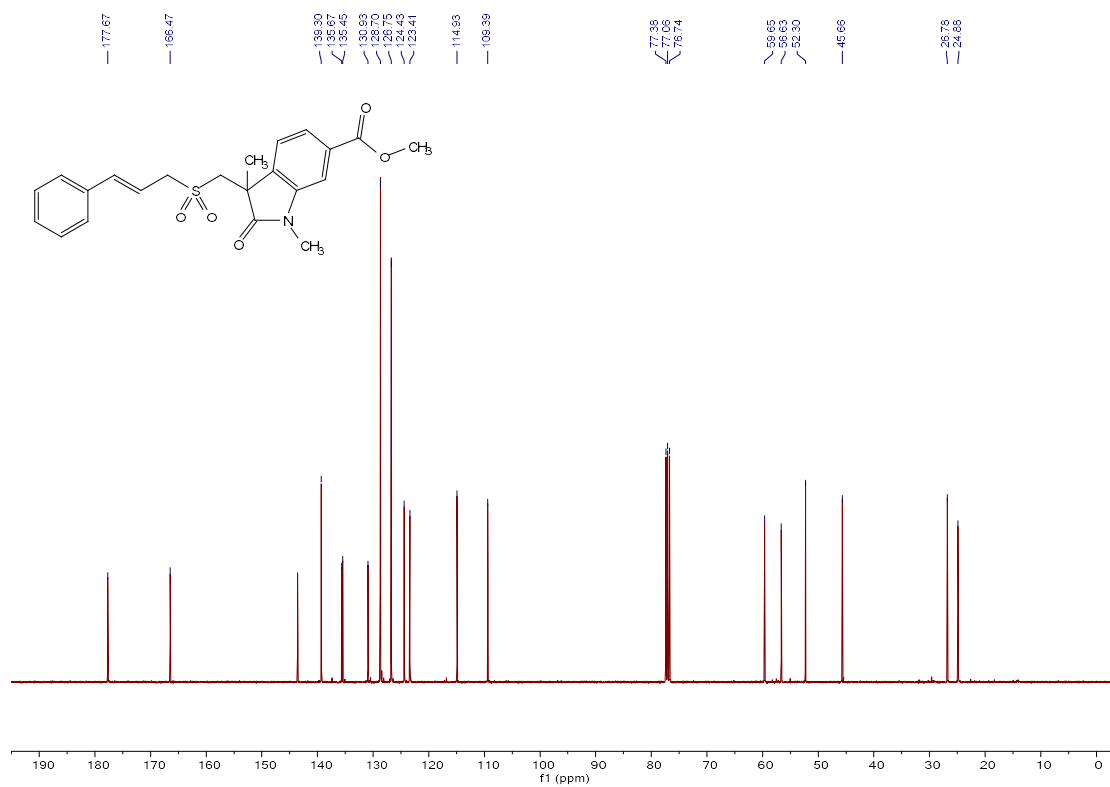

**6-chloro-3-((cinnamylsulfonyl)methyl)-1,3-dimethylindolin-2-one (57).**

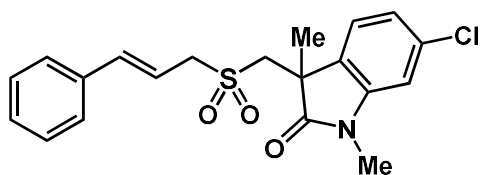

The product (71.0 mg, 91% yield) as light yellow solid was purified with silica gel chromatography (petroleum ether/ethyl acetate = 2/1).  $^1\text{H NMR}$  (400 MHz,  $\text{CDCl}_3$ )  $\delta$  7.45-7.43 (m, 2H), 7.39-7.30 (m, 4H), 7.10 (d,  $J = 8.0$  Hz, 1H), 6.92 (s, 1H), 6.71 (d,  $J = 16.0$  Hz, 1H), 6.22-6.14 (m, 1H), 3.77 (dd,  $J = 14.0$  Hz, 7.6 Hz, 1H), 3.70 (d,  $J = 15.6$  Hz, 1H), 3.65 (dd,  $J = 14.0$  Hz, 7.2 Hz, 1H), 3.53 (d,  $J = 14.4$  Hz, 1H), 3.26 (s, 3H), 1.44 (s, 3H);  $^{13}\text{C NMR}$  (101 MHz,  $\text{CDCl}_3$ )  $\delta$  177.9, 144.5, 139.3, 135.5, 134.7, 128.9, 128.7, 126.8, 124.6, 122.4, 114.9, 109.5, 59.7, 56.7, 45.2, 26.7, 24.9; HRMS Calculated for  $\text{C}_{20}\text{H}_{20}\text{ClNO}_3\text{S}$  ( $\text{M}+\text{H}^+$ ): 390.0925; Found: 390.0924.

$^1\text{H NMR}$  spectrum (400 MHz,  $\text{CDCl}_3$ ) of compound 57

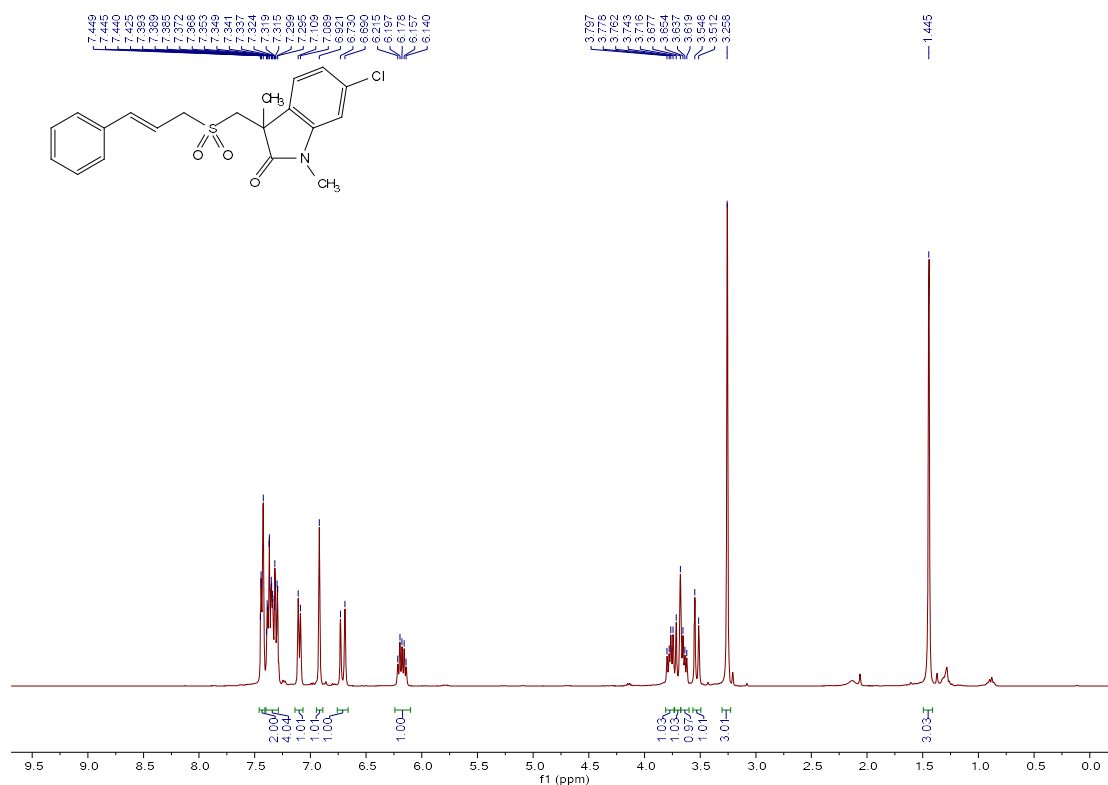



<sup>13</sup>C NMR spectrum (101 MHz, CDCl<sub>3</sub>) of compound **57**

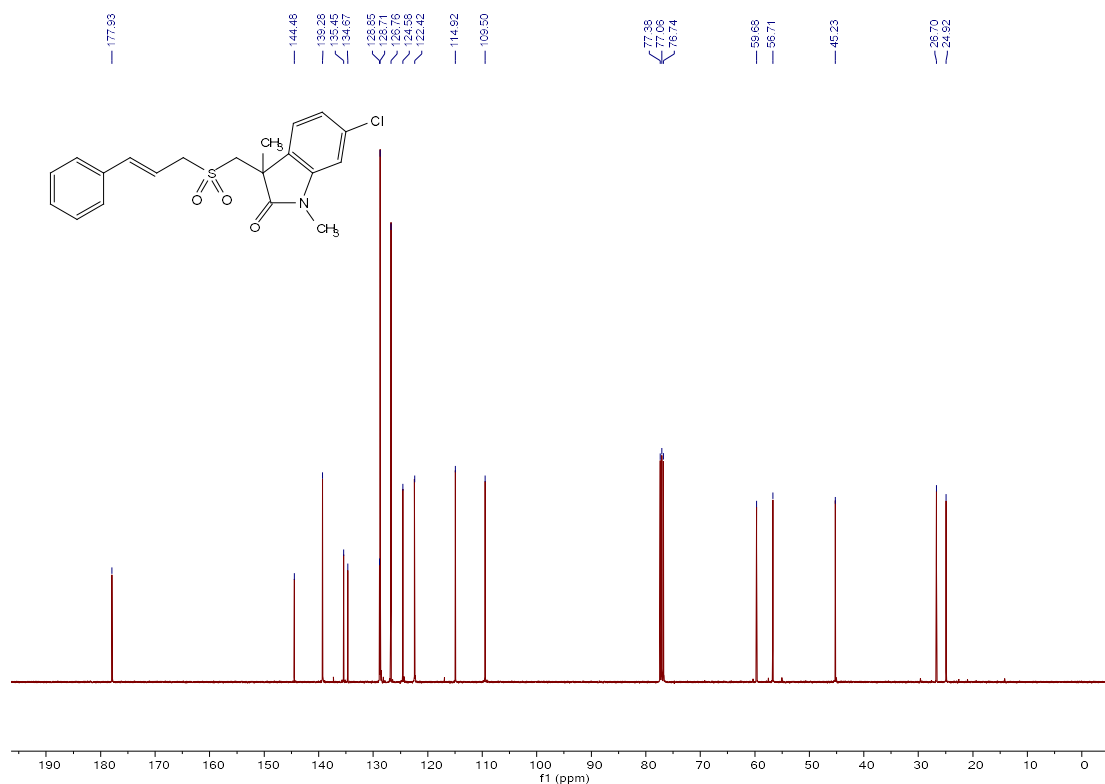

**3-butyl-3-((cinnamylsulfonyl)methyl)-5-methoxy-1-methylindolin-2-one (58).**

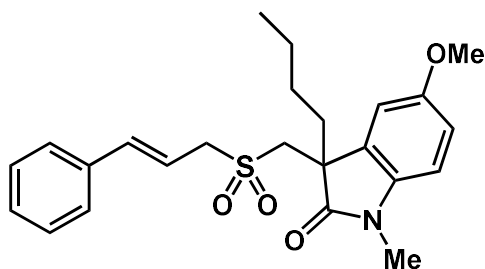

The product (70.1 mg, 82% yield) as brown solid was purified with silica gel chromatography (petroleum ether/ethyl acetate = 2/1). <sup>1</sup>H NMR (400 MHz, CDCl<sub>3</sub>) δ 7.46-7.43 (m, 2H), 7.39-7.31 (m, 3H), 6.96 (s, 1H), 6.89 (d, *J* = 8.4 Hz, 1H), 6.83 (d, *J* = 8.4 Hz, 1H), 6.69 (d, *J* = 16.8 Hz, 1H), 6.22-6.14 (m, 1H), 3.84 (s, 3H), 3.72 (dd, *J* = 14.4 Hz, 7.6 Hz, 1H), 3.67 (d, *J* = 14.8 Hz, 1H), 3.52-3.47 (m, 2H), 3.26 (s, 3H), 1.91-1.74 (m, 2H), 1.36-1.10 (m, 3H), 1.04-0.93 (m, 1H), 0.78 (t, *J* = 6.8 Hz, 3H); <sup>13</sup>C NMR (101 MHz, CDCl<sub>3</sub>) δ 176.9, 155.9, 139.1, 137.8, 135.6, 130.2, 128.7, 128.6, 126.8, 115.3, 112.6, 111.6, 108.8, 59.6, 56.9, 55.8, 50.0, 38.3, 26.6, 25.1, 22.5, 13.7; HRMS Calculated for C<sub>24</sub>H<sub>29</sub>NO<sub>4</sub>S (M+H<sup>+</sup>): 428.1890; Found: 428.1897.

<sup>1</sup>H NMR spectrum (400 MHz, CDCl<sub>3</sub>) of compound **58**

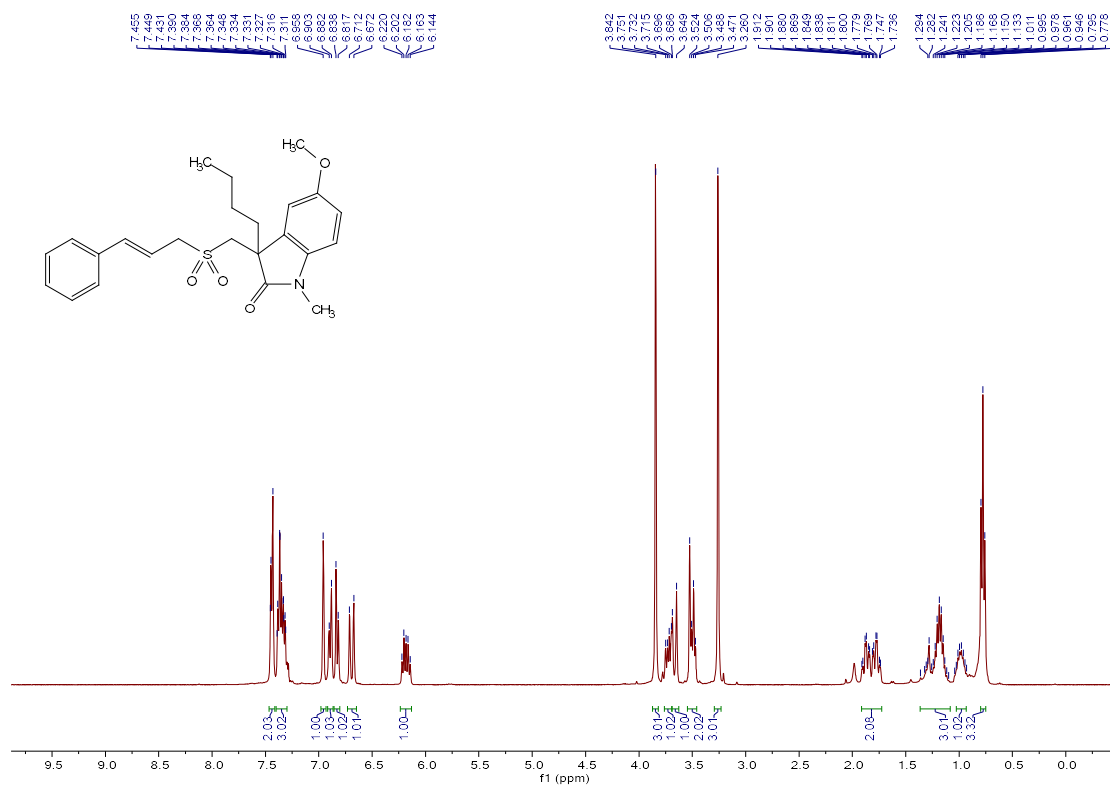

<sup>13</sup>C NMR spectrum (101 MHz, CDCl<sub>3</sub>) of compound **58**

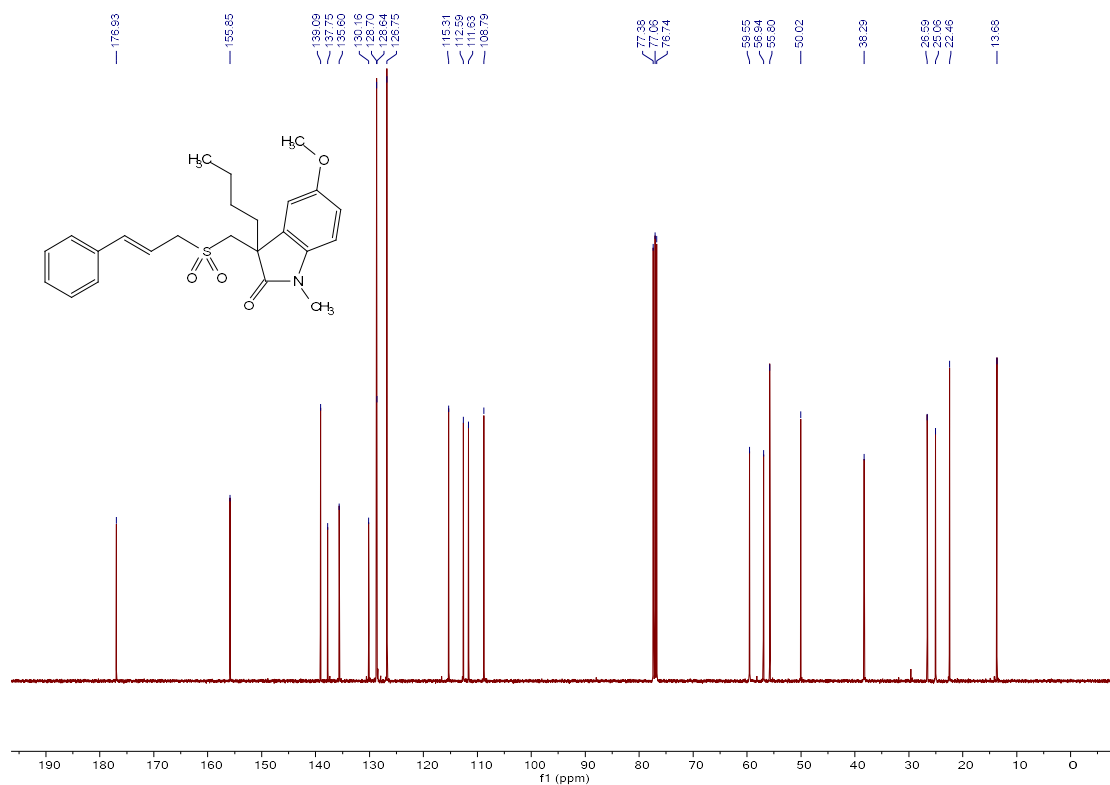

**3-benzyl-3-((cinnamylsulfonyl)methyl)-5-methoxy-1-methylindolin-2-one (59).**

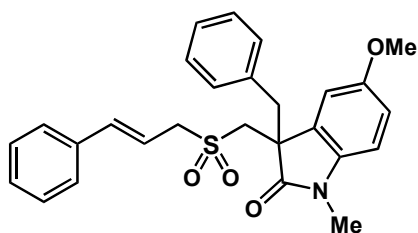

The product (73.9 mg, 80% yield) as brown solid was purified with silica gel chromatography (petroleum ether/ethyl acetate = 2/1). **<sup>1</sup>H NMR (400 MHz, CDCl<sub>3</sub>)** δ 7.46-7.44 (m, 2H), 7.40-7.33 (m, 3H), 7.15-7.07 (m, 3H), 6.92 (s, 1H), 6.84-6.79 (m, 3H), 6.73 (d, *J* = 16.0 Hz, 1H), 6.58 (d, *J* = 8.4 Hz, 1H), 6.25-6.17 (m, 1H), 3.87-3.78 (m, 5H), 3.65-3.58 (m, 2H), 3.08 (s, 2H), 3.01 (s, 3H); **<sup>13</sup>C NMR (101 MHz, CDCl<sub>3</sub>)** δ 176.2, 155.5, 139.3, 137.4, 135.6, 133.6, 130.1, 129.1, 128.73, 128.69, 127.7, 127.1, 126.8, 115.2, 113.2, 112.2, 108.7, 59.8, 56.0, 55.9, 51.4, 44.4, 26.3; **HRMS** Calculated for C<sub>27</sub>H<sub>27</sub>NO<sub>4</sub>S (M+H<sup>+</sup>): 462.1734; Found: 462.1736.

**<sup>1</sup>H NMR spectrum (400 MHz, CDCl<sub>3</sub>) of compound 59**

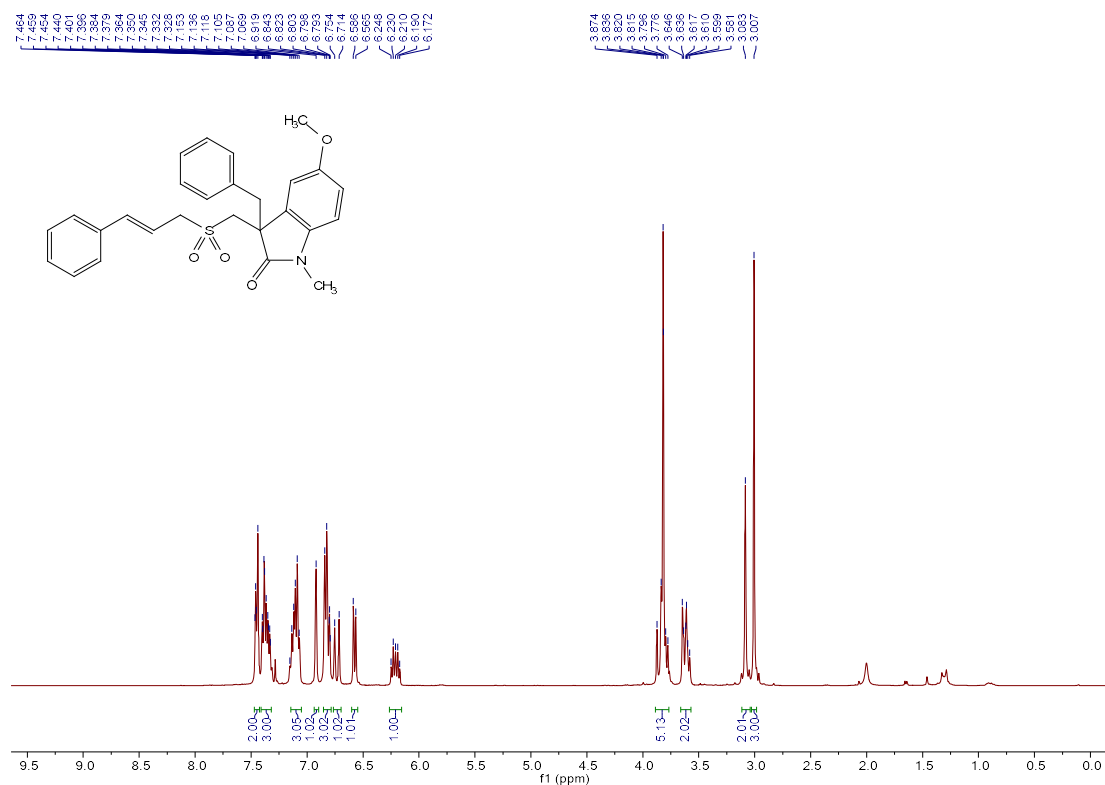

<sup>13</sup>C NMR spectrum (101 MHz, CDCl<sub>3</sub>) of compound **59**

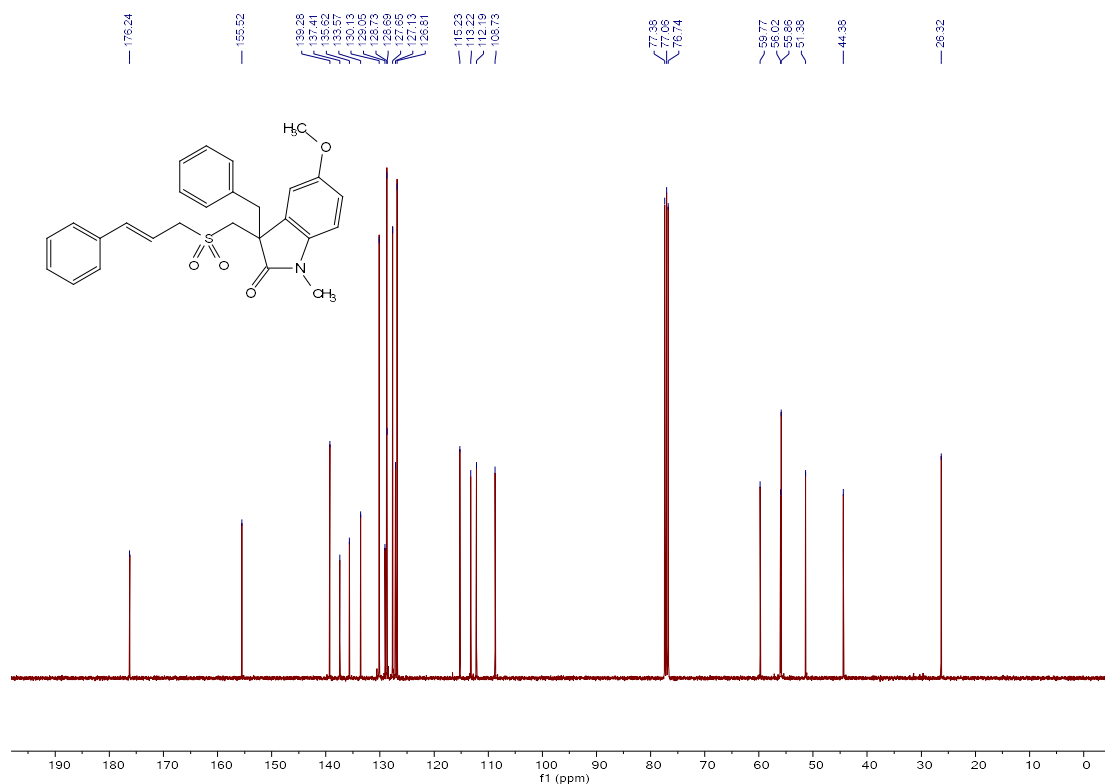

**3-(4-(*tert*-butyl)phenyl)-3-((cinnamylsulfonyl)methyl)-5-methoxy-1-methylindolin-2-one (60).**

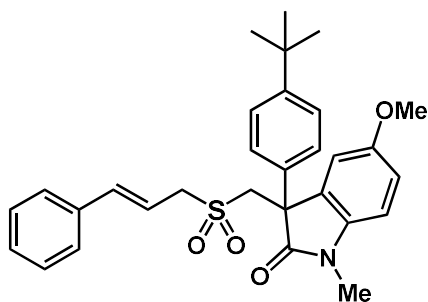

The product (78.6 mg, 78% yield) as light yellow solid was purified with silica gel chromatography (petroleum ether/ethyl acetate = 2/1). <sup>1</sup>H NMR (400 MHz, CDCl<sub>3</sub>) δ 7.35-7.33 (m, 2H), 7.28-7.18 (m, 7H), 6.99 (s, 1H), 6.85 (d, *J* = 8.4 Hz, 1H), 6.77 (d, *J* = 8.8 Hz, 1H), 6.66 (d, *J* = 15.6 Hz, 1H), 6.15-6.07 (m, 1H), 4.15 (d, *J* = 14.8 Hz, 1H), 3.77-3.70 (m, 5H), 3.46 (dd, *J* = 14.0 Hz, 7.6 Hz, 1H), 3.14 (s, 3H), 1.16 (s, 9H); <sup>13</sup>C NMR (101 MHz, CDCl<sub>3</sub>) δ 176.1, 155.7, 151.1, 139.2, 137.9, 135.6, 134.7, 129.9, 128.72, 128.67, 126.8, 126.2, 125.9, 115.3, 113.6, 113.3, 109.3, 59.8, 57.6, 55.9, 53.0, 34.4, 31.2, 27.0; HRMS Calculated for C<sub>30</sub>H<sub>33</sub>NO<sub>4</sub>S (M+H<sup>+</sup>): 504.2203; Found: 504.2206.

<sup>1</sup>H NMR spectrum (400 MHz, CDCl<sub>3</sub>) of compound **60**

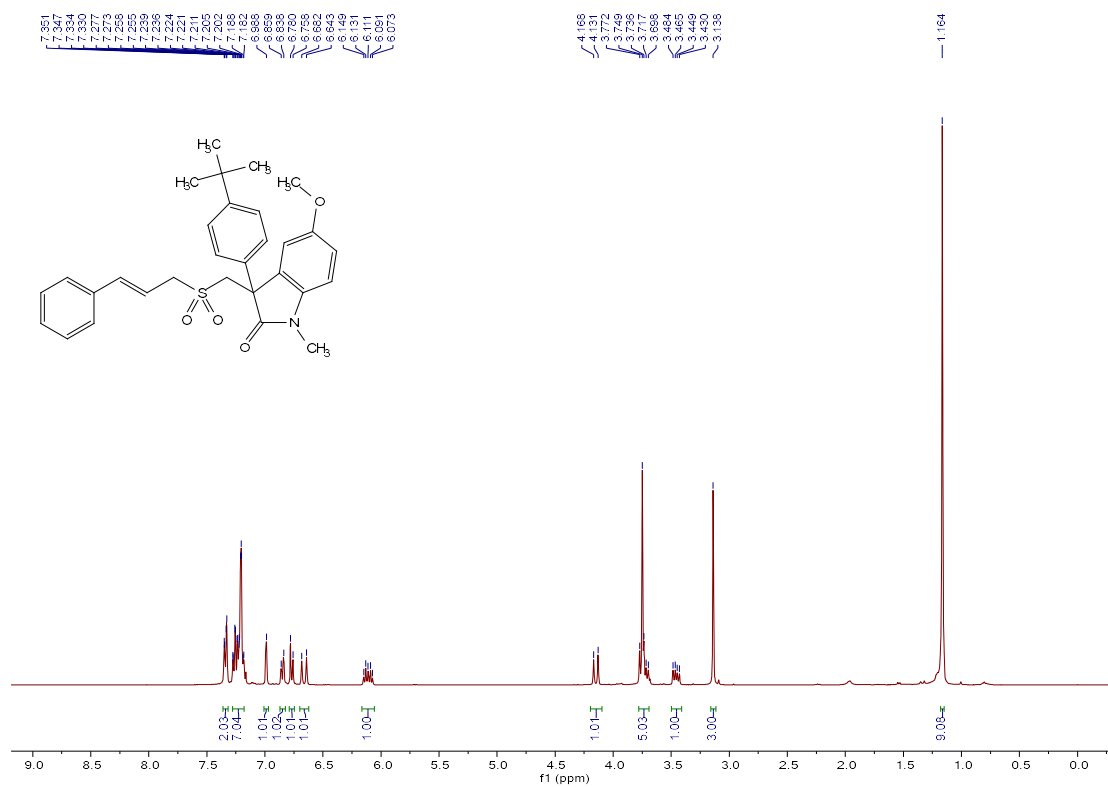

<sup>13</sup>C NMR spectrum (101 MHz, CDCl<sub>3</sub>) of compound **60**

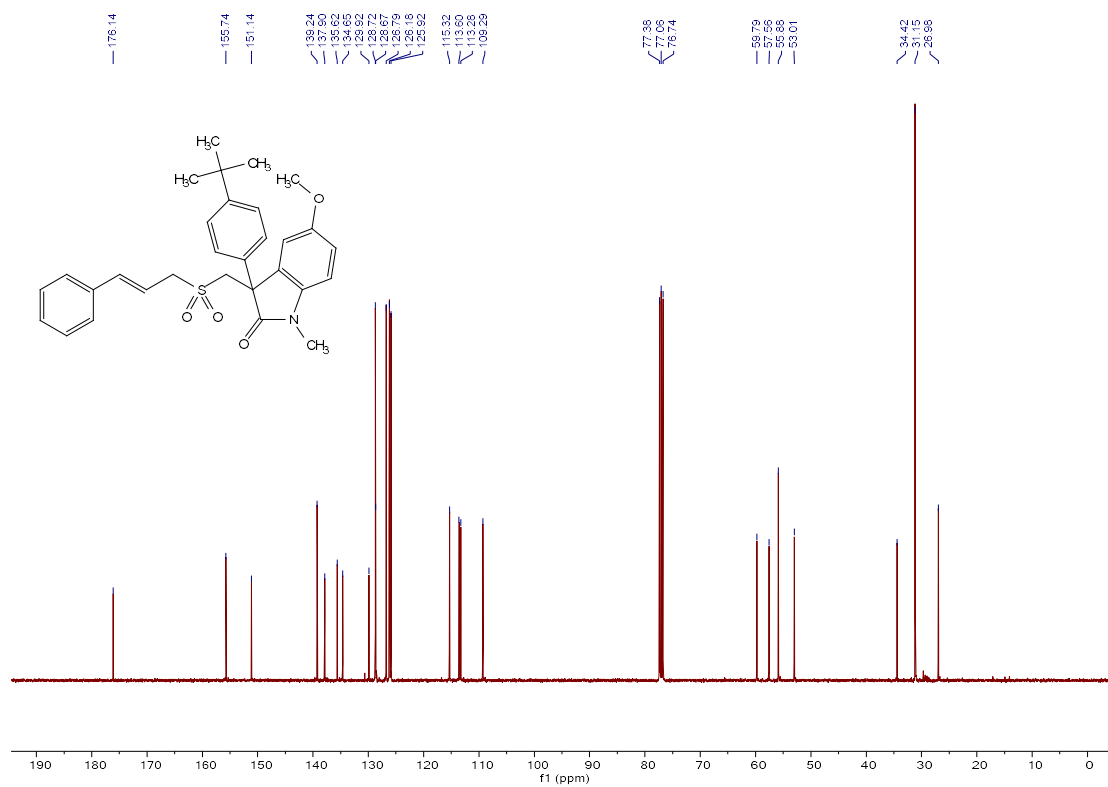

**3-((cinnamylsulfonyl)methyl)-3-cyclohexyl-5-methoxy-1-methylindolin-2-one (61).**

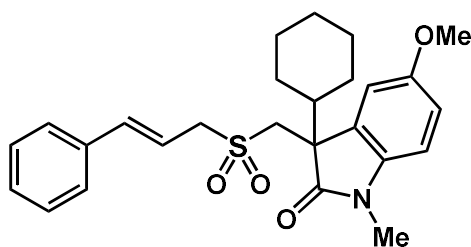

The product (76.2 mg, 84% yield) as light yellow solid was purified with silica gel chromatography (petroleum ether/ethyl acetate = 2/1). **<sup>1</sup>H NMR (400 MHz, CDCl<sub>3</sub>)** δ 7.46-7.43 (m, 2H), 7.39-7.31 (m, 3H), 6.92-6.87 (m, 2H), 6.81 (d, *J* = 8.4 Hz, 1H), 6.72 (d, *J* = 15.6 Hz, 1H), 6.23-6.15 (m, 1H), 3.84 (s, 3H), 3.78-3.71 (m, 2H), 3.63 (d, *J* = 14.4 Hz, 1H), 3.49 (dd, *J* = 13.6 Hz, 7.2 Hz, 1H), 3.25 (s, 3H), 1.85-1.73 (m, 2H), 1.65-1.57 (m, 3H), 1.51-1.47 (m, 1H), 1.24-1.13 (m, 3H), 1.05-0.96 (m, 1H), 0.86-0.76 (m, 1H); **<sup>13</sup>C NMR (101 MHz, CDCl<sub>3</sub>)** δ 177.0, 155.4, 139.0, 138.2, 135.7, 129.4, 128.7, 128.6, 126.7, 115.4, 112.6, 112.1, 108.5, 59.5, 55.8, 55.5, 53.2, 46.0, 26.7, 26.4, 26.3(m, 2C), 25.9, 25.8; **HRMS** Calculated for C<sub>26</sub>H<sub>31</sub>NO<sub>4</sub>S (M+H<sup>+</sup>): 454.2047; Found: 454.2049.

**<sup>1</sup>H NMR spectrum (400 MHz, CDCl<sub>3</sub>) of compound 61**

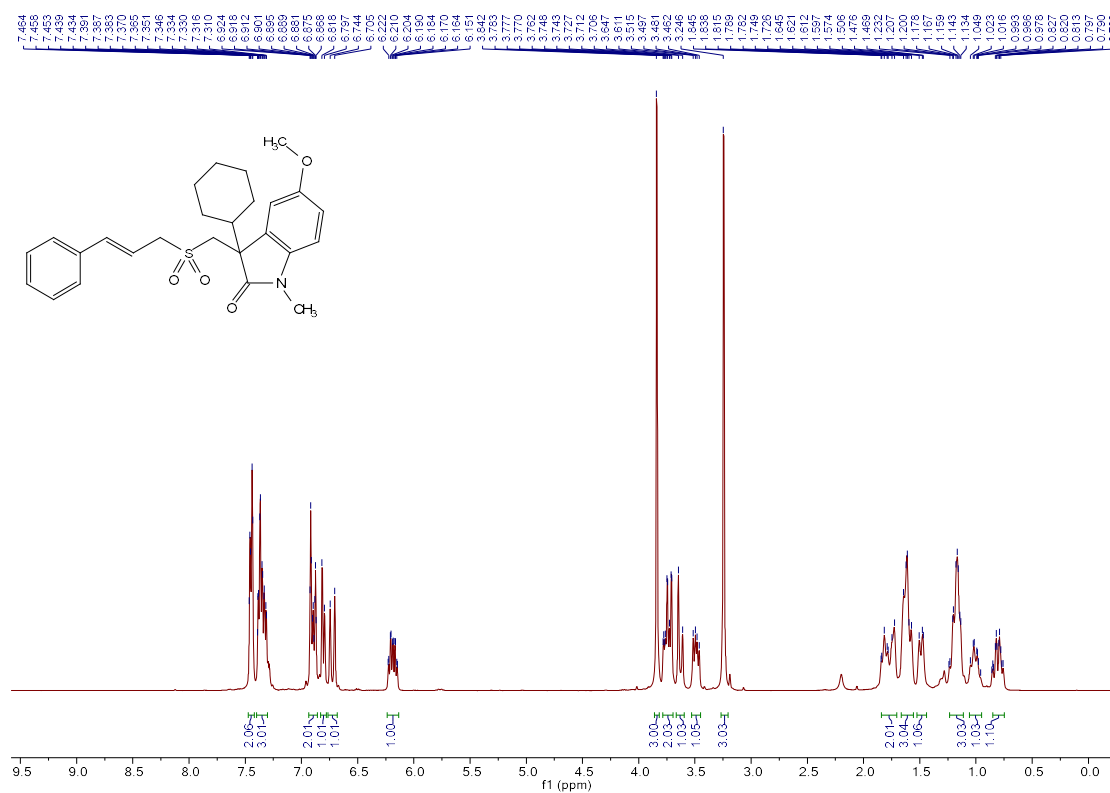

<sup>13</sup>C NMR spectrum (101 MHz, CDCl<sub>3</sub>) of compound **61**

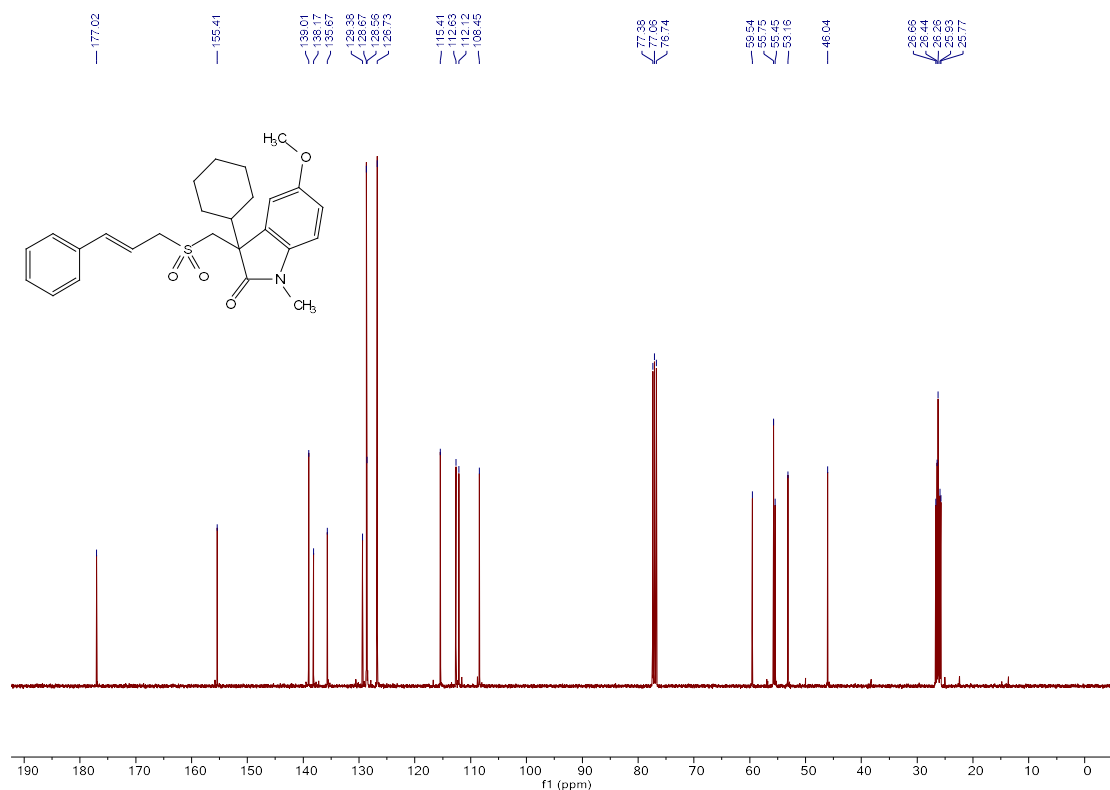

*tert*-butyl 3-((cinnamylsulfonyl)methyl)-3-methyl-2-oxindoline-1-carboxylate (**62**).

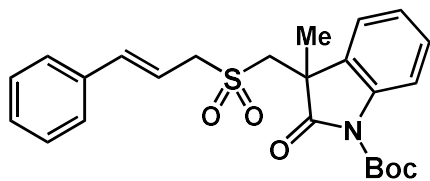

The product (63.6 mg, 72% yield) as yellow solid was purified with silica gel chromatography (petroleum ether/ethyl acetate = 2/1). <sup>1</sup>H NMR (400 MHz, CDCl<sub>3</sub>) δ 7.93 (d, *J* = 8.0 Hz, 1H), 7.44-7.32 (m, 7H), 7.28-7.23 (m, 1H), 6.68 (d, *J* = 16.0 Hz, 1H), 6.21-6.13 (m, 1H), 3.76 (d, *J* = 14.8 Hz, 1H), 3.70 (dd, *J* = 14.4 Hz, 7.6 Hz, 1H), 3.59-3.52 (m, 2H), 1.68 (s, 9H), 1.50 (s, 3H); <sup>13</sup>C NMR (101 MHz, CDCl<sub>3</sub>) δ 176.7, 149.0, 139.4, 139.3, 135.5, 129.3, 129.2, 128.7, 126.8, 124.4, 123.2, 115.7, 115.0, 59.5, 57.4, 46.2, 28.1, 26.1; HRMS Calculated for C<sub>24</sub>H<sub>27</sub>NO<sub>5</sub> (M+Na<sup>+</sup>): 464.1502; Found: 464.1504.

<sup>1</sup>H NMR spectrum (400 MHz, CDCl<sub>3</sub>) of compound **62**

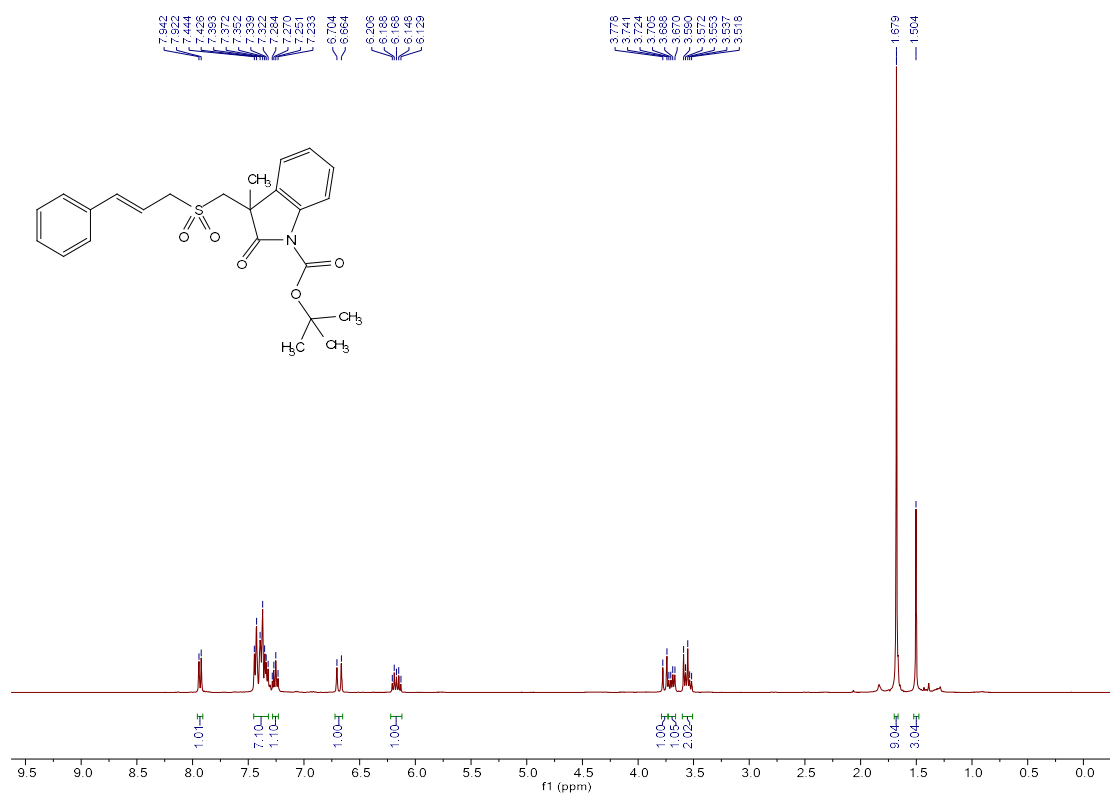

<sup>13</sup>C NMR spectrum (101 MHz, CDCl<sub>3</sub>) of compound **62**

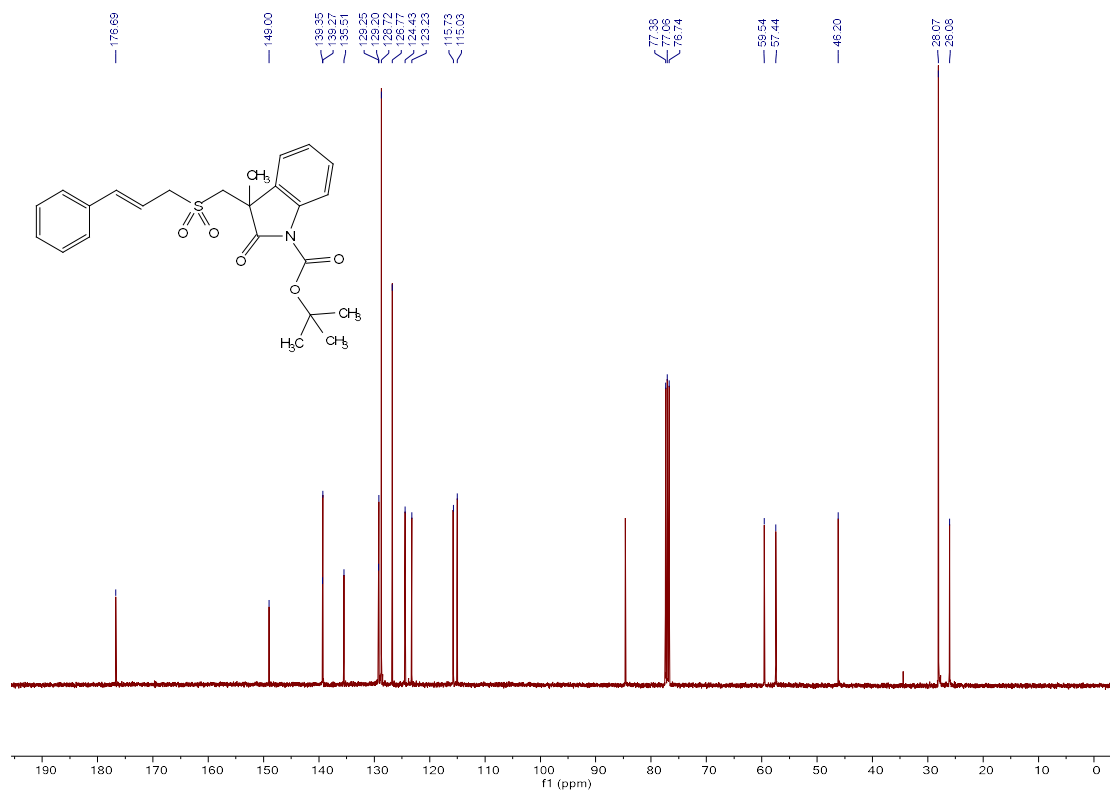



**1-acetyl-3-((cinnamylsulfonyl)methyl)-5-methoxy-3-methylindolin-2-one (63).**

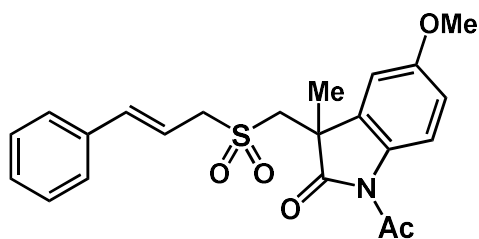

The product (52.9 mg, 64% yield) as yellow oil was purified with silica gel chromatography (petroleum ether/ethyl acetate = 2/1). **<sup>1</sup>H NMR (400 MHz, CDCl<sub>3</sub>)** δ 8.28 (d, *J* = 8.8 Hz, 1H), 7.46-7.43 (m, 2H), 7.41-7.33 (m, 3H), 6.95-6.92 (m, 2H), 6.62 (d, *J* = 15.6 Hz, 1H), 6.18-6.10 (m, 1H), 3.87 (s, 3H), 3.71-3.61 (m, 2H), 3.56 (dd, *J* = 14.0 Hz, 6.4 Hz, 1H), 3.32 (dd, *J* = 14.4 Hz, 8.4 Hz, 1H), 2.71 (s, 3H), 1.49 (s, 3H); **<sup>13</sup>C NMR (101 MHz, CDCl<sub>3</sub>)** δ 178.7, 170.7, 157.1, 139.3, 135.4, 133.2, 130.6, 128.9, 128.8, 126.8, 118.3, 114.9, 113.2, 110.0, 59.3, 57.9, 55.7, 46.3, 26.4, 26.1; **HRMS** Calculated for C<sub>22</sub>H<sub>23</sub>NO<sub>5</sub>S (M+H<sup>+</sup>): 414.1370; Found: 414.1371.

**<sup>1</sup>H NMR spectrum (400 MHz, CDCl<sub>3</sub>) of compound 63**

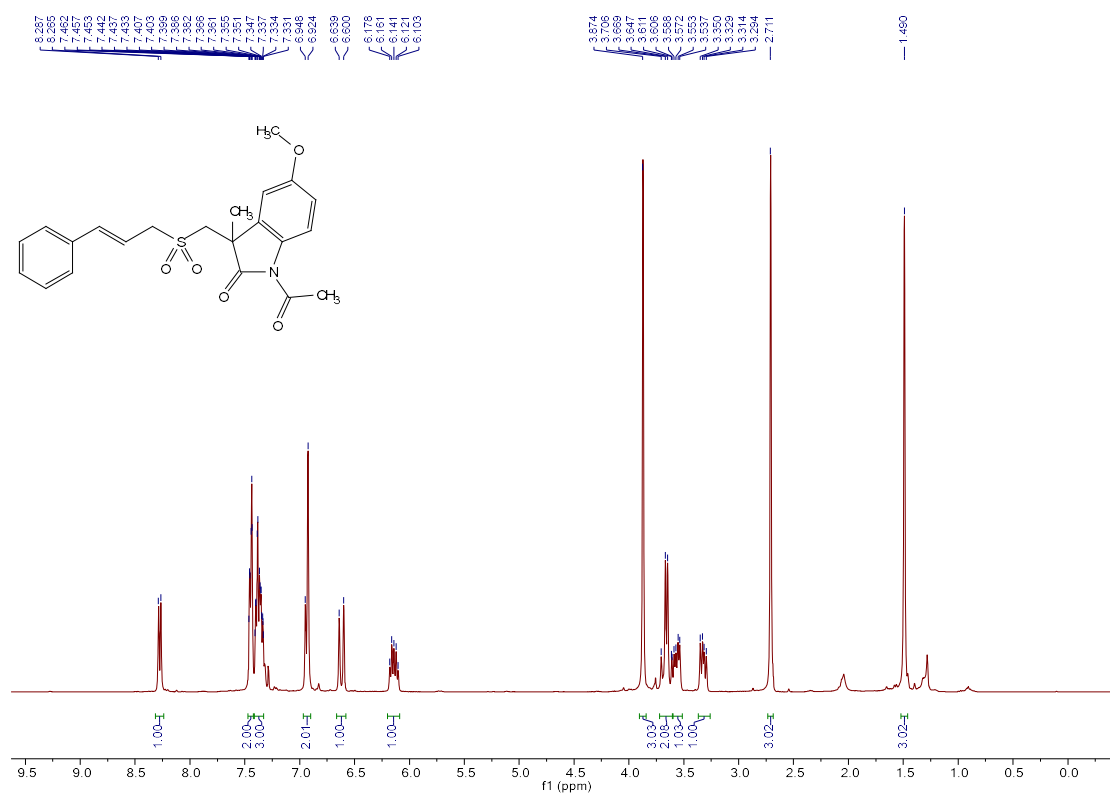

<sup>13</sup>C NMR spectrum (101 MHz, CDCl<sub>3</sub>) of compound **63**

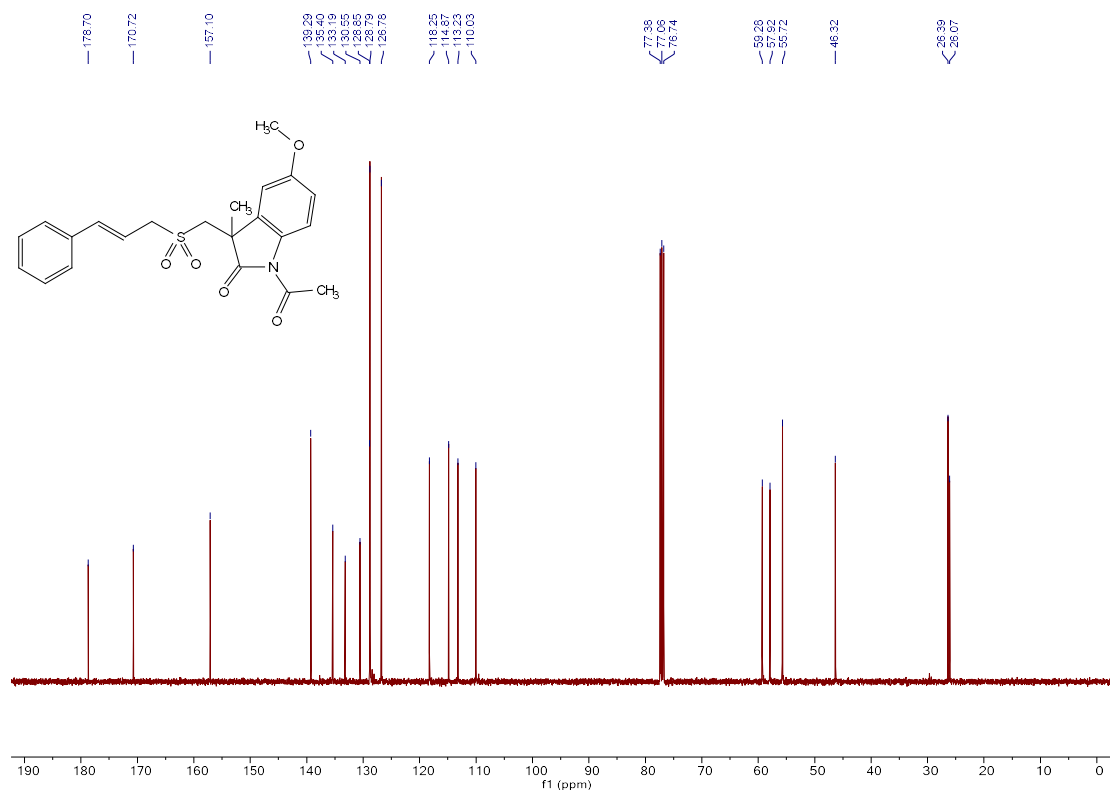

ethyl 2-(3-((cinnamylsulfonyl)methyl)-5-methoxy-3-methyl-2-oxindolin-1-yl) acetate (**64**).

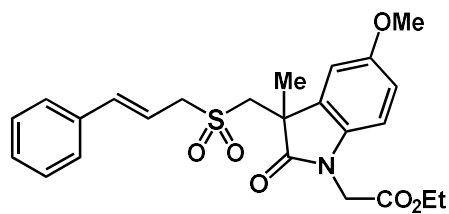

The product (75.0 mg, 82% yield) as yellow solid was purified with silica gel chromatography (petroleum ether/ethyl acetate = 2/1). <sup>1</sup>H NMR (400 MHz, CDCl<sub>3</sub>) δ 7.34-7.32 (m, 2H), 7.28-7.20 (m, 3H), 6.96 (s, 1H), 6.75 (d, *J* = 8.8 Hz, 1H), 6.64-6.58 (m, 2H), 6.13-6.05 (m, 1H), 4.59 (d, *J* = 17.6 Hz, 1H), 4.20 (d, *J* = 17.6 Hz, 1H), 4.12 (q, *J* = 6.8 Hz, 2H), 3.72 (s, 3H), 3.67 (dd, *J* = 14.0 Hz, 8.4 Hz, 1H), 3.57 (d, *J* = 14.8 Hz, 1H), 3.51 (dd, *J* = 14.0 Hz, 7.6 Hz, 1H), 3.44 (d, *J* = 14.8 Hz, 1H), 1.42 (s, 3H), 1.17 (t, *J* = 7.2 Hz, 3H); <sup>13</sup>C NMR (101 MHz, CDCl<sub>3</sub>) δ 177.6, 167.5, 156.2, 139.2, 135.6, 135.2, 131.6, 128.7, 128.6, 126.8, 115.1, 113.0, 111.5, 109.1, 61.7, 59.4, 56.6, 55.8, 46.1, 41.7, 25.2, 14.1; HRMS Calculated for C<sub>24</sub>H<sub>27</sub>NO<sub>6</sub>S (M+H<sup>+</sup>): 458.1632; Found: 458.1635.



**1-benzyl-3-((cinnamylsulfonyl)methyl)-5-methoxy-3-methylindolin-2-one (65).**

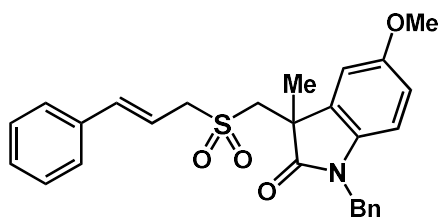

The product (83.1 mg, 90% yield) as yellow oil was purified with silica gel chromatography (petroleum ether/ethyl acetate = 2/1).  $^1\text{H NMR}$  (400 MHz,  $\text{CDCl}_3$ )  $\delta$  7.34-7.31 (m, 2H), 7.27-7.15 (m, 8H), 6.91 (s, 1H), 6.64-6.54 (m, 3H), 6.13-6.05 (m, 1H), 4.93 (d,  $J = 15.6$  Hz, 1H), 4.78 (d,  $J = 15.6$  Hz, 1H), 3.70-3.62 (m, 5H), 3.50 (dd,  $J = 14.4$  Hz, 7.6 Hz, 1H), 3.46 (d,  $J = 14.4$  Hz, 1H), 1.40 (s, 3H);  $^{13}\text{C NMR}$  (101 MHz,  $\text{CDCl}_3$ )  $\delta$  177.7, 155.9, 139.2, 135.69, 135.68, 135.6, 132.0, 128.74, 128.69, 128.6, 127.5, 127.2, 126.8, 115.2, 112.7, 111.3, 110.2, 59.5, 56.6, 55.7, 46.1, 44.2, 25.7; HRMS Calculated for  $\text{C}_{27}\text{H}_{27}\text{NO}_4\text{S}$  ( $\text{M}+\text{H}^+$ ): 462.1734; Found: 462.1736.

$^1\text{H NMR}$  spectrum (400 MHz,  $\text{CDCl}_3$ ) of compound **65**

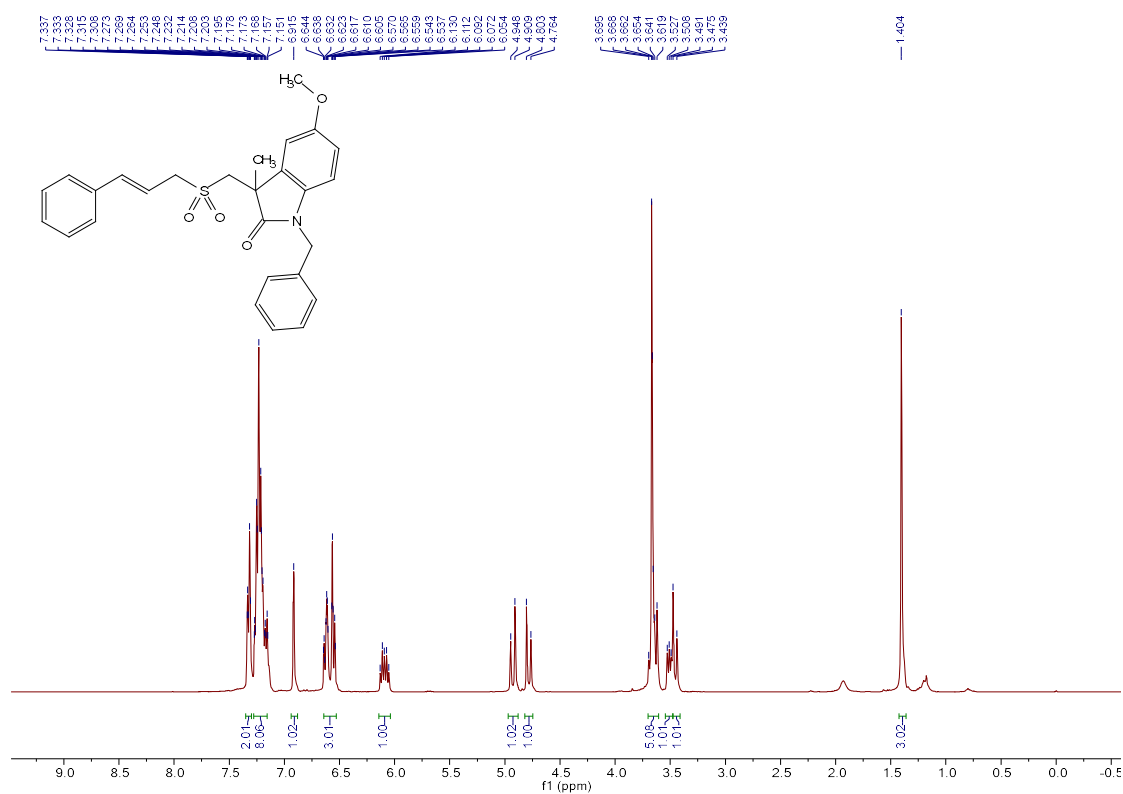

<sup>13</sup>C NMR spectrum (101 MHz, CDCl<sub>3</sub>) of compound **65**

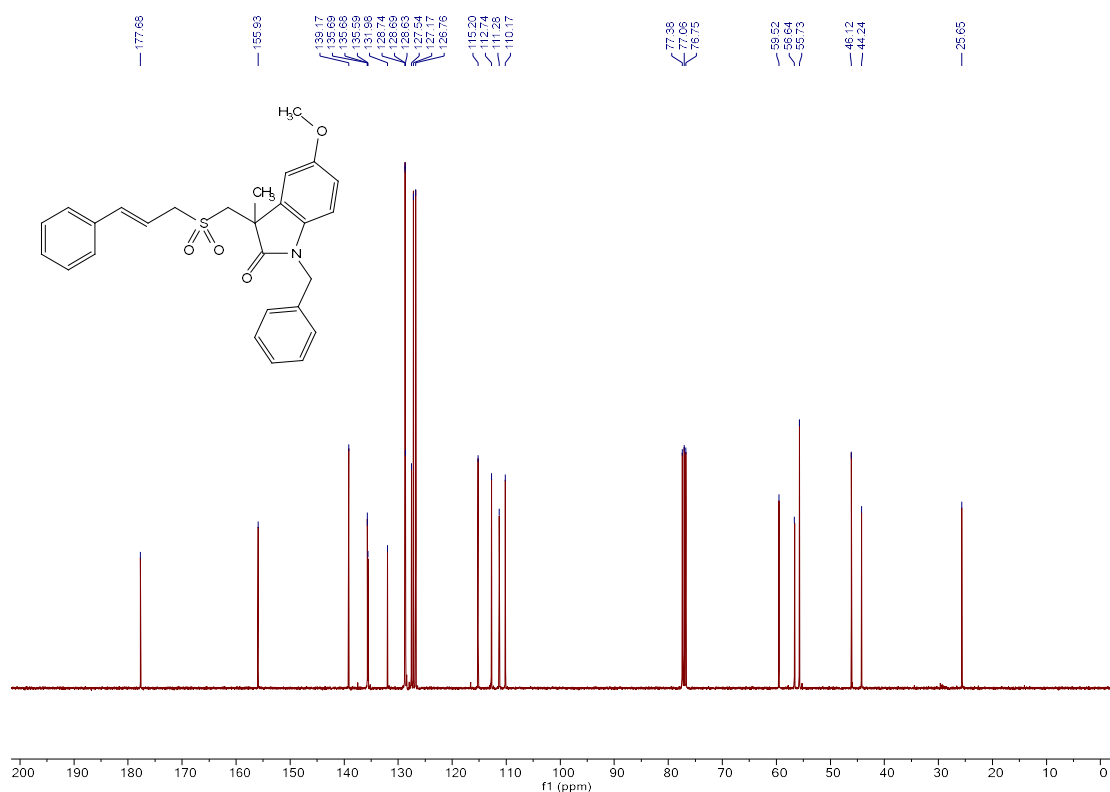

**3-((cinnamylsulfonyl)methyl)-3-methyl-1-propylindolin-2-one (66).**

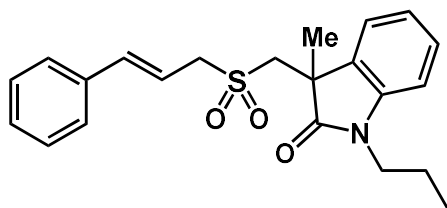

The product (61.4 mg, 80% yield) as yellow solid was purified with silica gel chromatography (petroleum ether/ethyl acetate = 2/1). <sup>1</sup>H NMR (400 MHz, CDCl<sub>3</sub>) δ 7.45-7.32 (m, 7H), 7.13 (t, *J* = 7.6 Hz, 1H), 6.95 (d, *J* = 7.6 Hz, 1H), 6.69 (d, *J* = 16.0 Hz, 1H), 6.23-6.15 (m, 1H), 3.78-3.69 (m, 4H), 3.60 (dd, *J* = 14.0 Hz, 7.2 Hz, 1H), 3.54 (d, *J* = 14.4 Hz, 1H), 1.82-1.73 (m, 2H), 1.47 (s, 3H), 1.01 (t, *J* = 7.6 Hz, 3H); <sup>13</sup>C NMR (101 MHz, CDCl<sub>3</sub>) δ 177.8, 142.8, 139.1, 135.6, 130.7, 128.8, 128.7, 128.6, 126.7, 123.6, 122.3, 115.3, 109.0, 59.5, 56.7, 45.5, 41.9, 25.3, 20.5, 11.4; HRMS Calculated for C<sub>22</sub>H<sub>25</sub>NO<sub>3</sub>S (M+H<sup>+</sup>): 384.1628; Found: 384.1628.



**3-((cinnamylsulfonyl)methyl)-3-methylindolin-2-one (67).**

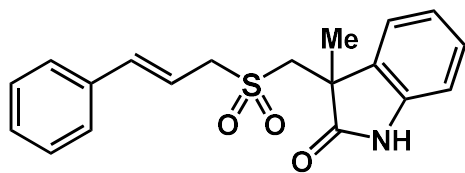

The product (28.7 mg, 42% yield) as yellow solid was purified with silica gel chromatography (petroleum ether/ethyl acetate = 2/1). <sup>1</sup>H NMR (400 MHz, CDCl<sub>3</sub>) δ 8.63 (s, 1H), 7.33-7.31 (m, 2H), 7.27-7.21 (m, 4H), 7.18-7.14 (m, 1H), 7.00 (t, *J* = 7.6 Hz, 1H), 6.87 (d, *J* = 7.6 Hz, 1H), 6.58 (d, *J* = 15.6 Hz, 1H), 6.12-6.04 (m, 1H), 3.66-3.61 (m, 2H), 3.54-3.48 (m, 2H), 1.39 (s, 3H); <sup>13</sup>C NMR (101 MHz, CDCl<sub>3</sub>) δ 180.0, 140.7, 139.4, 135.6, 130.8, 129.0, 128.74, 128.71, 126.8, 123.8, 122.5, 115.0, 110.8, 59.5, 57.0, 46.0, 25.2; HRMS Calculated for C<sub>19</sub>H<sub>19</sub>NO<sub>3</sub>S (M+H<sup>+</sup>): 342.1158; Found: 342.1158.

<sup>1</sup>H NMR spectrum (400 MHz, CDCl<sub>3</sub>) of compound 67

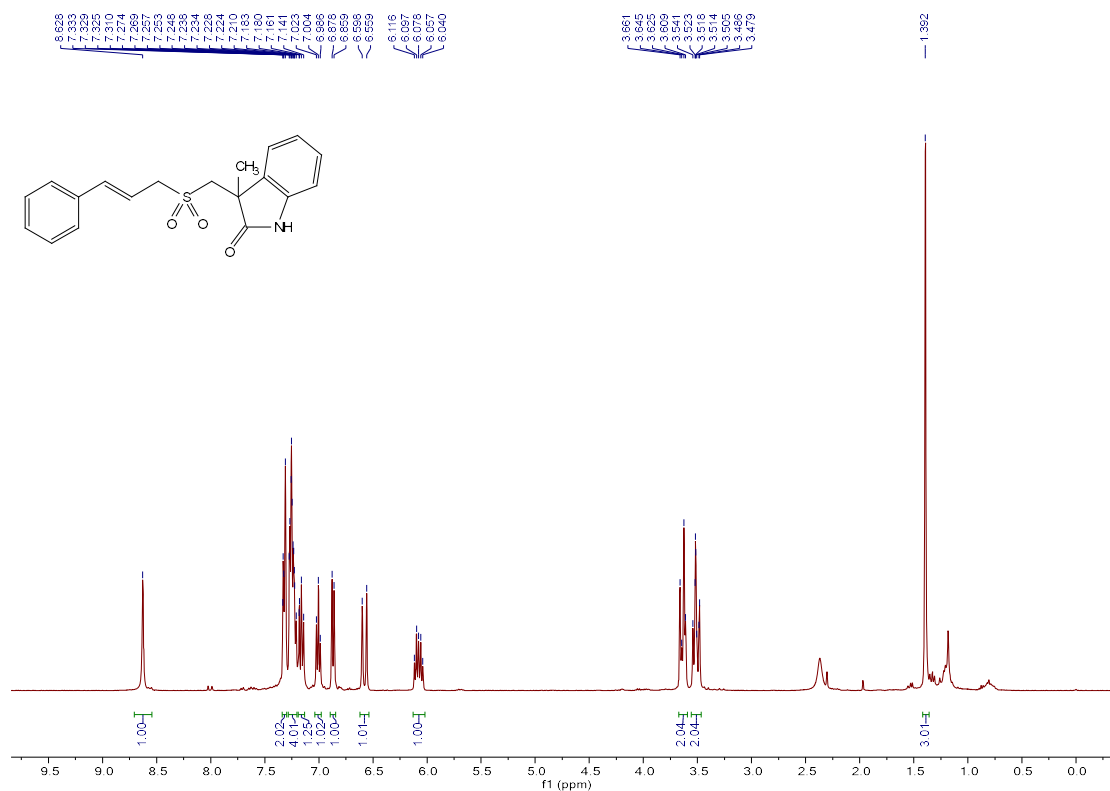

<sup>13</sup>C NMR spectrum (101 MHz, CDCl<sub>3</sub>) of compound **67**

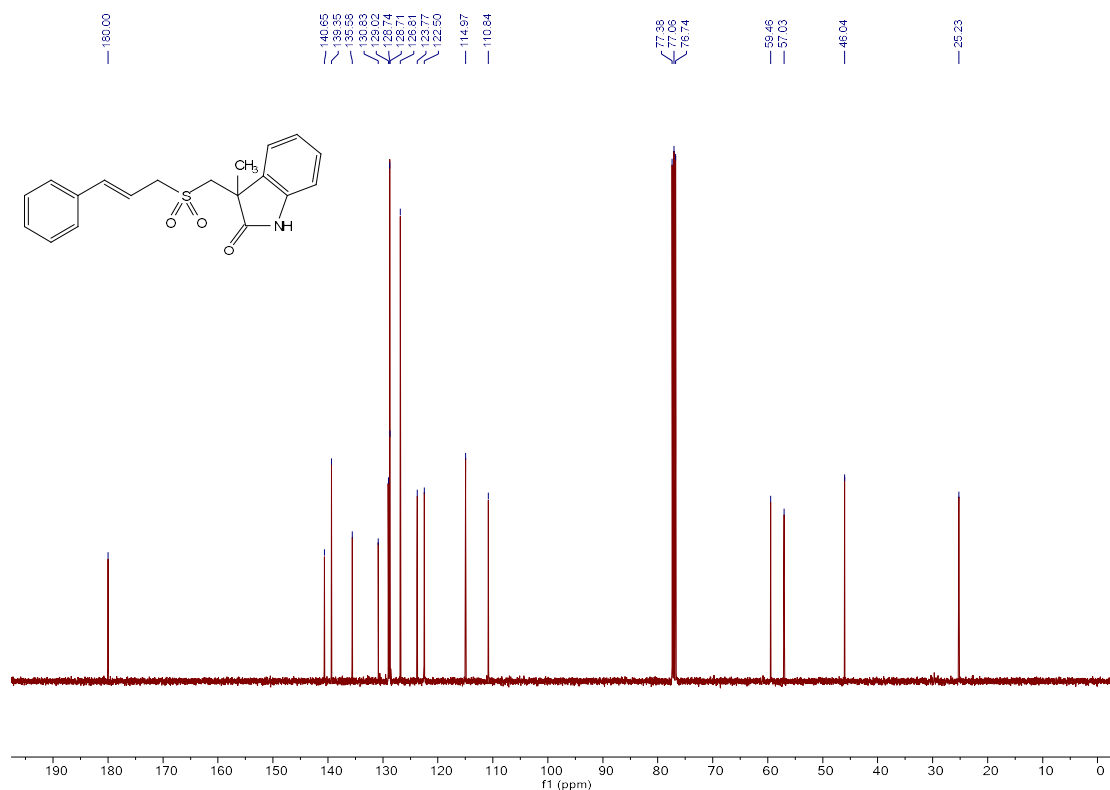

**1-(3-((cinnamylsulfonyl)methyl)-3-methylindolin-1-yl)ethan-1-one (68).**

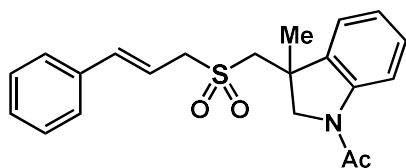

The product (50.3 mg, 68% yield) as yellow oil was purified with silica gel chromatography (petroleum ether/ethyl acetate = 5/1). <sup>1</sup>H NMR (400 MHz, CDCl<sub>3</sub>) δ 8.14 (d, *J* = 8.0 Hz, 1H), 7.32-7.18 (m, 6H), 7.06 (d, *J* = 7.2 Hz, 1H), 7.00 (t, *J* = 7.2 Hz, 1H), 6.49 (d, *J* = 15.6 Hz, 1H), 6.12-6.05 (m, 1H), 4.47 (d, *J* = 10.8 Hz, 1H), 3.78 (d, *J* = 10.8 Hz, 1H), 3.60 (d, *J* = 7.2 Hz, 2H), 3.19 (dd, *J* = 26.4 Hz, 14.4 Hz, 2H), 2.13 (s, 3H), 1.61 (s, 3H); <sup>13</sup>C NMR (101 MHz, CDCl<sub>3</sub>) δ 169.0, 141.7, 139.4, 136.6, 135.3, 129.2, 128.9, 128.8, 126.8, 124.2, 122.3, 117.5, 114.8, 60.03, 59.95, 59.0, 42.7, 25.7, 24.1; HRMS Calculated for C<sub>21</sub>H<sub>23</sub>NO<sub>3</sub>S (M+H<sup>+</sup>): 370.1471; Found: 370.1470.





**1-((cinnamylsulfonyl)methyl)-1-methyl-2,3-dihydro-1*H*-indene (69).**

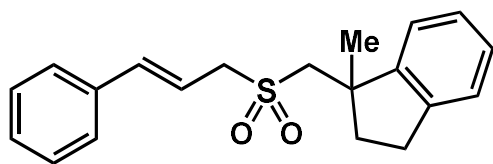

The product (58.8 mg, 90% yield) as yellow oil was purified with silica gel chromatography (petroleum ether/ethyl acetate = 5/1). **<sup>1</sup>H NMR (400 MHz, CDCl<sub>3</sub>)** δ 7.28-7.13 (m, 9H), 6.26 (d, *J* = 16.0 Hz, 1H), 6.10-6.02 (m, 1H), 3.51 (dd, *J* = 14.4 Hz, 6.8 Hz, 1H), 3.42 (dd, *J* = 14.0 Hz, 8.4 Hz, 1H), 3.29 (d, *J* = 14.4 Hz, 1H), 2.98 (d, *J* = 14.4 Hz, 1H), 2.85-2.81 (m, 2H), 2.41-2.34 (m, 1H), 2.03-1.95 (m, 1H), 1.54 (s, 3H); **<sup>13</sup>C NMR (101 MHz, CDCl<sub>3</sub>)** δ 148.1, 143.1, 138.8, 135.6, 128.7, 128.6, 127.7, 126.67, 126.63, 125.1, 123.2, 115.8, 59.8, 59.3, 46.6, 39.5, 30.1, 26.1; **HRMS** Calculated for C<sub>20</sub>H<sub>22</sub>O<sub>2</sub>S (M+Na<sup>+</sup>): 349.1233; Found: 349.1238.

**<sup>1</sup>H NMR spectrum (400 MHz, CDCl<sub>3</sub>) of compound 69**

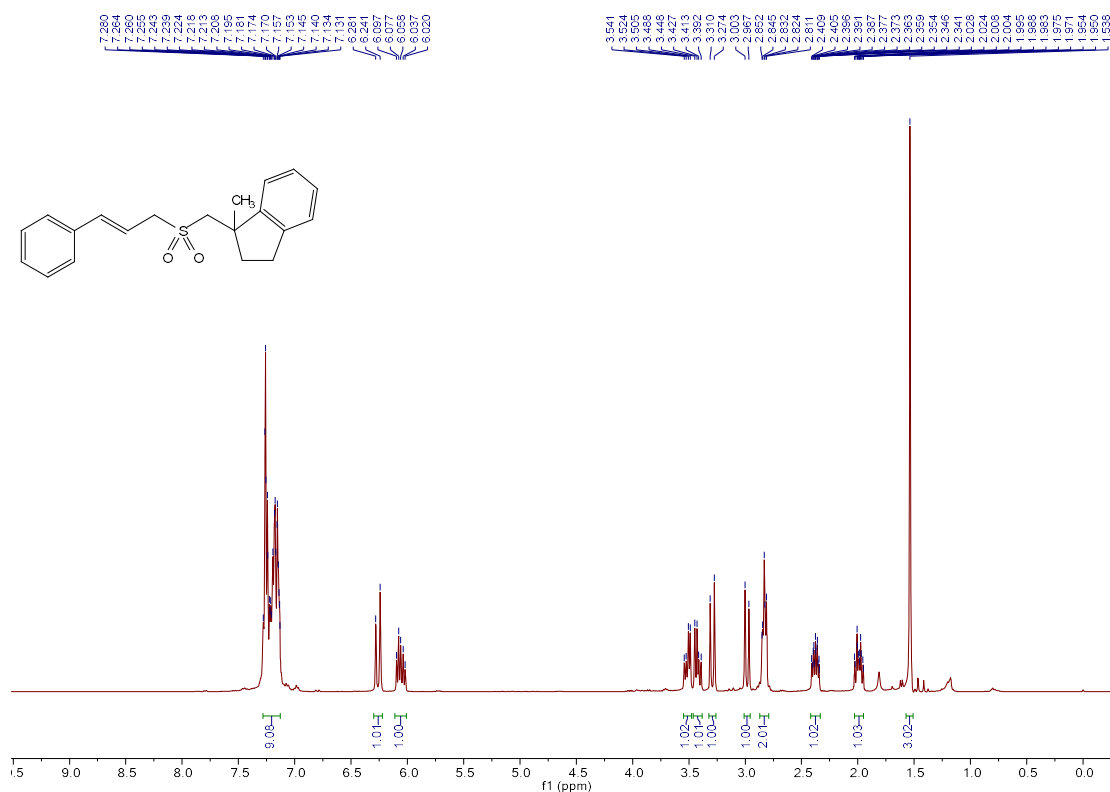

<sup>13</sup>C NMR spectrum (101 MHz, CDCl<sub>3</sub>) of compound **69**

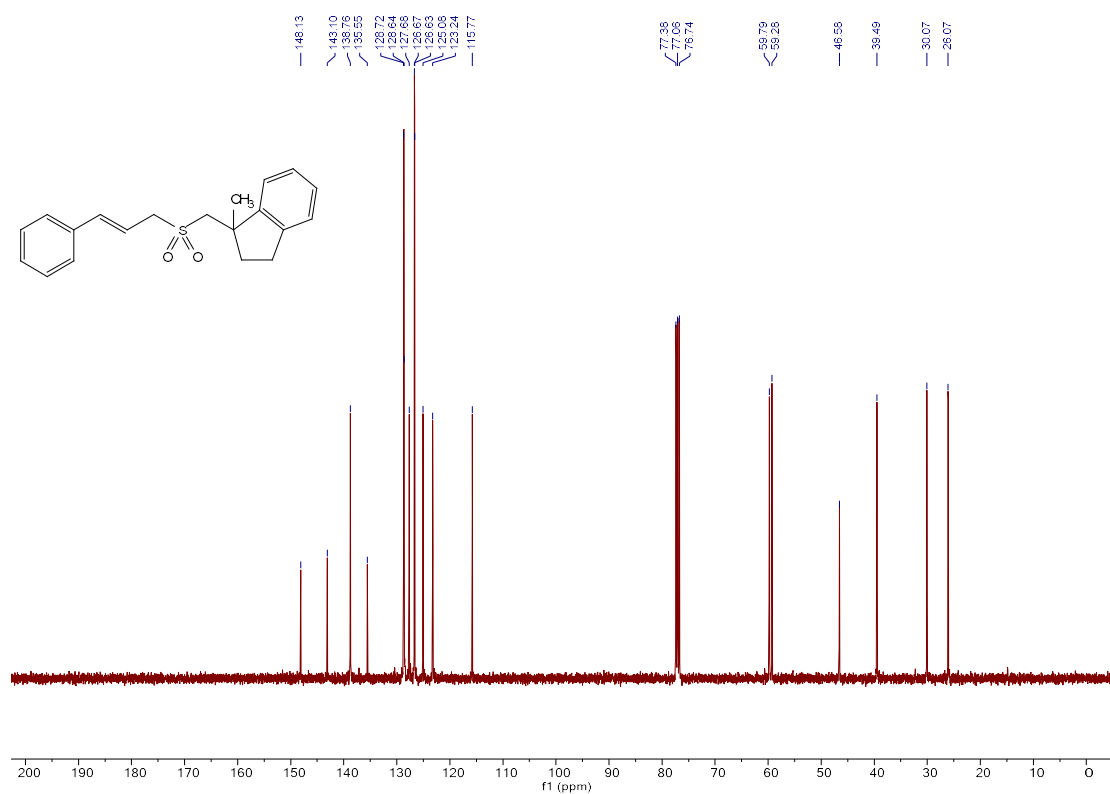

**4-((cinnamylsulfonyl)methyl)-4-methylisochromane (70).**

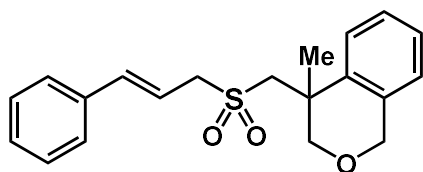

The product (56.2 mg, 82% yield) as brown oil was purified with silica gel chromatography (petroleum ether/ethyl acetate = 5/1). <sup>1</sup>H NMR (400 MHz, CDCl<sub>3</sub>) δ 7.52-7.48 (m, 1H), 7.40-7.27 (m, 7H), 7.06-7.04 (m, 1H), 6.45 (d, *J* = 16.0 Hz, 1H), 6.22-6.14 (m, 1H), 4.86 (s, 2H), 4.33 (d, *J* = 11.6 Hz, 1H), 3.72 (dd, *J* = 14.0 Hz, 7.2 Hz, 1H), 3.60-3.55 (m, 2H), 3.43 (s, 2H), 1.64 (s, 3H); <sup>13</sup>C NMR (101 MHz, CDCl<sub>3</sub>) δ 138.9, 138.8, 135.6, 133.7, 128.7, 128.6, 127.3, 127.1, 126.67, 126.65, 124.5, 115.6, 73.0, 68.6, 59.9, 58.6, 37.0, 21.6; HRMS Calculated for C<sub>20</sub>H<sub>22</sub>O<sub>3</sub>S (M+H<sup>+</sup>): 343.1362; Found: 343.1363.

<sup>1</sup>H NMR spectrum (400 MHz, CDCl<sub>3</sub>) of compound 70

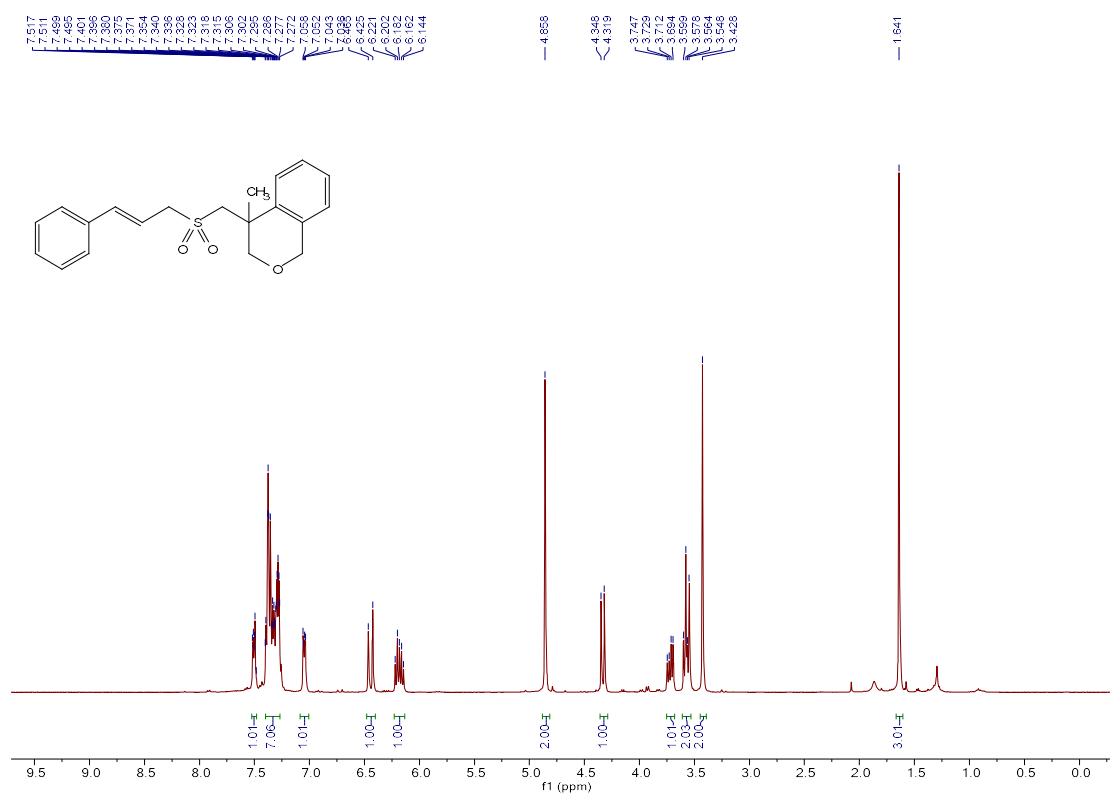

<sup>13</sup>C NMR spectrum (101 MHz, CDCl<sub>3</sub>) of compound 70

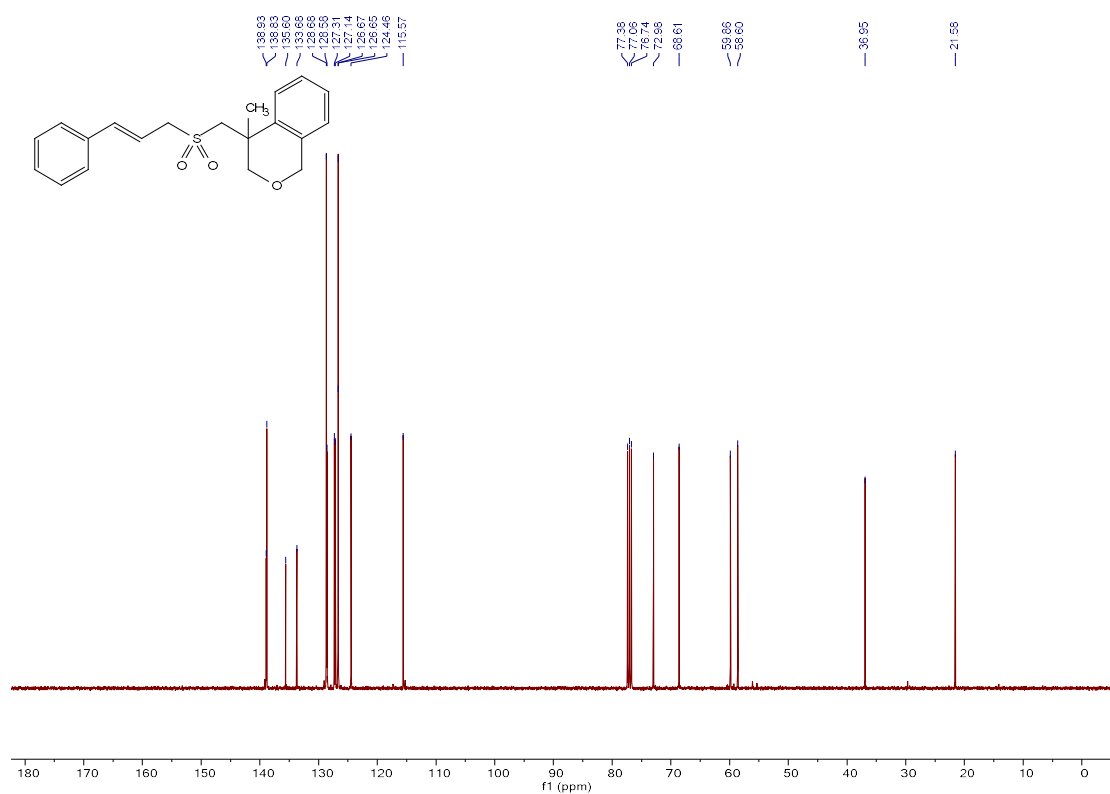

Diethyl 4-((cinnamylsulfonyl)methyl)-4-methyl-3,4-dihydronaphthalene-2,2(1*H*)-dicarboxylate (71).

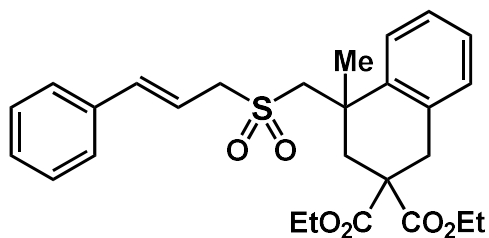

The product (69.8 mg, 72% yield) as white oil was purified with silica gel chromatography (petroleum ether/ethyl acetate = 5/1).  $^1\text{H NMR}$  (400 MHz,  $\text{CDCl}_3$ )  $\delta$  7.31-7.12 (m, 9H), 6.39 (d,  $J = 16.0$  Hz, 1H), 6.07-6.00 (m, 1H), 4.12-3.95 (m, 4H), 3.39-3.34 (m, 1H), 3.30-3.18 (m, 4H), 3.11 (d,  $J = 16.0$  Hz, 1H), 2.90 (d,  $J = 14.4$  Hz, 1H), 2.38 (d,  $J = 14.8$  Hz, 1H), 1.56 (s, 3H), 1.15-1.06 (m, 6H);  $^{13}\text{C NMR}$  (101 MHz,  $\text{CDCl}_3$ )  $\delta$  171.6, 171.1, 139.4, 138.8, 135.6, 134.3, 129.4, 128.7, 128.6, 127.4, 127.1, 126.7, 126.4, 115.5, 61.9, 61.8, 61.5, 59.8, 53.0, 40.1, 37.4, 34.9, 29.6, 13.9, 13.9; HRMS Calculated for  $\text{C}_{27}\text{H}_{32}\text{O}_6\text{S}$  ( $\text{M}+\text{H}^+$ ): 485.1992; Found: 485.2000.

$^1\text{H NMR}$  spectrum (400 MHz,  $\text{CDCl}_3$ ) of compound 71

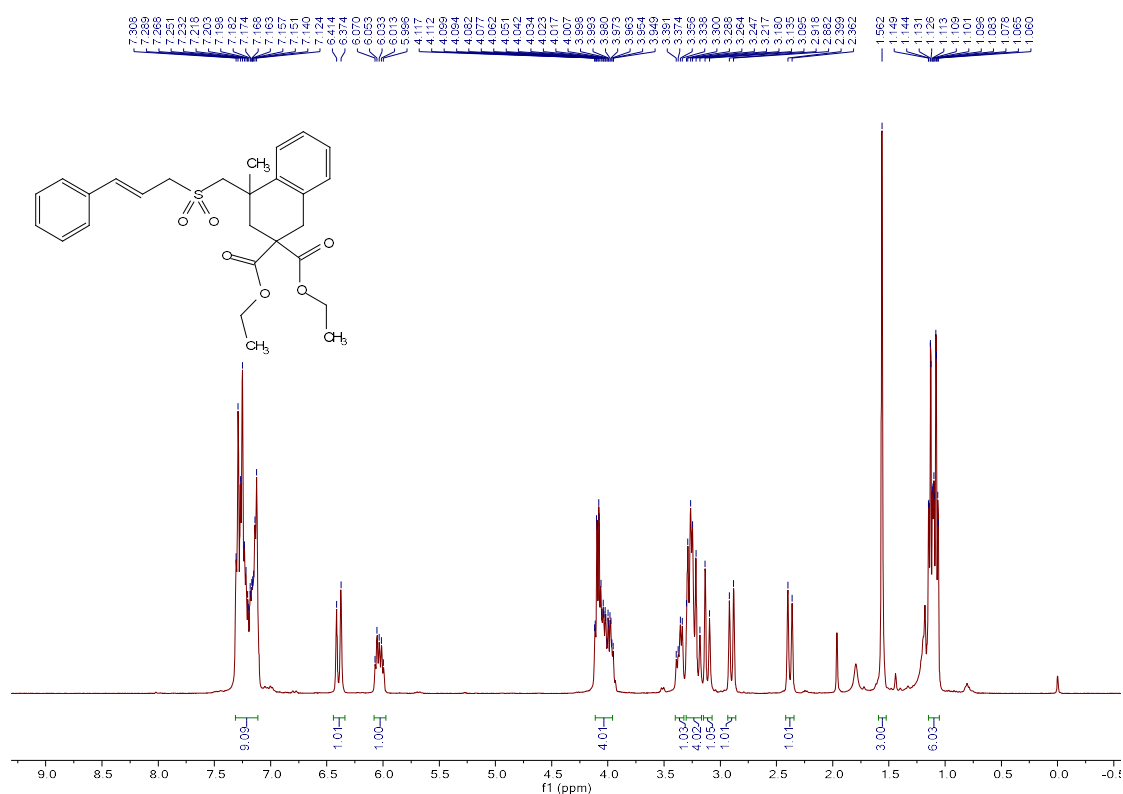

<sup>13</sup>C NMR spectrum (101 MHz, CDCl<sub>3</sub>) of compound 71

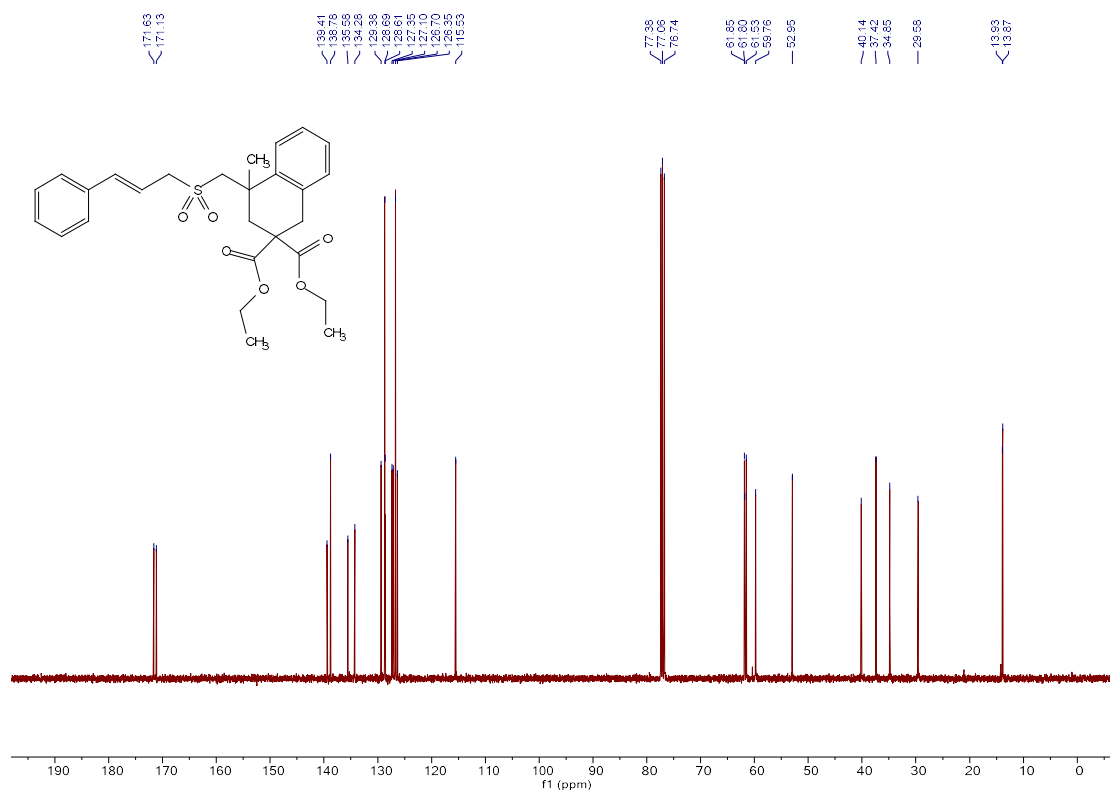

11-(cinnamylsulfonyl)-10b-methyl-10b,11-dihydro-6H-isoindolo[2,1-a]indol-6-one (72).

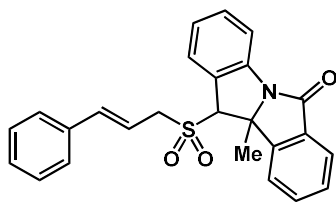

The product (33.2 mg, 40% yield) as white solid was purified with silica gel chromatography (petroleum ether/ethyl acetate = 1/1). <sup>1</sup>H NMR (400 MHz, CDCl<sub>3</sub>) δ 7.92 (d, *J* = 7.6 Hz, 1H), 7.85 (d, *J* = 7.6 Hz, 1H), 7.78-7.71 (m, 3H), 7.63-7.59 (m, 1H), 7.38-7.33 (m, 1H), 7.24-7.16 (m, 4H), 7.14-7.11 (m, 2H), 6.04 (d, *J* = 16.0 Hz, 1H), 5.53-5.45 (m, 1H), 4.54 (s, 1H), 2.89-2.76 (m, 2H), 1.75 (s, 3H); <sup>13</sup>C NMR (151 MHz, CDCl<sub>3</sub>) δ 166.6, 145.4, 139.6, 138.9, 135.4, 133.0, 132.9, 131.4, 129.8, 128.7, 128.4, 128.3, 127.2, 126.8, 126.7, 125.2, 124.6, 117.3, 112.5, 73.3, 72.5, 55.0, 30.2; HRMS Calculated for C<sub>25</sub>H<sub>21</sub>NO<sub>3</sub>S (M+Na<sup>+</sup>): 438.1134; Found: 438.1136.

<sup>1</sup>H NMR spectrum (400 MHz, CDCl<sub>3</sub>) of compound 72

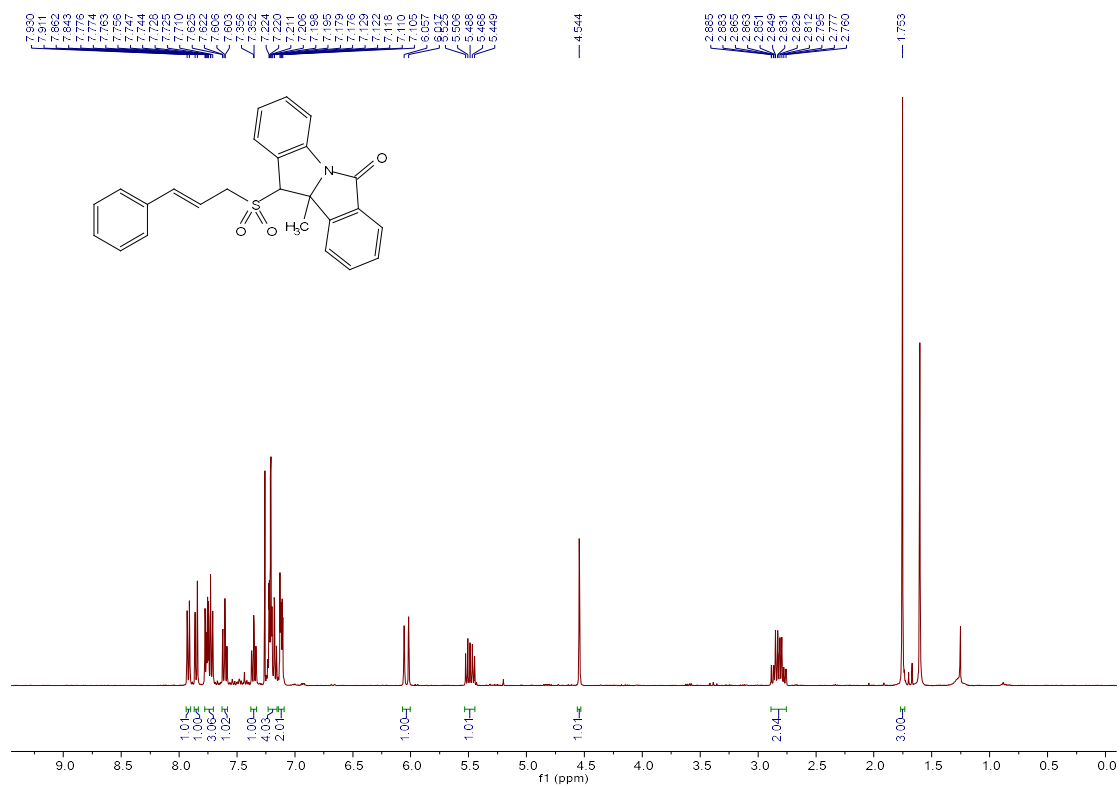

<sup>13</sup>C NMR spectrum (151 MHz, CDCl<sub>3</sub>) of compound 72

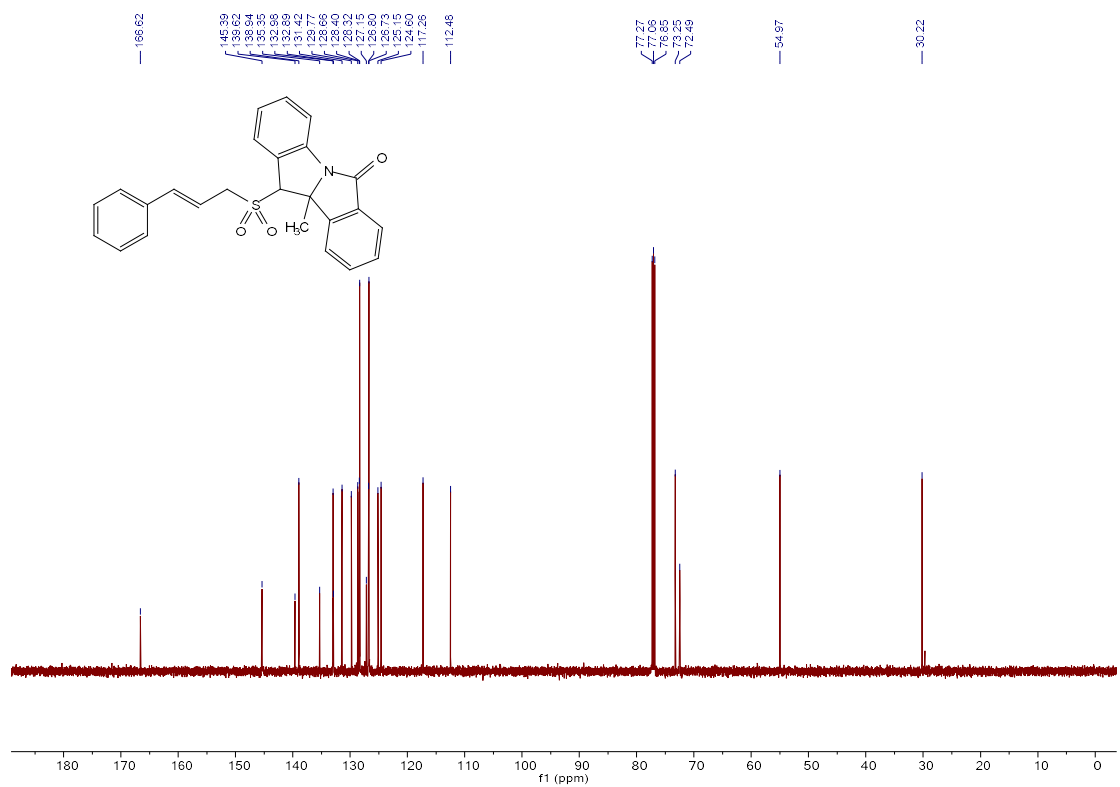

**(E)-1-benzyl-3-methyl-3-(((3-(p-tolyl)allyl)sulfonyl)methyl)indolin-2-one (73).**

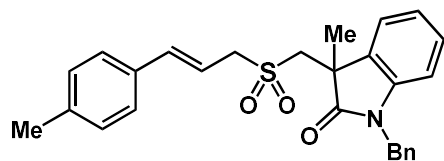

The product (74.0 mg, 83% yield) as brown solid was purified with silica gel chromatography (petroleum ether/ethyl acetate = 2/1). **<sup>1</sup>H NMR (400 MHz, CDCl<sub>3</sub>)** δ 7.29-7.19 (m, 7H), 7.17-7.09 (m, 2H), 7.06-7.05 (m, 2H), 6.98 (t, *J* = 7.2 Hz, 1H), 6.66 (d, *J* = 8.0 Hz, 1H), 6.53 (d, *J* = 15.6 Hz, 1H), 6.05-5.98 (m, 1H), 4.96 (d, *J* = 16.0 Hz, 1H), 4.79 (d, *J* = 15.6 Hz, 1H), 3.66-3.58 (m, 2H), 3.50-3.45 (m, 2H), 2.25 (s, 3H), 1.40 (s, 3H); **<sup>13</sup>C NMR (101 MHz, CDCl<sub>3</sub>)** δ 178.0, 142.4, 139.0, 138.7, 135.6, 132.8, 130.5, 129.4, 128.8, 128.7, 127.5, 127.2, 126.7, 123.5, 122.6, 114.0, 109.8, 59.6, 56.6, 45.6, 44.2, 25.6, 21.2; **HRMS** Calculated for C<sub>27</sub>H<sub>27</sub>NO<sub>3</sub>S (M+H<sup>+</sup>): 446.1784; Found: 446.1787.

**<sup>1</sup>H NMR spectrum (400 MHz, CDCl<sub>3</sub>) of compound 73**

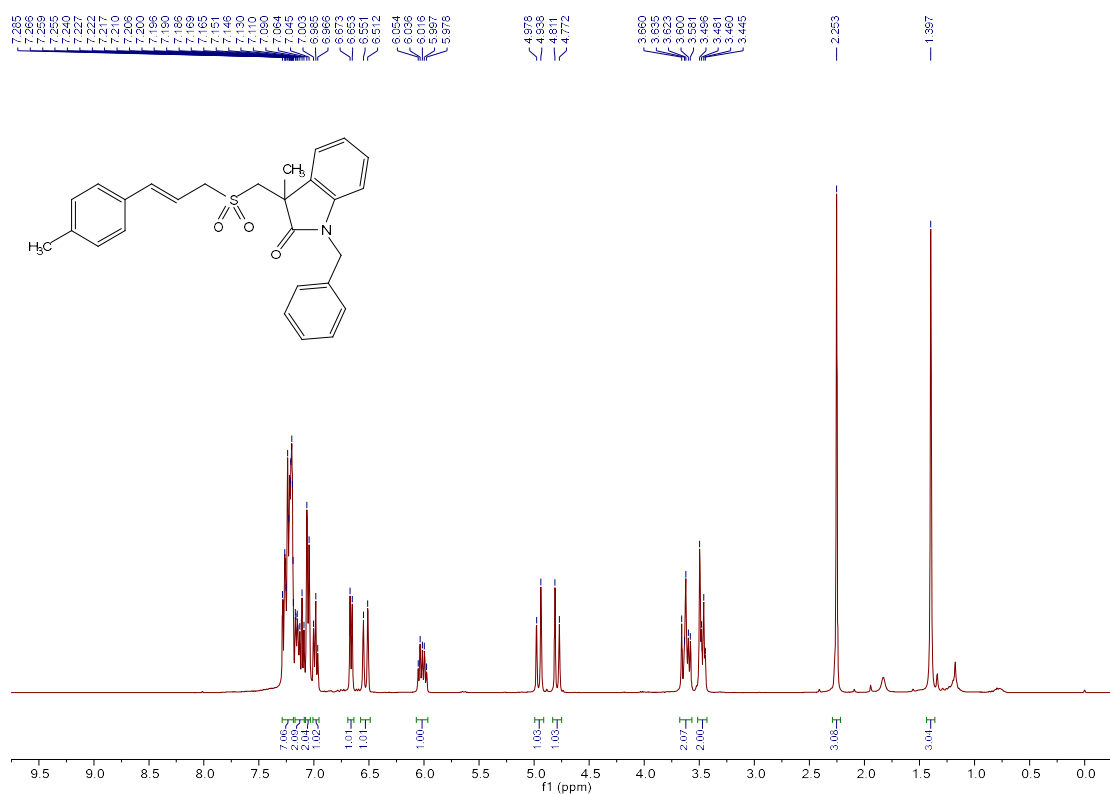





<sup>1</sup>H NMR spectrum (400 MHz, CDCl<sub>3</sub>) of compound 74

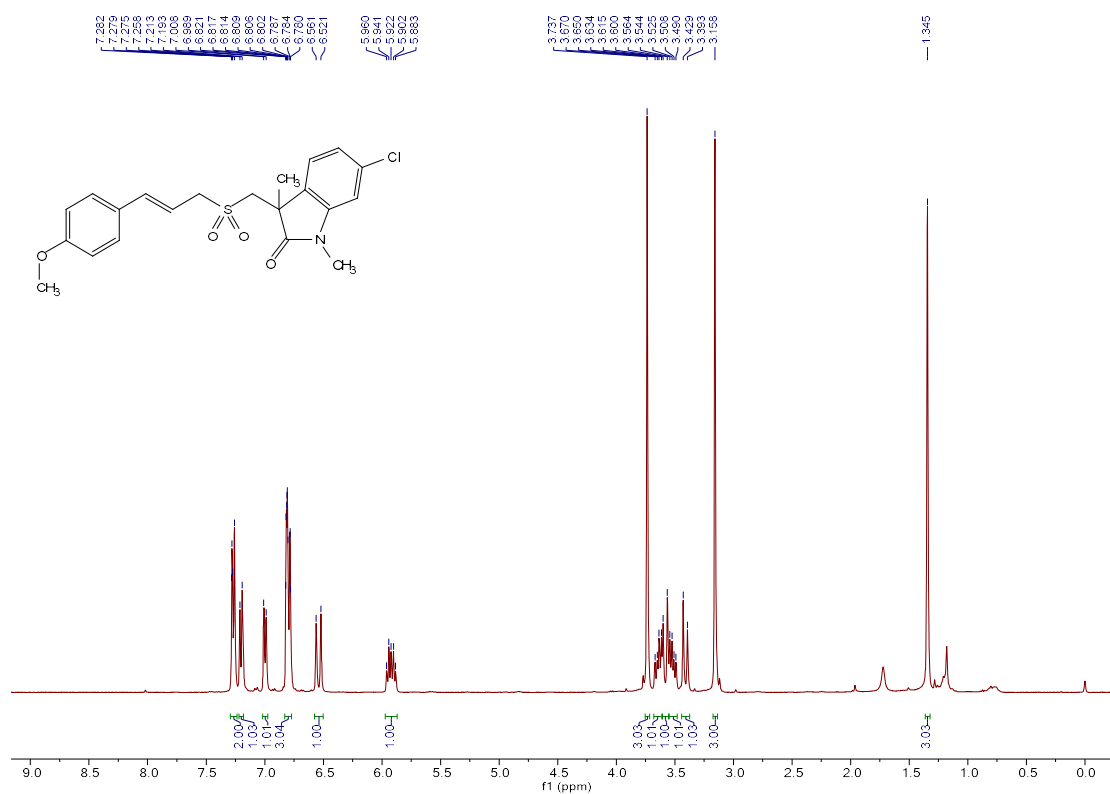

<sup>13</sup>C NMR spectrum (101 MHz, CDCl<sub>3</sub>) of compound 74

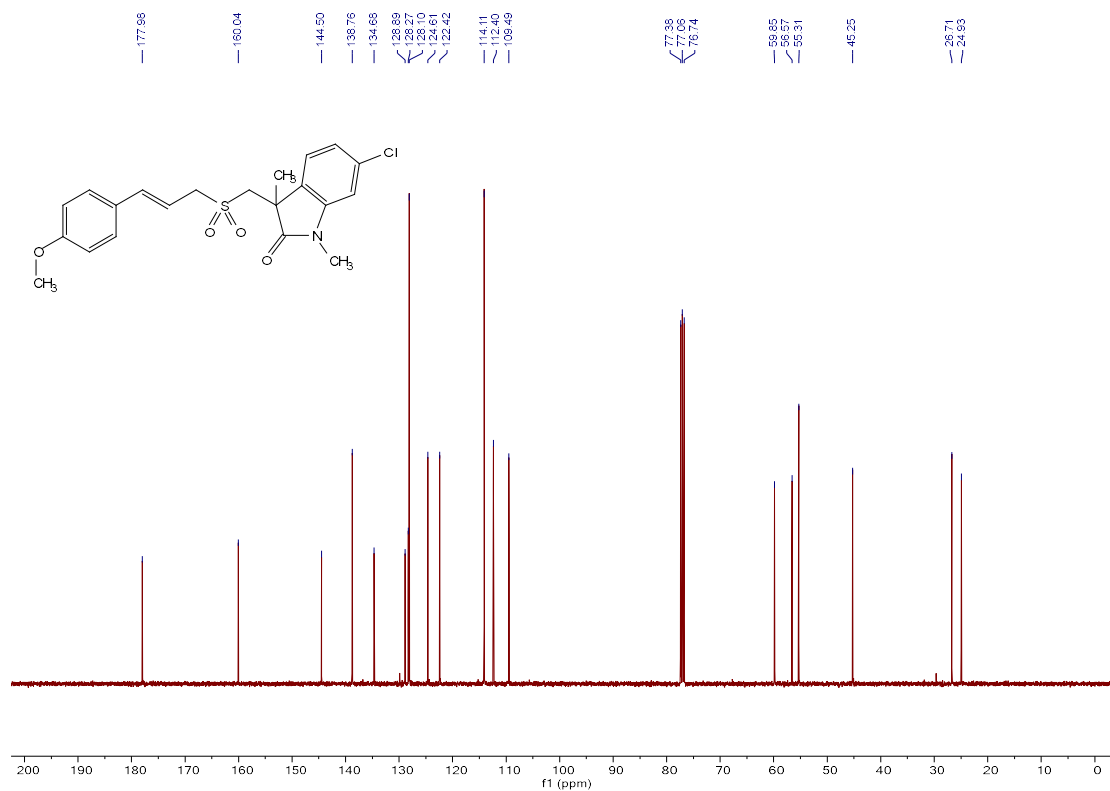

(*E*)-3-(((3-(benzo[*d*][1,3]dioxol-5-yl)allyl)sulfonyl)methyl)-1-ethyl-5-methoxy-3-methylindolin-2-one (75).

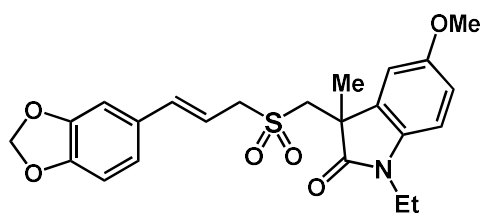

The product (67.4 mg, 76% yield) as yellow solid was purified with silica gel chromatography (petroleum ether/ethyl acetate = 2/1). <sup>1</sup>H NMR (400 MHz, CDCl<sub>3</sub>) δ 6.99 (s, 1H), 6.94 (s, 1H), 6.86-6.80 (m, 3H), 6.76 (d, *J* = 8.0 Hz, 1H), 6.57 (d, *J* = 16.0 Hz, 1H), 6.01-5.94 (m, 3H), 3.86-3.79 (m, 4H), 3.75-3.67 (m, 2H), 3.63 (d, *J* = 14.8 Hz, 1H), 3.52 (dd, *J* = 14.0 Hz, 7.2 Hz, 1H), 3.46 (d, *J* = 14.8 Hz, 1H), 1.42 (s, 3H), 1.27 (t, *J* = 7.6 Hz, 3H); <sup>13</sup>C NMR (101 MHz, CDCl<sub>3</sub>) δ 177.1, 155.8, 148.2, 148.1, 138.7, 135.7, 132.2, 130.1, 121.9, 113.2, 112.8, 111.5, 109.2, 108.3, 105.8, 101.3, 59.5, 56.7, 55.8, 45.9, 35.0, 25.2, 12.3; HRMS Calculated for C<sub>23</sub>H<sub>25</sub>NO<sub>6</sub>S (M+H<sup>+</sup>): 444.1475; Found: 444.1477.

<sup>1</sup>H NMR spectrum (400 MHz, CDCl<sub>3</sub>) of compound 75

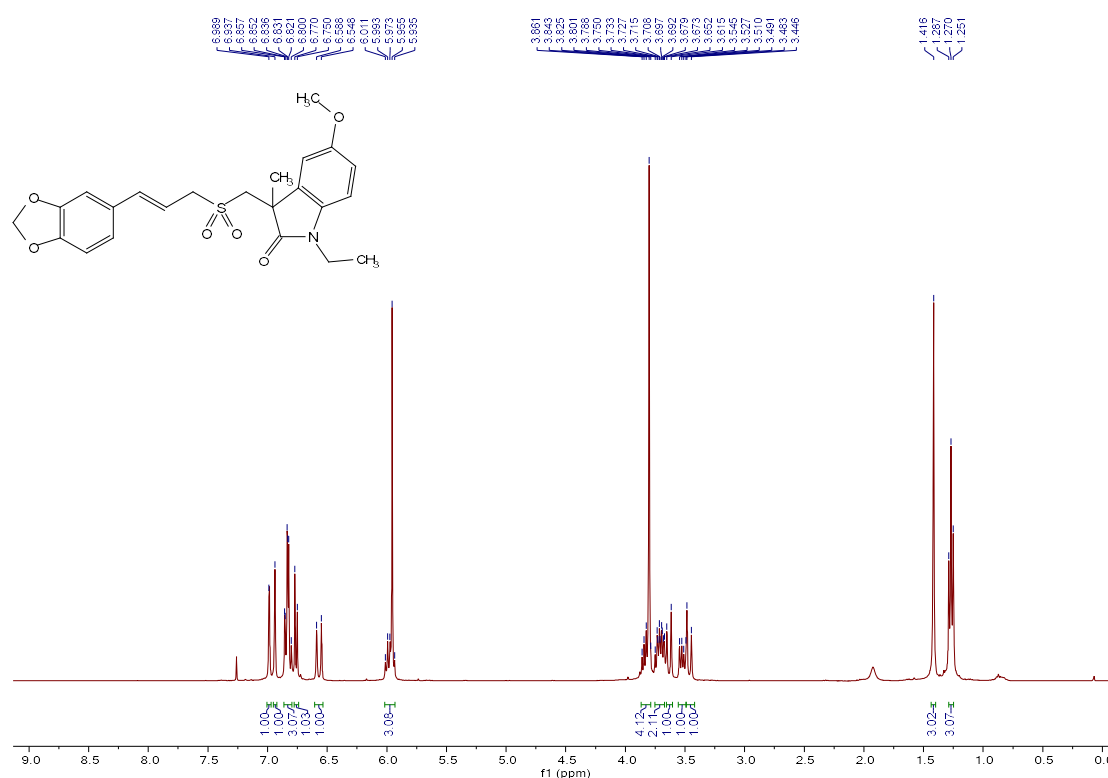

<sup>13</sup>C NMR spectrum (101 MHz, CDCl<sub>3</sub>) of compound **75**

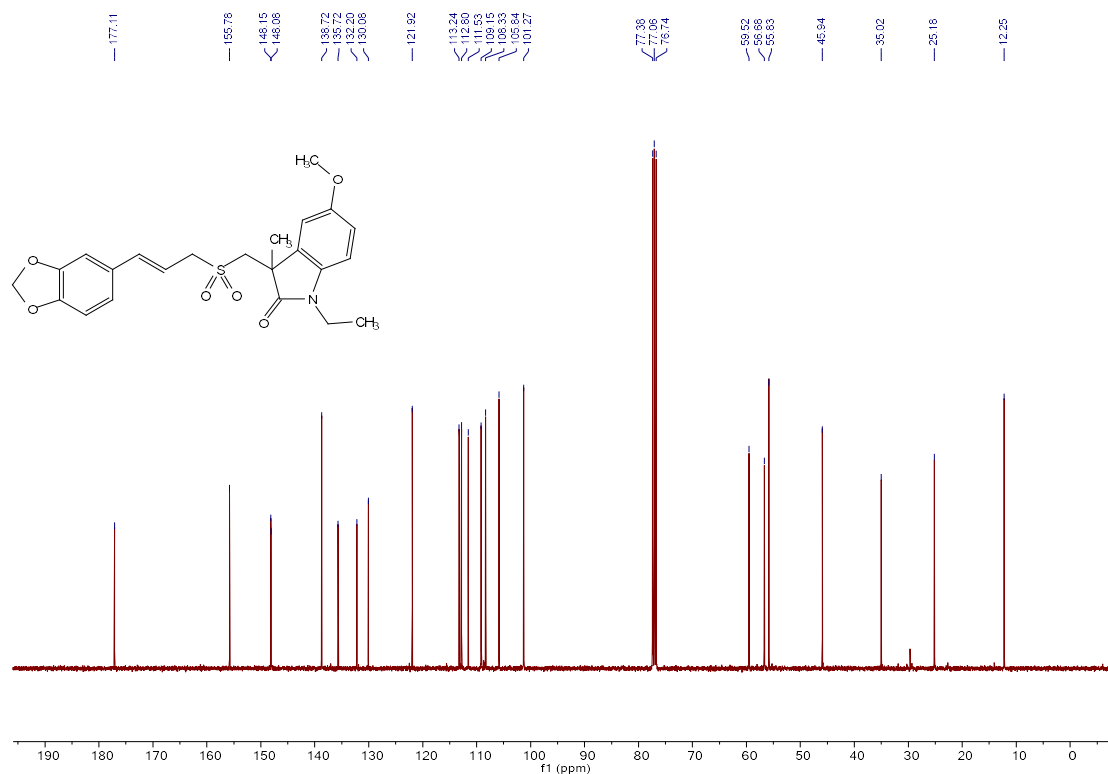

***(E)*-1-(3,5-dimethylbenzyl)-3-(((3-(4-fluorophenyl)allyl)sulfonyl)methyl)-5-methoxy-3-methylindolin-2-one (76).**

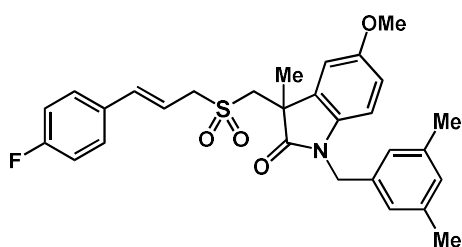

The product (73.1 mg, 72% yield) as brown solid was purified with silica gel chromatography (petroleum ether/ethyl acetate = 2/1). <sup>1</sup>H NMR (400 MHz, CDCl<sub>3</sub>) δ 7.31-7.27 (m, 2H), 6.96-6.91 (m, 3H), 6.85 (s, 2H), 6.79 (s, 1H), 6.65 (d, *J* = 8.4 Hz, 1H), 6.61-6.53 (m, 2H), 6.04-5.97 (m, 1H), 4.85 (d, *J* = 15.6 Hz, 1H), 4.70 (d, *J* = 15.6 Hz, 1H), 3.70-3.62 (m, 5H), 3.53-3.43 (m, 2H), 2.17 (s, 6H), 1.42 (s, 3H); <sup>19</sup>F NMR (376 MHz, CDCl<sub>3</sub>) δ -112.53 (s, 1F); <sup>13</sup>C NMR (101 MHz, CDCl<sub>3</sub>) δ 177.7, 164.1, 161.6, 156.0, 138.3, 138.0, 135.8, 135.6, 132.0, 131.9 (d, *J* = 3.0 Hz), 129.2, 128.4 (d, *J* = 8.1 Hz), 125.0, 115.8, 115.6, 114.9 (d, *J* = 2.0 Hz), 112.8, 111.2, 110.2, 59.4, 56.8, 55.7, 46.2, 44.2, 25.7, 21.3; HRMS Calculated for C<sub>29</sub>H<sub>30</sub>FNO<sub>4</sub>S (M+H<sup>+</sup>): 508.1952; Found: 508.1956.

**<sup>1</sup>H NMR spectrum (400 MHz, CDCl<sub>3</sub>) of compound 76**

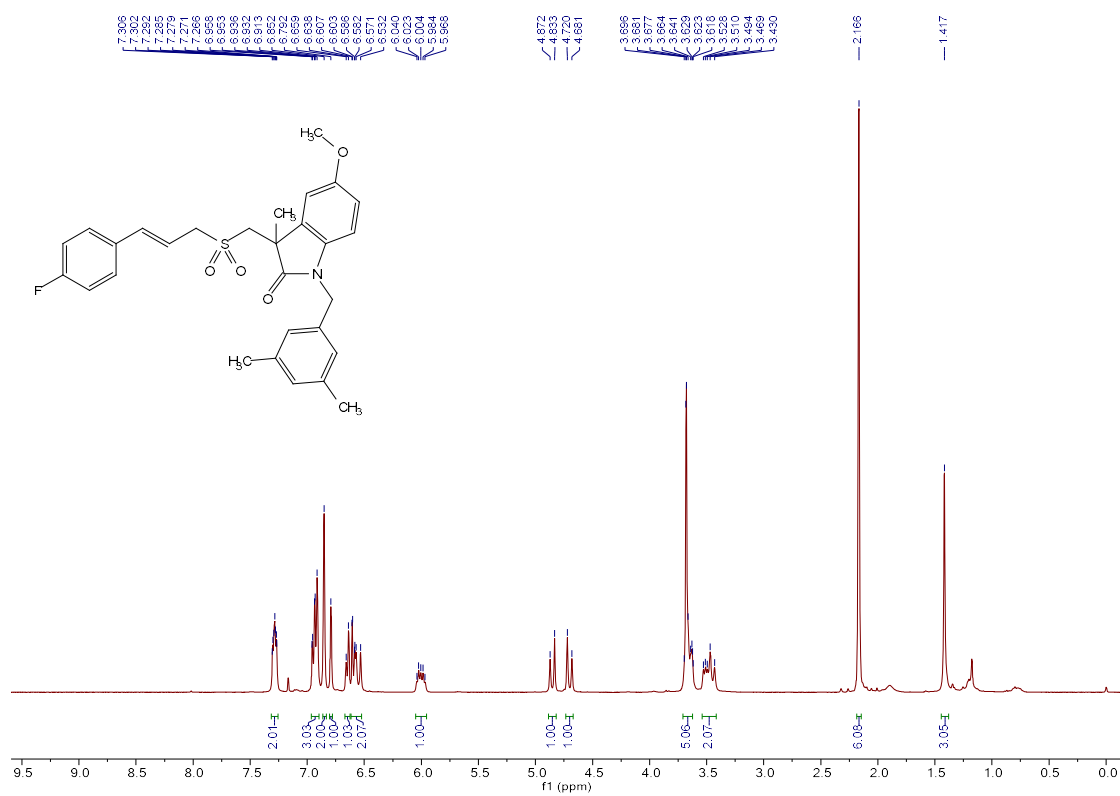

**<sup>19</sup>F NMR spectrum (376 MHz, CDCl<sub>3</sub>) of compound 76**

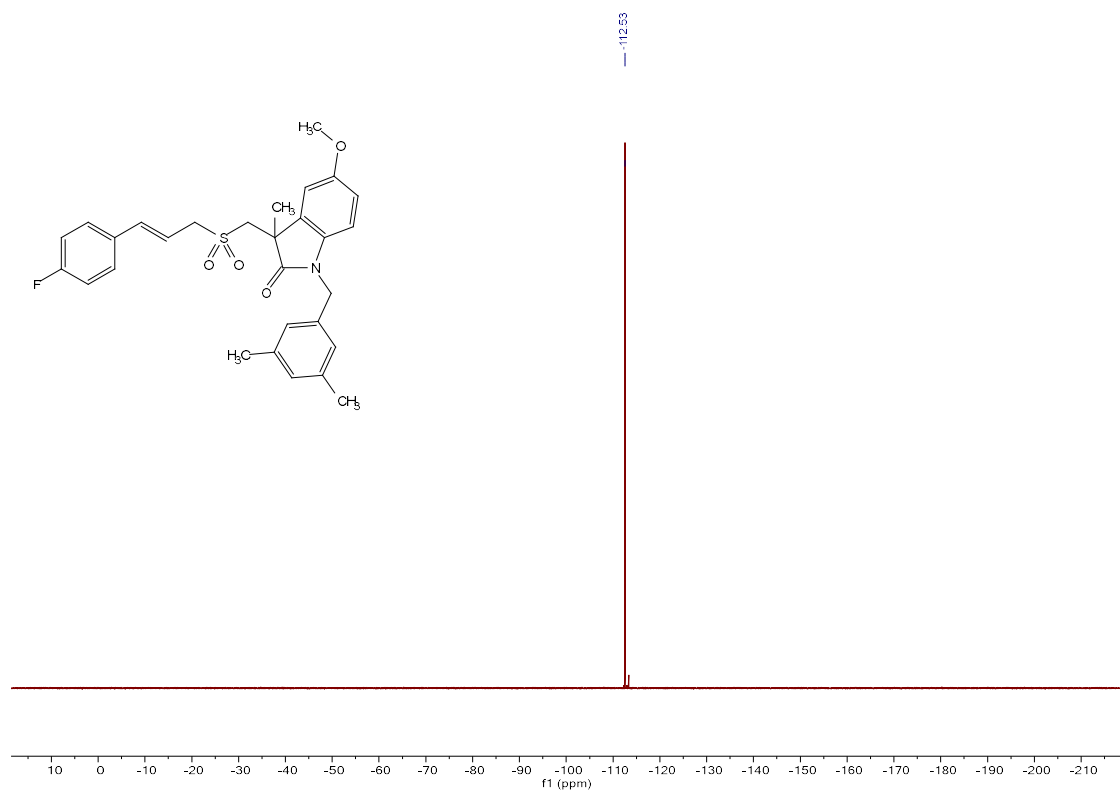

<sup>13</sup>C NMR spectrum (101 MHz, CDCl<sub>3</sub>) of compound 76

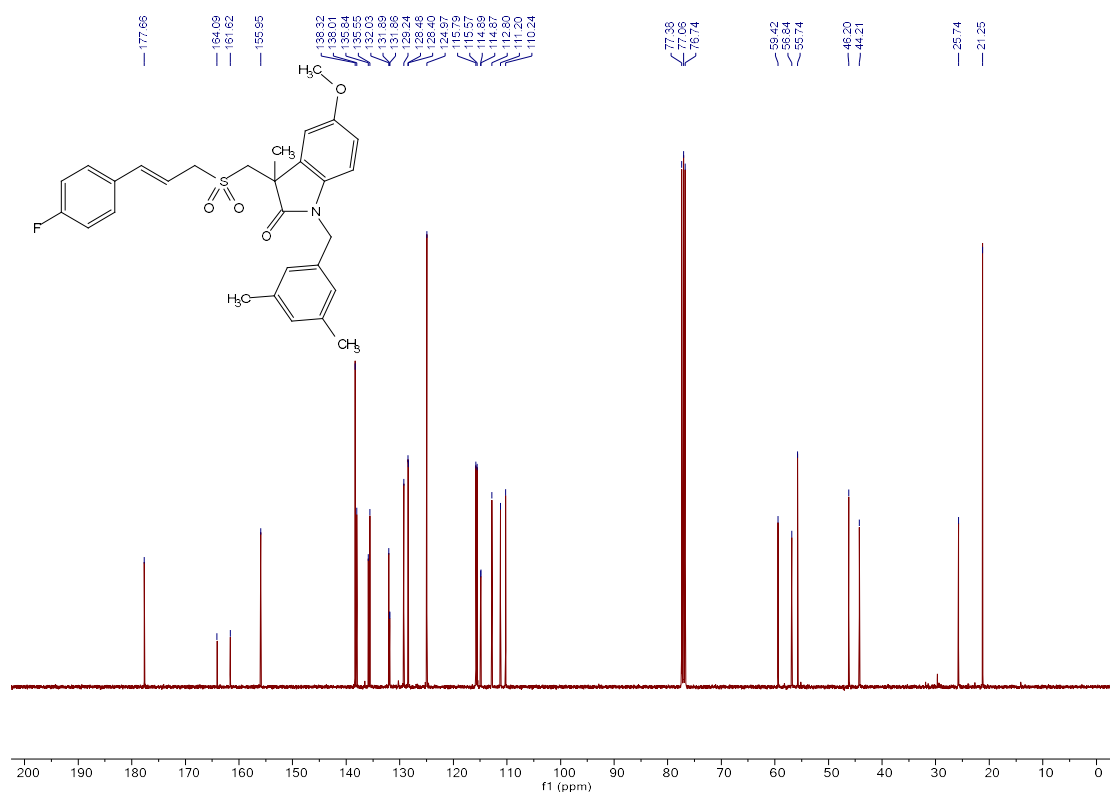

**(E)-1-(4-(tert-butyl)benzyl)-3-(((3-(4-chlorophenyl)allyl)sulfonyl)methyl)-5-methoxy-3-methylindolin-2-one (77).**

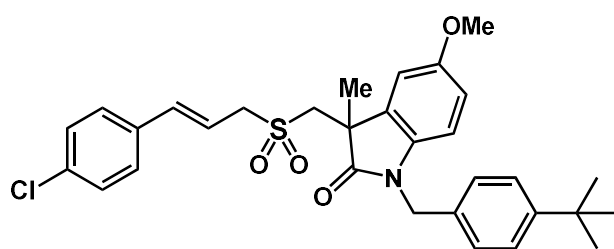

The product (82.8 mg, 75% yield) as yellow solid was purified with silica gel chromatography (petroleum ether/ethyl acetate = 2/1). <sup>1</sup>H NMR (400 MHz, CDCl<sub>3</sub>) δ 7.26-7.15 (m, 8H), 6.91 (s, 1H), 6.66-6.54 (m, 3H), 6.11-6.04 (m, 1H), 4.89 (d, *J* = 15.6 Hz, 1H), 4.76 (d, *J* = 15.6 Hz, 1H), 3.71-3.61 (m, 5H), 3.57-3.51 (m, 1H), 3.45 (d, *J* = 14.4 Hz, 1H), 1.41 (s, 3H), 1.19 (s, 9H); <sup>13</sup>C NMR (101 MHz, CDCl<sub>3</sub>) δ 177.6, 156.0, 150.5, 138.0, 135.8, 134.4, 134.1, 132.6, 132.0, 128.9, 128.0, 126.9, 125.7, 115.9, 112.8, 111.3, 110.3, 59.4, 56.9, 55.8, 46.2, 43.9, 34.5, 31.3, 25.7; HRMS Calculated for C<sub>31</sub>H<sub>34</sub>ClNO<sub>4</sub>S (M+H<sup>+</sup>): 552.1970; Found: 552.1975.

<sup>1</sup>H NMR spectrum (400 MHz, CDCl<sub>3</sub>) of compound 77

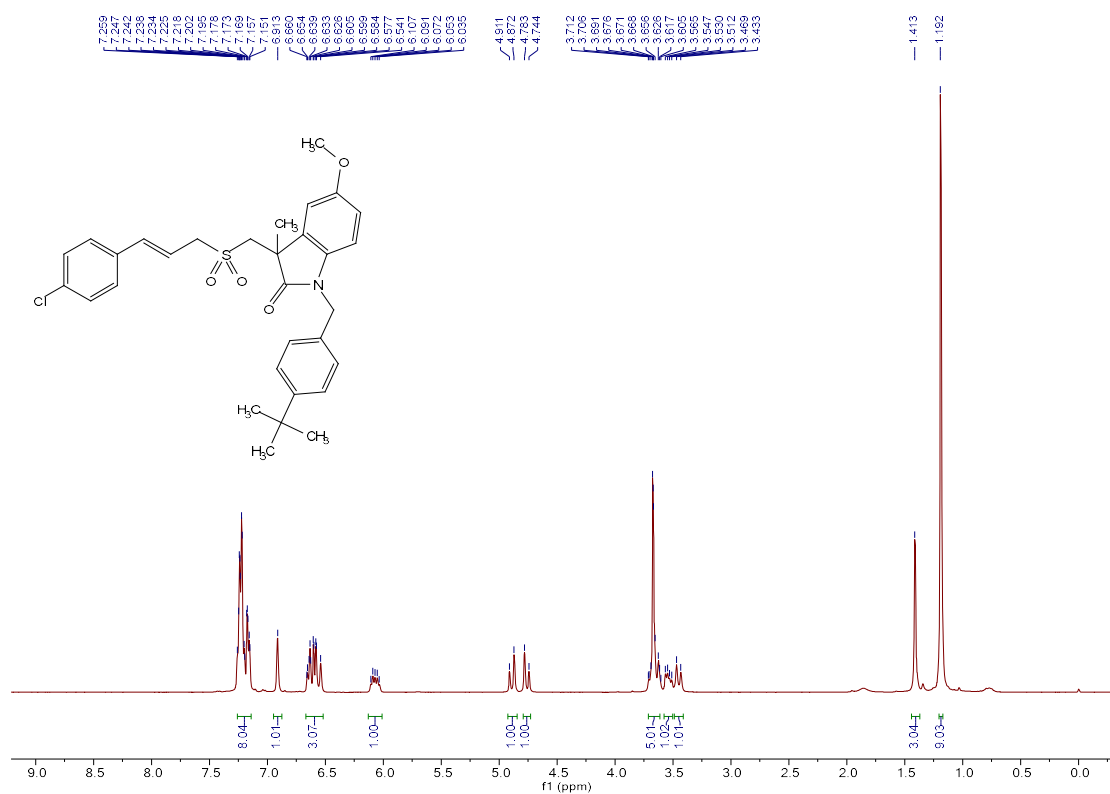

<sup>13</sup>C NMR spectrum (101 MHz, CDCl<sub>3</sub>) of compound 77

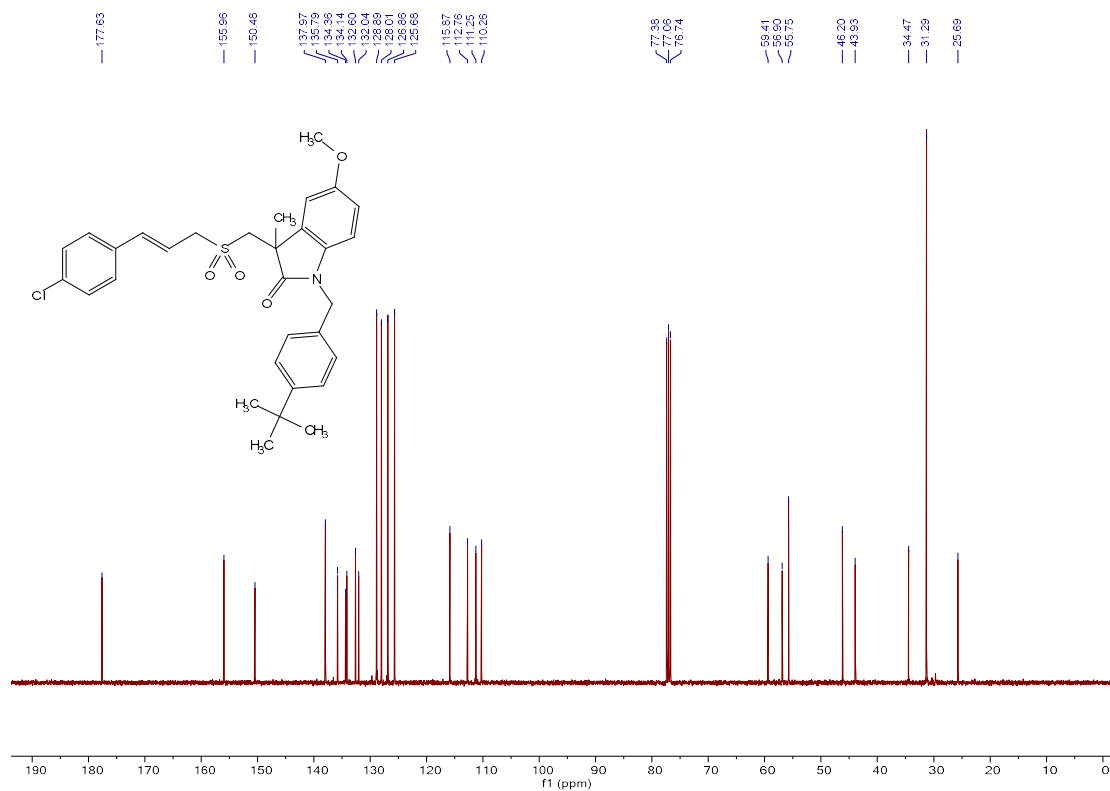

(*E*)-2-(3-(((3-(4-bromophenyl)allyl)sulfonyl)methyl)-5-methoxy-3-methyl-2-oxindolin-1-yl)acetate (78).

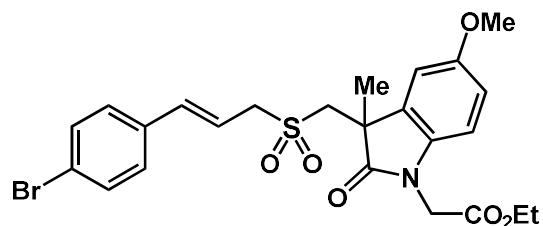

The product (75.1 mg, 70% yield) as yellow solid was purified with silica gel chromatography (petroleum ether/ethyl acetate = 2/1).  $^1\text{H NMR}$  (400 MHz,  $\text{CDCl}_3$ )  $\delta$  7.38 (d,  $J = 8.4$  Hz, 2H), 7.19 (d,  $J = 8.4$  Hz, 2H), 6.95 (d,  $J = 2.0$  Hz, 1H), 6.75 (dd,  $J = 8.4$  Hz, 2.0 Hz, 1H), 6.63 (d,  $J = 8.4$  Hz, 1H), 6.54 (d,  $J = 15.6$  Hz, 1H), 6.12-6.04 (m, 1H), 4.57 (d,  $J = 17.6$  Hz, 1H), 4.22 (d,  $J = 17.6$  Hz, 1H), 4.13 (q,  $J = 7.2$  Hz, 2H), 3.72 (s, 3H), 3.67 (dd,  $J = 14.0$  Hz, 7.6 Hz, 1H), 3.58 (d,  $J = 15.2$  Hz, 1H), 3.53 (dd,  $J = 14.0$  Hz, 7.6 Hz, 1H), 3.43 (d,  $J = 14.8$  Hz, 1H), 1.43 (s, 3H), 1.18 (t,  $J = 7.2$  Hz, 3H);  $^{13}\text{C NMR}$  (101 MHz,  $\text{CDCl}_3$ )  $\delta$  177.6, 167.5, 156.2, 138.1, 135.2, 134.6, 131.8, 131.6, 128.3, 122.6, 115.9, 113.0, 111.6, 109.1, 61.8, 59.3, 56.9, 55.8, 46.2, 41.7, 25.2, 14.1; HRMS Calculated for  $\text{C}_{24}\text{H}_{26}\text{BrNO}_6\text{S}$  ( $\text{M}+\text{H}^+$ ): 536.0737; Found: 536.0743.

$^1\text{H NMR}$  spectrum (400 MHz,  $\text{CDCl}_3$ ) of compound 78

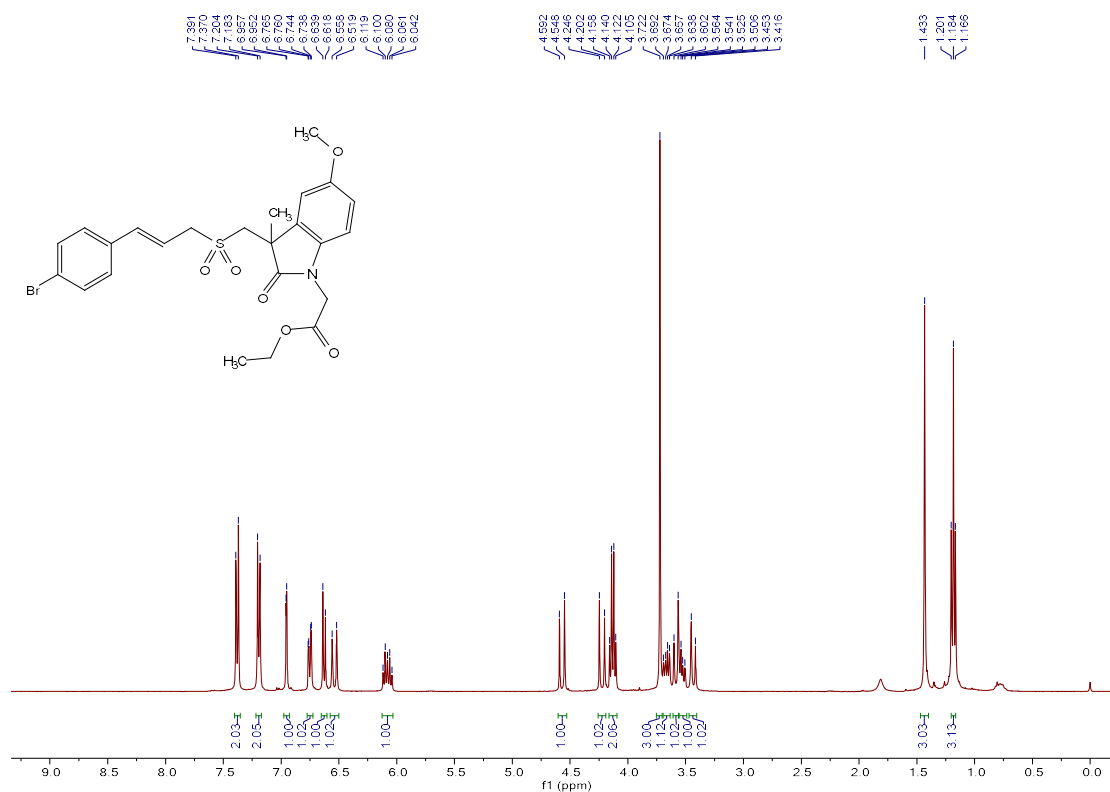



<sup>13</sup>C NMR spectrum (101 MHz, CDCl<sub>3</sub>) of compound **78**

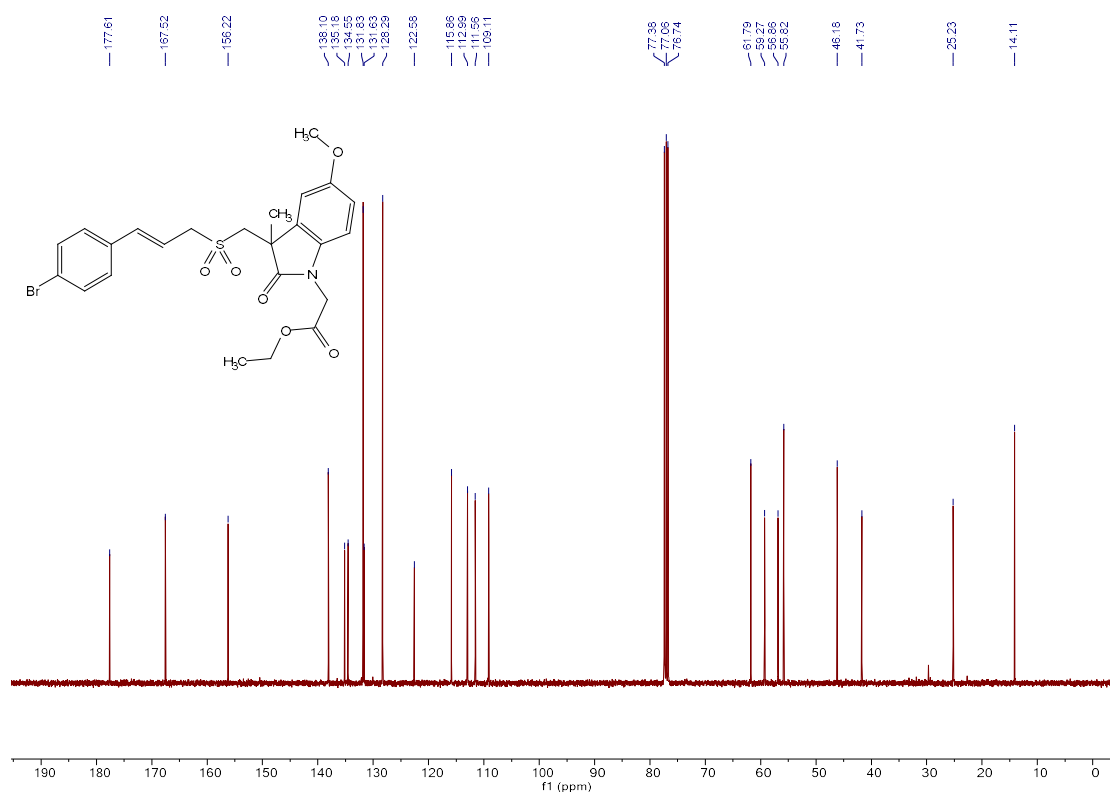

**(E)-3-cyclohexyl-3-(((3-(furan-2-yl)allyl)sulfonyl)methyl)-5-methoxy-1-methylindolin-2-one (79).**

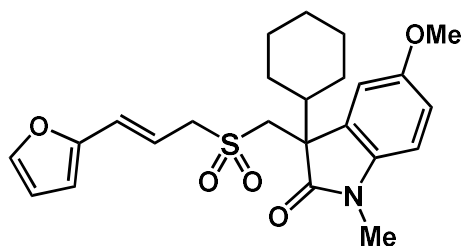

The product (48.8 mg, 55% yield) as brown oil was purified with silica gel chromatography (petroleum ether/ethyl acetate = 2/1). <sup>1</sup>H NMR (400 MHz, CDCl<sub>3</sub>) δ 7.37 (s, 1H), 6.89-6.84 (m, 2H), 6.77 (d, *J* = 8.4 Hz, 1H), 6.51 (d, *J* = 16.0 Hz, 1H), 6.39-6.38 (m, 1H), 6.34 (d, *J* = 3.2 Hz, 1H), 6.09-6.02 (m, 1H), 3.81 (s, 3H), 3.71-3.64 (m, 2H), 3.59 (d, *J* = 14.4 Hz, 1H), 3.41 (dd, *J* = 14.4, 7.2 Hz, 1H), 3.21 (s, 3H), 1.80-1.71 (m, 2H), 1.63-1.54 (m, 3H), 1.29-1.25 (m, 1H), 1.19-1.11 (m, 3H), 1.03-0.96 (m, 1H), 0.78-0.74 (m, 1H); <sup>13</sup>C NMR (101 MHz, CDCl<sub>3</sub>) δ 177.1, 155.5, 151.4, 142.9, 138.2, 129.4, 126.9, 113.5, 112.5, 112.3, 111.5, 110.0, 108.5, 59.3, 55.8, 55.6, 53.3, 46.1, 26.7, 26.5, 26.3, 26.0, 25.8; HRMS Calculated for C<sub>24</sub>H<sub>29</sub>NO<sub>5</sub>S (M+H<sup>+</sup>): 444.1839; Found: 444.1841.

**<sup>1</sup>H NMR spectrum (400 MHz, CDCl<sub>3</sub>) of compound 79**

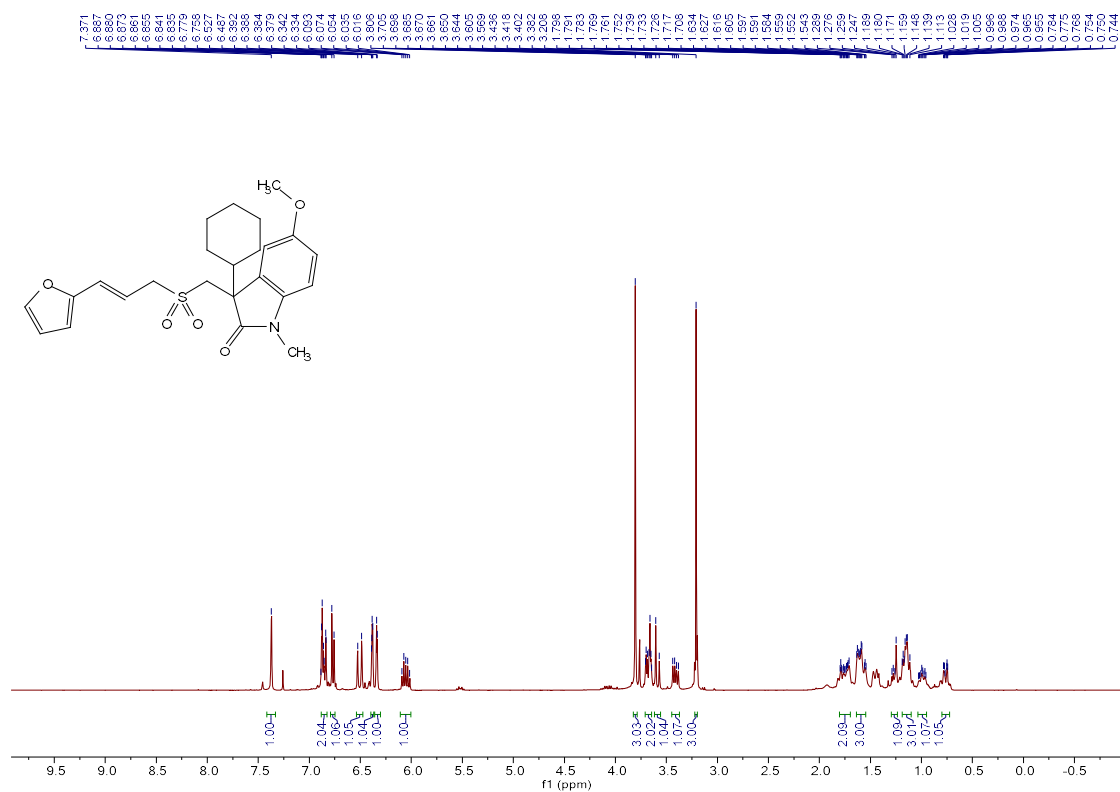

**<sup>13</sup>C NMR spectrum (101 MHz, CDCl<sub>3</sub>) of compound 79**

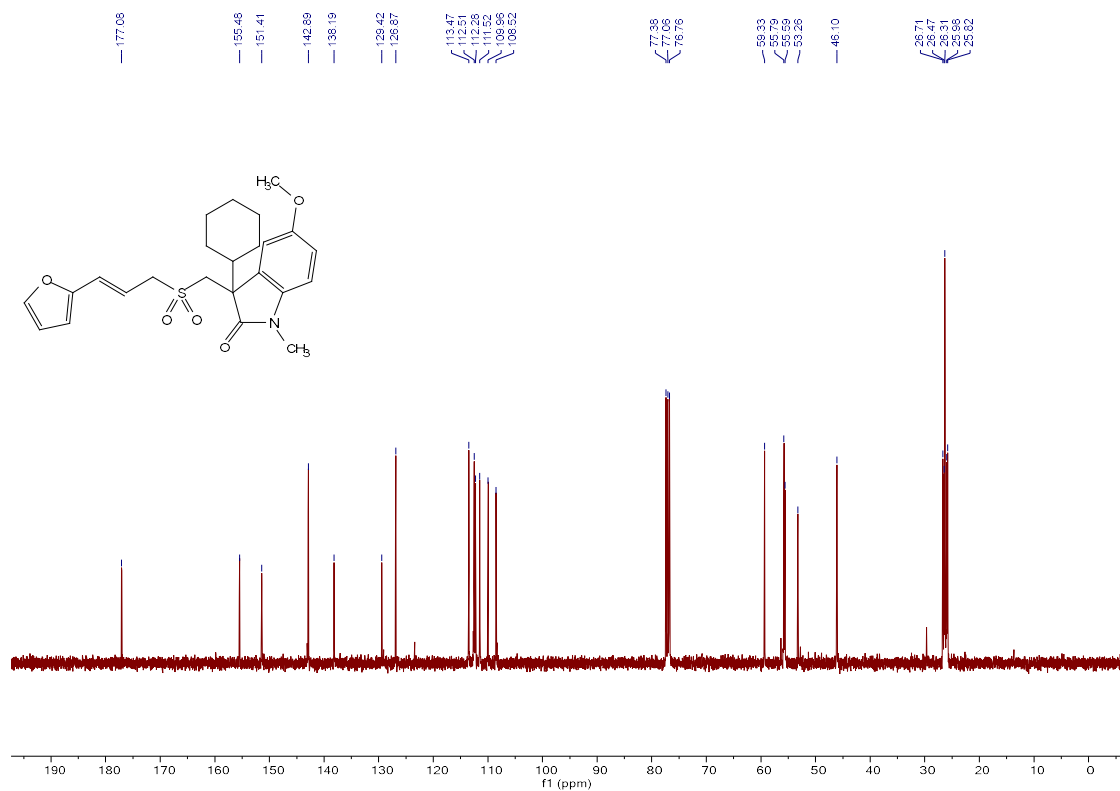

**methyl (E)-3-(((3-(3-(4-fluorophenyl)-1-isopropyl-1H-indol-2-yl)allyl)sulfonyl)methyl)-1,3-dimethyl-2-oxoindoline-6-carboxylate (80).**

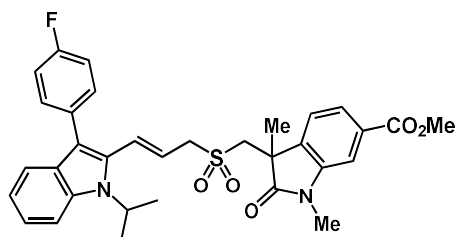

The product (83.6 mg, 71% yield) as brown solid was purified with silica gel chromatography (petroleum ether/ethyl acetate = 1/1). **<sup>1</sup>H NMR (400 MHz, CDCl<sub>3</sub>)** δ 7.72 (d, *J* = 7.6 Hz, 1H), 7.47-7.44 (m, 2H), 7.39 (d, *J* = 8.0 Hz, 1H), 7.35-7.31 (m, 2H), 7.21 (d, *J* = 6.8 Hz, 1H), 7.13 (t, *J* = 8.0 Hz, 1H), 7.08-6.98 (m, 3H), 6.69 (d, *J* = 16.0 Hz, 1H), 5.61-5.53 (m, 1H), 4.77-4.70 (m, 1H), 3.84 (s, 3H), 3.55 (dd, *J* = 13.6 Hz, 7.6 Hz, 1H), 3.41-3.32 (m, 2H), 3.20-3.12 (m, 4H), 1.57 (d, *J* = 6.8 Hz, 6H), 1.31 (s, 3H); **<sup>19</sup>F NMR (376 MHz, CDCl<sub>3</sub>)** δ -115.87 (s, 1F); **<sup>13</sup>C NMR (101 MHz, CDCl<sub>3</sub>)** δ 177.5, 166.5, 161.57 (d, *J* = 246.4 Hz), 143.6, 135.5, 135.3, 132.3 (d, *J* = 8.1 Hz), 132.1, 131.2 (d, *J* = 3.0 Hz), 131.0, 129.3, 128.3, 124.5, 123.2, 122.5, 120.8, 119.9, 119.8, 116.1, 115.6 (d, *J* = 21.2 Hz), 111.8, 109.5, 59.6, 57.1, 52.3, 48.0, 45.6, 26.8, 24.8, 21.8; **HRMS** Calculated for C<sub>33</sub>H<sub>33</sub>FN<sub>2</sub>O<sub>5</sub>S (M+H<sup>+</sup>): 589.2167; Found: 589.2173.

**<sup>1</sup>H NMR spectrum (400 MHz, CDCl<sub>3</sub>) of compound 80**

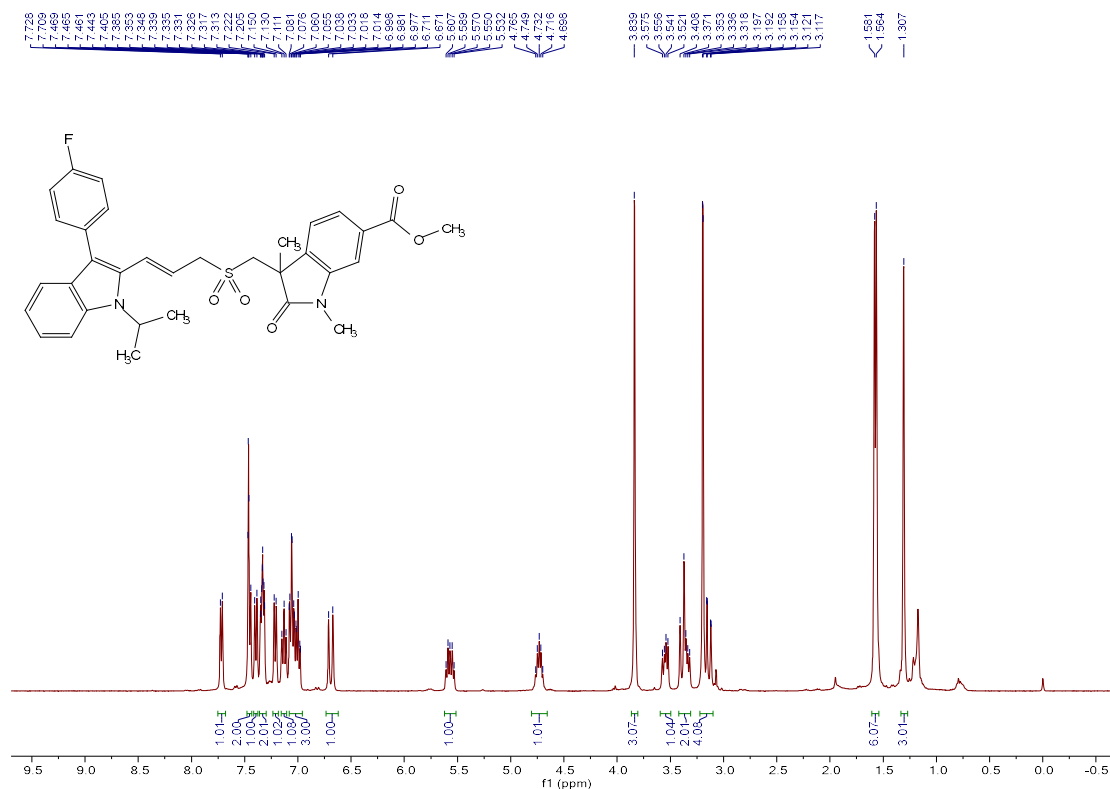

**<sup>19</sup>F NMR spectrum (376 MHz, CDCl<sub>3</sub>) of compound 80**

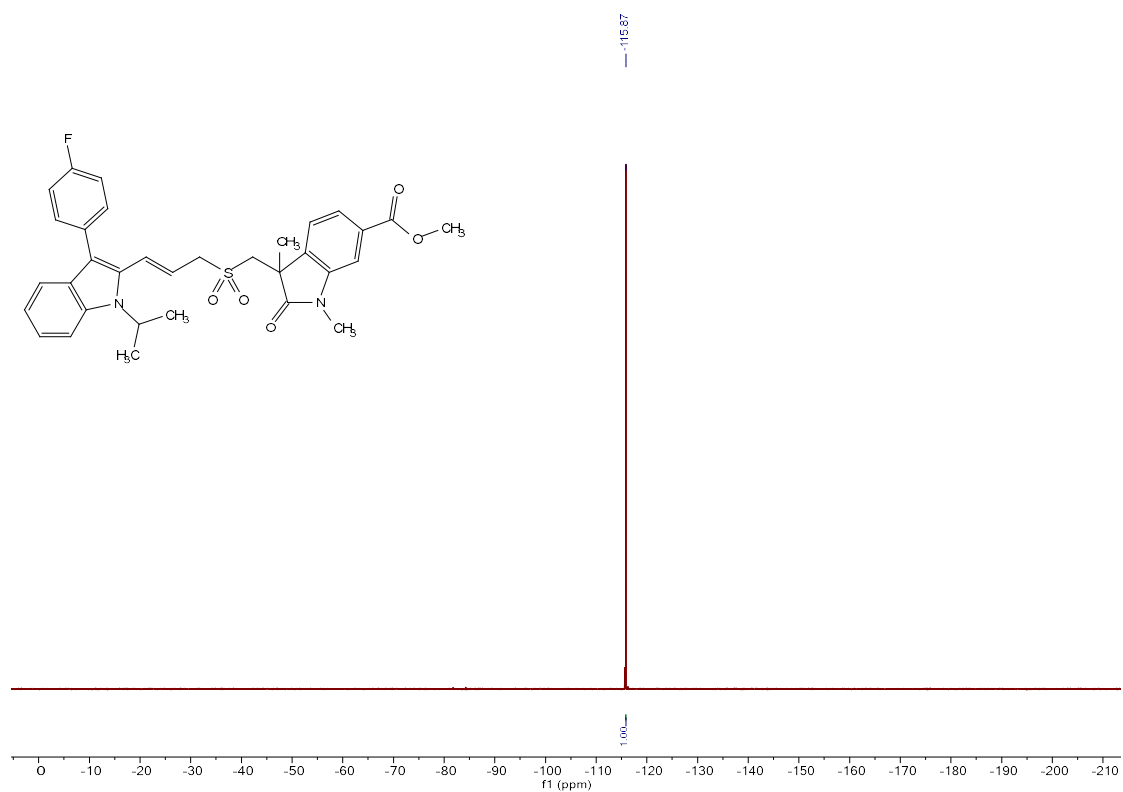

**<sup>13</sup>C NMR spectrum (101 MHz, CDCl<sub>3</sub>) of compound 80**

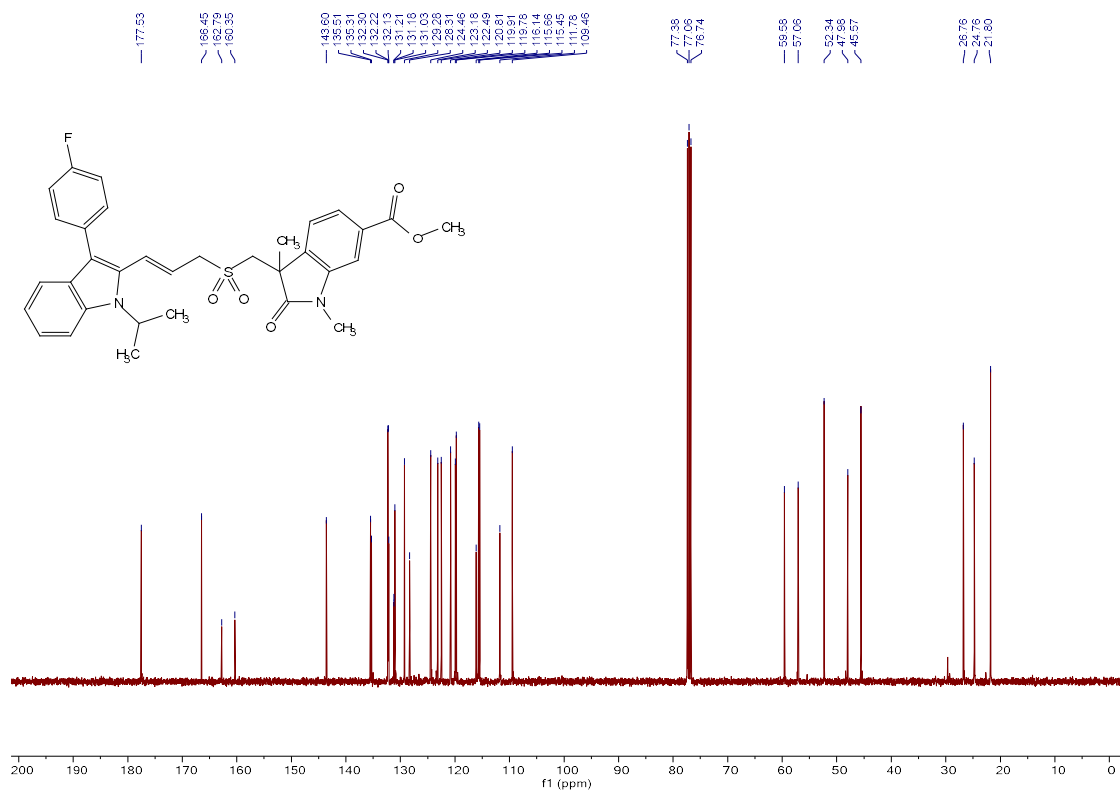

**(E)-1,3-dimethyl-3-(((3-phenylbut-2-en-1-yl)sulfonyl)methyl)indolin-2-one (81).**

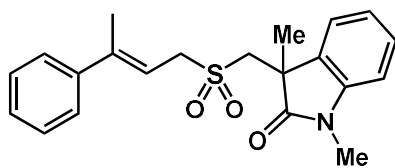

The product (44.3 mg, 60% yield) as brown solid was purified with silica gel chromatography (petroleum ether/ethyl acetate = 2/1).  $^1\text{H NMR}$  (400 MHz,  $\text{CDCl}_3$ )  $\delta$  7.33-7.20 (m, 7H), 7.03 (t,  $J = 7.6$  Hz, 1H), 6.83 (d,  $J = 8.0$  Hz, 1H), 5.68 (t,  $J = 8.0$  Hz, 1H), 3.66 (dd,  $J = 14.4$  Hz, 8.0 Hz, 1H), 3.58-3.51 (m, 2H), 3.46 (d,  $J = 14.4$  Hz, 1H), 3.18 (s, 3H), 1.98 (s, 3H), 1.38 (s, 3H);  $^{13}\text{C NMR}$  (101 MHz,  $\text{CDCl}_3$ )  $\delta$  178.0, 144.9, 143.4, 142.0, 130.5, 129.0, 128.4, 128.0, 126.0, 123.6, 122.7, 112.3, 108.8, 58.0, 55.9, 45.6, 26.6, 25.0, 16.7; HRMS Calculated for  $\text{C}_{21}\text{H}_{23}\text{NO}_3\text{S}$  ( $\text{M}+\text{H}^+$ ): 370.1471; Found: 370.1472.

$^1\text{H NMR}$  spectrum (400 MHz,  $\text{CDCl}_3$ ) of compound **81**

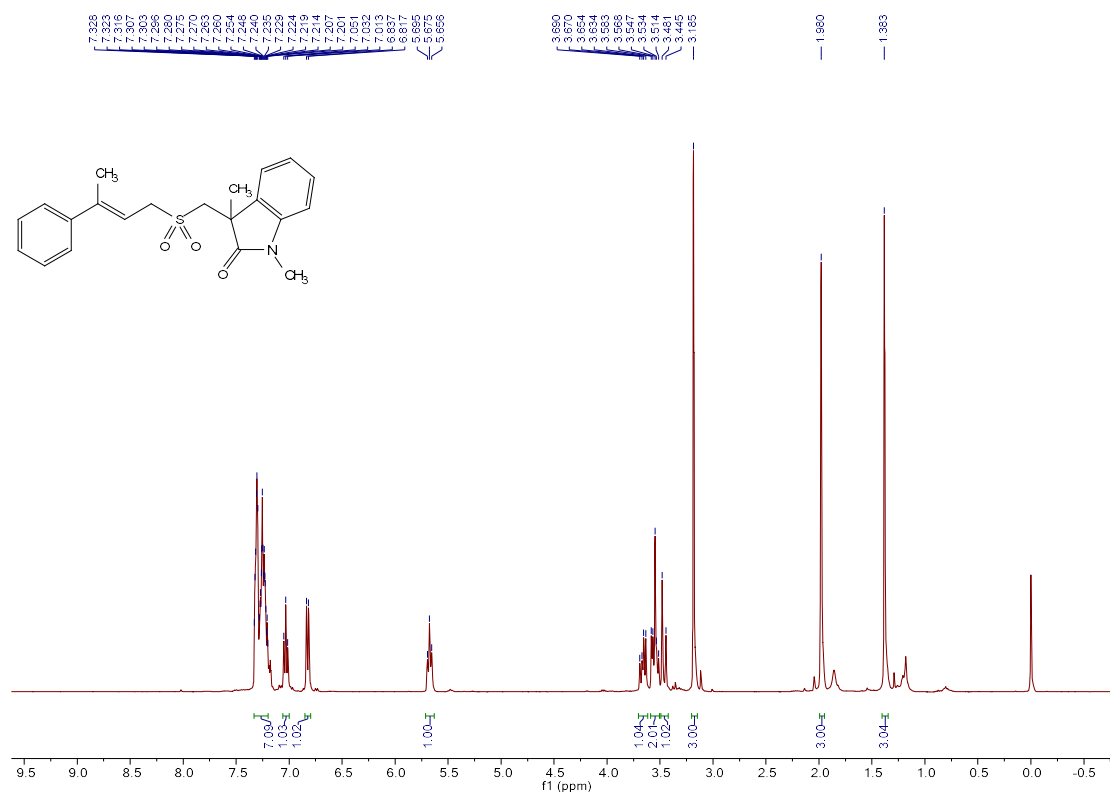

<sup>13</sup>C NMR spectrum (101 MHz, CDCl<sub>3</sub>) of compound **81**

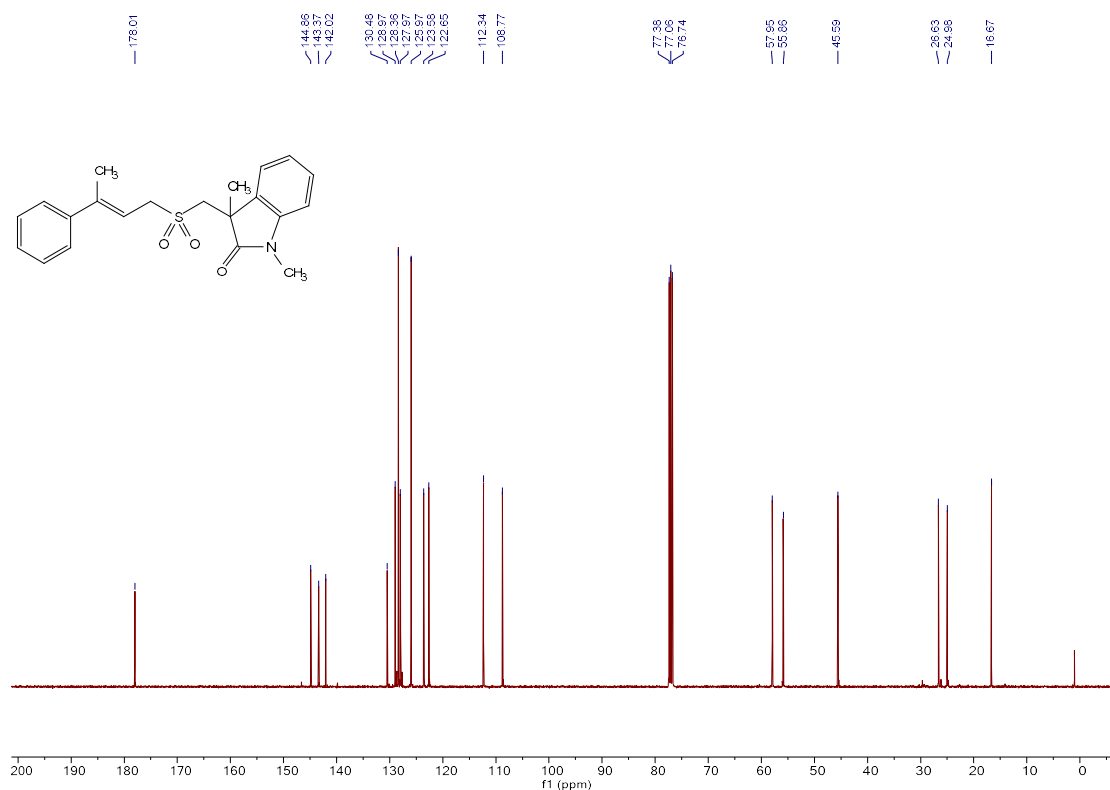

*(E)*-3-((hex-2-en-1-ylsulfonyl)methyl)-1,3-dimethylindolin-2-one (**82**).

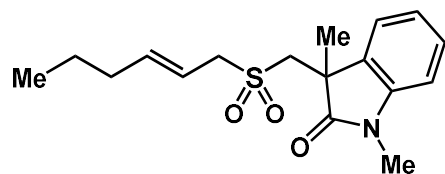

The product (54.6 mg, 85% yield) as brown oil was purified with silica gel chromatography (petroleum ether/ethyl acetate = 5/1). <sup>1</sup>H NMR (400 MHz, CDCl<sub>3</sub>) δ 7.30-7.24 (m, 2H), 7.03 (t, *J* = 7.6 Hz, 1H), 6.82 (d, *J* = 7.6 Hz, 1H), 5.76-5.68 (m, 1H), 5.40-5.33 (m, 1H), 3.52 (d, *J* = 14.4 Hz, 1H), 3.42 (d, *J* = 14.0 Hz, 1H), 3.38 (dd, *J* = 14.4 Hz, 7.2 Hz, 1H), 3.25 (dd, *J* = 14.0 Hz, 7.2 Hz, 1H), 3.18 (s, 3H), 2.00 (q, *J* = 7.2 Hz, 2H), 1.38-1.33 (m, 5H), 0.84 (t, *J* = 7.2 Hz, 3H); <sup>13</sup>C NMR (101 MHz, CDCl<sub>3</sub>) δ 177.9, 143.3, 141.7, 130.4, 128.9, 123.6, 122.5, 116.1, 108.7, 59.1, 56.6, 45.5, 34.6, 26.6, 24.8, 21.9, 13.6; HRMS Calculated for C<sub>17</sub>H<sub>23</sub>NO<sub>3</sub>S (M+H<sup>+</sup>): 322.1471; Found: 322.1471.

**<sup>1</sup>H NMR spectrum (400 MHz, CDCl<sub>3</sub>) of compound **82****

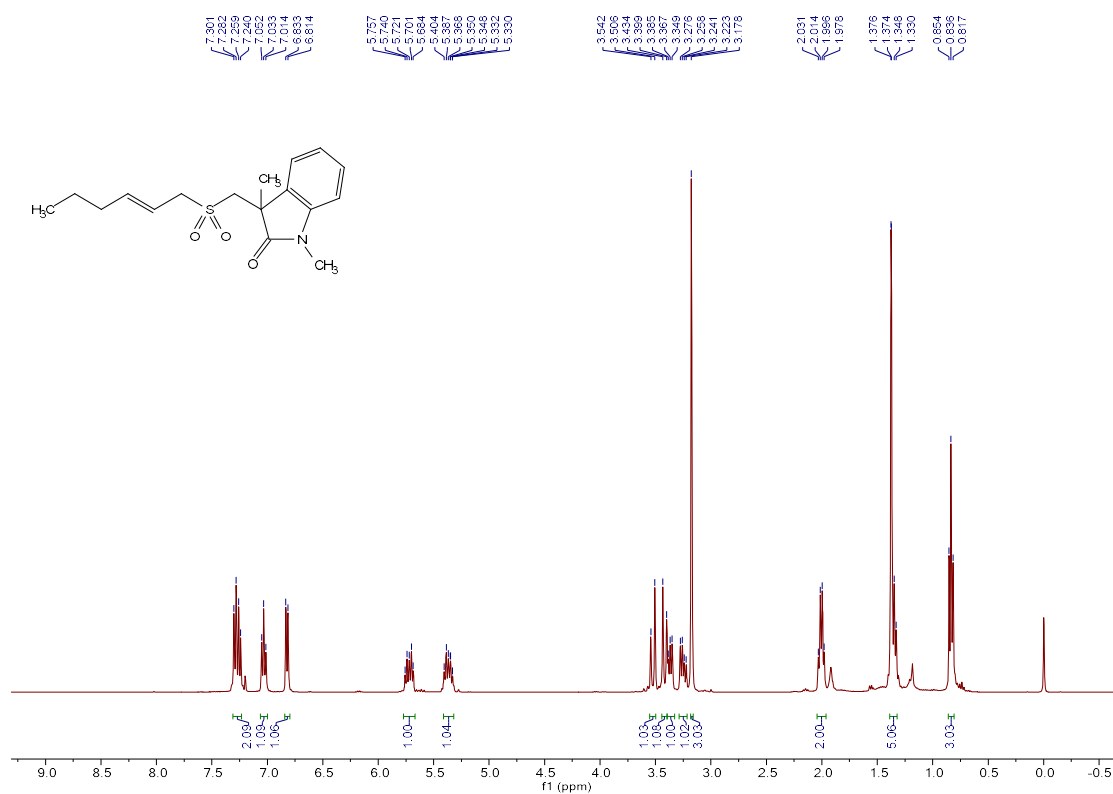

**<sup>13</sup>C NMR spectrum (101 MHz, CDCl<sub>3</sub>) of compound **82****

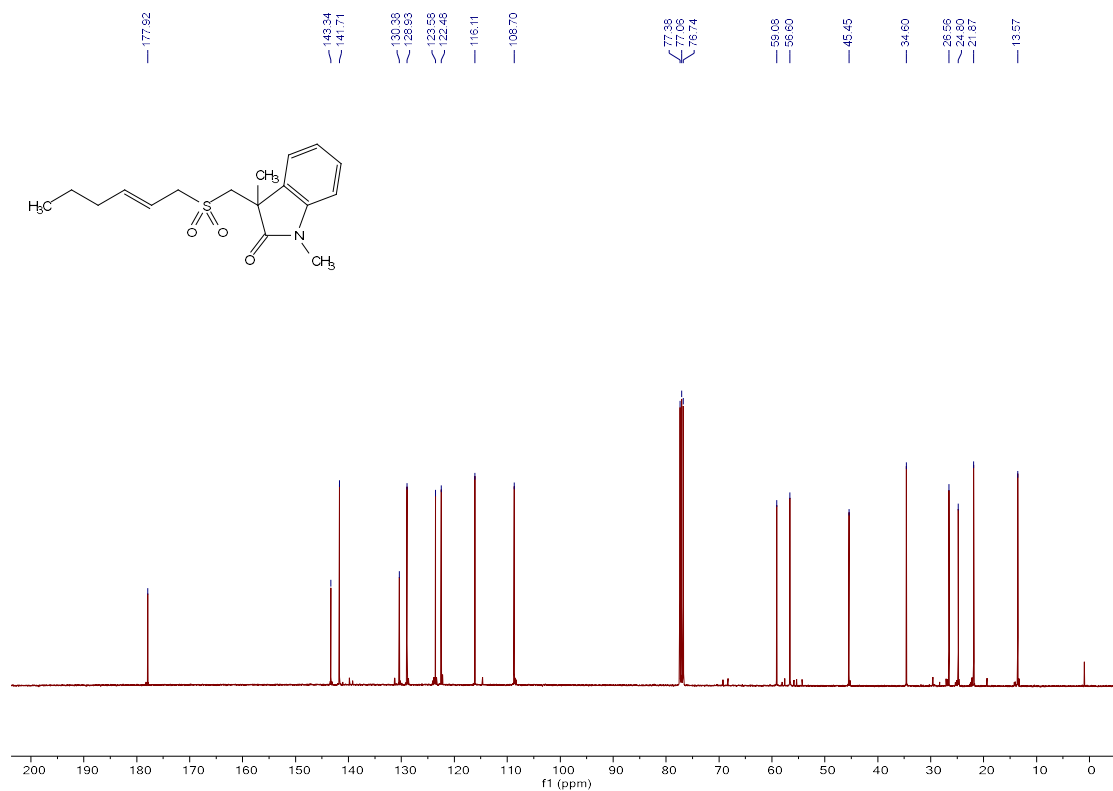

**3-((cinnamylsulfonyl)methyl)-1,3-dimethylindolin-2-one (84).**

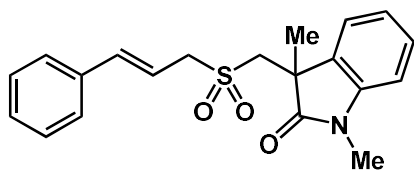

The product (66.1 mg, 93% yield) as white solid was purified with silica gel chromatography (petroleum ether/ethyl acetate = 2/1).  $^1\text{H NMR}$  (400 MHz,  $\text{CDCl}_3$ )  $\delta$  7.44-7.30 (m, 7H), 7.15 (t,  $J$  = 7.6 Hz, 1H), 6.94 (d,  $J$  = 7.6 Hz, 1H), 6.68 (d,  $J$  = 16.0 Hz, 1H), 6.22-6.14 (m, 1H), 3.74-3.67 (m, 2H), 3.59-3.54 (m, 2H), 3.29 (s, 3H), 1.47 (s, 3H);  $^{13}\text{C NMR}$  (101 MHz,  $\text{CDCl}_3$ )  $\delta$  177.9, 143.4, 139.2, 135.6, 130.4, 129.0, 128.71, 128.68, 126.8, 123.5, 122.6, 115.2, 108.8, 59.5, 57.0, 45.6, 26.6, 24.9; HRMS Calculated for  $\text{C}_{20}\text{H}_{21}\text{NO}_3\text{S}$  ( $\text{M}+\text{H}^+$ ): 356.1315; Found: 356.1316.

$^1\text{H NMR}$  spectrum (400 MHz,  $\text{CDCl}_3$ ) of compound **84**

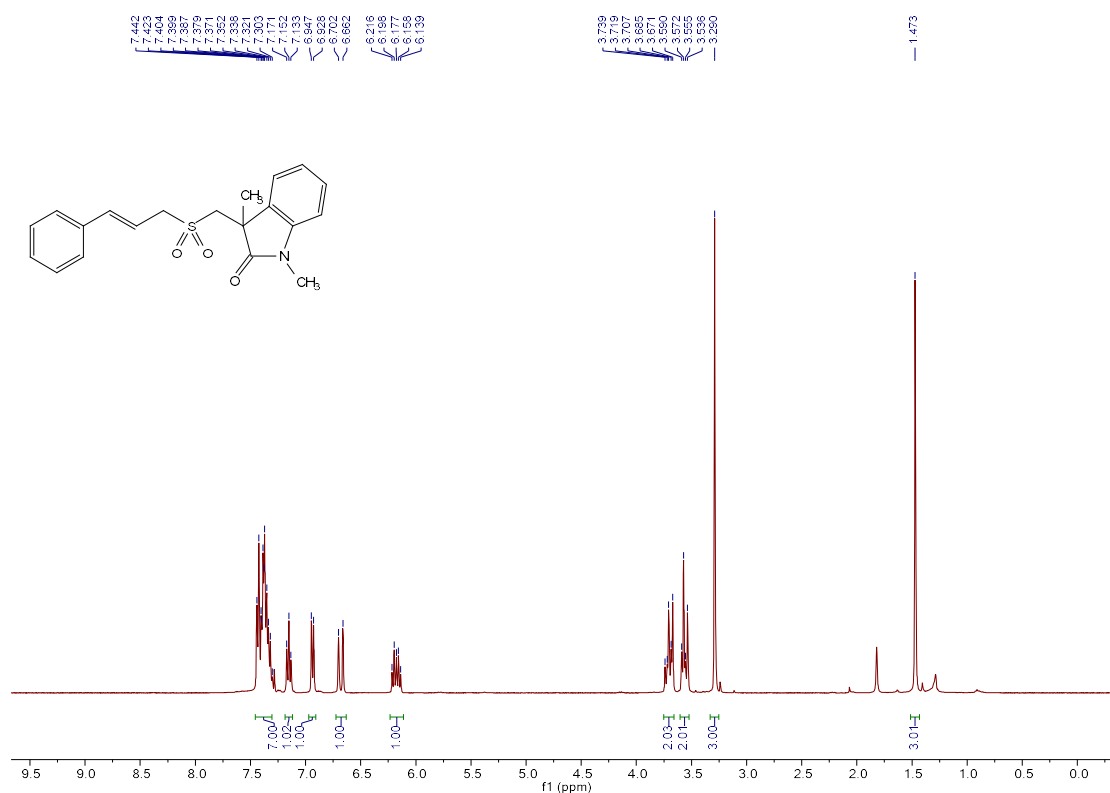



<sup>13</sup>C NMR spectrum (101 MHz, CDCl<sub>3</sub>) of compound **84**

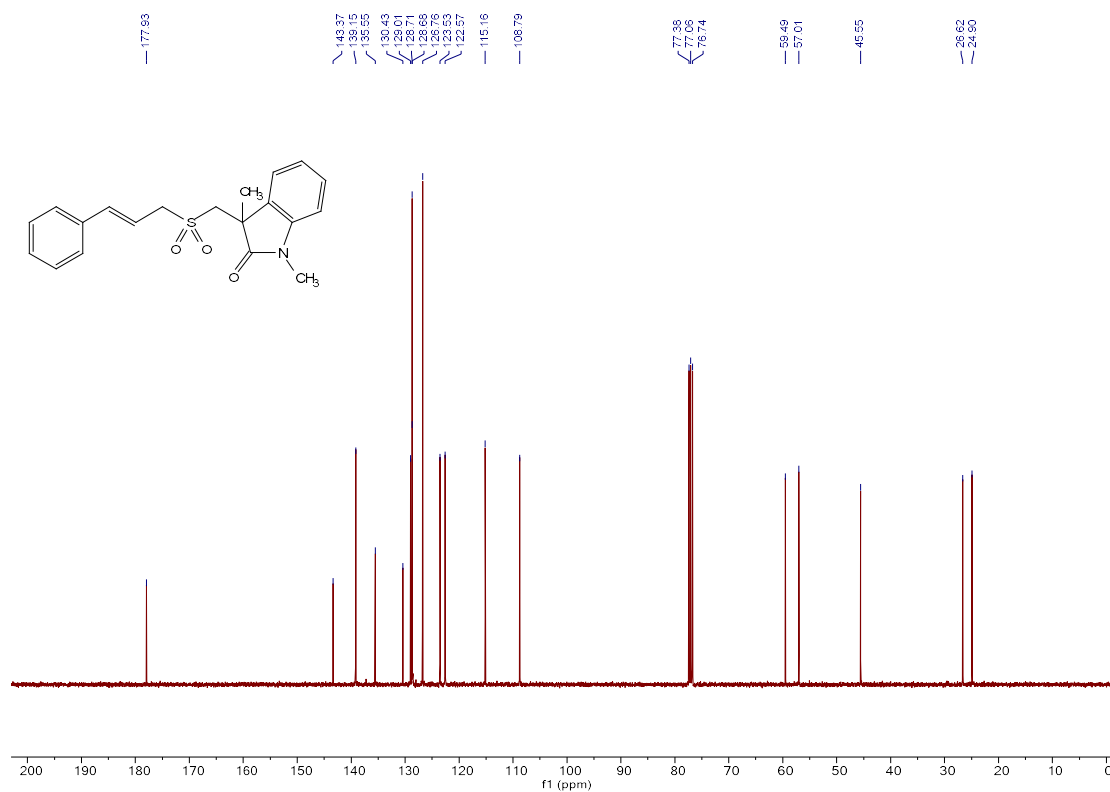

**1-methyl-4-((2-methyl-4-phenylbut-3-yn-2-yl)sulfonyl)benzene (85).**

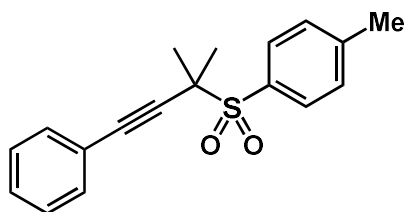

The product (46.0 mg, 77% yield) as yellow solid was purified with silica gel chromatography (petroleum ether/ethyl acetate = 5/1). <sup>1</sup>H NMR (400 MHz, CDCl<sub>3</sub>) δ 7.82 (d, *J* = 8.4 Hz, 2H), 7.28-7.22 (m, 7H), 2.38 (s, 3H), 1.61 (s, 6H); <sup>13</sup>C NMR (101 MHz, CDCl<sub>3</sub>) δ 145.0, 132.1, 131.7, 131.0, 129.2, 128.8, 128.3, 122.1, 87.6, 86.4, 59.4, 23.4, 21.7; HRMS Calculated for C<sub>18</sub>H<sub>18</sub>O<sub>2</sub>S (M+Na<sup>+</sup>): 321.0920; Found: 321.0920.

<sup>1</sup>H NMR spectrum (400 MHz, CDCl<sub>3</sub>) of compound **85**

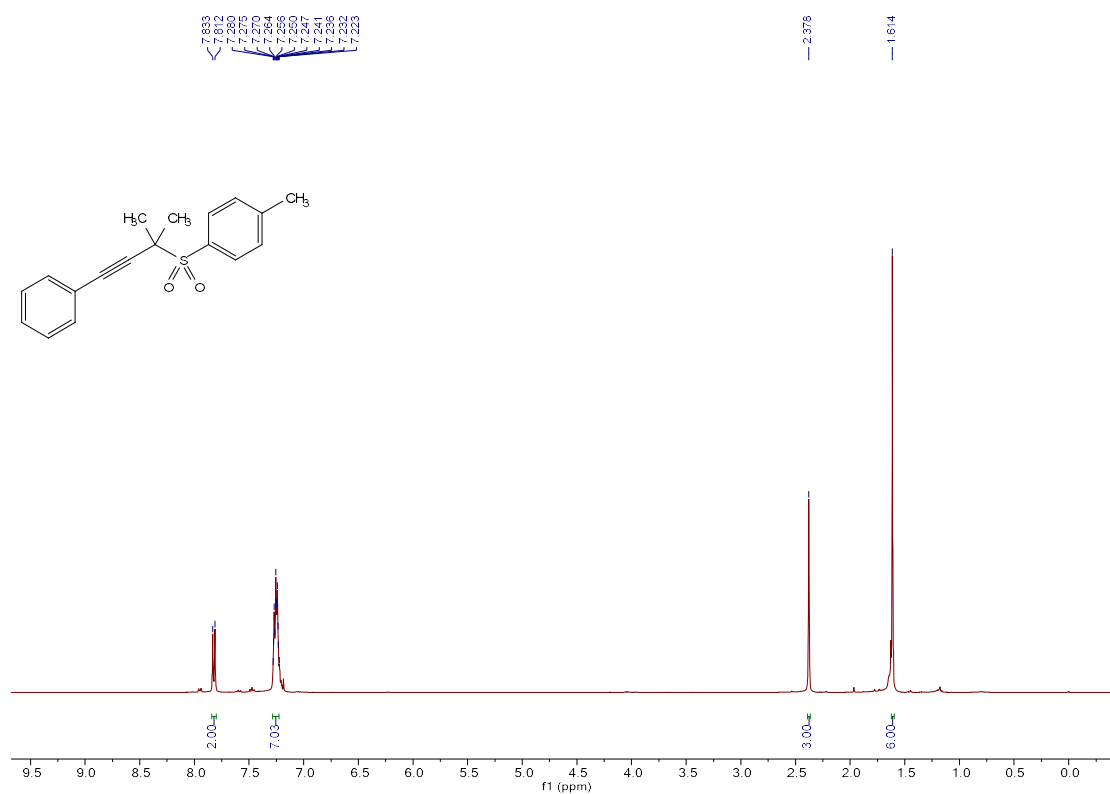

<sup>13</sup>C NMR spectrum (101 MHz, CDCl<sub>3</sub>) of compound **85**

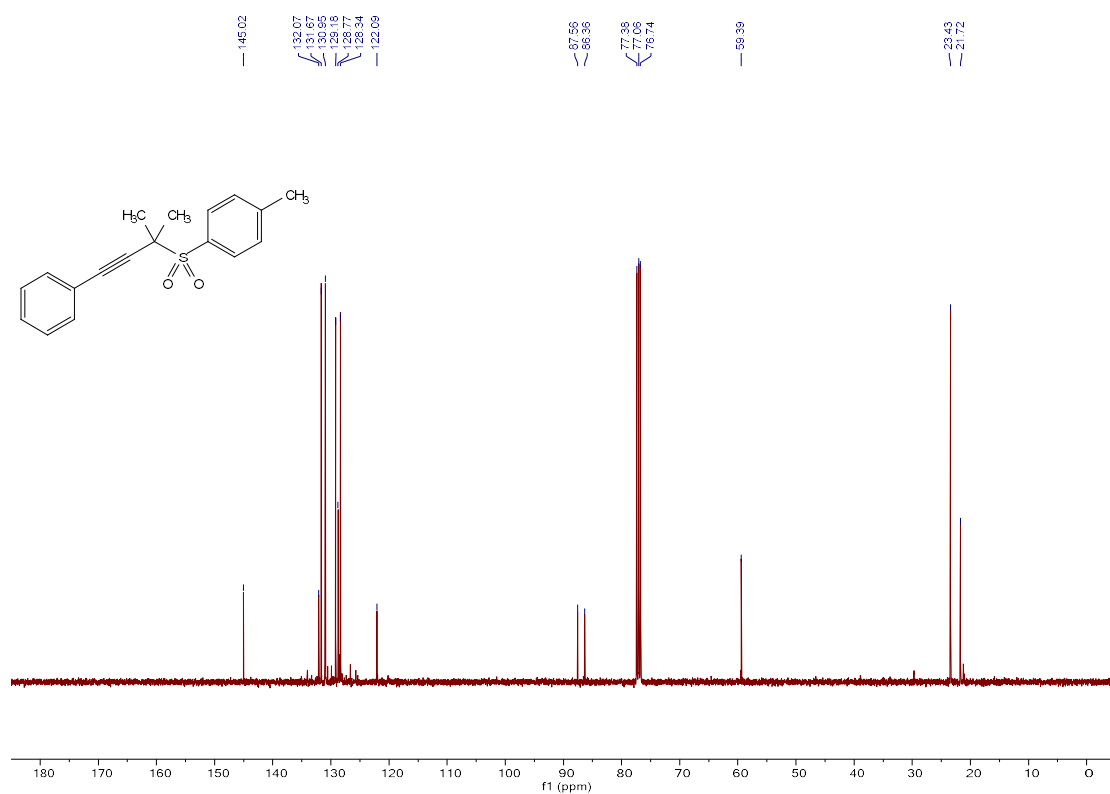

**1-methoxy-3-(3-methyl-3-tosylbut-1-yn-1-yl)benzene (86).**

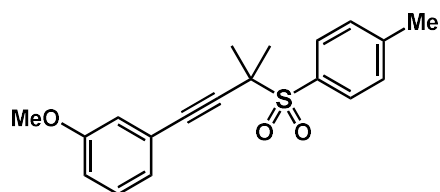

The product (47.9 mg, 73% yield) as brown solid was purified with silica gel chromatography (petroleum ether/ethyl acetate = 5/1).  $^1\text{H NMR}$  (400 MHz,  $\text{CDCl}_3$ )  $\delta$  7.82 (d,  $J = 8.4$  Hz, 2H), 7.26 (d,  $J = 8.0$  Hz, 2H), 7.13 (t,  $J = 8.0$  Hz, 1H), 6.87-6.78 (m, 3H), 3.72 (s, 3H), 2.37 (s, 3H), 1.61 (s, 6H);  $^{13}\text{C NMR}$  (101 MHz,  $\text{CDCl}_3$ )  $\delta$  159.3, 145.0, 132.1, 130.9, 129.4, 129.2, 124.2, 123.0, 116.6, 115.3, 87.3, 86.3, 59.4, 55.3, 23.4, 21.7; HRMS Calculated for  $\text{C}_{19}\text{H}_{20}\text{O}_3\text{S}$  ( $\text{M}+\text{Na}^+$ ): 351.1025; Found: 351.1030.

$^1\text{H NMR}$  spectrum (400 MHz,  $\text{CDCl}_3$ ) of compound **86**

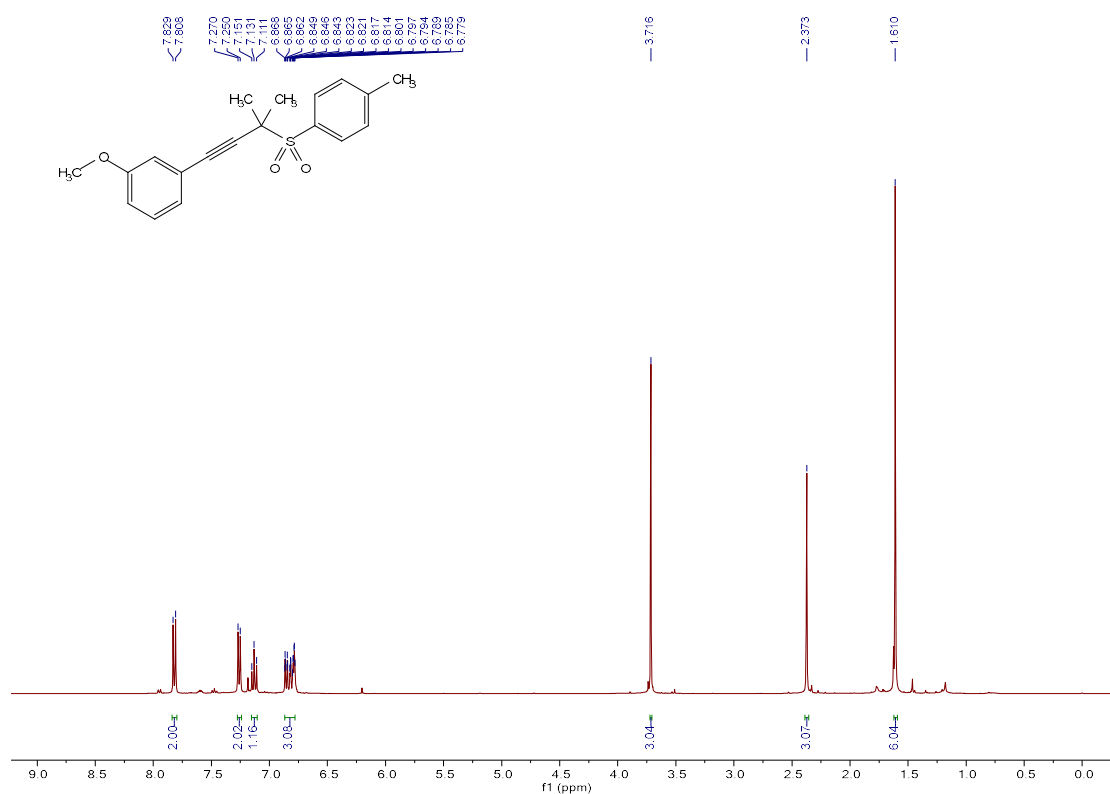

<sup>13</sup>C NMR spectrum (101 MHz, CDCl<sub>3</sub>) of compound **86**

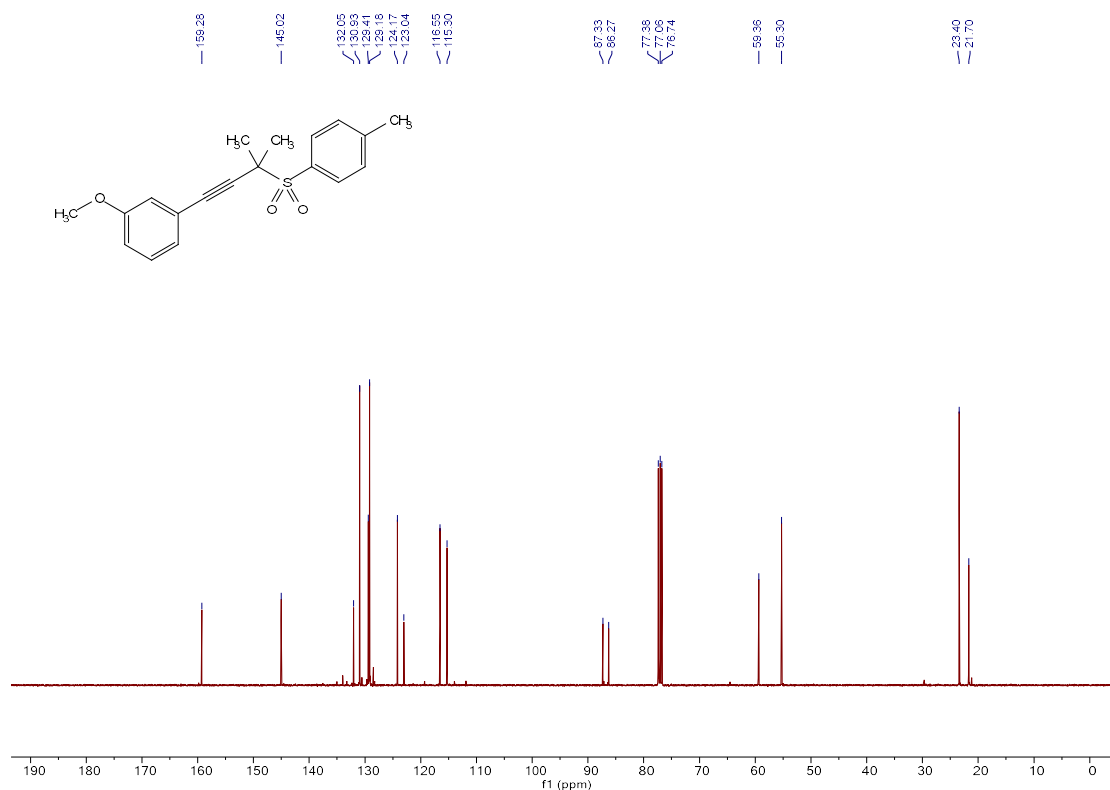

**methyl 4-(3-methyl-3-tosylbut-1-yn-1-yl)benzoate (87).**

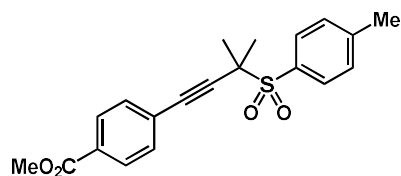

The product (52.0 mg, 73% yield) as brown solid was purified with silica gel chromatography (petroleum ether/ethyl acetate = 2/1). <sup>1</sup>H NMR (400 MHz, CDCl<sub>3</sub>) δ 7.90 (d, *J* = 8.0 Hz, 2H), 7.81 (d, *J* = 8.0 Hz, 2H), 7.32 (d, *J* = 8.4 Hz, 2H), 7.26 (d, *J* = 7.6 Hz, 2H), 3.84 (s, 3H), 2.38 (s, 3H), 1.62 (s, 6H); <sup>13</sup>C NMR (101 MHz, CDCl<sub>3</sub>) δ 166.4, 145.2, 131.9, 131.6, 130.9, 130.0, 129.5, 129.2, 126.7, 90.5, 85.5, 59.4, 52.3, 23.3, 21.7; HRMS Calculated for C<sub>20</sub>H<sub>20</sub>O<sub>4</sub>S (M+Na<sup>+</sup>): 379.0975; Found: 379.0974.

<sup>1</sup>H NMR spectrum (400 MHz, CDCl<sub>3</sub>) of compound **87**

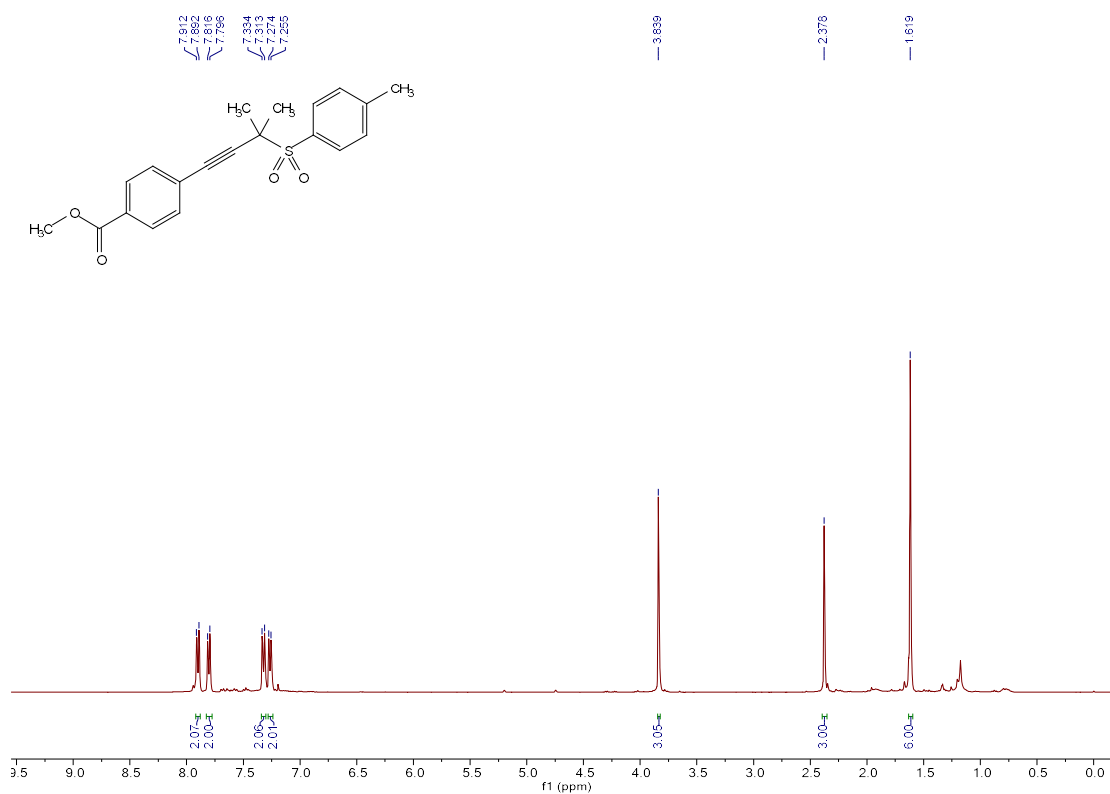

<sup>13</sup>C NMR spectrum (101 MHz, CDCl<sub>3</sub>) of compound **87**

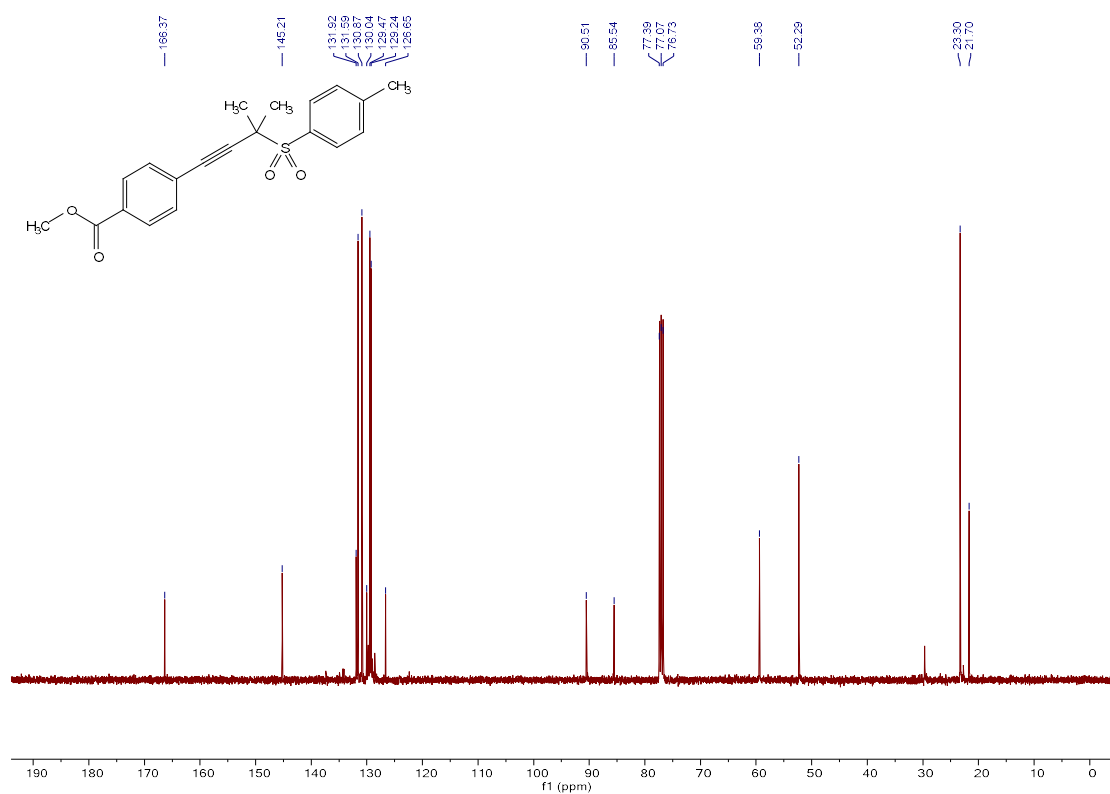

**1-chloro-3-(3-methyl-3-tosylbut-1-yn-1-yl)benzene (88).**

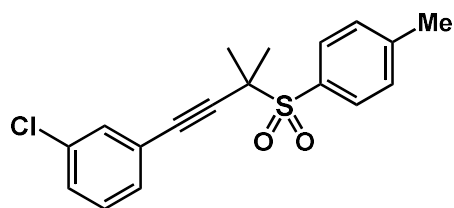

The product (49.3 mg, 74% yield) as brown solid was purified with silica gel chromatography (petroleum ether/ethyl acetate = 5/1).  $^1\text{H NMR}$  (400 MHz,  $\text{CDCl}_3$ )  $\delta$  7.90 (d,  $J = 8.0$  Hz, 2H), 7.37 (d,  $J = 8.0$  Hz, 2H), 7.34-7.32 (m, 2H), 7.27-7.23 (m, 2H), 2.49 (s, 3H), 1.70 (s, 6H);  $^{13}\text{C NMR}$  (101 MHz,  $\text{CDCl}_3$ )  $\delta$  145.2, 134.2, 132.0, 131.6, 130.9, 129.8, 129.6, 129.3, 129.1, 123.7, 88.9, 84.9, 59.3, 23.3, 21.7; HRMS Calculated for  $\text{C}_{18}\text{H}_{17}\text{ClO}_2\text{S}$  ( $\text{M}+\text{Na}^+$ ): 355.0530; Found: 355.0530.

$^1\text{H NMR}$  spectrum (400 MHz,  $\text{CDCl}_3$ ) of compound **88**

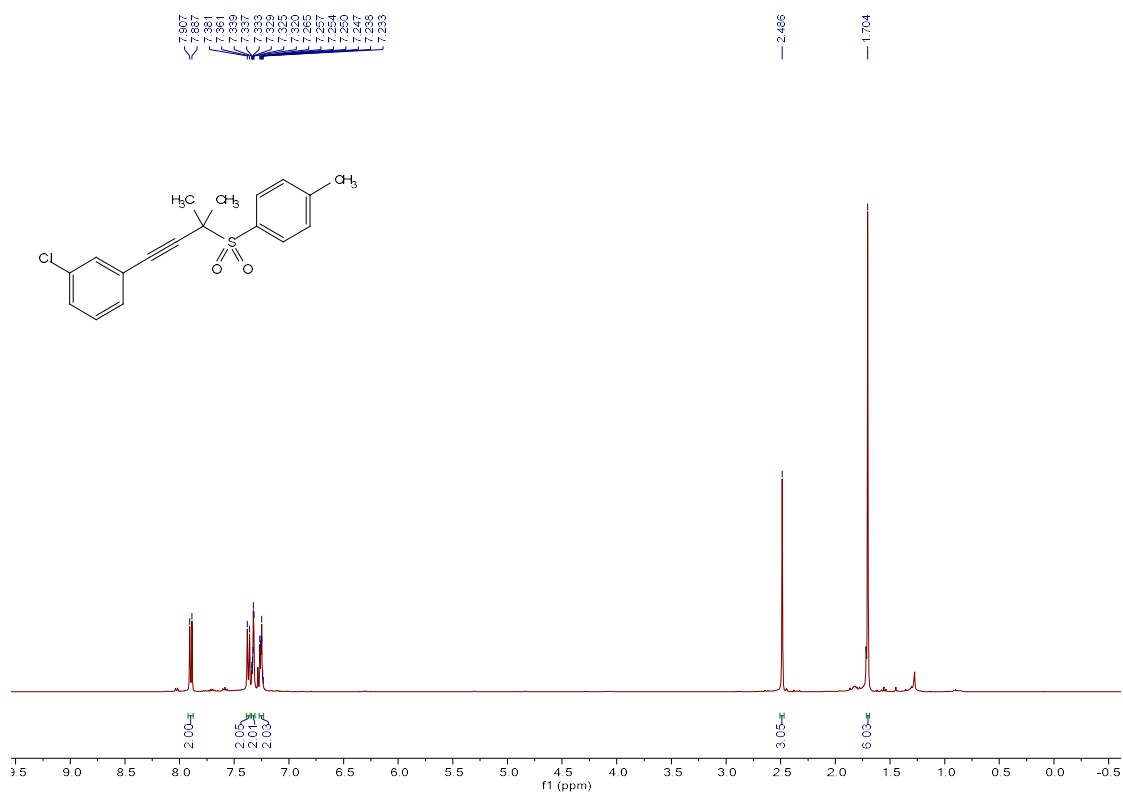

<sup>13</sup>C NMR spectrum (101 MHz, CDCl<sub>3</sub>) of compound **88**

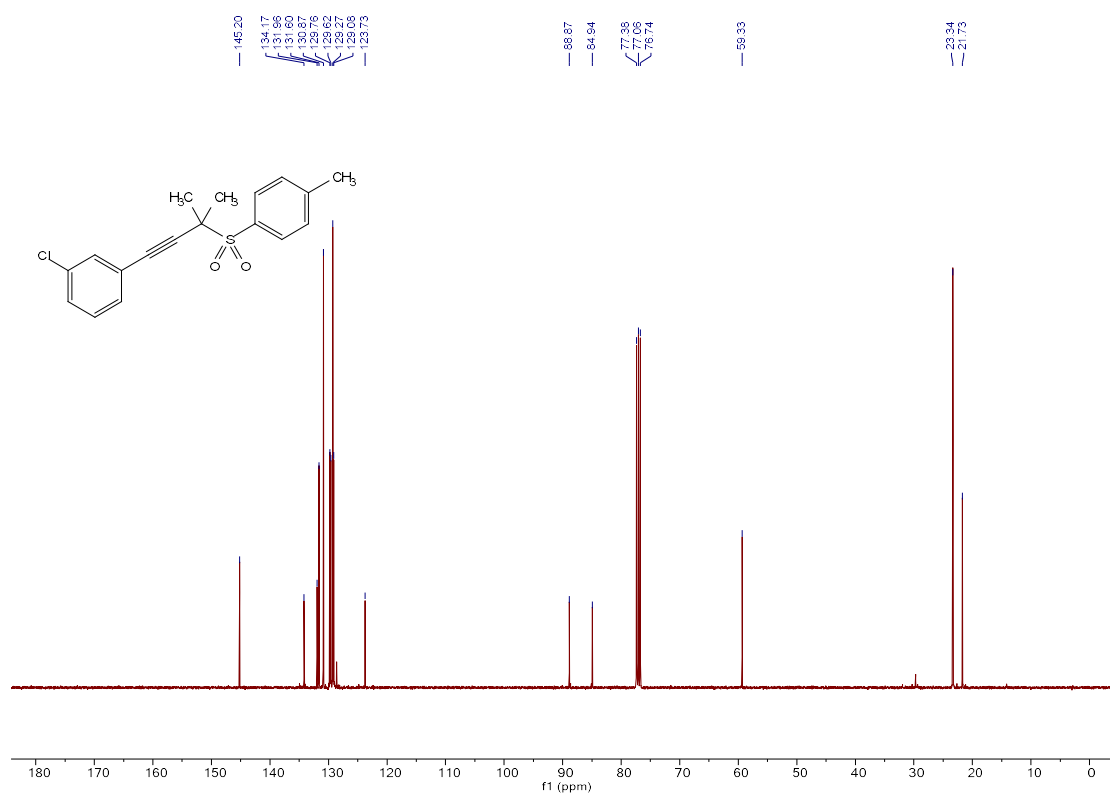

**3-(3-methyl-3-tosylbut-1-yn-1-yl)thiophene (89).**

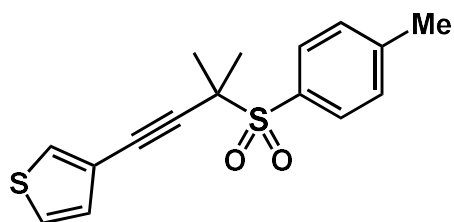

The product (38.4 mg, 63% yield) as brown solid was purified with silica gel chromatography (petroleum ether/ethyl acetate = 5/1). <sup>1</sup>H NMR (400 MHz, CDCl<sub>3</sub>) δ 7.81 (d, *J* = 8.4 Hz, 2H), 7.31 (d, *J* = 3.2 Hz, 1H), 7.26 (d, *J* = 8.0 Hz, 2H), 7.19-7.17 (m, 1H), 6.95 (d, *J* = 5.2 Hz, 1H), 2.38 (s, 3H), 1.60 (s, 6H); <sup>13</sup>C NMR (101 MHz, CDCl<sub>3</sub>) δ 145.0, 132.1, 131.0, 129.7, 129.4, 129.2, 125.5, 121.1, 87.1, 81.7, 59.4, 23.4, 21.7; HRMS Calculated for C<sub>16</sub>H<sub>16</sub>O<sub>2</sub>S<sub>2</sub> (M+Na<sup>+</sup>): 327.0484; Found: 327.0479.

**<sup>1</sup>H NMR spectrum (400 MHz, CDCl<sub>3</sub>) of compound **89****

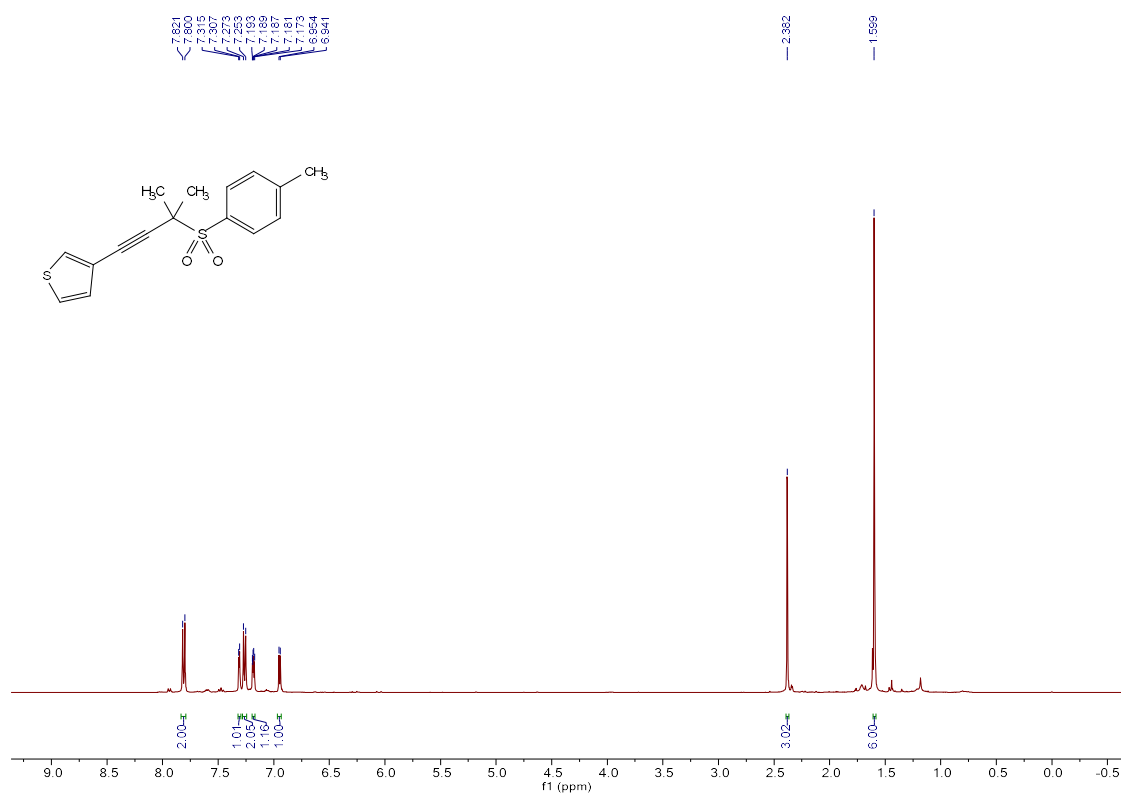

**<sup>13</sup>C NMR spectrum (101 MHz, CDCl<sub>3</sub>) of compound **89****

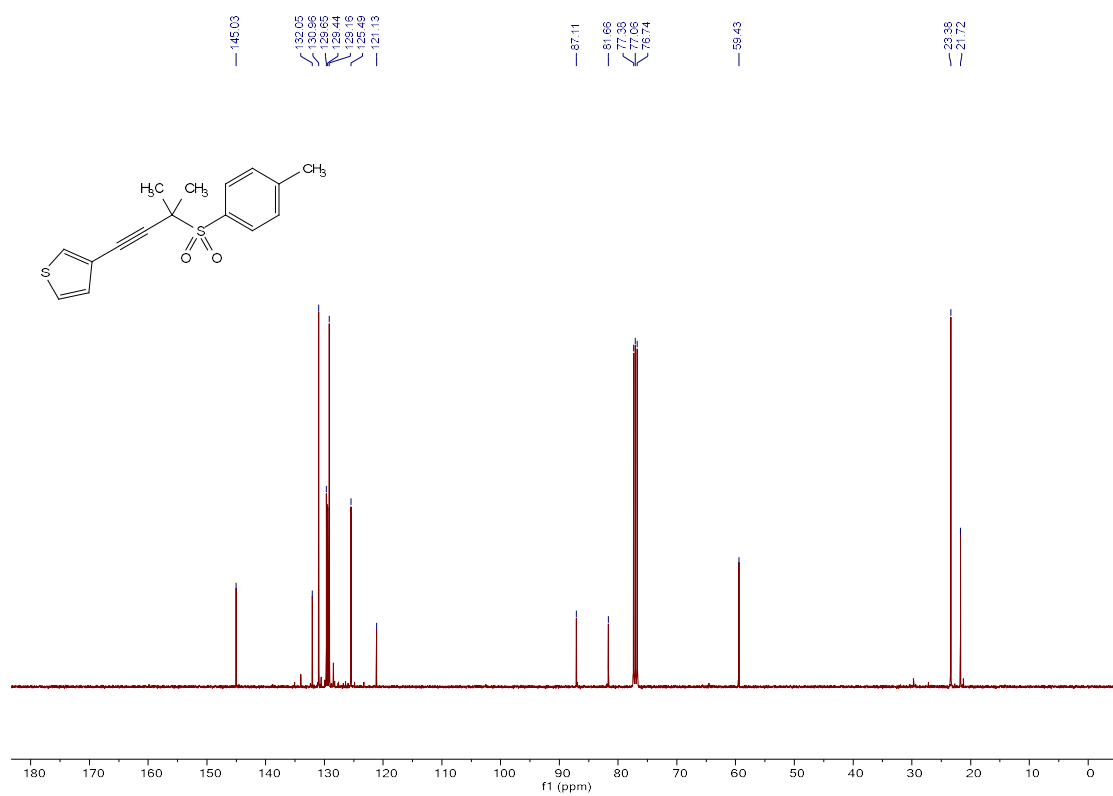



**1,3-dimethyl-3-(((2-methyl-4-phenylbut-3-yn-2-yl)sulfonyl)methyl)indolin-2-one (90).**

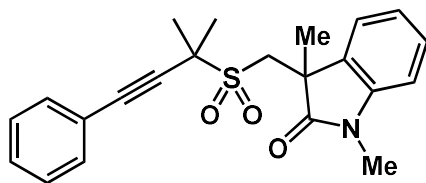

The product (45.8 mg, 60% yield) as yellow oil was purified with silica gel chromatography (petroleum ether/ethyl acetate = 2/1).  $^1\text{H NMR}$  (400 MHz,  $\text{CDCl}_3$ )  $\delta$  7.54-7.49 (m, 3H), 7.39-7.33 (m, 4H), 7.12 (t,  $J = 7.6$  Hz, 1H), 6.91 (d,  $J = 7.6$  Hz, 1H), 4.12 (d,  $J = 13.6$  Hz, 1H), 3.75 (d,  $J = 13.6$  Hz, 1H), 3.29 (s, 3H), 1.68 (d,  $J = 10.8$  Hz, 6H), 1.53 (s, 3H);  $^{13}\text{C NMR}$  (101 MHz,  $\text{CDCl}_3$ )  $\delta$  178.1, 143.3, 132.0, 130.3, 129.0, 128.8, 128.4, 124.4, 122.5, 121.8, 108.5, 87.0, 86.5, 59.1, 52.6, 45.2, 26.7, 25.3, 23.1, 22.5; **HRMS** Calculated for  $\text{C}_{22}\text{H}_{23}\text{NO}_3\text{S}$  ( $\text{M}+\text{Na}^+$ ): 404.1291; Found: 404.1295.

$^1\text{H NMR}$  spectrum (400 MHz,  $\text{CDCl}_3$ ) of compound **90**

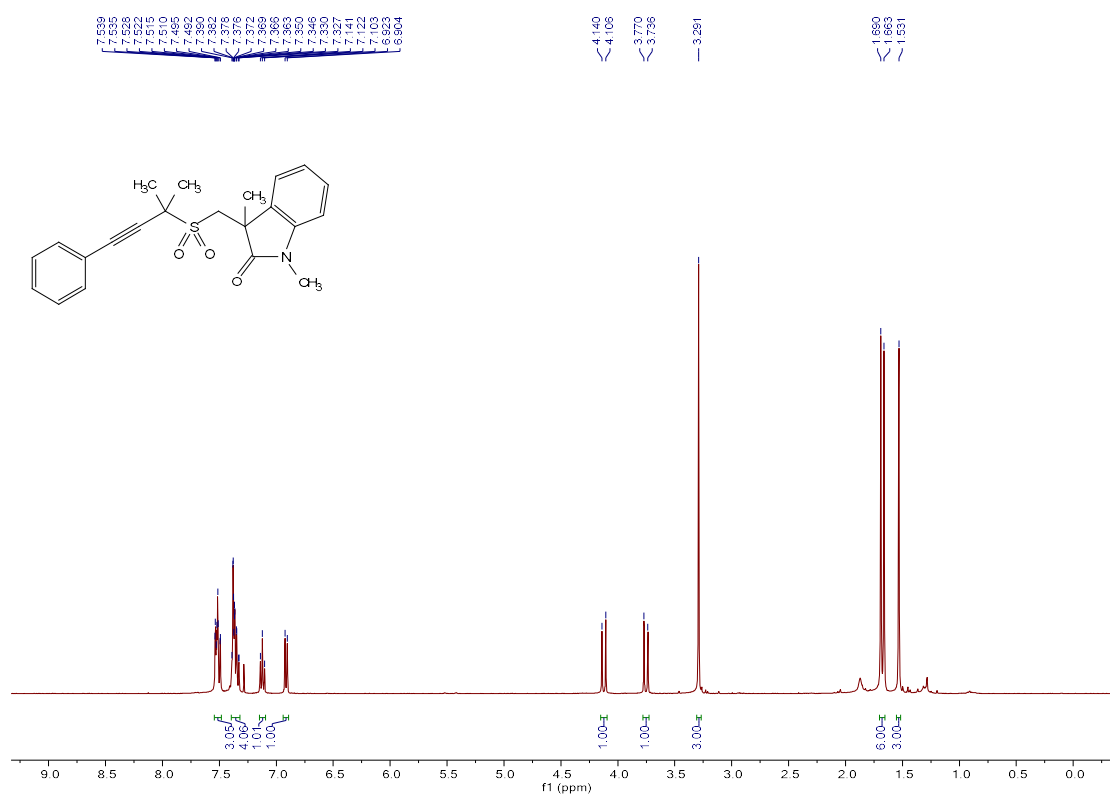

<sup>13</sup>C NMR spectrum (101 MHz, CDCl<sub>3</sub>) of compound **90**

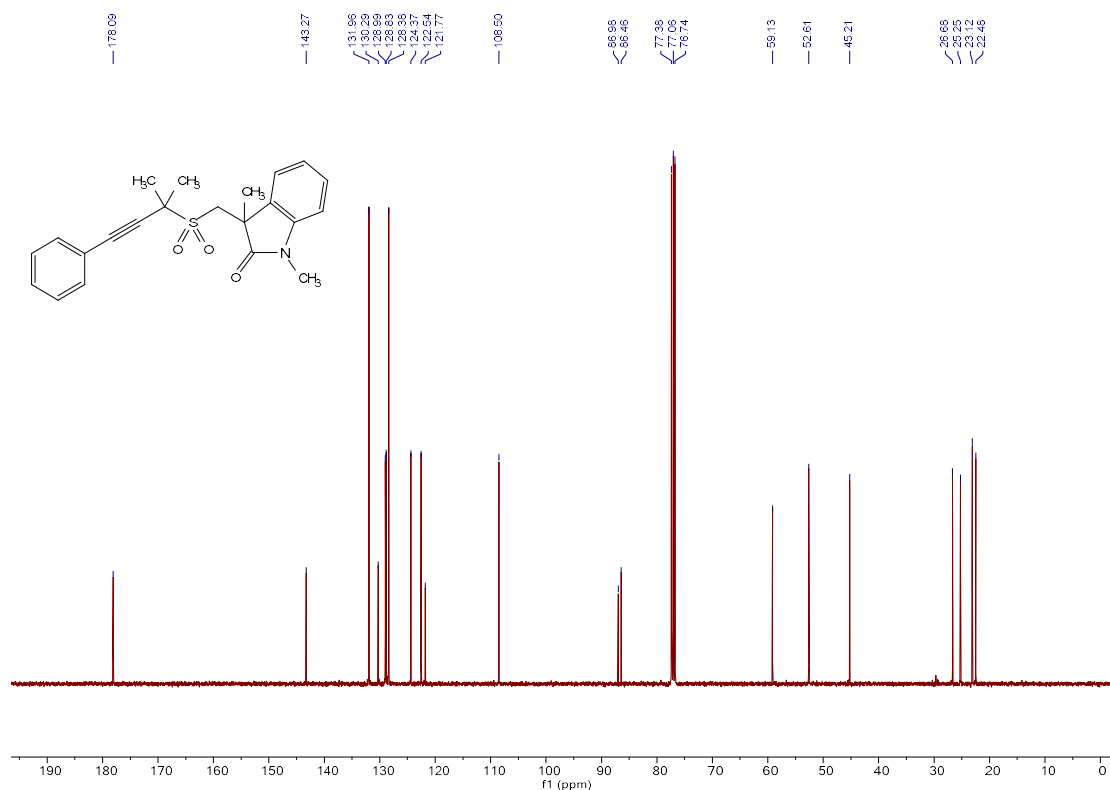

**3-(((4-(3-methoxyphenyl)-2-methylbut-3-yn-2-yl)sulfonyl)methyl)-1,3-dimethylindolin-2-one (91).**

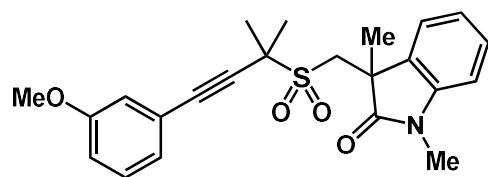

The product (51.0 mg, 62% yield) as brown solid was purified with silica gel chromatography (petroleum ether/ethyl acetate = 2/1). <sup>1</sup>H NMR (400 MHz, CDCl<sub>3</sub>) δ 7.39 (d, *J* = 7.2 Hz, 1H), 7.24 (t, *J* = 7.6 Hz, 1H), 7.17 (t, *J* = 7.6 Hz, 1H), 7.04-6.99 (m, 3H), 6.86-6.80 (m, 2H), 4.03 (d, *J* = 13.6 Hz, 1H), 3.75 (s, 3H), 3.64 (d, *J* = 13.6 Hz, 1H), 3.18 (s, 3H), 1.57 (d, *J* = 8.8 Hz, 6H), 1.42 (s, 3H); <sup>13</sup>C NMR (101 MHz, CDCl<sub>3</sub>) δ 178.0, 159.3, 143.3, 130.3, 129.4, 128.8, 124.4, 124.3, 122.7, 122.5, 116.7, 115.8, 108.5, 86.9, 86.2, 59.1, 55.4, 52.6, 45.2, 26.7, 25.3, 23.0, 22.5; HRMS Calculated for C<sub>23</sub>H<sub>25</sub>NO<sub>4</sub>S (M+Na<sup>+</sup>): 434.1397; Found: 434.1399.

<sup>1</sup>H NMR spectrum (400 MHz, CDCl<sub>3</sub>) of compound **91**

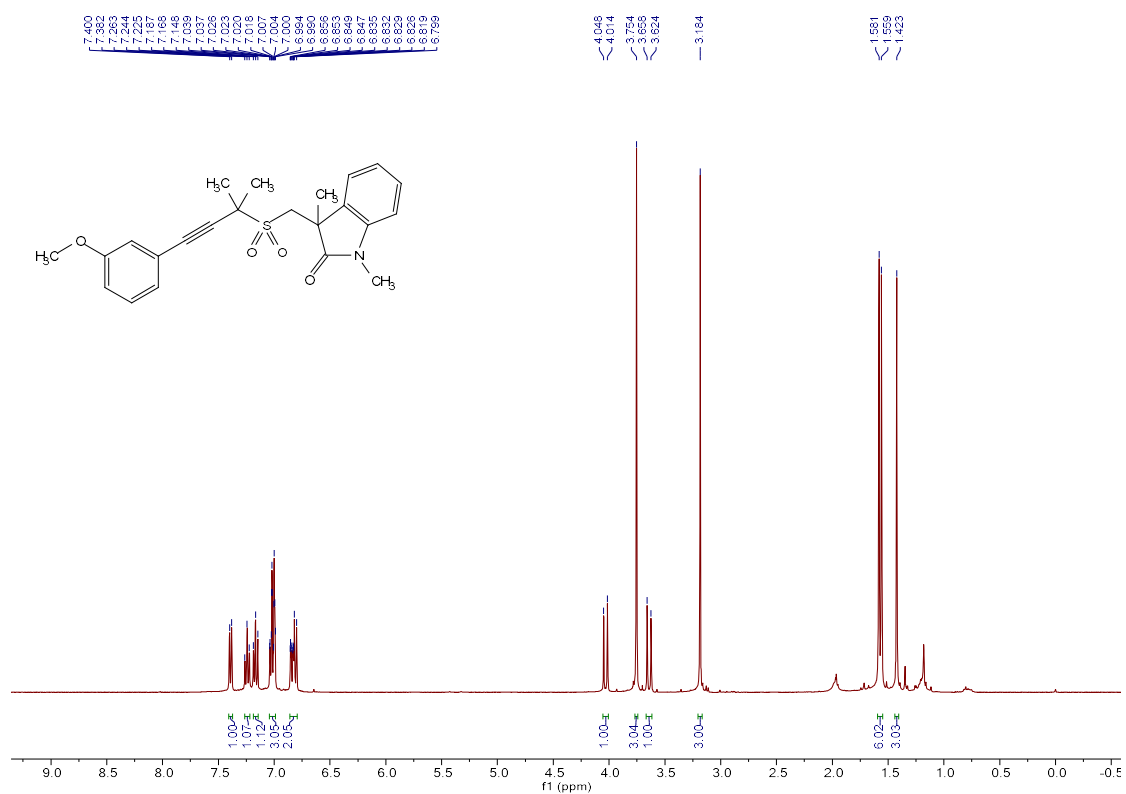

<sup>13</sup>C NMR spectrum (101 MHz, CDCl<sub>3</sub>) of compound **91**

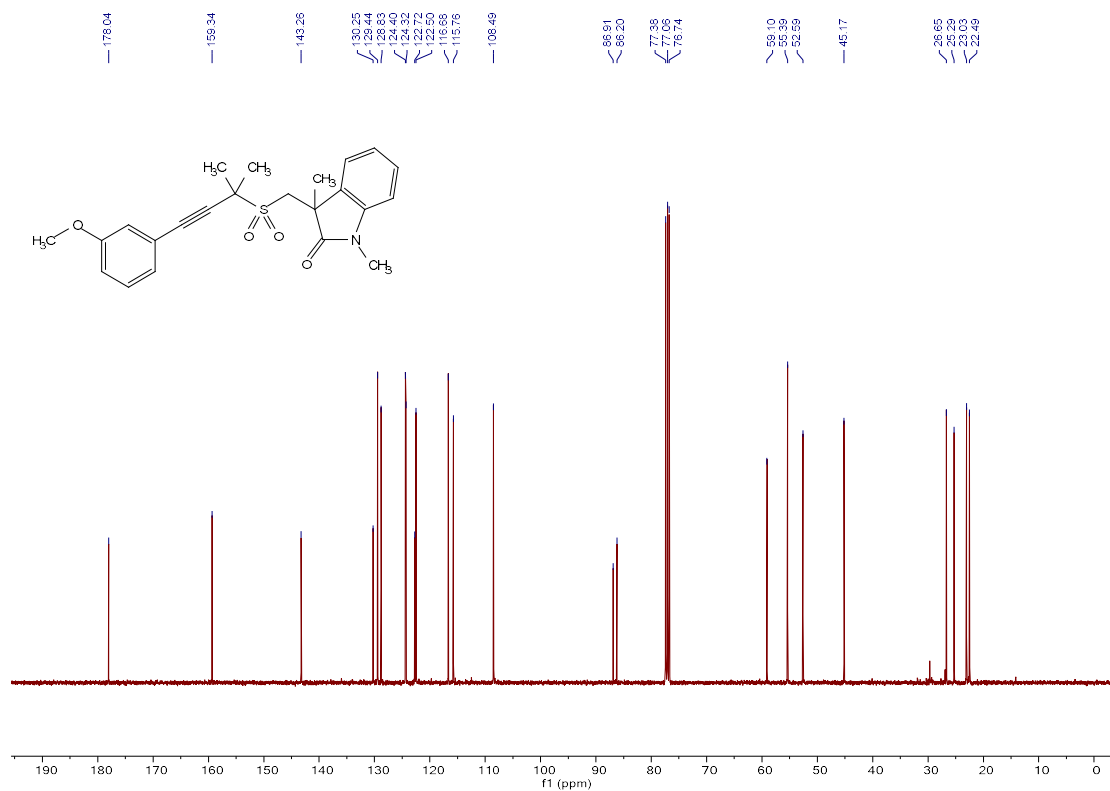

methyl 4-(3-(((1,3-dimethyl-2-oxindolin-3-yl)methyl)sulfonyl)-3-methylbut-1-yn-1-yl)benzoate (**92**).

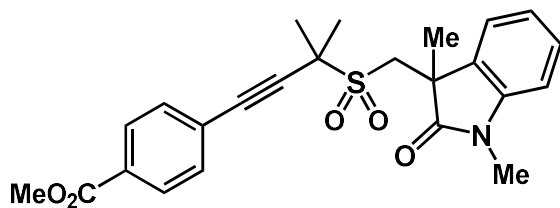

The product (52.7 mg, 60% yield) as yellow solid was purified with silica gel chromatography (petroleum ether/ethyl acetate = 1/1).  $^1\text{H NMR}$  (400 MHz,  $\text{CDCl}_3$ )  $\delta$  7.94 (d,  $J = 8.0$  Hz, 2H), 7.49 (d,  $J = 8.0$  Hz, 2H), 7.40 (d,  $J = 7.6$  Hz, 1H), 7.25 (t,  $J = 7.6$  Hz, 1H), 7.02 (t,  $J = 7.6$  Hz, 1H), 6.82 (d,  $J = 8.0$  Hz, 1H), 4.04 (d,  $J = 13.6$  Hz, 1H), 3.85 (s, 3H), 3.63 (d,  $J = 13.6$  Hz, 1H), 3.19 (s, 3H), 1.58 (d,  $J = 3.2$  Hz, 6H), 1.43 (s, 3H);  $^{13}\text{C NMR}$  (101 MHz,  $\text{CDCl}_3$ )  $\delta$  178.0, 166.4, 143.2, 131.9, 130.2, 129.5, 128.9, 126.3, 124.3, 122.5, 108.5, 89.3, 86.2, 59.1, 52.7, 52.3, 45.2, 26.6, 25.2, 22.7, 22.6; HRMS Calculated for  $\text{C}_{24}\text{H}_{25}\text{NO}_5\text{S}$  ( $\text{M}+\text{Na}^+$ ): 462.1346; Found: 462.1349.

$^1\text{H NMR}$  spectrum (400 MHz,  $\text{CDCl}_3$ ) of compound **92**

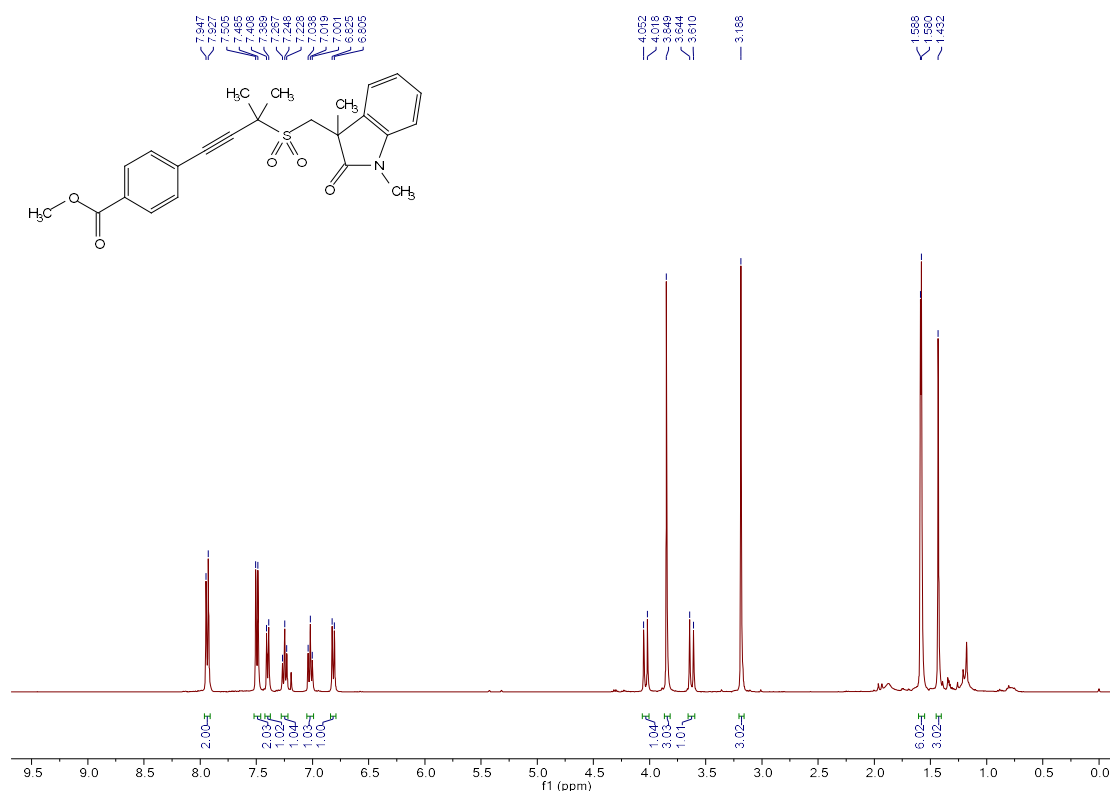

<sup>13</sup>C NMR spectrum (101 MHz, CDCl<sub>3</sub>) of compound **92**

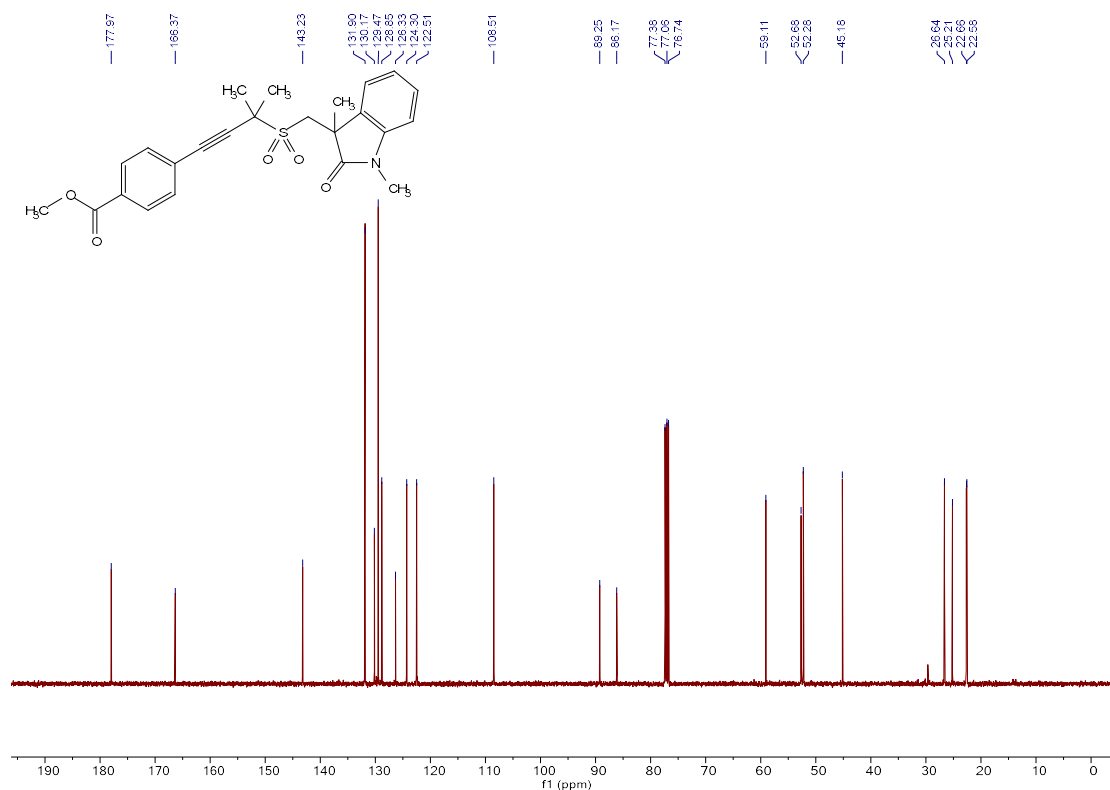

**3-(((4-(3-chlorophenyl)-2-methylbut-3-yn-2-yl)sulfonyl)methyl)-1,3-dimethylindolin-2-one (93).**

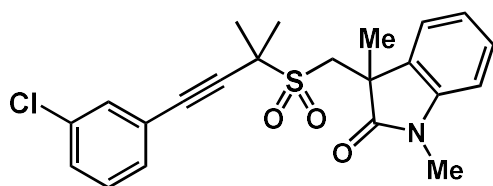

The product (52.4 mg, 63% yield) as brown solid was purified with silica gel chromatography (petroleum ether/ethyl acetate = 2/1). <sup>1</sup>H NMR (400 MHz, CDCl<sub>3</sub>) δ 7.42 – 7.39 (m, 2H), 7.34 – 7.32 (m, 1H), 7.28 – 7.18 (m, 3H), 7.03 (t, *J* = 7.6 Hz, 1H), 6.82 (d, *J* = 7.6 Hz, 1H), 4.02 (d, *J* = 13.6 Hz, 1H), 3.62 (d, *J* = 13.6 Hz, 1H), 3.19 (s, 3H), 1.57 (d, *J* = 6.0 Hz, 6H), 1.43 (s, 3H); <sup>13</sup>C NMR (101 MHz, CDCl<sub>3</sub>) δ 178.0, 143.3, 134.2, 131.8, 130.2, 130.1, 129.6, 129.3, 128.9, 124.3, 123.4, 122.6, 108.5, 87.7, 85.6, 59.1, 52.7, 45.2, 26.7, 25.3, 22.8, 22.6; HRMS Calculated for C<sub>22</sub>H<sub>22</sub>ClNO<sub>3</sub>S (M+Na<sup>+</sup>): 438.0901; Found: 438.0909.

**<sup>1</sup>H NMR spectrum (400 MHz, CDCl<sub>3</sub>) of compound 93**

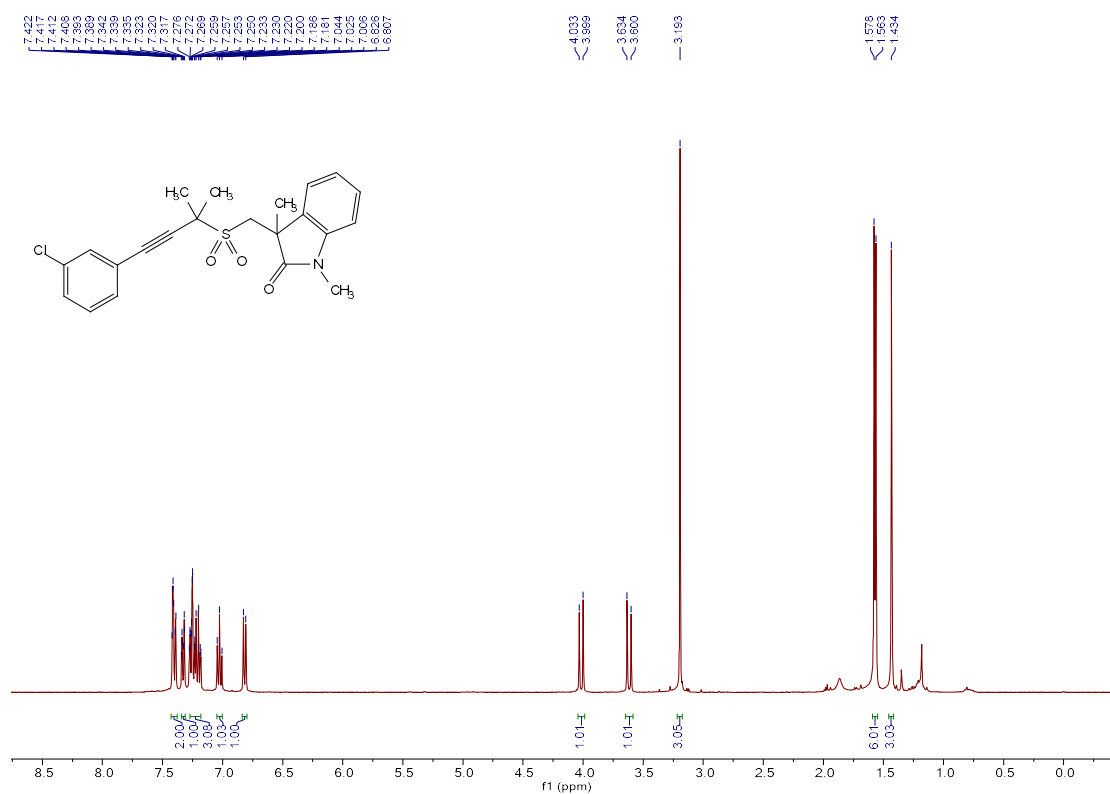

**<sup>13</sup>C NMR spectrum (101 MHz, CDCl<sub>3</sub>) of compound 93**

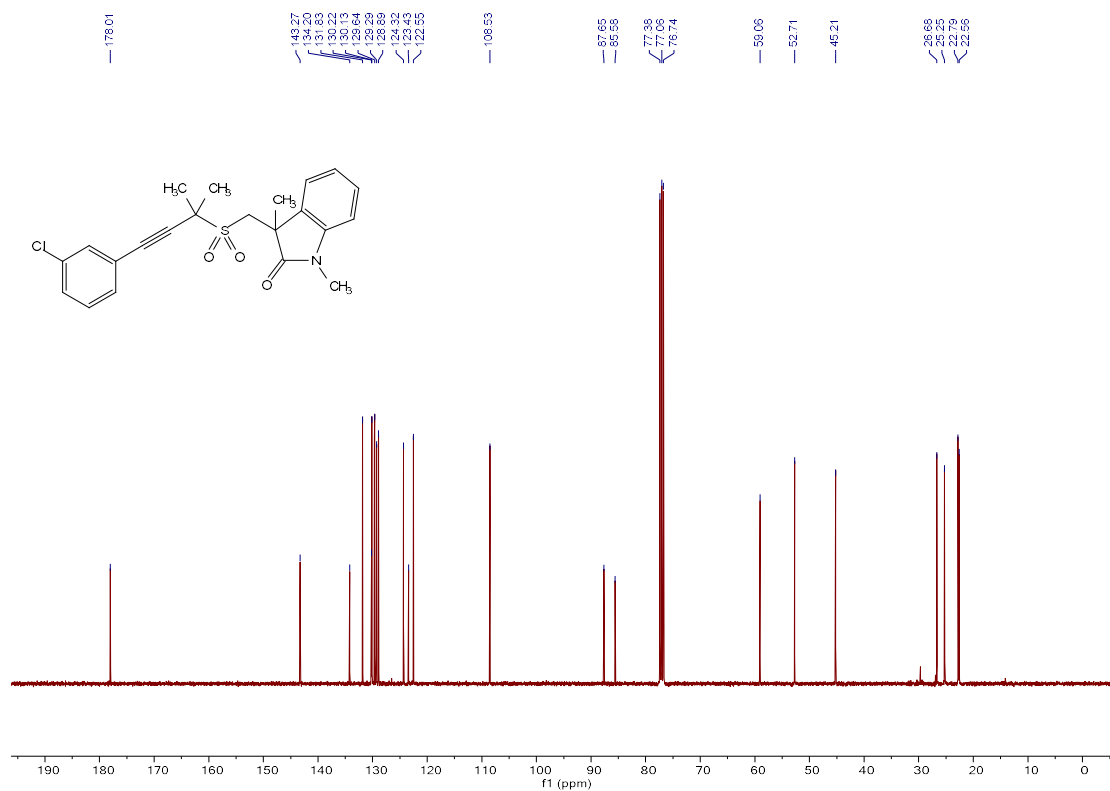

**1,3-dimethyl-3-(((2-methyl-4-(thiophen-3-yl)but-3-yn-2-yl)sulfonyl)methyl)indolin-2-one (94).**

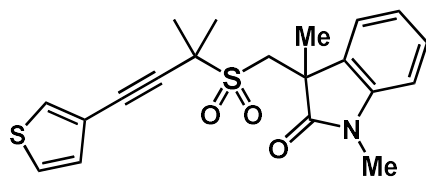

The product (42.6 mg, 55% yield) as brown oil was purified with silica gel chromatography (petroleum ether/ethyl acetate = 2/1). **<sup>1</sup>H NMR (400 MHz, CDCl<sub>3</sub>)** δ 7.52 (dd, *J* = 3.2 Hz, 1.2 Hz, 1H), 7.40 (d, *J* = 6.8 Hz, 1H), 7.25-7.21 (m, 2H), 7.11 (dd, *J* = 4.8 Hz, 0.8 Hz, 1H), 7.03 (t, *J* = 7.6 Hz, 1H), 6.82 (d, *J* = 7.6 Hz, 1H), 4.04 (d, *J* = 13.6 Hz, 1H), 3.63 (d, *J* = 14.0 Hz, 1H), 3.19 (s, 3H), 1.56 (d, *J* = 6.0 Hz, 6H), 1.43 (s, 3H); **<sup>13</sup>C NMR (101 MHz, CDCl<sub>3</sub>)** δ 178.1, 143.3, 130.3, 130.2, 130.0, 128.9, 125.5, 124.4, 122.5, 120.8, 108.5, 86.1, 82.3, 59.2, 52.6, 45.2, 26.7, 25.3, 22.9, 22.6; **HRMS** Calculated for C<sub>20</sub>H<sub>21</sub>NO<sub>3</sub>S<sub>2</sub> (M+Na<sup>+</sup>): 410.0855; Found: 410.0855.

**<sup>1</sup>H NMR spectrum (400 MHz, CDCl<sub>3</sub>) of compound 94**

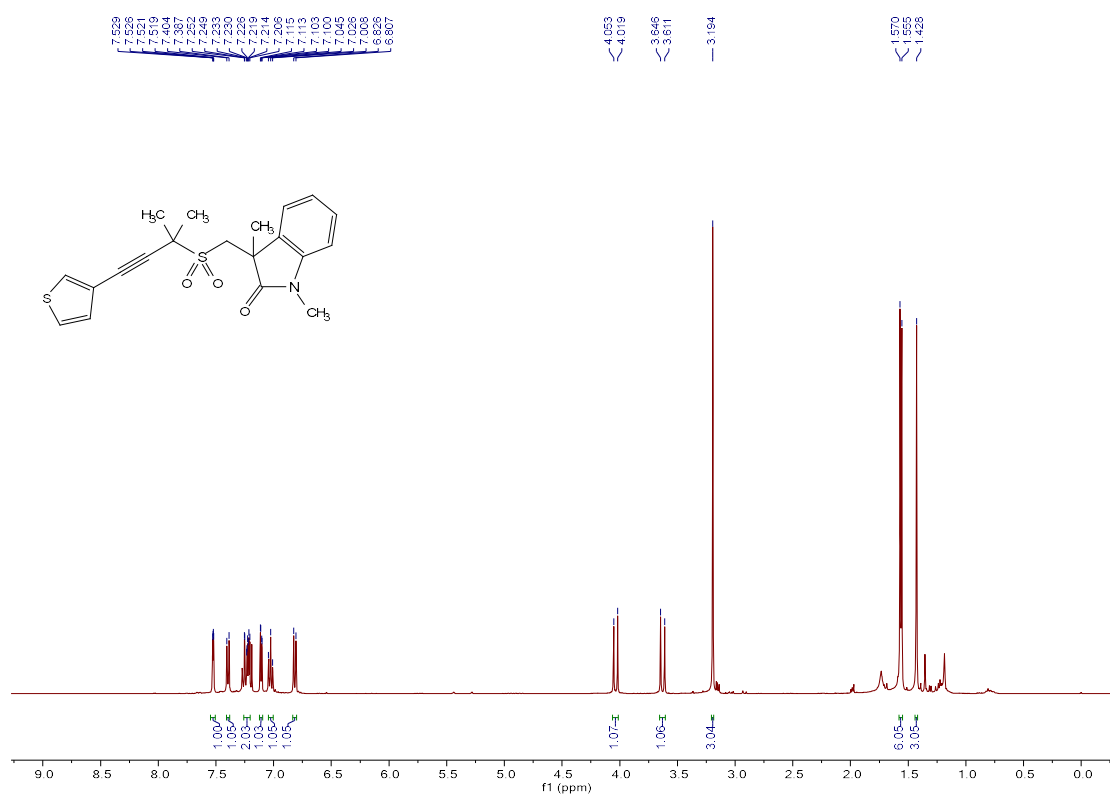

<sup>13</sup>C NMR spectrum (101 MHz, CDCl<sub>3</sub>) of compound **94**

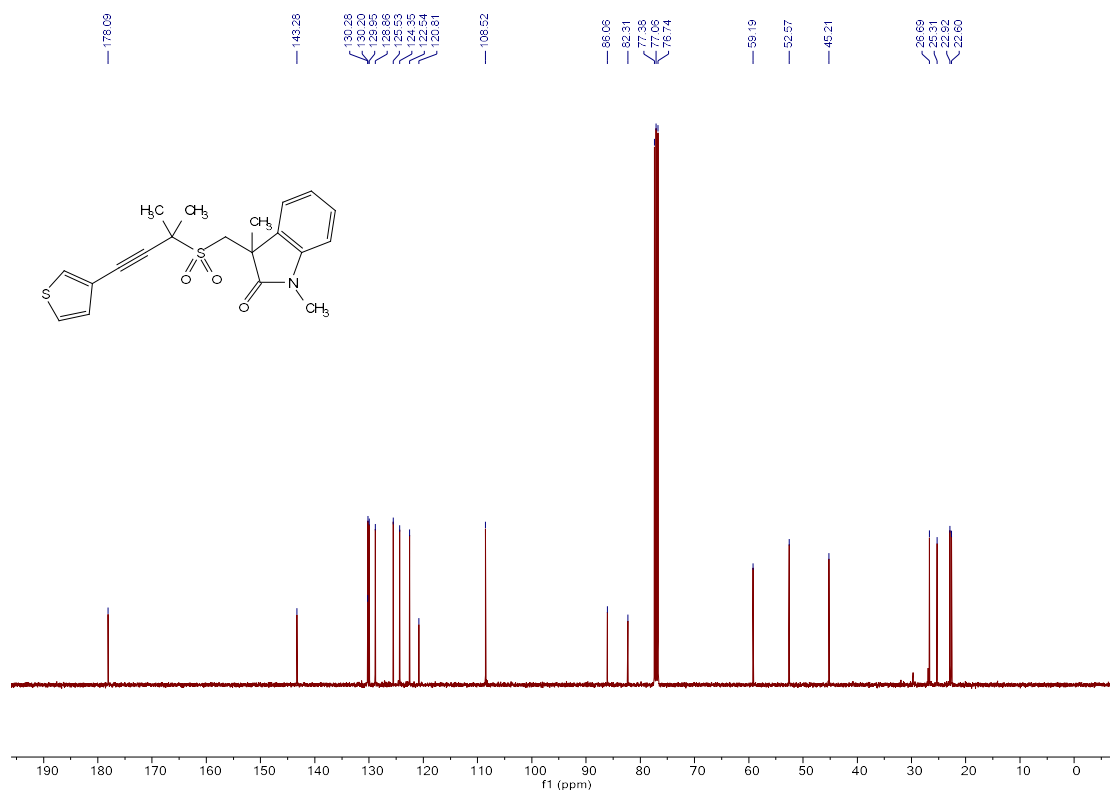

**(E)-3-(((3-(4-bromophenyl)allyl)sulfonyl)methyl)-1,3-dimethylindolin-2-one (97).**

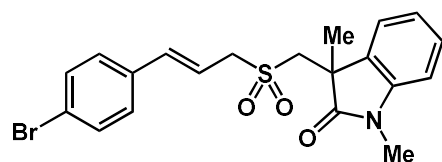

The product (1.4 g, 80% yield) as light yellow solid was purified with silica gel chromatography (petroleum ether/ethyl acetate = 2/1). <sup>1</sup>H NMR (400 MHz, CDCl<sub>3</sub>) δ 7.41 – 7.37 (m, 2H), 7.30 – 7.26 (m, 2H), 7.21 – 7.17 (m, 2H), 7.05 (t, *J* = 7.6 Hz, 1H), 6.84 (d, *J* = 7.6 Hz, 1H), 6.52 (d, *J* = 16.0 Hz, 1H), 6.11 – 6.03 (m, 1H), 3.63 – 3.58 (m, 2H), 3.51 – 3.42 (m, 2H), 3.19 (s, 3H), 1.38 (s, 3H); <sup>13</sup>C NMR (101 MHz, CDCl<sub>3</sub>) δ 177.9, 143.4, 138.0, 134.5, 131.9, 130.4, 129.1, 128.3, 123.5, 122.7, 115.9, 108.8, 59.4, 57.3, 45.6, 26.7, 25.0; HRMS Calculated for C<sub>20</sub>H<sub>20</sub>BrNO<sub>3</sub>S (M+Na<sup>+</sup>): 456.0239; Found: 456.0246.



<sup>1</sup>H NMR spectrum (400 MHz, CDCl<sub>3</sub>) of compound **97**

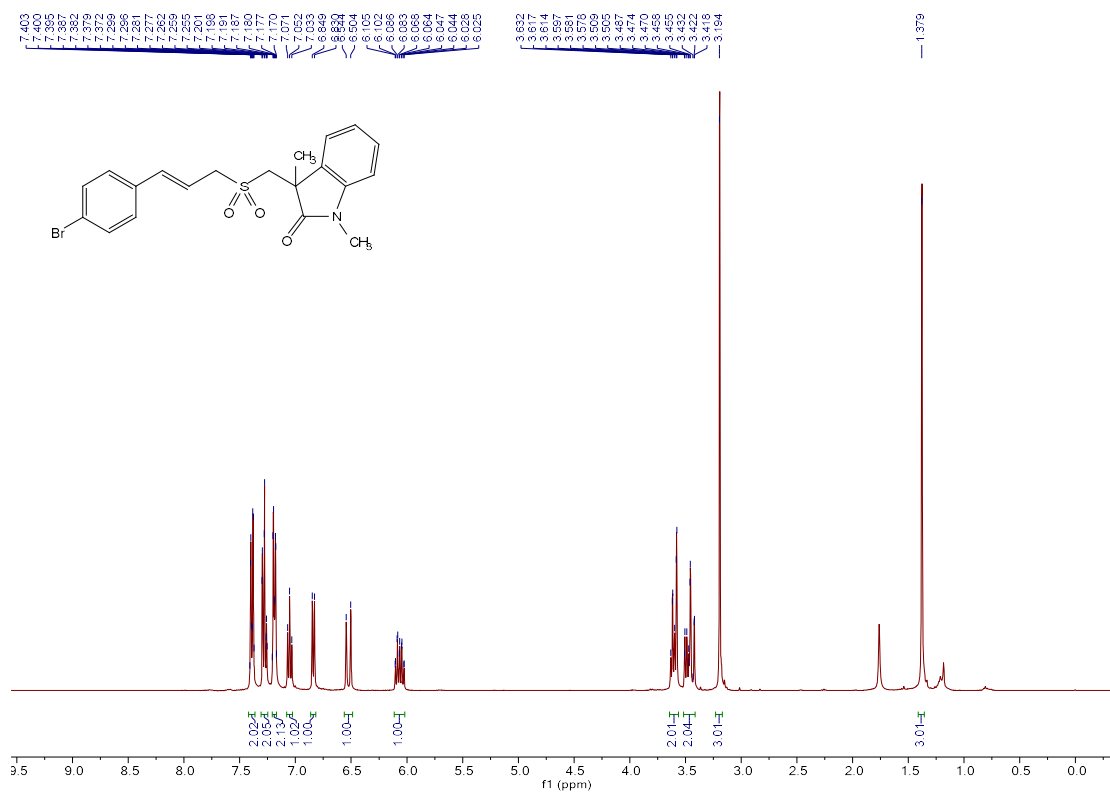

<sup>13</sup>C NMR spectrum (101 MHz, CDCl<sub>3</sub>) of compound **97**

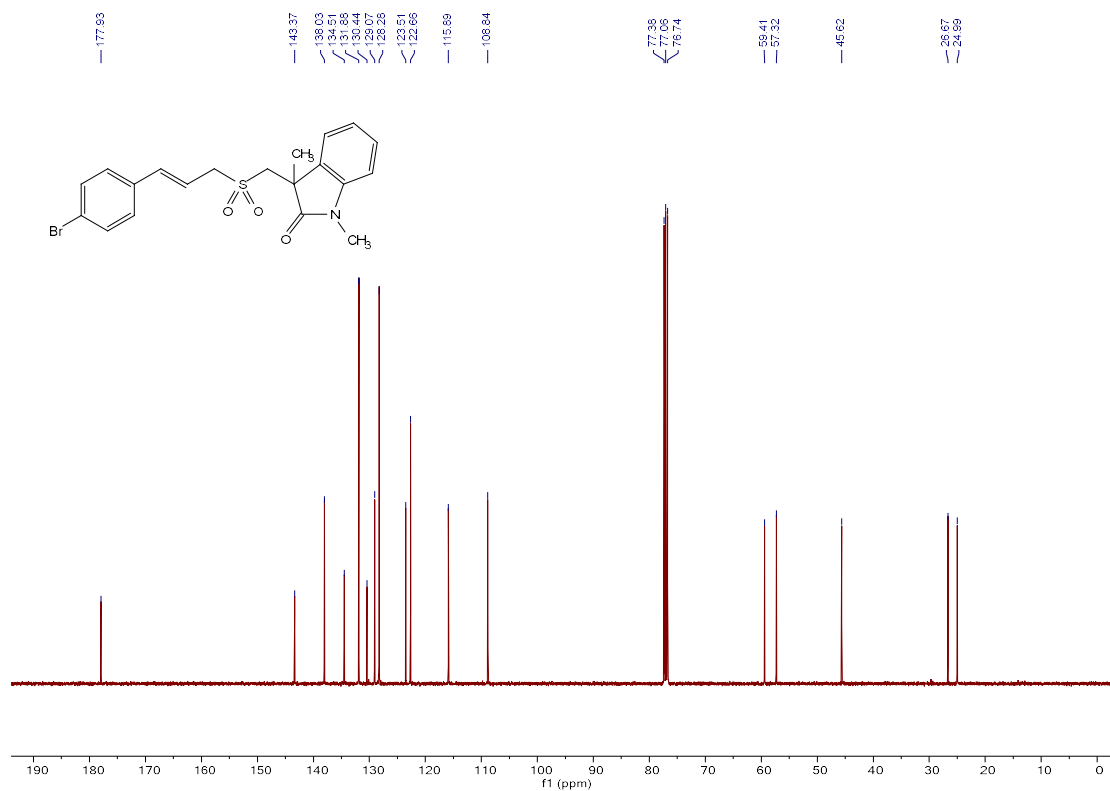

Supplement: d3qo00690e1.pdf [file d3qo00690e1.pdf]
